# Supplementary material for: Transcriptome and miRNAs Profiles Reveal Regulatory Network and Key Regulators of Secondary Xylem Formation in “84K” Poplar
Source: MDPI journal article supplement (doi:10.3390/ijms242216438), 2023-11-17
Supplement: s1 [file s1]

**Supplementary Table S1. Summary of RNA-Seq data and mapping statistics**

| <b>Libraries</b> | <b>Cleaned reads</b> | <b>Q30(%)</b> | <b>Mapped reads</b> | <b>Ratio</b> | <b>GC content(%)</b> |
|------------------|----------------------|---------------|---------------------|--------------|----------------------|
| Stage 1-1        | 63,415,856           | 94.06%        | 52,850,270          | 83.34%       | 44.63                |
| Stage 1-2        | 61,464,330           | 92.96%        | 51,165,407          | 83.24%       | 44.58                |
| Stage 1-3        | 59,603,792           | 94.63%        | 48,746,229          | 81.78%       | 44.58                |
| Stage 2-1        | 69,058,260           | 94.44%        | 57,510,085          | 83.28%       | 44.42                |
| Stage 2-2        | 74,835,696           | 94.18%        | 62,274,226          | 83.21%       | 44.24                |
| Stage 2-3        | 61,717,326           | 94.10%        | 51,175,131          | 82.92%       | 44.41                |
| Stage 3-1        | 64,791,676           | 94.17%        | 53,728,962          | 82.93%       | 44.36                |
| Stage 3-2        | 62,609,344           | 94.21%        | 51,813,026          | 82.76%       | 44.57                |
| Stage 3-3        | 63,542,114           | 94.06%        | 52,754,093          | 83.02%       | 44.38                |
| Total            | 581,038,394          | --            | 482,017,429         | 82.96%       | --                   |

Q30 (%): bases with a quality value > 30; Ratio: the ratio of mapped reads to cleaned reads
