# Supplementary material for: Transcriptome and miRNAs Profiles Reveal Regulatory Network and Key Regulators of Secondary Xylem Formation in “84K” Poplar
Source: MDPI journal article supplement (doi:10.3390/ijms242216438), 2023-11-17
Supplement: s1 [file s1]

**Supplementary Table S5. Statistics of small RNA-Seq data and mapping**

| <b>Libraries</b> | <b>Cleaned reads</b> | <b>Q30(%)</b> | <b>Mapped reads</b> | <b>Ratio</b> |
|------------------|----------------------|---------------|---------------------|--------------|
| Stage 1-1        | 4,247,416            | 96.63         | 2,647,418           | 62.33%       |
| Stage 1-2        | 4,741,252            | 96.58         | 2,941,253           | 62.04%       |
| Stage 1-3        | 5,302,185            | 96.57         | 3,502,185           | 66.05%       |
| Stage 2-1        | 6,131,877            | 96.27         | 3,682,726           | 60.06%       |
| Stage 2-2        | 5,852,742            | 96.29         | 3,540,676           | 60.50%       |
| Stage 2-3        | 4,656,548            | 95.31         | 2,856,549           | 61.34%       |
| Stage 3-1        | 5,829,718            | 95.9          | 3,829,719           | 65.69%       |
| Stage 3-2        | 9,502,370            | 96.72         | 6,366,465           | 67.00%       |
| Stage 3-3        | 4,968,264            | 96.22         | 3,079,293           | 61.98%       |
| Total            | 51,232,372           | --            | 32,446,284          | 63.33%       |

Q30 (%): bases with a quality value > 30; Ratio: the ratio of mapped reads to cleaned reads
