# Supplementary material for: Transcriptome and miRNAs Profiles Reveal Regulatory Network and Key Regulators of Secondary Xylem Formation in “84K” Poplar
Source: MDPI journal article supplement (doi:10.3390/ijms242216438), 2023-11-17
Supplement: s1 [file s1]

## Supplementary Figure S1

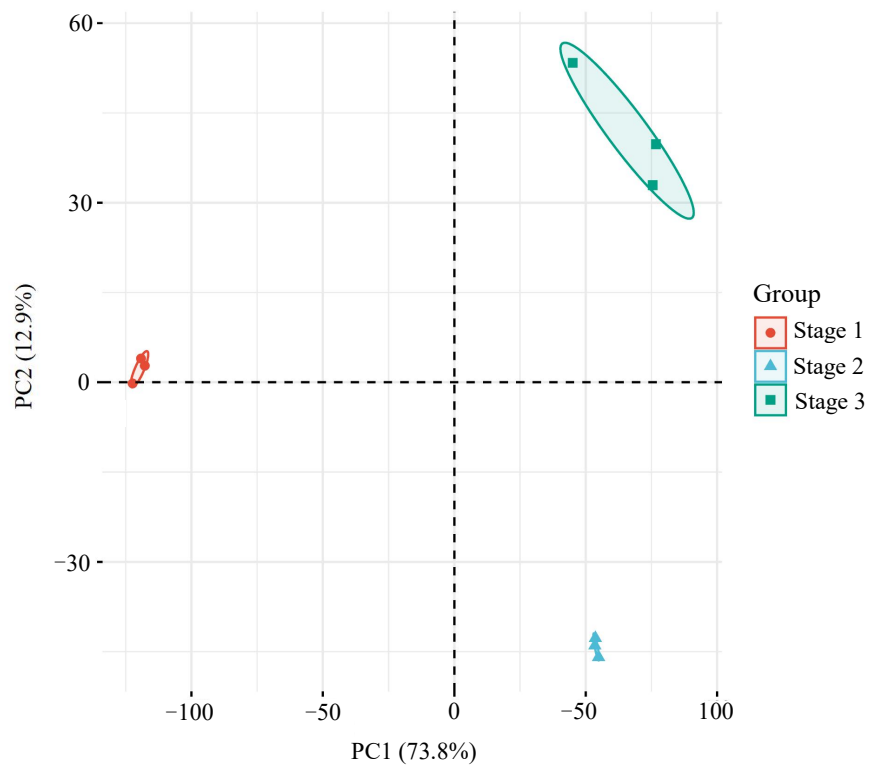

## Supplementary Figure S2

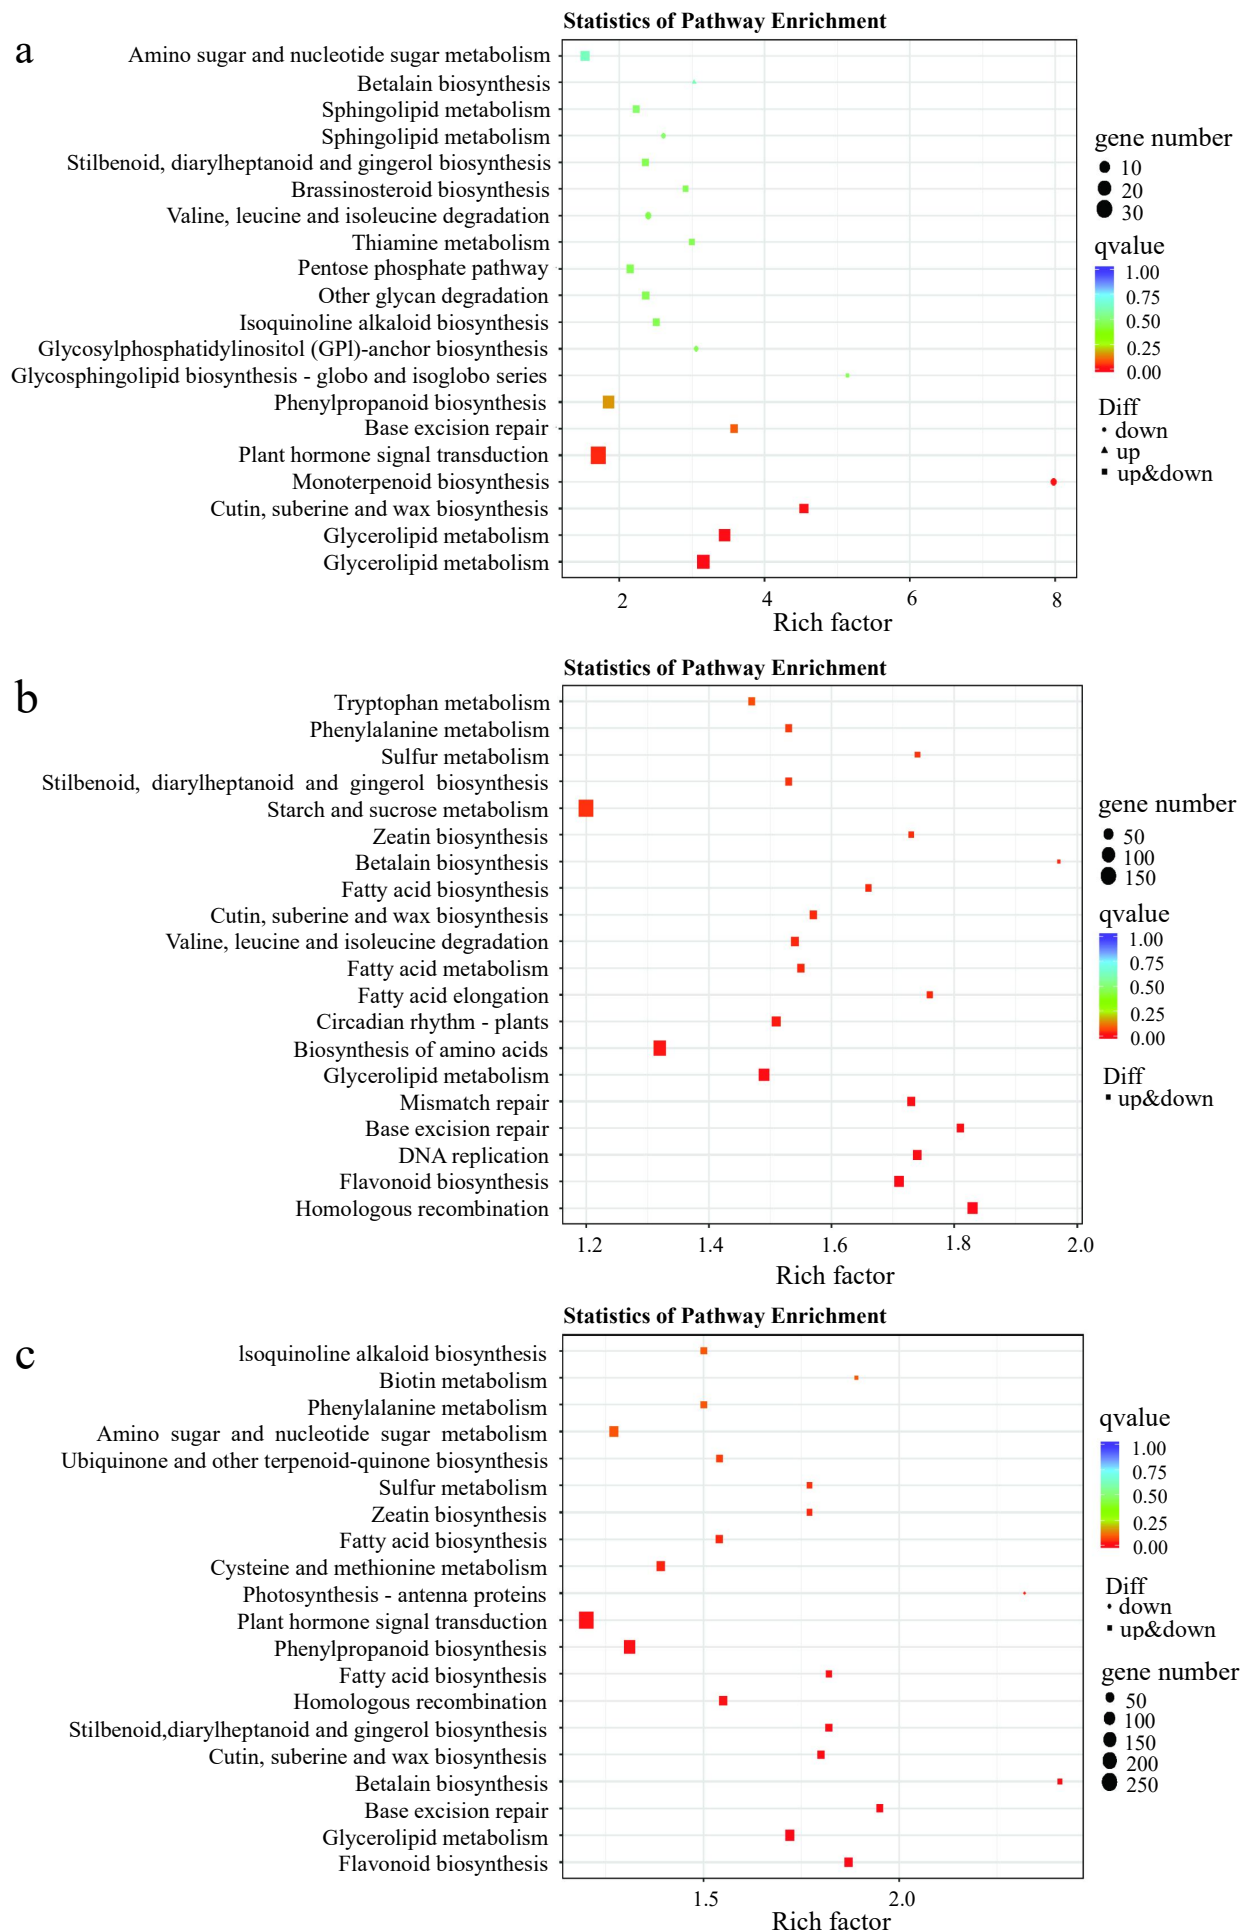

**Figure S2.** Enrichment of all differentially expressed genes (DEGs). High and low values are showed in red and green, respectively. (a-c) indicate the stage 1 versus stage 2, stage 2 versus stage 3, stage 1 versus stage 3 DEGs pairwise group, respectively.

### Supplementary Figure S3

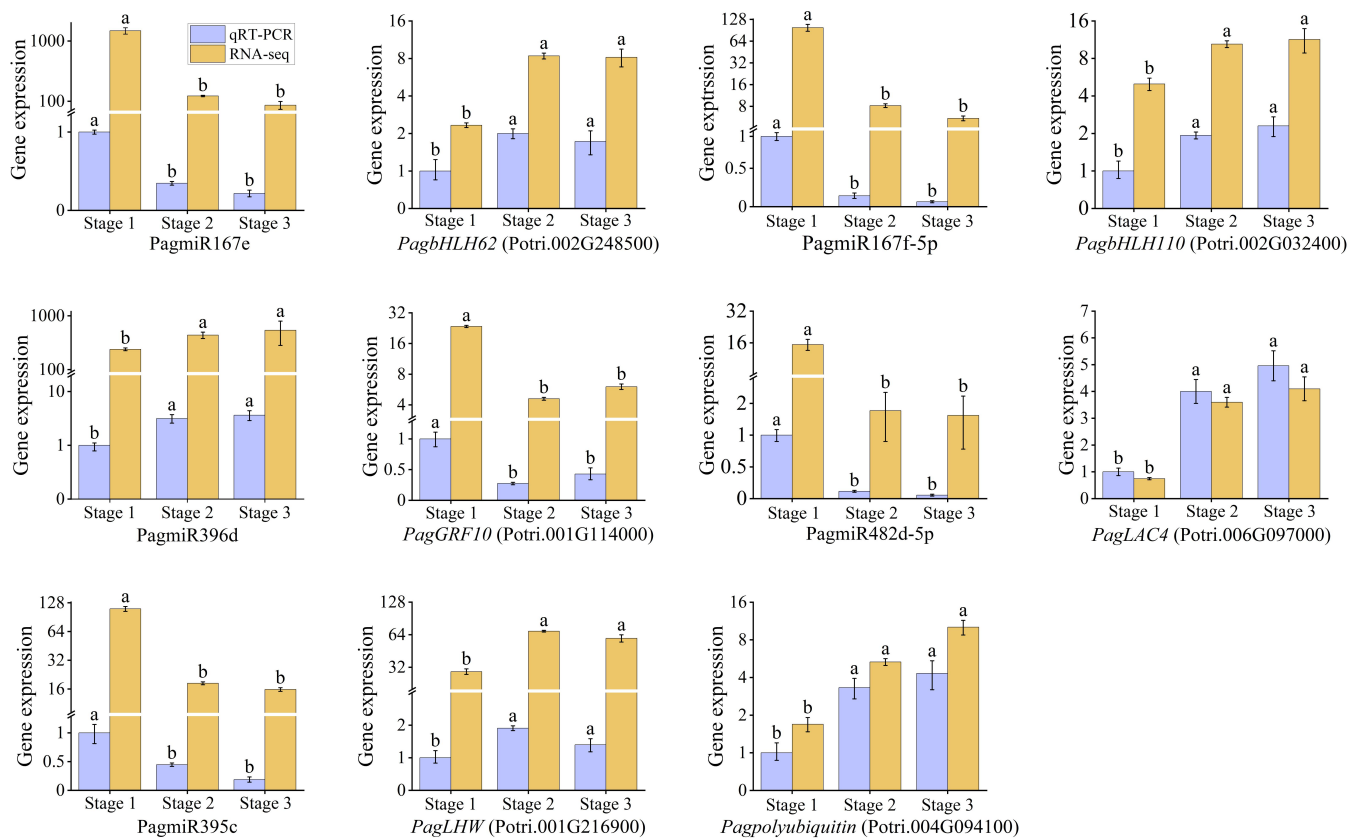

**Figure S3.** Validation of selected differentially expressed miRNAs (DEMs) and their targets by RT-qPCR. All data in the figure represents the mean values of three independent experiments  $\pm$  standard deviation (SD) ( $n = 3$ ). Different letters above the columns indicate significant differences at  $P < 0.05$ .
