# Supplementary material for: Transcriptome and miRNAs Profiles Reveal Regulatory Network and Key Regulators of Secondary Xylem Formation in “84K” Poplar
Source: MDPI journal article supplement (doi:10.3390/ijms242216438), 2023-11-17
Supplement: s1 [file s1]

**Supplementary Table S8. Putative orthologs of transcription factors involved in the secondary xylem formation.**

| <b>transcription factors</b> | <b>putative "84K "poplar orthologs</b> | <b>Reference</b>       |
|------------------------------|----------------------------------------|------------------------|
| PtrWOX4a (Potri.014G025300)  | PagWOX4 (Potri.014G025300)             | Hou et al., 2020 [19]  |
| PtrTCP20 (Potri.001G096600)  | PagTCP20 (Potri.001G096600)            | Hou et al., 2020 [19]  |
| AtNST1 (AT2G46770)           | PagNAC043 (Potri.014G104800)           | Sun et al., 2022 [2]   |
| AtNST2 (AT3G61910)           | PagNAC043 (Potri.002G178700)           | Sun et al., 2022 [2]   |
| AtSND1 (AT1G32770)           | PagNAC043 (Potri.001G448400)           | Sun et al., 2022 [2]   |
| AtLHW (AT2G27230)            | PagLHW (Potri.001G216900)              | NCBI                   |
| AtMYB46 (AT5G12870)          | PagMYB20 (Potri.017G130300)            | Xiao et al., 2021 [28] |
| AtMYB83 (AT3G08500)          | PagMYB20 (Potri.017G130300)            | Xiao et al., 2021 [28] |
| AtTCP13(AT3G02150)           | PagTCP13 (Potri. 017G094800)           | NCBI                   |
| AtKUA1 (AT5G47390)           | PagKUA1 (Potri.010G039300)             | NCBI                   |
| PtoGRF15 (Potri.014G012800)  | PagGRF1 (Potri.014G012800)             | Wang et al., 2023 [22] |
| PtrLAC4 (Potri.006G096900)   | PagLAC4 (Potri.006G096900)             | Lu et al., 2013 [61]   |

Q30 (%): bases with a quality value > 30; Ratio: the ratio of mapped reads to cleaned reads
