# Supplementary material for: Transcriptome and miRNAs Profiles Reveal Regulatory Network and Key Regulators of Secondary Xylem Formation in “84K” Poplar
Source: Int J Mol Sci. 2023 Nov 17;24(22):16438. doi: 10.3390/ijms242216438 (PMC10671414; doi:10.3390/ijms242216438)
Supplement: Supplementary file 1 [file ijms-24-16438-s001.zip]

Archive with 10 entries (10 files):
- Supplementary Figures S1-S3.pdf
- Supplementary Table S1.pdf
- Supplementary Table S2.xlsx
- Supplementary Table S3.xlsx
- Supplementary Table S4.xlsx
- Supplementary Table S5.pdf
- Supplementary Table S6.xlsx
- Supplementary Table S7.xlsx
- Supplementary Table S8.pdf
- Supplementary Table S9.xlsx
