# Supplementary material for: Transcriptome and miRNAs Profiles Reveal Regulatory Network and Key Regulators of Secondary Xylem Formation in “84K” Poplar
Source: Int J Mol Sci. 2023 Nov 17;24(22):16438. doi: 10.3390/ijms242216438 (PMC10671414; doi:10.3390/ijms242216438)
Supplement: Supplementary file 1 [file ijms-24-16438-s001.zip › Supplementary Table S2.xlsx]

## Sheet: DEGs numbers
Supplementary Table S2. Number of all differentially expressed genes (DEGs) during secondary growth of "84K" poplar stems
	DEGs	up	down
stage 1 vs stage 2	7507	3575	3932
stage 2 vs stage 3	580	210	370
stage 1 vs stage 3	7447	3664	3783
total	9055
Note: (a) Detailed list of DEGs in stage l versus stage 2 of "84K" poplar stems (please see sheet "stage l versus stage 2")
Note: (b) Detailed list of DEGs in stage 2 versus stage 3 of "84K" poplar stems (please see sheet "stage 2 versus stage 3")
Note: (c) Detailed list of DEGs in stage l versus stage 3 of "84K" poplar stems (please see sheet "stage l versus stage 3")

## Sheet: (a) stage 1 versus stage 2
(a) Detailed list of DEGs in stage 1 versus stage 2 of "84K" poplar stems
gene ID	gene name	stage 1-1 FPKM	stage 1-2 FPKM	stage 1-3 FPKM	stage 2-1 FPKM	stage 2-2 FPKM	stage 2-3 FPKM	FDR	log2FC	regulated	COG class	COG class annotation	GO annotation	KEGG annotation	KEGG pathway annotation	KOG class	KOG class annotation	Pfam annotation	Swiss-Prot annotation	eggNOG class	eggNOG class annotation	NR annotation
gene-POPTR_017G090100	--	6.42258	7.57911	7.61929	16.3121	14.8017	14.7406	8.92343e-34	1.13447	up	[C]	Energy production and conversion	--	K17908|1.9e-09|mng:MNEG_2141|K17908 autophagy-related protein 18 | (RefSeq) WD repeat domain phosphoinositide-interacting protein 2	Autophagy - other (ko04136)	--	--	Domain of unknown function (DUF4336)	--	S	Function unknown	uncharacterized protein LOC7484558 [Populus trichocarpa]
gene-POPTR_009G114300	USPL1	4.56182	4.71737	4.30462	18.837	18.6114	18.5931	3.029e-113	2.08851	up	--	--	Biological Process: reproduction (GO:0000003);; Cellular Component: storage vacuole (GO:0000322);; Cellular Component: plant-type vacuole (GO:0000325);; Cellular Component: protein storage vacuole (GO:0000326);; Biological Process: developmental process involved in reproduction (GO:0003006);; Cellular Component: cellular_component (GO:0005575);; Cellular Component: intracellular (GO:0005622);; Ce…	--	--	--	--	BURP domain	BURP domain protein USPL1 OS=Arabidopsis thaliana OX=3702 GN=USPL1 PE=2 SV=1	S	Function unknown	BURP domain protein USPL1 [Populus trichocarpa]
gene-POPTR_008G070400	At2g30020	0.196774	0.244062	0.060173	0.554598	1.17126	1.09148	4.8769e-09	2.32698	up	[T]	Signal transduction mechanisms	Molecular Function: protein serine/threonine phosphatase activity (GO:0004722);; Molecular Function: magnesium-dependent protein serine/threonine phosphatase activity (GO:0004724);; Molecular Function: metal ion binding (GO:0046872);;	K17506|1.3e-218|pop:7494509|K17506 protein phosphatase 1L [EC:3.1.3.16] | (RefSeq) probable protein phosphatase 2C 2	--	[T]	Signal transduction mechanisms	Protein phosphatase 2C	Probable protein phosphatase 2C 25 OS=Arabidopsis thaliana OX=3702 GN=At2g30020 PE=1 SV=1	T	Signal transduction mechanisms	probable protein phosphatase 2C 2 [Populus trichocarpa]
gene-POPTR_006G204300	NHL10	0.283659	0.699862	0.356979	1.45951	1.70881	1.64981	2.32684e-07	1.79561	up	--	--	Cellular Component: plasmodesma (GO:0009506);; Cellular Component: integral component of membrane (GO:0016021);; Cellular Component: anchored component of plasma membrane (GO:0046658);;	K04077|4.7e-06|cmax:111488761|K04077 chaperonin GroEL | (RefSeq) LOW QUALITY PROTEIN: chaperonin CPN60-like 2, mitochondrial	RNA degradation (ko03018)	--	--	Late embryogenesis abundant protein	NDR1/HIN1-like protein 10 OS=Arabidopsis thaliana OX=3702 GN=NHL10 PE=2 SV=1	S	Function unknown	NDR1/HIN1-like protein 10 [Populus trichocarpa]
gene-POPTR_013G024200	AMI1	1.60061	1.55379	1.49541	12.9515	12.9567	11.9722	9.57677e-182	3.00646	up	[J]	Translation, ribosomal structure and biogenesis	Molecular Function: molecular_function (GO:0003674);; Molecular Function: catalytic activity (GO:0003824);; Molecular Function: amidase activity (GO:0004040);; Cellular Component: cellular_component (GO:0005575);; Cellular Component: intracellular (GO:0005622);; Cellular Component: cell (GO:0005623);; Cellular Component: nucleus (GO:0005634);; Cellular Component: nucleoplasm (GO:0005654);; Cellul…	K01426|1.1e-248|pop:7481767|K01426 amidase [EC:3.5.1.4] | (RefSeq) amidase 1 isoform X1	Arginine and proline metabolism (ko00330);; Phenylalanine metabolism (ko00360);; Tryptophan metabolism (ko00380)	[J]	Translation, ribosomal structure and biogenesis	Amidase	Amidase 1 OS=Arabidopsis thaliana OX=3702 GN=AMI1 PE=1 SV=1	J	Translation, ribosomal structure and biogenesis	amidase 1 isoform X1 [Populus trichocarpa]
gene-POPTR_015G029200	At4g15970	0.332131	0.627412	0.381982	1.15651	0.936121	1.20124	2.54121e-05	1.29874	up	--	--	--	K11714|3.6e-08|mus:103979316|K11714 rhamnogalacturonan II specific xylosyltransferase [EC:2.4.2.-] | (RefSeq) UDP-D-xylose:L-fucose alpha-1,3-D-xylosyltransferase MGP4	--	--	--	Nucleotide-diphospho-sugar transferase	Uncharacterized protein At4g15970 OS=Arabidopsis thaliana OX=3702 GN=At4g15970 PE=2 SV=1	S	Function unknown	uncharacterized protein At4g15970 isoform X1 [Populus trichocarpa]
gene-POPTR_007G042900	CML30	10.5335	8.882	8.74856	23.5291	25.8085	24.8877	1.02186e-46	1.44307	up	--	--	Molecular Function: calcium ion binding (GO:0005509);;	K13448|2.4e-49|pop:7483121|K13448 calcium-binding protein CML | (RefSeq) calmodulin-like protein 1	Plant-pathogen interaction (ko04626)	[T]	Signal transduction mechanisms	EF hand	Calmodulin-like protein 30 OS=Arabidopsis thaliana OX=3702 GN=CML30 PE=2 SV=1	T	Signal transduction mechanisms	calmodulin-like protein 1 [Populus trichocarpa]
gene-POPTR_005G117500	CYP84A1	1.88967	1.74372	2.33009	36.0323	33.7317	33.1249	0	4.14936	up	[QV]	Secondary metabolites biosynthesis, transport and catabolism;; Defense mechanisms	Molecular Function: iron ion binding (GO:0005506);; Biological Process: lignin biosynthetic process (GO:0009809);; Cellular Component: membrane (GO:0016020);; Cellular Component: integral component of membrane (GO:0016021);; Molecular Function: oxidoreductase activity, acting on paired donors, with incorporation or reduction of molecular oxygen, NAD(P)H as one donor, and incorporation of one atom…	K09755|1.3e-301|pop:18099227|K09755 ferulate-5-hydroxylase [EC:1.14.-.-] | (RefSeq) cytochrome P450 84A1	Phenylpropanoid biosynthesis (ko00940)	[Q]	Secondary metabolites biosynthesis, transport and catabolism	Cytochrome P450	Cytochrome P450 84A1 OS=Arabidopsis thaliana OX=3702 GN=CYP84A1 PE=1 SV=1	Q	Secondary metabolites biosynthesis, transport and catabolism	cytochrome P450 84A1 [Populus trichocarpa]
gene-POPTR_008G071500	LBD21	9.85811	9.23659	8.4012	23.0546	24.1144	24.3101	3.11828e-41	1.42156	up	--	--	--	K13944|2.2e-29|mcha:111015325|K13944 LOB domain-containing protein 16 | (RefSeq) LOB domain-containing protein 16-like	--	--	--	Lateral organ boundaries (LOB) domain	LOB domain-containing protein 21 OS=Arabidopsis thaliana OX=3702 GN=LBD21 PE=2 SV=1	S	Function unknown	LOB domain-containing protein 21 [Populus trichocarpa]
gene-POPTR_010G073166	At1g06620	2.29392	1.35519	2.40587	8.30807	7.76299	7.74437	2.30112e-36	2.00971	up	[Q]	Secondary metabolites biosynthesis, transport and catabolism	Molecular Function: oxidoreductase activity (GO:0016491);; Molecular Function: metal ion binding (GO:0046872);;	K13229|9.8e-94|sbi:8070754|K13229 2,4-dihydroxy-1,4-benzoxazin-3-one-glucoside dioxygenase [EC:1.14.11.59] | (RefSeq) DIBOA-glucoside dioxygenase BX6	Benzoxazinoid biosynthesis (ko00402)	[QR]	Secondary metabolites biosynthesis, transport and catabolism;; General function prediction only	2OG-Fe(II) oxygenase superfamily	1-aminocyclopropane-1-carboxylate oxidase homolog 1 OS=Arabidopsis thaliana OX=3702 GN=At1g06620 PE=2 SV=1	Q	Secondary metabolites biosynthesis, transport and catabolism	1-aminocyclopropane-1-carboxylate oxidase homolog 1 [Populus trichocarpa]
gene-POPTR_001G304401	PAB	5.39848	5.63338	5.74526	12.1399	13.5055	11.4166	4.48394e-10	1.17432	up	--	--	--	--	--	--	--	--	Protein IN CHLOROPLAST ATPASE BIOGENESIS, chloroplastic OS=Arabidopsis thaliana OX=3702 GN=PAB PE=1 SV=1	--	--	hypothetical protein POPTR_001G304401 [Populus trichocarpa]
gene-POPTR_016G001900	--	0.690242	0.657669	0.83649	1.63972	1.80739	1.55882	1.30582e-06	1.22322	up	--	--	Cellular Component: integral component of membrane (GO:0016021);;	--	--	--	--	--	--	--	--	hypothetical protein POPTR_016G001900 [Populus trichocarpa]
gene-POPTR_006G041301	At3g57050	0.339014	0.445772	0.409516	1.07271	1.01292	0.575255	0.000668409	1.13385	up	[E]	Amino acid transport and metabolism	Molecular Function: catalytic activity (GO:0003824);; Biological Process: transsulfuration (GO:0019346);; Molecular Function: pyridoxal phosphate binding (GO:0030170);;	K01760|5.2e-38|pop:18106110|K01760 cysteine-S-conjugate beta-lyase [EC:4.4.1.13] | (RefSeq) cystathionine beta-lyase, chloroplastic	Cysteine and methionine metabolism (ko00270);; Selenocompound metabolism (ko00450);; Biosynthesis of amino acids (ko01230)	[E]	Amino acid transport and metabolism	Cys/Met metabolism PLP-dependent enzyme	Cystathionine beta-lyase, chloroplastic OS=Arabidopsis thaliana OX=3702 GN=At3g57050 PE=1 SV=1	E	Amino acid transport and metabolism	hypothetical protein POPTR_006G041301 [Populus trichocarpa]
gene-POPTR_008G032000	RABC2A	0.774805	0.70297	0.627374	3.90327	3.75757	3.66351	3.85968e-28	2.42617	up	[R]	General function prediction only	Molecular Function: GTPase activity (GO:0003924);; Molecular Function: GTP binding (GO:0005525);; Cellular Component: Golgi apparatus (GO:0005794);; Biological Process: intracellular protein transport (GO:0006886);; Cellular Component: endomembrane system (GO:0012505);; Biological Process: Rab protein signal transduction (GO:0032482);;	K07910|1.5e-118|pop:7479847|K07910 Ras-related protein Rab-18 | (RefSeq) ras-related protein RABC2a	--	[R]	General function prediction only	Ras family	Ras-related protein RABC2a OS=Arabidopsis thaliana OX=3702 GN=RABC2A PE=1 SV=1	U	Intracellular trafficking, secretion, and vesicular transport	ras-related protein RABC2a [Populus trichocarpa]
gene-POPTR_004G038500	--	15.9195	15.7432	16.7491	38.0726	37.224	38.3094	5.71185e-81	1.28146	up	--	--	Molecular Function: catechol oxidase activity (GO:0004097);;	K00422|2.2e-41|pop:7485450|K00422 polyphenol oxidase [EC:1.10.3.1] | (RefSeq) polyphenol oxidase, chloroplastic	Tyrosine metabolism (ko00350);; Isoquinoline alkaloid biosynthesis (ko00950)	--	--	Protein of unknown function (DUF_B2219)	(+)-larreatricin hydroxylase, chloroplastic OS=Larrea tridentata OX=66636 PE=1 SV=1	S	Function unknown	polyphenol oxidase, chloroplastic [Populus trichocarpa]
gene-POPTR_007G128600	CML5	7.6819	9.00814	7.97489	16.9581	15.9816	17.3582	1.7138e-27	1.07487	up	--	--	Molecular Function: calcium ion binding (GO:0005509);;	K13448|1.0e-106|pop:7491758|K13448 calcium-binding protein CML | (RefSeq) calmodulin-like protein 3	Plant-pathogen interaction (ko04626)	[T]	Signal transduction mechanisms	EF hand	Calmodulin-like protein 5 OS=Arabidopsis thaliana OX=3702 GN=CML5 PE=2 SV=2	T	Signal transduction mechanisms	calmodulin-like protein 3 [Populus trichocarpa]
gene-POPTR_010G066600	PXG1	5.31086	4.68449	4.30263	10.4323	11.2806	10.8146	3.66304e-23	1.22784	up	[T]	Signal transduction mechanisms	Molecular Function: monooxygenase activity (GO:0004497);; Molecular Function: calcium ion binding (GO:0005509);;	K17991|1.6e-140|pop:7459986|K17991 peroxygenase [EC:1.11.2.3] | (RefSeq) peroxygenase 1	Cutin, suberine and wax biosynthesis (ko00073)	--	--	Caleosin related protein	Peroxygenase 1 OS=Arabidopsis thaliana OX=3702 GN=PXG1 PE=1 SV=1	S	Function unknown	peroxygenase 1 [Populus trichocarpa]
gene-POPTR_003G091400	--	0.226378	0.384522	0.169544	1.67623	1.13382	1.37105	2.13276e-08	2.27396	up	--	--	--	--	--	--	--	--	--	--	--	uncharacterized protein LOC18096967 [Populus trichocarpa]
gene-POPTR_019G104500	ULT1	5.59554	5.00126	4.87565	13.8217	12.7957	11.527	1.00685e-33	1.34765	up	--	--	Molecular Function: DNA binding (GO:0003677);; Cellular Component: nucleus (GO:0005634);; Cellular Component: cytosol (GO:0005829);;	--	--	--	--	SAND domain	Protein ULTRAPETALA 1 OS=Arabidopsis thaliana OX=3702 GN=ULT1 PE=1 SV=1	S	Function unknown	protein ULTRAPETALA 1 isoform X1 [Populus trichocarpa]
gene-POPTR_T078350	OCT7	0.114797	0.310624	0.339709	2.02264	3.19	2.59864	4.01027e-19	3.20939	up	[G]	Carbohydrate transport and metabolism	Cellular Component: integral component of membrane (GO:0016021);; Molecular Function: transmembrane transporter activity (GO:0022857);;	K08202|3.0e-14|lang:109325349|K08202 MFS transporter, OCT family, solute carrier family 22 (organic cation transporter), member 4/5 | (RefSeq) organic cation/carnitine transporter 4-like	--	[R]	General function prediction only	Sugar (and other) transporter	Organic cation/carnitine transporter 7 OS=Arabidopsis thaliana OX=3702 GN=OCT7 PE=2 SV=1	C	Energy production and conversion	organic cation/carnitine transporter 7 isoform X1 [Populus trichocarpa]
gene-POPTR_005G185700	SKP2B	13.7977	12.8801	12.5881	59.8644	61.0083	56.0251	2.12233e-265	2.21935	up	--	--	Cellular Component: ubiquitin ligase complex (GO:0000151);; Molecular Function: molecular_function (GO:0003674);; Molecular Function: catalytic activity (GO:0003824);; Molecular Function: ubiquitin-protein transferase activity (GO:0004842);; Molecular Function: protein binding (GO:0005515);; Cellular Component: cellular_component (GO:0005575);; Cellular Component: intracellular (GO:0005622);; Cel…	K03875|2.1e-155|pop:7469194|K03875 F-box and leucine-rich repeat protein 1 (S-phase kinase-associated protein 2) | (RefSeq) F-box protein SKP2B	Ubiquitin mediated proteolysis (ko04120)	[R]	General function prediction only	Leucine Rich repeat	F-box protein SKP2B OS=Arabidopsis thaliana OX=3702 GN=SKP2B PE=1 SV=1	S	Function unknown	hypothetical protein POPTR_005G185700 [Populus trichocarpa]
gene-POPTR_002G005000	AHL10	0.468956	0.457855	0.402336	1.12557	0.951352	1.08525	3.14627e-05	1.24557	up	--	--	Molecular Function: AT DNA binding (GO:0003680);; Cellular Component: nucleus (GO:0005634);;	--	--	--	--	Plants and Prokaryotes Conserved (PCC) domain	AT-hook motif nuclear-localized protein 10 OS=Arabidopsis thaliana OX=3702 GN=AHL10 PE=1 SV=2	K	Transcription	AT-hook motif nuclear-localized protein 10 [Populus trichocarpa]
gene-POPTR_001G400100	--	1048.99	1011.4	801.564	6105.29	6185.15	7348.22	2.88744e-68	2.80316	up	--	--	Molecular Function: molecular_function (GO:0003674);; Molecular Function: binding (GO:0005488);; Molecular Function: copper ion binding (GO:0005507);; Biological Process: cellular ion homeostasis (GO:0006873);; Biological Process: cellular metal ion homeostasis (GO:0006875);; Biological Process: cellular copper ion homeostasis (GO:0006878);; Biological Process: biological_process (GO:0008150);; M…	--	--	--	--	--	Metallothionein-like protein type 3 OS=Carica papaya OX=3649 PE=3 SV=1	S	Function unknown	metallothionein-like protein type 3 [Populus trichocarpa]
gene-POPTR_013G159500	At1g06840	0.21492	0.313533	0.203216	0.715173	0.479514	0.653569	9.24353e-05	1.31688	up	[T]	Signal transduction mechanisms	Molecular Function: transmembrane receptor protein serine/threonine kinase activity (GO:0004675);; Molecular Function: ATP binding (GO:0005524);; Cellular Component: plasma membrane (GO:0005886);; Biological Process: protein phosphorylation (GO:0006468);;	K16224|2.1e-62|bna:106356473|K16224 senescence-induced receptor-like serine/threonine-protein kinase | (RefSeq) senescence-induced receptor-like serine/threonine-protein kinase	MAPK signaling pathway - plant (ko04016);; Plant-pathogen interaction (ko04626)	--	--	Protein tyrosine and serine/threonine kinase	Probable LRR receptor-like serine/threonine-protein kinase At1g06840 OS=Arabidopsis thaliana OX=3702 GN=At1g06840 PE=1 SV=2	T	Signal transduction mechanisms	hypothetical protein POPTR_013G159500 [Populus trichocarpa]
gene-POPTR_014G146600	CTL1	303.958	279.729	314.819	627.339	621.057	559.684	4.15663e-94	1.06103	up	[G]	Carbohydrate transport and metabolism	Molecular Function: chitinase activity (GO:0004568);; Biological Process: carbohydrate metabolic process (GO:0005975);; Biological Process: chitin catabolic process (GO:0006032);; Biological Process: cell wall macromolecule catabolic process (GO:0016998);;	K20547|9.0e-51|mesc:110612514|K20547 basic endochitinase B [EC:3.2.1.14] | (RefSeq) endochitinase-like	Amino sugar and nucleotide sugar metabolism (ko00520);; MAPK signaling pathway - plant (ko04016)	[R]	General function prediction only	Chitinase class I	Chitinase-like protein 1 OS=Arabidopsis thaliana OX=3702 GN=CTL1 PE=1 SV=1	S	Function unknown	chitinase-like protein 1 [Populus trichocarpa]
gene-POPTR_013G083600	GSVIVT00023967001	0.297803	0.400191	0.514175	1.92514	0.903926	1.2182	1.09748e-06	1.69718	up	--	--	Molecular Function: peroxidase activity (GO:0004601);; Cellular Component: extracellular region (GO:0005576);; Biological Process: response to oxidative stress (GO:0006979);; Molecular Function: heme binding (GO:0020037);; Biological Process: hydrogen peroxide catabolic process (GO:0042744);; Molecular Function: metal ion binding (GO:0046872);;	K00430|8.7e-179|pop:18104215|K00430 peroxidase [EC:1.11.1.7] | (RefSeq) peroxidase 4	Phenylpropanoid biosynthesis (ko00940)	--	--	Peroxidase	Peroxidase 4 OS=Vitis vinifera OX=29760 GN=GSVIVT00023967001 PE=1 SV=1	Q	Secondary metabolites biosynthesis, transport and catabolism	peroxidase 4 [Populus trichocarpa]
gene-POPTR_015G145300	TPP2	1.73929	1.565	1.96521	8.18552	8.25473	9.15527	7.18573e-131	2.32567	up	[O]	Posttranslational modification, protein turnover, chaperones	Molecular Function: serine-type endopeptidase activity (GO:0004252);; Molecular Function: tripeptidyl-peptidase activity (GO:0008240);;	K01280|0.0e+00|pop:7474052|K01280 tripeptidyl-peptidase II [EC:3.4.14.10] | (RefSeq) tripeptidyl-peptidase 2 isoform X1	--	[O]	Posttranslational modification, protein turnover, chaperones	Tripeptidyl peptidase II	Tripeptidyl-peptidase 2 OS=Arabidopsis thaliana OX=3702 GN=TPP2 PE=1 SV=1	O	Posttranslational modification, protein turnover, chaperones	tripeptidyl-peptidase 2 isoform X1 [Populus trichocarpa]
gene-POPTR_006G069100	--	1.22816	1.08974	1.26757	5.17967	6.34466	5.98137	5.05102e-30	2.27804	up	--	--	--	--	--	--	--	--	--	--	--	uncharacterized protein LOC7485475 isoform X1 [Populus trichocarpa]
gene-POPTR_008G143450	MAA3	0.155064	0.282883	0.254331	0.390798	0.498859	0.530402	3.81147e-06	1.06945	up	[R]	General function prediction only	Molecular Function: ATP binding (GO:0005524);;	K10706|0.0e+00|vvi:100855072|K10706 senataxin [EC:3.6.4.-] | (RefSeq) uncharacterized LOC100855072	--	[A]	RNA processing and modification	AAA domain	Probable helicase MAGATAMA 3 OS=Arabidopsis thaliana OX=3702 GN=MAA3 PE=2 SV=1	A	RNA processing and modification	uncharacterized protein LOC7471462 [Populus trichocarpa]
gene-POPTR_002G079400	AAP3	52.6138	57.2131	57.4163	131.696	137.241	130.19	2.71587e-151	1.31335	up	--	--	Cellular Component: integral component of membrane (GO:0016021);;	K14209|4.0e-10|pmum:103340311|K14209 solute carrier family 36 (proton-coupled amino acid transporter) | (RefSeq) amino acid transporter ANTL1	--	[E]	Amino acid transport and metabolism	Transmembrane amino acid transporter protein	Amino acid permease 3 OS=Arabidopsis thaliana OX=3702 GN=AAP3 PE=1 SV=2	E	Amino acid transport and metabolism	hypothetical protein POPTR_002G079400 [Populus trichocarpa]
gene-POPTR_003G062200	At1g15400	5.55193	7.17226	6.52077	17.3191	14.9962	17.1058	2.57211e-30	1.40516	up	--	--	--	K00326|6.3e-08|ccav:112516820|K00326 cytochrome-b5 reductase [EC:1.6.2.2] | (RefSeq) NADH-cytochrome b5 reductase-like protein	Amino sugar and nucleotide sugar metabolism (ko00520)	--	--	Domain of unknown function (DUF4666)	Uncharacterized protein At1g15400 OS=Arabidopsis thaliana OX=3702 GN=At1g15400 PE=1 SV=2	S	Function unknown	uncharacterized protein At1g15400 [Populus trichocarpa]
gene-POPTR_019G032600	--	1.72067	1.53893	1.6006	3.72605	3.75237	3.49886	5.90254e-15	1.21314	up	[T]	Signal transduction mechanisms	Molecular Function: magnesium ion binding (GO:0000287);; Molecular Function: pyruvate kinase activity (GO:0004743);; Cellular Component: cytoplasm (GO:0005737);; Biological Process: glycolytic process (GO:0006096);; Molecular Function: kinase activity (GO:0016301);; Molecular Function: potassium ion binding (GO:0030955);;	K00873|1.9e-289|pop:7469870|K00873 pyruvate kinase [EC:2.7.1.40] | (RefSeq) pyruvate kinase, cytosolic isozyme	Glycolysis / Gluconeogenesis (ko00010);; Purine metabolism (ko00230);; Pyruvate metabolism (ko00620);; Carbon metabolism (ko01200);; Biosynthesis of amino acids (ko01230)	[G]	Carbohydrate transport and metabolism	Pyruvate kinase, barrel domain	Pyruvate kinase, cytosolic isozyme OS=Nicotiana tabacum OX=4097 PE=2 SV=1	G	Carbohydrate transport and metabolism	pyruvate kinase, cytosolic isozyme [Populus trichocarpa]
gene-POPTR_002G217600	At2g05160	0.848263	0.931012	1.13982	2.31764	3.33845	3.30348	7.57509e-19	1.6555	up	--	--	Molecular Function: RNA binding (GO:0003723);; Molecular Function: metal ion binding (GO:0046872);;	--	--	--	--	OST-HTH/LOTUS domain	Zinc finger CCCH domain-containing protein 18 OS=Arabidopsis thaliana OX=3702 GN=At2g05160 PE=2 SV=1	A	RNA processing and modification	zinc finger CCCH domain-containing protein 18 isoform X3 [Populus trichocarpa]
gene-POPTR_018G026400	KEG	39.3828	40.4533	41.0585	90.5958	97.4499	88.7069	3.02963e-137	1.22761	up	[T]	Signal transduction mechanisms	Molecular Function: protein kinase activity (GO:0004672);; Molecular Function: ATP binding (GO:0005524);; Cellular Component: integral component of membrane (GO:0016021);;	K16279|1.8e-39|cann:107856815|K16279 E3 ubiquitin-protein ligase KEG [EC:2.7.11.1 2.3.2.27] | (RefSeq) E3 ubiquitin-protein ligase KEG	--	[T]	Signal transduction mechanisms	Protein tyrosine and serine/threonine kinase	E3 ubiquitin-protein ligase KEG OS=Arabidopsis thaliana OX=3702 GN=KEG PE=1 SV=2	T	Signal transduction mechanisms	uncharacterized protein LOC7465391 isoform X2 [Populus trichocarpa]
gene-POPTR_008G176132	NUP54	2.88344	4.93685	2.71908	6.51532	8.18482	8.12112	9.13148e-06	1.13044	up	--	--	Cellular Component: nuclear pore (GO:0005643);;	K14308|1.7e-73|pop:18101625|K14308 nuclear pore complex protein Nup54 | (RefSeq) nuclear pore complex protein NUP54	RNA transport (ko03013)	[YU]	Nuclear structure;; Intracellular trafficking, secretion, and vesicular transport	Nucleoporin complex subunit 54	Nuclear pore complex protein NUP54 OS=Arabidopsis thaliana OX=3702 GN=NUP54 PE=1 SV=1	--	--	hypothetical protein POPTR_008G176132 [Populus trichocarpa]
gene-POPTR_008G121900	PHOS34	3.77937	3.41452	4.69341	11.4154	14.5609	12.2508	1.76009e-40	1.72794	up	[T]	Signal transduction mechanisms	Molecular Function: nucleotide binding (GO:0000166);; Molecular Function: molecular_function (GO:0003674);; Molecular Function: binding (GO:0005488);; Cellular Component: cellular_component (GO:0005575);; Cellular Component: cell (GO:0005623);; Cellular Component: plasma membrane (GO:0005886);; Molecular Function: drug binding (GO:0008144);; Cellular Component: membrane (GO:0016020);; Molecular F…	--	--	--	--	Universal stress protein family	Universal stress protein PHOS34 OS=Arabidopsis thaliana OX=3702 GN=PHOS34 PE=1 SV=1	T	Signal transduction mechanisms	universal stress protein A-like protein [Populus trichocarpa]
gene-POPTR_017G152300	--	1.32486	1.64245	1.07089	3.36944	3.28369	2.46912	5.37207e-05	1.18648	up	--	--	--	--	--	--	--	--	--	--	--	hypothetical protein POPTR_017G152300 [Populus trichocarpa]
gene-POPTR_017G032200	INT1	5.77753	5.23302	6.28126	15.4677	17.731	17.2969	1.73652e-74	1.59488	up	[G]	Carbohydrate transport and metabolism	Cellular Component: integral component of membrane (GO:0016021);; Molecular Function: transmembrane transporter activity (GO:0022857);;	K08150|2.9e-282|pop:18106938|K08150 MFS transporter, SP family, solute carrier family 2 (myo-inositol transporter), member 13 | (RefSeq) inositol transporter 1 isoform X1	--	[R]	General function prediction only	Sugar (and other) transporter	Inositol transporter 1 OS=Arabidopsis thaliana OX=3702 GN=INT1 PE=1 SV=1	U	Intracellular trafficking, secretion, and vesicular transport	inositol transporter 1 isoform X1 [Populus trichocarpa]
gene-POPTR_T080032	SULTR2;1	0.335464	0.272193	0.270816	0.771635	0.503533	0.952609	7.13838e-05	1.31835	up	[P]	Inorganic ion transport and metabolism	Molecular Function: secondary active sulfate transmembrane transporter activity (GO:0008271);; Cellular Component: integral component of membrane (GO:0016021);;	K17469|6.1e-147|pop:112328192|K17469 sulfate transporter 2, low-affinity | (RefSeq) sulfate transporter 2.1-like	--	[P]	Inorganic ion transport and metabolism	Sulfate permease family	Sulfate transporter 2.1 OS=Arabidopsis thaliana OX=3702 GN=SULTR2;1 PE=2 SV=1	P	Inorganic ion transport and metabolism	hypothetical protein POPTR_T080032 [Populus trichocarpa]
gene-POPTR_010G100032	--	45.2642	36.8213	46.8274	212.577	214.203	181.469	1.35184e-90	2.2805	up	--	--	--	--	--	--	--	--	--	--	--	hypothetical protein POPTR_010G100032 [Populus trichocarpa]
gene-POPTR_009G110400	--	1.44172	1.18307	1.47446	2.91109	2.68751	2.93386	7.42351e-10	1.09721	up	--	--	Molecular Function: molecular_function (GO:0003674);; Molecular Function: nucleic acid binding (GO:0003676);; Molecular Function: RNA binding (GO:0003723);; Molecular Function: catalytic activity (GO:0003824);; Molecular Function: nuclease activity (GO:0004518);; Molecular Function: endonuclease activity (GO:0004519);; Molecular Function: binding (GO:0005488);; Cellular Component: cellular_compon…	--	--	--	--	PPR repeat family	--	S	Function unknown	hypothetical protein POPTR_009G110400 [Populus trichocarpa]
gene-POPTR_004G005700	At5g63520	0.229212	0.122713	0.188261	0.960014	1.01312	0.758828	3.68661e-10	2.21563	up	--	--	Biological Process: protein polyubiquitination (GO:0000209);; Biological Process: positive regulation of proteasomal ubiquitin-dependent protein catabolic process (GO:0032436);;	--	--	--	--	FIST C domain	F-box/LRR-repeat protein At5g63520 OS=Arabidopsis thaliana OX=3702 GN=At5g63520 PE=2 SV=1	S	Function unknown	hypothetical protein POPTR_004G005700 [Populus trichocarpa]
gene-POPTR_010G041200	AMSH2	5.72659	5.85404	5.41058	25.5017	26.9668	24.0561	1.37644e-160	2.16033	up	--	--	Molecular Function: protein binding (GO:0005515);; Biological Process: cellular protein modification process (GO:0006464);; Biological Process: proteolysis (GO:0006508);; Biological Process: nitrogen compound metabolic process (GO:0006807);; Biological Process: biological_process (GO:0008150);; Biological Process: metabolic process (GO:0008152);; Biological Process: cellular process (GO:0009987);…	K11866|5.2e-74|pop:7492397|K11866 STAM-binding protein [EC:3.4.19.12] | (RefSeq) AMSH-like ubiquitin thioesterase 2 isoform X1	Endocytosis (ko04144)	[T]	Signal transduction mechanisms	JAB1/Mov34/MPN/PAD-1 ubiquitin protease	AMSH-like ubiquitin thioesterase 2 OS=Arabidopsis thaliana OX=3702 GN=AMSH2 PE=2 SV=1	T	Signal transduction mechanisms	hypothetical protein POPTR_010G041200 [Populus trichocarpa]
gene-POPTR_003G200200	RPPL1	0.323238	0.337138	0.308844	0.659651	0.881019	0.707482	1.85937e-06	1.22898	up	[R]	General function prediction only	Molecular Function: ADP binding (GO:0043531);;	K12818|2.1e-131|mtr:MTR_0267s0070|K12818 ATP-dependent RNA helicase DHX8/PRP22 [EC:3.6.4.13] | (RefSeq) NB-ARC domain disease resistance protein, putative	Spliceosome (ko03040)	[T]	Signal transduction mechanisms	NB-ARC domain	Putative disease resistance RPP13-like protein 1 OS=Arabidopsis thaliana OX=3702 GN=RPPL1 PE=3 SV=1	T	Signal transduction mechanisms	NBS-LRR type disease resistance protein [Populus trichocarpa]
gene-POPTR_T031100	--	0.782084	0.527489	0.706906	4.24818	3.87178	3.30267	8.92924e-16	2.45433	up	--	--	--	--	--	--	--	--	--	S	Function unknown	hypothetical protein POPTR_T031100 [Populus trichocarpa]
gene-POPTR_006G064900	At5g20260	14.6022	14.9389	14.2258	27.7879	33.6192	32.7262	4.11556e-49	1.15444	up	--	--	Biological Process: protein glycosylation (GO:0006486);; Molecular Function: transferase activity, transferring glycosyl groups (GO:0016757);;	K18789|9.9e-291|pop:7474670|K18789 xylogalacturonan beta-1,3-xylosyltransferase [EC:2.4.2.41] | (RefSeq) probable glycosyltransferase At5g20260 isoform X1	--	[GMW]	Carbohydrate transport and metabolism;; Cell wall/membrane/envelope biogenesis;; Extracellular structures	Exostosin family	Probable glycosyltransferase At5g20260 OS=Arabidopsis thaliana OX=3702 GN=At5g20260 PE=3 SV=3	--	--	probable glycosyltransferase At5g20260 isoform X1 [Populus trichocarpa]
gene-POPTR_019G064600	CYP714A1	1.39825	1.6975	1.29233	3.88773	4.59701	5.86805	1.03998e-16	1.49556	up	[QV]	Secondary metabolites biosynthesis, transport and catabolism;; Defense mechanisms	Molecular Function: monooxygenase activity (GO:0004497);; Molecular Function: iron ion binding (GO:0005506);; Cellular Component: integral component of membrane (GO:0016021);; Molecular Function: oxidoreductase activity, acting on paired donors, with incorporation or reduction of molecular oxygen (GO:0016705);; Molecular Function: heme binding (GO:0020037);;	K20661|2.7e-222|cic:CICLE_v10031065mg|K20661 cytochrome P450 family 714 subfamily A polypeptide 1 | (RefSeq) hypothetical protein	--	[QI]	Secondary metabolites biosynthesis, transport and catabolism;; Lipid transport and metabolism	Cytochrome P450	Cytochrome P450 714A1 OS=Arabidopsis thaliana OX=3702 GN=CYP714A1 PE=2 SV=1	Q	Secondary metabolites biosynthesis, transport and catabolism	cytochrome P450 714A1-like [Populus trichocarpa]
gene-POPTR_006G134300	LKR/SDH	2.73866	2.98101	3.06951	24.0778	24.9891	24.4928	0	3.09671	up	[E]	Amino acid transport and metabolism	Cellular Component: integral component of membrane (GO:0016021);; Molecular Function: oxidoreductase activity (GO:0016491);;	K14157|0.0e+00|pop:18100260|K14157 alpha-aminoadipic semialdehyde synthase [EC:1.5.1.8 1.5.1.9] | (RefSeq) alpha-aminoadipic semialdehyde synthase isoform X1	Lysine degradation (ko00310)	[E]	Amino acid transport and metabolism	Saccharopine dehydrogenase C-terminal domain	Alpha-aminoadipic semialdehyde synthase OS=Arabidopsis thaliana OX=3702 GN=LKR/SDH PE=1 SV=1	E	Amino acid transport and metabolism	alpha-aminoadipic semialdehyde synthase isoform X1 [Populus trichocarpa]
gene-POPTR_002G208700	GRXS6	0.391174	1.05736	0.799092	26.2982	25.7745	16.9359	1.32014e-35	4.70445	up	--	--	Molecular Function: arsenate reductase (glutaredoxin) activity (GO:0008794);; Molecular Function: electron carrier activity (GO:0009055);; Molecular Function: protein disulfide oxidoreductase activity (GO:0015035);;	K03676|3.4e-52|pop:18111306|K03676 glutaredoxin 3 | (RefSeq) monothiol glutaredoxin-S6	--	[O]	Posttranslational modification, protein turnover, chaperones	Glutaredoxin	Monothiol glutaredoxin-S6 OS=Arabidopsis thaliana OX=3702 GN=GRXS6 PE=3 SV=1	O	Posttranslational modification, protein turnover, chaperones	monothiol glutaredoxin-S6 [Populus trichocarpa]
gene-POPTR_016G071800	SMXL3	2.16256	2.74755	2.72482	4.75959	5.06944	5.59301	9.07837e-18	1.06101	up	[O]	Posttranslational modification, protein turnover, chaperones	Biological Process: response to reactive oxygen species (GO:0000302);; Cellular Component: cellular_component (GO:0005575);; Cellular Component: intracellular (GO:0005622);; Cellular Component: cell (GO:0005623);; Cellular Component: cytoplasm (GO:0005737);; Biological Process: regulation of translation (GO:0006417);; Biological Process: response to stress (GO:0006950);; Biological Process: respo…	K03695|8.1e-22|ini:109162853|K03695 ATP-dependent Clp protease ATP-binding subunit ClpB | (RefSeq) chaperone protein ClpB1-like	--	[O]	Posttranslational modification, protein turnover, chaperones	Clp amino terminal domain, pathogenicity island component	Protein SMAX1-LIKE 3 OS=Arabidopsis thaliana OX=3702 GN=SMXL3 PE=2 SV=1	O	Posttranslational modification, protein turnover, chaperones	protein SMAX1-LIKE 3 [Populus trichocarpa]
gene-POPTR_002G124000	RAP2-1	0.729566	0.796954	0.653909	4.83706	3.74506	4.1712	2.75353e-45	2.55518	up	--	--	Molecular Function: DNA binding (GO:0003677);; Molecular Function: transcription factor activity, sequence-specific DNA binding (GO:0003700);; Cellular Component: nucleus (GO:0005634);;	K09286|1.2e-85|pop:7462867|K09286 EREBP-like factor | (RefSeq) ethylene-responsive transcription factor RAP2-1	--	--	--	AP2 domain	Ethylene-responsive transcription factor RAP2-1 OS=Arabidopsis thaliana OX=3702 GN=RAP2-1 PE=2 SV=1	K	Transcription	ethylene-responsive transcription factor RAP2-1 [Populus trichocarpa]
gene-POPTR_014G043100	CYP734A1	8.57353	6.7865	8.25435	29.1617	24.3814	27.3204	5.36108e-81	1.82263	up	[QV]	Secondary metabolites biosynthesis, transport and catabolism;; Defense mechanisms	Molecular Function: monooxygenase activity (GO:0004497);; Molecular Function: iron ion binding (GO:0005506);; Molecular Function: oxidoreductase activity, acting on paired donors, with incorporation or reduction of molecular oxygen (GO:0016705);; Molecular Function: heme binding (GO:0020037);;	K15639|1.5e-113|mesc:110631173|K15639 PHYB activation tagged suppressor 1 [EC:1.14.-.-] | (RefSeq) cytochrome P450 734A1-like	Brassinosteroid biosynthesis (ko00905)	[QI]	Secondary metabolites biosynthesis, transport and catabolism;; Lipid transport and metabolism	Cytochrome P450	Cytochrome P450 734A1 OS=Arabidopsis thaliana OX=3702 GN=CYP734A1 PE=2 SV=1	--	--	cytochrome P450 734A1 [Populus trichocarpa]
gene-POPTR_002G154000	NTL9	0.619916	0.601788	0.6378	3.46718	3.60786	3.76384	1.23587e-45	2.55371	up	--	--	Molecular Function: DNA binding (GO:0003677);; Cellular Component: nucleus (GO:0005634);; Biological Process: regulation of transcription, DNA-templated (GO:0006355);;	K00521|7.5e-19|cmos:111447866|K00521 ferric-chelate reductase [EC:1.16.1.7] | (RefSeq) ferric reduction oxidase 7, chloroplastic-like	--	--	--	No apical meristem (NAM) protein	Protein NTM1-like 9 OS=Arabidopsis thaliana OX=3702 GN=NTL9 PE=1 SV=1	G	Carbohydrate transport and metabolism	NAC domain-containing protein 14 [Populus trichocarpa]
gene-POPTR_013G159800	At3g08620	5.02129	4.54738	5.16673	9.37011	9.87602	9.46486	1.67765e-27	1.01174	up	--	--	Molecular Function: RNA binding (GO:0003723);;	K14945|6.0e-160|pop:7464745|K14945 protein quaking | (RefSeq) KH domain-containing protein At3g08620 isoform X1	--	[A]	RNA processing and modification	Homodimerisation region of STAR domain protein	KH domain-containing protein At3g08620 OS=Arabidopsis thaliana OX=3702 GN=At3g08620 PE=2 SV=1	A	RNA processing and modification	KH domain-containing protein At3g08620 isoform X1 [Populus trichocarpa]
gene-POPTR_006G232700	At5g26010	2.5476	1.86224	2.28246	5.02392	4.9646	4.6217	1.37359e-13	1.16483	up	--	--	Molecular Function: protein serine/threonine phosphatase activity (GO:0004722);; Molecular Function: magnesium-dependent protein serine/threonine phosphatase activity (GO:0004724);;	K14497|6.2e-26|bdi:100838998|K14497 protein phosphatase 2C [EC:3.1.3.16] | (RefSeq) probable protein phosphatase 2C 8	MAPK signaling pathway - plant (ko04016);; Plant hormone signal transduction (ko04075)	[T]	Signal transduction mechanisms	Protein phosphatase 2C	Probable protein phosphatase 2C 72 OS=Arabidopsis thaliana OX=3702 GN=At5g26010 PE=2 SV=2	T	Signal transduction mechanisms	probable protein phosphatase 2C 72 [Populus trichocarpa]
gene-POPTR_006G066600	IAA11	1.02628	1.10697	0.806588	3.48145	3.73101	3.80983	3.37912e-22	1.91463	up	--	--	Cellular Component: nucleus (GO:0005634);; Biological Process: regulation of transcription, DNA-templated (GO:0006355);; Biological Process: auxin-activated signaling pathway (GO:0009734);;	K14484|1.2e-134|pop:7474682|K14484 auxin-responsive protein IAA | (RefSeq) auxin-responsive protein IAA29	Plant hormone signal transduction (ko04075)	--	--	AUX/IAA family	Auxin-responsive protein IAA11 OS=Arabidopsis thaliana OX=3702 GN=IAA11 PE=1 SV=1	K	Transcription	auxin-responsive protein IAA29 [Populus trichocarpa]
gene-POPTR_001G375700	IQD1	1.24991	1.33635	1.32727	12.5549	14.1287	13.7835	2.46441e-165	3.39796	up	--	--	Molecular Function: molecular_function (GO:0003674);; Molecular Function: binding (GO:0005488);; Molecular Function: protein binding (GO:0005515);; Cellular Component: cellular_component (GO:0005575);; Cellular Component: intracellular (GO:0005622);; Cellular Component: cell (GO:0005623);; Cellular Component: nucleus (GO:0005634);; Cellular Component: cytoskeleton (GO:0005856);; Cellular Componen…	--	--	--	--	--	Protein IQ-DOMAIN 1 OS=Arabidopsis thaliana OX=3702 GN=IQD1 PE=1 SV=1	S	Function unknown	protein IQ-DOMAIN 1 [Populus trichocarpa]
gene-POPTR_009G129200	--	3.64087	3.70219	2.18972	14.8891	15.7803	19.2493	4.15462e-43	2.39887	up	--	--	--	--	--	--	--	--	--	--	--	hypothetical protein POPTR_009G129200 [Populus trichocarpa]
gene-POPTR_006G096800	NPF8.1	1.2026	1.36494	1.48883	4.70521	4.12639	4.78499	3.28874e-35	1.78541	up	[E]	Amino acid transport and metabolism	Molecular Function: peptide:proton symporter activity (GO:0015333);; Cellular Component: integral component of membrane (GO:0016021);; Molecular Function: oligopeptide transmembrane transporter activity (GO:0035673);; Molecular Function: tripeptide transporter activity (GO:0042937);; Molecular Function: peptide transmembrane transporter activity (GO:1904680);;	K14638|0.0e+00|pop:7487298|K14638 solute carrier family 15 (peptide/histidine transporter), member 3/4 | (RefSeq) protein NRT1/ PTR FAMILY 8.1 isoform X1	--	[E]	Amino acid transport and metabolism	POT family	Protein NRT1/ PTR FAMILY 8.1 OS=Arabidopsis thaliana OX=3702 GN=NPF8.1 PE=1 SV=1	E	Amino acid transport and metabolism	protein NRT1/ PTR FAMILY 8.1 isoform X1 [Populus trichocarpa]
gene-POPTR_016G042400	--	3.64296	3.127	2.39571	5.77775	5.85426	6.29013	1.78465e-10	1.00577	up	--	--	--	--	--	--	--	--	--	--	--	uncharacterized protein LOC7483962 [Populus trichocarpa]
gene-POPTR_001G299300	BHLH113	0.389545	0.573527	0.21325	1.514	1.4494	1.14809	1.8598e-08	1.76607	up	--	--	Molecular Function: transcriptional activator activity, RNA polymerase II transcription regulatory region sequence-specific binding (GO:0001228);; Cellular Component: nucleus (GO:0005634);; Molecular Function: protein dimerization activity (GO:0046983);;	K05765|6.6e-12|gra:105781290|K05765 cofilin | (RefSeq) uncharacterized LOC105781290	--	--	--	--	Transcription factor bHLH113 OS=Arabidopsis thaliana OX=3702 GN=BHLH113 PE=2 SV=1	K	Transcription	transcription factor bHLH113 [Populus trichocarpa]
gene-POPTR_009G041700	SR45A	4.5334	4.38442	4.37746	9.96578	11.2008	11.3204	1.95682e-36	1.33494	up	[J]	Translation, ribosomal structure and biogenesis	Molecular Function: RNA binding (GO:0003723);; Cellular Component: nucleus (GO:0005634);; Cellular Component: spliceosomal complex (GO:0005681);; Biological Process: positive regulation of mRNA splicing, via spliceosome (GO:0048026);; Biological Process: regulation of RNA metabolic process (GO:0051252);; Cellular Component: ribonucleoprotein complex (GO:1990904);;	K12897|3.1e-39|pop:7458189|K12897 transformer-2 protein | (RefSeq) serine/arginine-rich splicing factor SR45a	Spliceosome (ko03040)	[K]	Transcription	RNA recognition motif. (a.k.a. RRM, RBD, or RNP domain)	Serine/arginine-rich splicing factor SR45a OS=Arabidopsis thaliana OX=3702 GN=SR45A PE=1 SV=1	A	RNA processing and modification	serine/arginine-rich splicing factor SR45a isoform X1 [Populus trichocarpa]
gene-POPTR_005G084200	SEP2	0.106908	0	0.191821	0.752707	0.990941	1.25259	2.11126e-09	3.01792	up	--	--	Cellular Component: integral component of membrane (GO:0016021);;	--	--	--	--	Chlorophyll A-B binding protein	Stress enhanced protein 2, chloroplastic OS=Arabidopsis thaliana OX=3702 GN=SEP2 PE=2 SV=1	S	Function unknown	stress enhanced protein 2, chloroplastic [Populus trichocarpa]
gene-POPTR_015G144200	HIPP39	14.1961	12.5583	12.6642	29.4701	30.2923	31.4037	2.50722e-50	1.27004	up	--	--	Biological Process: metal ion transport (GO:0030001);; Molecular Function: metal ion binding (GO:0046872);;	K11883|5.0e-16|nau:109216591|K11883 RNA-binding protein NOB1 | (RefSeq) RNA-binding protein NOB1 isoform X1	Ribosome biogenesis in eukaryotes (ko03008)	[P]	Inorganic ion transport and metabolism	--	Heavy metal-associated isoprenylated plant protein 39 OS=Arabidopsis thaliana OX=3702 GN=HIPP39 PE=2 SV=1	P	Inorganic ion transport and metabolism	hypothetical protein POPTR_015G144200 [Populus trichocarpa]
gene-POPTR_019G032500	SIRP1	1.22364	1.25683	1.46402	13.4951	12.9982	12.9518	4.96974e-172	3.3583	up	--	--	Molecular Function: ubiquitin protein ligase activity (GO:0061630);;	K11982|1.5e-194|pop:7469869|K11982 E3 ubiquitin-protein ligase RNF115/126 [EC:2.3.2.27] | (RefSeq) E3 ubiquitin-protein ligase SIRP1 isoform X1	--	[O]	Posttranslational modification, protein turnover, chaperones	Ring finger domain	E3 ubiquitin-protein ligase SIRP1 OS=Oryza sativa subsp. japonica OX=39947 GN=SIRP1 PE=1 SV=1	O	Posttranslational modification, protein turnover, chaperones	E3 ubiquitin-protein ligase SIRP1 isoform X1 [Populus trichocarpa]
gene-POPTR_010G118300	LRK10	0.883719	0.91947	0.741615	3.3341	3.42302	3.46052	3.35923e-37	2.03045	up	[M]	Cell wall/membrane/envelope biogenesis	Molecular Function: protein kinase activity (GO:0004672);; Molecular Function: ATP binding (GO:0005524);; Cellular Component: integral component of membrane (GO:0016021);; Molecular Function: polysaccharide binding (GO:0030247);;	K16224|3.4e-46|boe:106304564|K16224 senescence-induced receptor-like serine/threonine-protein kinase | (RefSeq) senescence-induced receptor-like serine/threonine-protein kinase	MAPK signaling pathway - plant (ko04016);; Plant-pathogen interaction (ko04626)	[T]	Signal transduction mechanisms	Protein tyrosine and serine/threonine kinase	Rust resistance kinase Lr10 OS=Triticum aestivum OX=4565 GN=LRK10 PE=2 SV=1	T	Signal transduction mechanisms	rust resistance kinase Lr10 [Populus trichocarpa]
gene-POPTR_014G183300	--	0.537581	0.933541	1.65899	3.31999	3.21737	2.55392	0.000411942	1.48415	up	--	--	--	--	--	--	--	--	--	--	--	hypothetical protein POPTR_014G183300 [Populus trichocarpa]
gene-POPTR_008G067400	--	15.0455	17.1429	13.2425	41.6487	41.9746	40.0365	6.33739e-79	1.35565	up	--	--	Molecular Function: DNA binding (GO:0003677);; Cellular Component: nucleus (GO:0005634);;	K10802|8.5e-56|pop:7474442|K10802 high mobility group protein B1 | (RefSeq) high mobility group B protein 1	Base excision repair (ko03410)	[R]	General function prediction only	HMG (high mobility group) box	HMG1/2-like protein OS=Glycine max OX=3847 PE=2 SV=1	K	Transcription	high mobility group B protein 1 [Populus trichocarpa]
gene-POPTR_006G033201	CYS6	18.8935	17.3755	17.3212	49.2269	52.6265	48.6102	6.82673e-89	1.53764	up	--	--	Molecular Function: cysteine-type endopeptidase inhibitor activity (GO:0004869);;	K13899|5.8e-07|bvg:104889768|K13899 cystatin-C | (RefSeq) cysteine proteinase inhibitor B	--	--	--	Aspartic acid proteinase inhibitor	Cysteine proteinase inhibitor 6 OS=Arabidopsis thaliana OX=3702 GN=CYS6 PE=1 SV=2	G	Carbohydrate transport and metabolism	cysteine proteinase inhibitor A [Populus trichocarpa]
gene-POPTR_015G037000	--	7.09419	7.35083	7.49523	18.902	23.0193	20.5965	4.28723e-112	1.5604	up	[S]	Function unknown	Cellular Component: nucleus (GO:0005634);; Biological Process: carbohydrate metabolic process (GO:0005975);; Molecular Function: zinc ion binding (GO:0008270);; Molecular Function: oxidoreductase activity (GO:0016491);; Molecular Function: aldehyde-lyase activity (GO:0016832);; Molecular Function: NADP binding (GO:0050661);; Molecular Function: NAD binding (GO:0051287);;	K00020|9.5e-57|qsu:111987869|K00020 3-hydroxyisobutyrate dehydrogenase [EC:1.1.1.31] | (RefSeq) uncharacterized protein LOC111987869	Valine, leucine and isoleucine degradation (ko00280)	[R]	General function prediction only	Fructose-bisphosphate aldolase class-II	--	G	Carbohydrate transport and metabolism	uncharacterized protein LOC7474828 isoform X1 [Populus trichocarpa]
gene-POPTR_006G155200	EFM	1.47629	1.15944	1.4689	3.66397	4.88627	4.87343	3.20879e-24	1.73539	up	--	--	Molecular Function: DNA binding (GO:0003677);; Cellular Component: nucleus (GO:0005634);;	K14491|2.9e-10|pda:103712502|K14491 two-component response regulator ARR-B family | (RefSeq) two-component response regulator ORR26-like isoform X1	Plant hormone signal transduction (ko04075)	--	--	Myb-like DNA-binding domain	Myb family transcription factor EFM OS=Arabidopsis thaliana OX=3702 GN=EFM PE=1 SV=2	K	Transcription	myb family transcription factor EFM [Populus trichocarpa]
gene-POPTR_008G113800	--	1.96848	1.32621	1.34217	7.25712	5.47462	5.87381	1.08234e-21	2.01466	up	--	--	--	--	--	--	--	--	--	--	--	hypothetical protein POPTR_008G113800 [Populus trichocarpa]
gene-POPTR_009G032800	SCL14	1.58803	1.72461	1.70137	3.8178	3.39015	3.46837	3.39439e-20	1.1345	up	--	--	Molecular Function: transcription factor activity, sequence-specific DNA binding (GO:0003700);; Cellular Component: nucleus (GO:0005634);; Biological Process: regulation of transcription, DNA-templated (GO:0006355);; Biological Process: response to chitin (GO:0010200);; Molecular Function: sequence-specific DNA binding (GO:0043565);;	K14494|3.3e-46|ppp:112275164|K14494 DELLA protein | (RefSeq) DELLA protein GAI-like	Plant hormone signal transduction (ko04075)	--	--	GRAS domain family	Scarecrow-like protein 14 OS=Arabidopsis thaliana OX=3702 GN=SCL14 PE=1 SV=2	K	Transcription	scarecrow-like protein 33 [Populus trichocarpa]
gene-POPTR_006G258900	FLOT4	0.40675	0.632562	0.477083	2.23275	2.32525	2.35987	5.19327e-21	2.18803	up	[S]	Function unknown	Cellular Component: caveola (GO:0005901);;	K07192|8.5e-194|pop:7489129|K07192 flotillin | (RefSeq) flotillin-like protein 4	--	[UZ]	Intracellular trafficking, secretion, and vesicular transport;; Cytoskeleton	SPFH domain / Band 7 family	Flotillin-like protein 4 OS=Medicago truncatula OX=3880 GN=FLOT4 PE=2 SV=1	--	--	flotillin-like protein 4 [Populus trichocarpa]
gene-POPTR_011G039800	PHOS32	15.3498	14.4294	16.2016	34.9666	32.5063	33.6037	3.56428e-66	1.21619	up	[T]	Signal transduction mechanisms	--	K13945|5.6e-13|pavi:110765302|K13945 LOB domain-containing protein 29 | (RefSeq) LOB domain-containing protein 29-like	--	--	--	Universal stress protein family	Universal stress protein PHOS32 OS=Arabidopsis thaliana OX=3702 GN=PHOS32 PE=1 SV=1	S	Function unknown	universal stress protein PHOS32 isoform X1 [Populus trichocarpa]
gene-POPTR_006G060300	FMO1	14.3902	13.1591	12.4796	47.1518	47.9838	43.844	1.62859e-156	1.84358	up	[P]	Inorganic ion transport and metabolism	Molecular Function: N,N-dimethylaniline monooxygenase activity (GO:0004499);; Molecular Function: flavin adenine dinucleotide binding (GO:0050660);; Molecular Function: NADP binding (GO:0050661);;	K11816|6.2e-17|mtr:MTR_7g107710|K11816 indole-3-pyruvate monooxygenase [EC:1.14.13.168] | (RefSeq) flavin-binding monooxygenase-like protein	Tryptophan metabolism (ko00380)	[Q]	Secondary metabolites biosynthesis, transport and catabolism	Flavin-binding monooxygenase-like	Probable flavin-containing monooxygenase 1 OS=Arabidopsis thaliana OX=3702 GN=FMO1 PE=2 SV=1	Q	Secondary metabolites biosynthesis, transport and catabolism	probable flavin-containing monooxygenase 1 [Populus trichocarpa]
gene-POPTR_010G065400	--	2.72967	3.37753	3.53574	7.22353	7.55282	6.67929	6.32335e-23	1.20234	up	--	--	Biological Process: RNA processing (GO:0006396);;	--	--	--	--	Tetratricopeptide repeat	--	--	--	hypothetical protein POPTR_010G065400 [Populus trichocarpa]
gene-POPTR_004G073900	GSVIVT00026920001	0.237164	0.196958	0.475665	2.10557	2.07879	1.59369	1.76228e-18	2.60841	up	[G]	Carbohydrate transport and metabolism	Molecular Function: polygalacturonase activity (GO:0004650);; Cellular Component: extracellular region (GO:0005576);; Biological Process: carbohydrate metabolic process (GO:0005975);; Biological Process: cell wall organization (GO:0071555);;	K01184|9.9e-30|gmx:100820332|K01184 polygalacturonase [EC:3.2.1.15] | (RefSeq) probable polygalacturonase At3g15720 isoform X1	Pentose and glucuronate interconversions (ko00040)	--	--	Glycosyl hydrolases family 28	Probable polygalacturonase OS=Vitis vinifera OX=29760 GN=GSVIVT00026920001 PE=1 SV=1	G	Carbohydrate transport and metabolism	probable polygalacturonase [Populus trichocarpa]
gene-POPTR_010G169400	ZHD11	4.04634	3.59582	3.69904	45.6504	43.868	44.3051	0	3.60266	up	--	--	Molecular Function: DNA binding (GO:0003677);;	K15777|1.1e-27|mesc:110630336|K15777 4,5-DOPA dioxygenase extradiol [EC:1.13.11.-] | (RefSeq) uncharacterized protein LOC110630336	Betalain biosynthesis (ko00965)	--	--	ZF-HD protein dimerisation region	Zinc-finger homeodomain protein 11 OS=Arabidopsis thaliana OX=3702 GN=ZHD11 PE=1 SV=1	K	Transcription	zinc-finger homeodomain protein 11 [Populus trichocarpa]
gene-POPTR_016G056400	At2g41710	3.24994	2.5201	2.9194	5.77939	5.98958	7.04219	7.02414e-25	1.22873	up	--	--	Molecular Function: DNA binding (GO:0003677);; Molecular Function: transcription factor activity, sequence-specific DNA binding (GO:0003700);; Cellular Component: nucleus (GO:0005634);;	K09285|3.1e-212|pop:7484017|K09285 AP2-like factor, ANT lineage | (RefSeq) AP2-like ethylene-responsive transcription factor At2g41710 isoform X1	--	--	--	AP2 domain	AP2-like ethylene-responsive transcription factor At2g41710 OS=Arabidopsis thaliana OX=3702 GN=At2g41710 PE=1 SV=2	K	Transcription	hypothetical protein POPTR_016G056400 [Populus trichocarpa]
gene-POPTR_014G069100	--	1.33598	0.777568	0.924943	2.8891	2.63618	2.79369	4.7895e-13	1.47305	up	--	--	--	K15198|7.1e-53|sbi:8069083|K15198 transcription factor TFIIIB component B'' | (RefSeq) uncharacterized protein LOC8069083 isoform X1	--	--	--	Myelodysplasia-myeloid leukemia factor 1-interacting protein	--	S	Function unknown	uncharacterized protein LOC7464857 isoform X1 [Populus trichocarpa]
gene-POPTR_010G093400	ATHB-13	62.7424	55.1707	61.3043	154.888	150.875	146.995	1.82064e-149	1.3871	up	--	--	Cellular Component: nucleus (GO:0005634);; Molecular Function: sequence-specific DNA binding (GO:0043565);; Biological Process: positive regulation of transcription, DNA-templated (GO:0045893);;	K09338|1.8e-144|pop:7459046|K09338 homeobox-leucine zipper protein | (RefSeq) homeobox-leucine zipper protein ATHB-13 isoform X2	--	[K]	Transcription	Homeobox associated leucine zipper	Homeobox-leucine zipper protein ATHB-13 OS=Arabidopsis thaliana OX=3702 GN=ATHB-13 PE=2 SV=2	K	Transcription	homeobox-leucine zipper protein ATHB-13 isoform X1 [Populus trichocarpa]
gene-POPTR_013G008300	--	20.7612	20.4703	22.7901	50.4128	50.9458	48.7186	1.38311e-124	1.28145	up	--	--	Biological Process: chromatin remodeling (GO:0006338);; Cellular Component: Ino80 complex (GO:0031011);;	K11666|3.4e-300|pop:7478896|K11666 INO80 complex subunit B | (RefSeq) uncharacterized protein LOC7478896 isoform X2	--	--	--	PAPA-1-like conserved region	--	S	Function unknown	uncharacterized protein LOC7478896 isoform X2 [Populus trichocarpa]
gene-POPTR_014G103100	--	1.98259	0.84409	1.62605	3.09653	3.16909	2.68528	0.000256366	1.02521	up	--	--	Cellular Component: integral component of membrane (GO:0016021);;	--	--	--	--	--	--	--	--	hypothetical protein POPTR_014G103100 [Populus trichocarpa]
gene-POPTR_015G086800	SOBIR1	3.31856	4.1115	5.00071	11.254	8.59906	8.45446	5.38636e-19	1.23406	up	[T]	Signal transduction mechanisms	Molecular Function: protein serine/threonine kinase activity (GO:0004674);; Molecular Function: ATP binding (GO:0005524);; Cellular Component: plasma membrane (GO:0005886);; Cellular Component: integral component of membrane (GO:0016021);; Biological Process: protein autophosphorylation (GO:0046777);;	K13415|1.3e-56|pda:103720660|K13415 protein brassinosteroid insensitive 1 [EC:2.7.10.1 2.7.11.1] | (RefSeq) brassinosteroid LRR receptor kinase BRI1-like	Plant hormone signal transduction (ko04075)	--	--	Protein kinase domain	Leucine-rich repeat receptor-like serine/threonine/tyrosine-protein kinase SOBIR1 OS=Arabidopsis thaliana OX=3702 GN=SOBIR1 PE=1 SV=1	T	Signal transduction mechanisms	leucine-rich repeat receptor-like serine/threonine/tyrosine-protein kinase SOBIR1 [Populus trichocarpa]
gene-POPTR_T023500	At4g27290	0.317067	0.284253	0.316947	1.20229	1.26025	1.14196	7.04988e-18	1.97679	up	[T]	Signal transduction mechanisms	Molecular Function: protein serine/threonine kinase activity (GO:0004674);; Molecular Function: ATP binding (GO:0005524);; Cellular Component: plasma membrane (GO:0005886);; Biological Process: protein phosphorylation (GO:0006468);; Cellular Component: integral component of membrane (GO:0016021);; Molecular Function: ubiquitin protein ligase binding (GO:0031625);; Biological Process: recognition …	K24104|3.8e-77|thj:104799061|K24104 GPN-loop GTPase | (RefSeq) LOW QUALITY PROTEIN: uncharacterized protein LOC104799061	--	--	--	Protein tyrosine and serine/threonine kinase	G-type lectin S-receptor-like serine/threonine-protein kinase At4g27290 OS=Arabidopsis thaliana OX=3702 GN=At4g27290 PE=3 SV=4	T	Signal transduction mechanisms	G-type lectin S-receptor-like serine/threonine-protein kinase At4g27290 [Populus trichocarpa]
gene-POPTR_008G004300	APUM5	15.9026	17.1838	19.2041	35.6494	33.5042	33.8826	2.78173e-58	1.03146	up	--	--	Molecular Function: mRNA binding (GO:0003729);; Cellular Component: cytoplasm (GO:0005737);; Biological Process: posttranscriptional regulation of gene expression (GO:0010608);; Biological Process: 3'-UTR-mediated mRNA destabilization (GO:0061158);;	K03283|5.1e-12|peq:110019053|K03283 heat shock 70kDa protein 1/2/6/8 | (RefSeq) LOW QUALITY PROTEIN: stromal 70 kDa heat shock-related protein, chloroplastic-like	Spliceosome (ko03040);; Protein processing in endoplasmic reticulum (ko04141);; Endocytosis (ko04144)	[J]	Translation, ribosomal structure and biogenesis	Pumilio-family RNA binding repeat	Pumilio homolog 5 OS=Arabidopsis thaliana OX=3702 GN=APUM5 PE=1 SV=2	J	Translation, ribosomal structure and biogenesis	pumilio homolog 5 [Populus trichocarpa]
gene-POPTR_001G471100	CML21	15.582	13.3647	14.2764	30.693	30.0737	28.627	1.85945e-45	1.09793	up	--	--	Molecular Function: calcium ion binding (GO:0005509);;	K13448|5.4e-127|pop:7457666|K13448 calcium-binding protein CML | (RefSeq) probable calcium-binding protein CML21 isoform X1	Plant-pathogen interaction (ko04626)	[T]	Signal transduction mechanisms	EF hand	Probable calcium-binding protein CML21 OS=Arabidopsis thaliana OX=3702 GN=CML21 PE=2 SV=1	T	Signal transduction mechanisms	probable calcium-binding protein CML21 isoform X1 [Populus trichocarpa]
gene-POPTR_019G131300	PTI6	4.72105	5.1039	5.77067	35.5557	37.6582	34.4386	9.33658e-303	2.83413	up	--	--	Molecular Function: DNA binding (GO:0003677);; Molecular Function: transcription factor activity, sequence-specific DNA binding (GO:0003700);; Cellular Component: nucleus (GO:0005634);;	K13434|1.3e-166|pop:7494656|K13434 pathogenesis-related genes transcriptional activator PTI6 | (RefSeq) pathogenesis-related genes transcriptional activator PTI6	Plant-pathogen interaction (ko04626)	--	--	AP2 domain	Pathogenesis-related genes transcriptional activator PTI6 OS=Solanum lycopersicum OX=4081 GN=PTI6 PE=2 SV=1	K	Transcription	pathogenesis-related genes transcriptional activator PTI6 [Populus trichocarpa]
gene-POPTR_011G095100	CALS8	0.687221	0.774571	0.575895	1.46216	1.70545	1.30682	3.85697e-14	1.17411	up	--	--	Cellular Component: 1,3-beta-D-glucan synthase complex (GO:0000148);; Molecular Function: 1,3-beta-D-glucan synthase activity (GO:0003843);; Biological Process: (1->3)-beta-D-glucan biosynthetic process (GO:0006075);; Cellular Component: integral component of membrane (GO:0016021);;	K11000|0.0e+00|pop:7471885|K11000 callose synthase [EC:2.4.1.-] | (RefSeq) putative callose synthase 8 isoform X1	--	[M]	Cell wall/membrane/envelope biogenesis	1,3-beta-glucan synthase component	Putative callose synthase 8 OS=Arabidopsis thaliana OX=3702 GN=CALS8 PE=3 SV=2	M	Cell wall/membrane/envelope biogenesis	putative callose synthase 8 isoform X1 [Populus trichocarpa]
gene-POPTR_017G095632	FER	0.357615	0.433888	0.472238	1.56175	1.45929	1.53621	2.67966e-11	1.83879	up	[M]	Cell wall/membrane/envelope biogenesis	Molecular Function: protein kinase activity (GO:0004672);; Molecular Function: ATP binding (GO:0005524);;	K13435|3.2e-69|spen:107018783|K13435 serine/threonine-protein kinase Pto | (RefSeq) receptor-like protein kinase HERK 1 isoform X2	Plant-pathogen interaction (ko04626)	[T]	Signal transduction mechanisms	Protein tyrosine and serine/threonine kinase	Receptor-like protein kinase FERONIA OS=Arabidopsis thaliana OX=3702 GN=FER PE=1 SV=1	T	Signal transduction mechanisms	hypothetical protein POPTR_017G095632 [Populus trichocarpa]
gene-POPTR_014G003832	RGA3	0.192045	0.116549	0.127372	0.395864	0.286213	0.211276	0.00547821	1.03282	up	--	--	Biological Process: defense response (GO:0006952);; Molecular Function: ADP binding (GO:0043531);;	K15078|5.1e-121|tcc:18614561|K15078 structure-specific endonuclease subunit SLX1 [EC:3.6.1.-] | (RefSeq) putative disease resistance protein RGA3	--	[T]	Signal transduction mechanisms	NB-ARC domain	Putative disease resistance protein RGA3 OS=Solanum bulbocastanum OX=147425 GN=RGA3 PE=2 SV=2	T	Signal transduction mechanisms	putative disease resistance protein RGA3 [Populus trichocarpa]
gene-POPTR_010G137300	--	1.35615	1.20617	1.2712	10.1456	10.6268	8.31229	2.81152e-76	2.93936	up	[L]	Replication, recombination and repair	Biological Process: base-excision repair (GO:0006284);; Molecular Function: DNA-3-methyladenine glycosylase activity (GO:0008725);;	K01246|4.6e-172|pop:7482240|K01246 DNA-3-methyladenine glycosylase I [EC:3.2.2.20] | (RefSeq) uncharacterized protein LOC7482240	Base excision repair (ko03410)	--	--	Methyladenine glycosylase	--	L	Replication, recombination and repair	uncharacterized protein LOC7482240 [Populus trichocarpa]
gene-POPTR_006G035500	MED26B	4.88028	5.8939	6.04852	11.0644	10.6034	10.8242	2.11868e-27	1.00016	up	--	--	Cellular Component: nucleus (GO:0005634);;	--	--	--	--	TFIIS helical bundle-like domain	Probable mediator of RNA polymerase II transcription subunit 26b OS=Arabidopsis thaliana OX=3702 GN=MED26B PE=2 SV=1	K	Transcription	probable mediator of RNA polymerase II transcription subunit 26b [Populus trichocarpa]
gene-POPTR_016G130700	At5g01750	3.43287	3.54203	2.45822	8.16222	8.42049	6.98322	2.99155e-15	1.35424	up	--	--	Biological Process: response to acid chemical (GO:0001101);; Biological Process: response to stress (GO:0006950);; Biological Process: defense response (GO:0006952);; Biological Process: biological_process (GO:0008150);; Biological Process: response to external stimulus (GO:0009605);; Biological Process: response to biotic stimulus (GO:0009607);; Biological Process: response to fungus (GO:0009620…	K08238|5.2e-18|brp:103847104|K08238 xyloglucan 6-xylosyltransferase [EC:2.4.2.39] | (RefSeq) probable xyloglucan 6-xylosyltransferase 3	--	--	--	LURP-one-related	Protein LURP-one-related 15 OS=Arabidopsis thaliana OX=3702 GN=At5g01750 PE=1 SV=1	S	Function unknown	protein LURP-one-related 15 [Populus trichocarpa]
gene-POPTR_014G044100	--	0.711227	0.608945	0.966141	3.51241	2.93876	3.82783	2.10333e-18	2.15458	up	--	--	Molecular Function: pectinesterase activity (GO:0030599);; Molecular Function: pectinesterase inhibitor activity (GO:0046910);;	--	--	--	--	Plant invertase/pectin methylesterase inhibitor	Putative invertase inhibitor OS=Platanus acerifolia OX=140101 PE=1 SV=1	S	Function unknown	putative invertase inhibitor [Populus trichocarpa]
gene-POPTR_004G105700	TBL19	0	0.09867	0	3.27958	3.40621	3.32965	0.000406604	2.97996	up	--	--	Cellular Component: Golgi apparatus (GO:0005794);; Molecular Function: O-acetyltransferase activity (GO:0016413);;	K23877|1.1e-102|mdm:103442277|K23877 xyloglucan O-acetyltransferase | (RefSeq) protein ALTERED XYLOGLUCAN 4-like	--	--	--	GDSL/SGNH-like Acyl-Esterase family found in Pmr5 and Cas1p	Protein trichome birefringence-like 19 OS=Arabidopsis thaliana OX=3702 GN=TBL19 PE=3 SV=1	S	Function unknown	protein trichome birefringence-like 19 [Populus trichocarpa]
gene-POPTR_015G071900	UGT74B1	16.7996	16.3864	16.5665	34.1761	32.8725	31.844	5.04736e-63	1.0422	up	[G]	Carbohydrate transport and metabolism	Molecular Function: UDP-glycosyltransferase activity (GO:0008194);; Cellular Component: intracellular membrane-bounded organelle (GO:0043231);; Molecular Function: quercetin 3-O-glucosyltransferase activity (GO:0080043);; Molecular Function: quercetin 7-O-glucosyltransferase activity (GO:0080044);;	K11820|7.5e-269|pop:7474878|K11820 N-hydroxythioamide S-beta-glucosyltransferase [EC:2.4.1.195] | (RefSeq) UDP-glycosyltransferase 74B1	Tryptophan metabolism (ko00380);; Glucosinolate biosynthesis (ko00966);; 2-Oxocarboxylic acid metabolism (ko01210)	[GC]	Carbohydrate transport and metabolism;; Energy production and conversion	UDP-glucoronosyl and UDP-glucosyl transferase	UDP-glycosyltransferase 74B1 OS=Arabidopsis thaliana OX=3702 GN=UGT74B1 PE=1 SV=1	--	--	UDP-glycosyltransferase 74B1 [Populus trichocarpa]
gene-POPTR_004G144800	EFM	14.366	13.8879	13.291	33.2961	32.573	32.7596	3.02268e-85	1.297	up	--	--	Molecular Function: DNA binding (GO:0003677);; Cellular Component: nucleus (GO:0005634);;	K14491|2.4e-11|bvg:104883152|K14491 two-component response regulator ARR-B family | (RefSeq) two-component response regulator ORR24	Plant hormone signal transduction (ko04075)	--	--	Myb-like DNA-binding domain	Myb family transcription factor EFM OS=Arabidopsis thaliana OX=3702 GN=EFM PE=1 SV=2	K	Transcription	transcription factor HHO6 [Populus trichocarpa]
gene-POPTR_004G236300	At4g19190	10.7905	10.6449	11.5181	19.8142	22.6867	21.3653	1.28576e-42	1.00573	up	--	--	Molecular Function: transcription corepressor activity (GO:0003714);; Cellular Component: nucleus (GO:0005634);; Biological Process: negative regulation of transcription, DNA-templated (GO:0045892);;	--	--	[K]	Transcription	N-terminal domain of CBF1 interacting co-repressor CIR	Uncharacterized zinc finger CCHC domain-containing protein At4g19190 OS=Arabidopsis thaliana OX=3702 GN=At4g19190 PE=2 SV=1	K	Transcription	uncharacterized zinc finger CCHC domain-containing protein At4g19190 [Populus trichocarpa]
gene-POPTR_001G402600	--	0.708243	0.839211	0.73601	9.73588	9.35363	8.08644	3.20958e-108	3.58045	up	--	--	Molecular Function: nutrient reservoir activity (GO:0045735);;	--	--	--	--	Cupin	--	S	Function unknown	glutelin type-A 3 [Populus trichocarpa]
gene-POPTR_003G171400	At1g67340	5.02469	5.5157	5.94822	16.2409	14.5656	15.7054	4.11329e-59	1.54397	up	--	--	Cellular Component: cellular_component (GO:0005575);; Cellular Component: intracellular (GO:0005622);; Cellular Component: cell (GO:0005623);; Cellular Component: nucleus (GO:0005634);; Cellular Component: organelle (GO:0043226);; Cellular Component: membrane-bounded organelle (GO:0043227);; Cellular Component: intracellular organelle (GO:0043229);; Cellular Component: intracellular membrane-boun…	K14972|1.6e-17|qsu:112038366|K14972 PAX-interacting protein 1 | (RefSeq) mediator of RNA polymerase II transcription subunit 15a-like isoform X1	--	--	--	MYND finger	F-box protein At1g67340 OS=Arabidopsis thaliana OX=3702 GN=At1g67340 PE=1 SV=1	S	Function unknown	F-box protein At1g67340 [Populus trichocarpa]
gene-POPTR_015G047100	--	228.93	209.636	217.437	923.554	936.267	939.138	0	2.14437	up	--	--	--	--	--	--	--	--	--	--	--	uncharacterized protein LOC7475634 [Populus trichocarpa]
gene-POPTR_014G087200	CRCK2	7.49436	6.45889	7.2994	14.2544	13.5411	13.9289	1.56544e-31	1.02298	up	[T]	Signal transduction mechanisms	Molecular Function: protein serine/threonine kinase activity (GO:0004674);; Molecular Function: ATP binding (GO:0005524);;	K01180|1.9e-51|cmax:111487562|K01180 endo-1,3(4)-beta-glucanase [EC:3.2.1.6] | (RefSeq) uncharacterized protein LOC111487562	--	[T]	Signal transduction mechanisms	Protein kinase domain	Calmodulin-binding receptor-like cytoplasmic kinase 2 OS=Arabidopsis thaliana OX=3702 GN=CRCK2 PE=2 SV=1	T	Signal transduction mechanisms	calmodulin-binding receptor-like cytoplasmic kinase 2 [Populus trichocarpa]
gene-POPTR_007G140400	BT3	3.42184	3.37204	3.21225	32.7695	35.3381	31.3912	0	3.28968	up	--	--	Molecular Function: transcription cofactor activity (GO:0003712);; Molecular Function: histone acetyltransferase activity (GO:0004402);; Biological Process: regulation of transcription, DNA-templated (GO:0006355);; Molecular Function: zinc ion binding (GO:0008270);; Cellular Component: host cell nucleus (GO:0042025);;	K04498|8.0e-12|tcc:18602114|K04498 E1A/CREB-binding protein [EC:2.3.1.48] | (RefSeq) histone acetyltransferase HAC12	--	[K]	Transcription	TAZ zinc finger	BTB/POZ and TAZ domain-containing protein 3 OS=Arabidopsis thaliana OX=3702 GN=BT3 PE=1 SV=2	K	Transcription	BTB/POZ and TAZ domain-containing protein 3 [Populus trichocarpa]
gene-POPTR_T109100	--	9.48951	9.20857	11.2023	21.159	19.5568	20.0218	3.29033e-41	1.07439	up	--	--	Biological Process: regulation of protein ubiquitination involved in ubiquitin-dependent protein catabolic process (GO:2000058);;	--	--	[OT]	Posttranslational modification, protein turnover, chaperones;; Signal transduction mechanisms	UBA/TS-N domain	--	--	--	NEDD8 ultimate buster 1-like isoform X1 [Populus trichocarpa]
gene-POPTR_005G167800	--	0.19073	0.117634	0.310057	2.45967	3.20524	2.76535	2.56468e-35	3.67507	up	[G]	Carbohydrate transport and metabolism	Molecular Function: hydrolase activity, hydrolyzing O-glycosyl compounds (GO:0004553);; Cellular Component: cytoplasm (GO:0005737);; Biological Process: carbohydrate metabolic process (GO:0005975);; Biological Process: establishment or maintenance of cell polarity (GO:0007163);; Cellular Component: actin cytoskeleton (GO:0015629);; Biological Process: cell migration (GO:0016477);; Molecular Funct…	K01210|7.1e-34|qsu:112019139|K01210 glucan 1,3-beta-glucosidase [EC:3.2.1.58] | (RefSeq) glucan 1,3-beta-glucosidase-like	Starch and sucrose metabolism (ko00500)	--	--	Cellulase (glycosyl hydrolase family 5)	--	G	Carbohydrate transport and metabolism	probable glucan 1,3-beta-glucosidase A [Populus trichocarpa]
gene-POPTR_011G109900	LSH7	0	0	0	0.384709	0.474215	0.376825	1.94236e-19	6.06701	up	--	--	Cellular Component: nucleus (GO:0005634);; Biological Process: mRNA transcription (GO:0009299);; Biological Process: response to light stimulus (GO:0009416);;	K13413|3.4e-52|sbi:110435403|K13413 mitogen-activated protein kinase kinase 4/5 [EC:2.7.12.2] | (RefSeq) mitogen-activated protein kinase kinase 5-like	MAPK signaling pathway - plant (ko04016);; Plant hormone signal transduction (ko04075);; Plant-pathogen interaction (ko04626)	--	--	Protein of unknown function (DUF640)	Protein LIGHT-DEPENDENT SHORT HYPOCOTYLS 7 OS=Arabidopsis thaliana OX=3702 GN=LSH7 PE=1 SV=1	S	Function unknown	protein LIGHT-DEPENDENT SHORT HYPOCOTYLS 7 [Populus trichocarpa]
gene-POPTR_014G066100	ZAT9	0.769534	0.550468	0.43532	1.31839	1.15245	1.03985	0.000460172	1.00705	up	--	--	Molecular Function: regulatory region nucleic acid binding (GO:0001067);; Molecular Function: molecular_function (GO:0003674);; Molecular Function: nucleic acid binding (GO:0003676);; Molecular Function: DNA binding (GO:0003677);; Molecular Function: transcription factor activity, sequence-specific DNA binding (GO:0003700);; Molecular Function: binding (GO:0005488);; Cellular Component: cellular_…	--	--	[R]	General function prediction only	C2H2-type zinc finger	Zinc finger protein ZAT9 OS=Arabidopsis thaliana OX=3702 GN=ZAT9 PE=2 SV=1	S	Function unknown	zinc finger protein ZAT9 isoform X2 [Populus trichocarpa]
gene-POPTR_017G036800	UBI11	248.642	253.732	264.24	511.377	513.446	519.065	1.18583e-154	1.06279	up	[O]	Posttranslational modification, protein turnover, chaperones	Biological Process: response to acid chemical (GO:0001101);; Molecular Function: protein binding (GO:0005515);; Biological Process: cellular protein modification process (GO:0006464);; Biological Process: nitrogen compound metabolic process (GO:0006807);; Biological Process: biological_process (GO:0008150);; Biological Process: metabolic process (GO:0008152);; Biological Process: response to endo…	K08770|1.2e-211|adu:107466949|K08770 ubiquitin C | (RefSeq) polyubiquitin isoform X1	Ubiquitin mediated proteolysis (ko04120)	[OR]	Posttranslational modification, protein turnover, chaperones;; General function prediction only	Ubiquitin family	Polyubiquitin OS=Nicotiana sylvestris OX=4096 GN=UBI11 PE=2 SV=1	O	Posttranslational modification, protein turnover, chaperones	polyubiquitin [Hevea brasiliensis]
gene-POPTR_010G167000	--	4.11377	4.75988	3.54749	13.792	15.6851	14.9946	3.56488e-46	1.87273	up	--	--	Molecular Function: protein phosphatase inhibitor activity (GO:0004864);; Cellular Component: cytoplasm (GO:0005737);; Biological Process: negative regulation of protein dephosphorylation (GO:0035308);;	--	--	--	--	cAMP-regulated phosphoprotein/endosulfine conserved region	--	S	Function unknown	uncharacterized protein LOC7481577 isoform X1 [Populus trichocarpa]
gene-POPTR_005G206400	N	2.16116	2.2731	1.78614	4.11279	4.39291	4.43737	9.60834e-21	1.10154	up	[R]	General function prediction only	Biological Process: signal transduction (GO:0007165);; Molecular Function: ADP binding (GO:0043531);;	K00695|5.0e-144|mtr:MTR_6g478030|K00695 sucrose synthase [EC:2.4.1.13] | (RefSeq) sucrose synthase	Starch and sucrose metabolism (ko00500)	--	--	TIR domain	TMV resistance protein N OS=Nicotiana glutinosa OX=35889 GN=N PE=1 SV=1	--	--	TMV resistance protein N isoform X1 [Populus trichocarpa]
gene-POPTR_017G126200	CML23	5.85428	5.92783	5.73493	14.5146	13.4677	14.0771	3.48579e-28	1.30794	up	[T]	Signal transduction mechanisms	Molecular Function: calcium ion binding (GO:0005509);;	K13448|2.1e-69|pop:18099375|K13448 calcium-binding protein CML | (RefSeq) calcium-binding protein CML24	Plant-pathogen interaction (ko04626)	[T]	Signal transduction mechanisms	EF hand	Probable calcium-binding protein CML23 OS=Arabidopsis thaliana OX=3702 GN=CML23 PE=2 SV=1	T	Signal transduction mechanisms	calcium-binding protein CML24 [Populus trichocarpa]
gene-POPTR_008G130032	MPK15	43.9316	41.2771	44.6139	83.8918	91.3404	90.1778	6.84174e-69	1.08284	up	[M]	Cell wall/membrane/envelope biogenesis	Molecular Function: MAP kinase activity (GO:0004707);; Molecular Function: ATP binding (GO:0005524);;	K20538|4.6e-131|aly:9329047|K20538 mitogen-activated protein kinase 8 [EC:2.7.11.24] | (RefSeq) mitogen-activated protein kinase 8 isoform X1	MAPK signaling pathway - plant (ko04016)	[T]	Signal transduction mechanisms	Protein kinase domain	Mitogen-activated protein kinase 15 OS=Arabidopsis thaliana OX=3702 GN=MPK15 PE=1 SV=3	T	Signal transduction mechanisms	hypothetical protein POPTR_008G130032 [Populus trichocarpa]
gene-POPTR_009G133500	ERD7	1.43612	1.10619	1.61493	6.25942	5.73864	6.28893	8.46328e-54	2.17465	up	--	--	Cellular Component: plasma membrane (GO:0005886);;	K19366|4.4e-231|pop:7494253|K19366 spartin | (RefSeq) protein EARLY-RESPONSIVE TO DEHYDRATION 7, chloroplastic	Endocytosis (ko04144)	--	--	Senescence-associated protein	Protein EARLY-RESPONSIVE TO DEHYDRATION 7, chloroplastic OS=Arabidopsis thaliana OX=3702 GN=ERD7 PE=1 SV=1	S	Function unknown	protein EARLY-RESPONSIVE TO DEHYDRATION 7, chloroplastic [Populus trichocarpa]
gene-POPTR_005G004632	--	2.48518	1.94401	3.35664	5.57184	5.6196	4.73762	2.48529e-06	1.06511	up	--	--	--	K22381|2.3e-128|pop:7465219|K22381 E3 ubiquitin-protein ligase ZNF598 [EC:2.3.2.27] | (RefSeq) E3 ubiquitin-protein ligase HEL2	--	[O]	Posttranslational modification, protein turnover, chaperones	--	--	O	Posttranslational modification, protein turnover, chaperones	hypothetical protein POPTR_005G004632 [Populus trichocarpa]
gene-POPTR_009G046800	At5g58620	9.4891	9.05969	9.62626	19.0958	19.7418	17.4524	1.82482e-55	1.05105	up	--	--	Molecular Function: metal ion binding (GO:0046872);;	K23047|7.8e-47|jcu:105646905|K23047 E3 ubiquitin-protein ligase UNKL [EC:2.3.2.27] | (RefSeq) zinc finger CCCH domain-containing protein 2	--	[R]	General function prediction only	Ankyrin repeat	Zinc finger CCCH domain-containing protein 66 OS=Arabidopsis thaliana OX=3702 GN=At5g58620 PE=2 SV=1	O	Posttranslational modification, protein turnover, chaperones	zinc finger CCCH domain-containing protein 66 isoform X1 [Populus trichocarpa]
gene-POPTR_007G084800	CYP71AU50	2.30444	2.0614	2.51342	4.71758	4.35112	4.7797	1.23829e-13	1.05305	up	[QV]	Secondary metabolites biosynthesis, transport and catabolism;; Defense mechanisms	Molecular Function: iron ion binding (GO:0005506);; Cellular Component: membrane (GO:0016020);; Molecular Function: oxidoreductase activity, acting on paired donors, with incorporation or reduction of molecular oxygen, NAD(P)H as one donor, and incorporation of one atom of oxygen (GO:0016709);; Molecular Function: heme binding (GO:0020037);;	K20562|8.9e-223|mesc:110628019|K20562 biphenyl-4-hydroxylase | (RefSeq) cytochrome P450 CYP736A12-like	--	[Q]	Secondary metabolites biosynthesis, transport and catabolism	Cytochrome P450	Cytochrome P450 71AU50 OS=Prunus mume OX=102107 GN=CYP71AU50 PE=2 SV=1	Q	Secondary metabolites biosynthesis, transport and catabolism	cytochrome P450 CYP736A12 [Populus trichocarpa]
gene-POPTR_002G131200	ARI8	12.9964	11.7386	13.2342	26.9466	27.3539	25.8141	5.8216e-65	1.12882	up	--	--	Cellular Component: ubiquitin ligase complex (GO:0000151);; Biological Process: protein polyubiquitination (GO:0000209);; Cellular Component: cytoplasm (GO:0005737);; Biological Process: ubiquitin-dependent protein catabolic process (GO:0006511);; Molecular Function: ubiquitin conjugating enzyme binding (GO:0031624);; Biological Process: positive regulation of proteasomal ubiquitin-dependent prot…	K11968|0.0e+00|pop:7483759|K11968 ariadne-1 [EC:2.3.2.31] | (RefSeq) probable E3 ubiquitin-protein ligase ARI8	--	[O]	Posttranslational modification, protein turnover, chaperones	IBR domain, a half RING-finger domain	Probable E3 ubiquitin-protein ligase ARI8 OS=Arabidopsis thaliana OX=3702 GN=ARI8 PE=2 SV=1	O	Posttranslational modification, protein turnover, chaperones	probable E3 ubiquitin-protein ligase ARI8 [Populus trichocarpa]
gene-POPTR_014G124500	--	1.02977	0.519513	0.684028	10.4785	11.5408	10.6387	3.11335e-102	3.8627	up	--	--	--	--	--	--	--	--	--	--	--	uncharacterized protein LOC7491276 [Populus trichocarpa]
gene-POPTR_010G018701	SD11	0.104505	0	0	1.06501	1.3398	1.62006	0.00284288	2.52843	up	[T]	Signal transduction mechanisms	Molecular Function: protein serine/threonine kinase activity (GO:0004674);; Molecular Function: ATP binding (GO:0005524);; Cellular Component: integral component of membrane (GO:0016021);;	K24104|1.4e-72|thj:104799061|K24104 GPN-loop GTPase | (RefSeq) LOW QUALITY PROTEIN: uncharacterized protein LOC104799061	--	--	--	Protein tyrosine and serine/threonine kinase	G-type lectin S-receptor-like serine/threonine-protein kinase SD1-1 OS=Arabidopsis thaliana OX=3702 GN=SD11 PE=1 SV=1	T	Signal transduction mechanisms	hypothetical protein POPTR_010G018701 [Populus trichocarpa]
gene-POPTR_001G105800	HMA5	1.27045	1.50214	1.3097	6.67082	5.64041	6.02797	1.64043e-80	2.20491	up	[P]	Inorganic ion transport and metabolism	Molecular Function: copper ion binding (GO:0005507);; Molecular Function: ATP binding (GO:0005524);; Cellular Component: integral component of membrane (GO:0016021);; Molecular Function: cation-transporting ATPase activity (GO:0019829);; Biological Process: metal ion transport (GO:0030001);;	K17686|0.0e+00|pop:7490311|K17686 P-type Cu+ transporter [EC:7.2.2.8] | (RefSeq) probable copper-transporting ATPase HMA5	MAPK signaling pathway - plant (ko04016)	[P]	Inorganic ion transport and metabolism	E1-E2 ATPase	Probable copper-transporting ATPase HMA5 OS=Arabidopsis thaliana OX=3702 GN=HMA5 PE=1 SV=2	P	Inorganic ion transport and metabolism	probable copper-transporting ATPase HMA5 [Populus trichocarpa]
gene-POPTR_017G129050	--	1.11785	0.637623	1.61795	4.03265	5.08582	5.58329	1.38675e-07	2.02192	up	--	--	--	--	--	--	--	--	--	--	--	hypothetical protein POPTR_017G129050 [Populus trichocarpa]
gene-POPTR_012G059500	--	0.211007	0.103867	0.172307	6.64633	5.56375	6.13602	1.34549e-56	4.9679	up	--	--	--	--	--	--	--	--	--	--	--	uncharacterized protein LOC7487087 [Populus trichocarpa]
gene-POPTR_005G096200	--	1.28258	1.43798	1.18319	3.75406	4.8481	3.6396	2.27453e-07	1.63187	up	--	--	--	--	--	--	--	--	--	--	--	hypothetical protein POPTR_005G096200 [Populus trichocarpa]
gene-POPTR_T162200	--	7.01837	4.39212	6.3455	20.3803	19.6325	23.9023	3.41912e-29	1.87132	up	--	--	--	--	--	--	--	Wound-induced protein	--	S	Function unknown	uncharacterized protein LOC18108630 [Populus trichocarpa]
gene-POPTR_009G087200	WLIM1	4.51982	3.23336	4.68595	48.0244	45.4386	43.9837	1.5604e-272	3.5047	up	--	--	Cellular Component: plasma membrane (GO:0005886);; Cellular Component: actin cytoskeleton (GO:0015629);; Molecular Function: metal ion binding (GO:0046872);; Molecular Function: actin filament binding (GO:0051015);; Biological Process: actin filament bundle assembly (GO:0051017);;	K09377|1.8e-115|pop:7478747|K09377 cysteine and glycine-rich protein | (RefSeq) LIM domain-containing protein WLIM1	--	[TZ]	Signal transduction mechanisms;; Cytoskeleton	LIM domain	LIM domain-containing protein WLIM1 OS=Arabidopsis thaliana OX=3702 GN=WLIM1 PE=1 SV=1	--	--	LIM domain-containing protein WLIM1 [Populus trichocarpa]
gene-POPTR_014G147000	RIC4	0.187769	0.348651	0.325858	2.24572	1.56992	2.48308	6.43924e-16	2.76683	up	--	--	--	K23541|3.6e-30|egu:105051209|K23541 Ca2+/H+ antiporter, TMEM165/GDT1 family | (RefSeq) LOW QUALITY PROTEIN: uncharacterized protein LOC105051209	--	--	--	P21-Rho-binding domain	CRIB domain-containing protein RIC4 OS=Arabidopsis thaliana OX=3702 GN=RIC4 PE=1 SV=1	S	Function unknown	CRIB domain-containing protein RIC4 [Populus trichocarpa]
gene-POPTR_006G267700	COL4	199.572	192.698	209.512	433.604	431.663	441.688	6.87869e-167	1.17172	up	--	--	Cellular Component: nucleus (GO:0005634);; Molecular Function: zinc ion binding (GO:0008270);; Biological Process: regulation of flower development (GO:0009909);;	K12135|2.7e-40|thj:104802991|K12135 zinc finger protein CONSTANS | (RefSeq) zinc finger protein CONSTANS-LIKE 2-like	Circadian rhythm - plant (ko04712)	[K]	Transcription	CCT motif	Zinc finger protein CONSTANS-LIKE 4 OS=Arabidopsis thaliana OX=3702 GN=COL4 PE=2 SV=2	K	Transcription	zinc finger protein CONSTANS-LIKE 4 [Populus trichocarpa]
gene-POPTR_004G183900	WIP3	0.604502	0.837895	0.849682	3.55866	4.08923	3.02822	5.66752e-25	2.22961	up	--	--	Cellular Component: nucleus (GO:0005634);; Biological Process: regulation of gene expression (GO:0010468);; Biological Process: anatomical structure development (GO:0048856);;	--	--	[R]	General function prediction only	C2H2-type zinc finger	Zinc finger protein WIP3 OS=Arabidopsis thaliana OX=3702 GN=WIP3 PE=2 SV=1	S	Function unknown	zinc finger protein WIP3 [Populus trichocarpa]
gene-POPTR_015G106700	--	25.0472	22.9578	16.5363	53.0336	54.3833	61.5549	5.90779e-13	1.41787	up	--	--	--	--	--	--	--	--	--	--	--	programmed cell death protein 4 [Populus trichocarpa]
gene-POPTR_011G011100	STM	12.0931	10.3986	11.4071	35.7498	35.3129	32.6089	1.06136e-97	1.6611	up	--	--	Cellular Component: nucleus (GO:0005634);; Biological Process: regulation of transcription, DNA-templated (GO:0006355);; Molecular Function: sequence-specific DNA binding (GO:0043565);;	--	--	[K]	Transcription	KNOX2 domain	Homeobox protein SHOOT MERISTEMLESS OS=Arabidopsis thaliana OX=3702 GN=STM PE=1 SV=2	K	Transcription	homeobox protein SBH1 [Populus trichocarpa]
Populus_trichocarpa_newGene_954	--	5.25562	5.07729	4.56182	10.9953	10.4801	10.7149	1.57665e-32	1.15755	up	--	--	--	--	--	[L]	Replication, recombination and repair	DDE superfamily endonuclease	--	L	Replication, recombination and repair	protein ALP1-like [Populus trichocarpa]
gene-POPTR_010G210800	--	4.22959	4.23951	4.08158	8.76898	8.37288	8.4431	4.02528e-18	1.07235	up	--	--	--	K01593|2.2e-09|mtr:MTR_7g058700|K01593 aromatic-L-amino-acid/L-tryptophan decarboxylase [EC:4.1.1.28 4.1.1.105] | (RefSeq) tyrosine/DOPA decarboxylase	Tyrosine metabolism (ko00350);; Phenylalanine metabolism (ko00360);; Tryptophan metabolism (ko00380);; Isoquinoline alkaloid biosynthesis (ko00950);; Betalain biosynthesis (ko00965)	--	--	Protein of unknown function (DUF674)	--	L	Replication, recombination and repair	hypothetical protein POPTR_010G210800 [Populus trichocarpa]
gene-POPTR_T060450	RGA2	1.23924	0.762679	1.19398	2.93992	3.46093	2.76249	2.48156e-10	1.53302	up	--	--	Biological Process: defense response (GO:0006952);; Molecular Function: ADP binding (GO:0043531);;	K15078|4.5e-70|tcc:18614561|K15078 structure-specific endonuclease subunit SLX1 [EC:3.6.1.-] | (RefSeq) putative disease resistance protein RGA3	--	[T]	Signal transduction mechanisms	NB-ARC domain	Disease resistance protein RGA2 OS=Solanum bulbocastanum OX=147425 GN=RGA2 PE=1 SV=1	T	Signal transduction mechanisms	hypothetical protein POPTR_T060450 [Populus trichocarpa]
gene-POPTR_009G136700	--	0.594544	0.772798	0.629788	1.58016	1.3827	1.8121	9.62675e-07	1.2694	up	[R]	General function prediction only	Cellular Component: integral component of membrane (GO:0016021);;	K10532|4.0e-248|pop:7472108|K10532 heparan-alpha-glucosaminide N-acetyltransferase [EC:2.3.1.78] | (RefSeq) heparan-alpha-glucosaminide N-acetyltransferase isoform X1	Glycosaminoglycan degradation (ko00531)	[S]	Function unknown	Protein of unknown function (DUF1624)	--	S	Function unknown	heparan-alpha-glucosaminide N-acetyltransferase isoform X1 [Populus trichocarpa]
gene-POPTR_004G007800	SLAH1	0.240971	0.141014	0.346493	13.0345	13.0705	11.4094	2.78191e-54	5.38778	up	--	--	Biological Process: cellular ion homeostasis (GO:0006873);; Molecular Function: voltage-gated anion channel activity (GO:0008308);; Cellular Component: integral component of membrane (GO:0016021);;	--	--	--	--	Voltage-dependent anion channel	S-type anion channel SLAH1 OS=Arabidopsis thaliana OX=3702 GN=SLAH1 PE=2 SV=1	P	Inorganic ion transport and metabolism	hypothetical protein POPTR_004G007800 [Populus trichocarpa]
gene-POPTR_002G060500	XTH15	2.41921	2.25737	2.13686	3.89355	4.75295	4.73961	2.44096e-08	1.0104	up	[G]	Carbohydrate transport and metabolism	Molecular Function: hydrolase activity, hydrolyzing O-glycosyl compounds (GO:0004553);; Cellular Component: cell wall (GO:0005618);; Biological Process: xyloglucan metabolic process (GO:0010411);; Molecular Function: xyloglucan:xyloglucosyl transferase activity (GO:0016762);; Biological Process: cell wall biogenesis (GO:0042546);; Cellular Component: apoplast (GO:0048046);; Biological Process: ce…	K08235|7.7e-174|pop:7480729|K08235 xyloglucan:xyloglucosyl transferase [EC:2.4.1.207] | (RefSeq) xyloglucan endotransglucosylase/hydrolase protein 15	--	--	--	Glycosyl hydrolases family 16	Xyloglucan endotransglucosylase/hydrolase protein 15 OS=Arabidopsis thaliana OX=3702 GN=XTH15 PE=1 SV=1	G	Carbohydrate transport and metabolism	xyloglucan endotransglucosylase/hydrolase protein 15 [Populus trichocarpa]
gene-POPTR_010G211500	--	1.26642	0.801971	0.73536	4.30865	3.59197	3.13955	7.8911e-15	1.93741	up	--	--	Biological Process: developmental process (GO:0032502);;	K01513|2.3e-07|ats:109769794|K01513 ectonucleotide pyrophosphatase/phosphodiesterase family member 1/3 [EC:3.1.4.1 3.6.1.9] | (RefSeq) uncharacterized protein LOC109769794	Purine metabolism (ko00230);; Pyrimidine metabolism (ko00240);; Starch and sucrose metabolism (ko00500);; Riboflavin metabolism (ko00740);; Nicotinate and nicotinamide metabolism (ko00760);; Pantothenate and CoA biosynthesis (ko00770)	--	--	Plant protein 1589 of unknown function (A_thal_3526)	--	S	Function unknown	hypothetical protein POPTR_010G211500 [Populus trichocarpa]
gene-POPTR_013G073900	UPF1	9.58604	8.86042	10.9991	23.3977	21.5894	20.3473	1.76893e-56	1.20158	up	[L]	Replication, recombination and repair	Cellular Component: chloroplast stroma (GO:0009570);; Cellular Component: chloroplast envelope (GO:0009941);;	K19036|2.3e-97|boe:106318554|K19036 ATP-dependent RNA/DNA helicase IGHMBP2 [EC:3.6.4.12 3.6.4.13] | (RefSeq) DNA-binding protein SMUBP-2	--	[L]	Replication, recombination and repair	AAA domain	Regulator of nonsense transcripts 1 homolog OS=Arabidopsis thaliana OX=3702 GN=UPF1 PE=1 SV=2	L	Replication, recombination and repair	DNA-binding protein SMUBP-2 [Populus trichocarpa]
gene-POPTR_003G136700	--	3.61186	3.00841	2.96353	22.6259	19.8121	21.3825	1.69313e-82	2.75521	up	--	--	--	--	--	--	--	--	--	S	Function unknown	hypothetical protein POPTR_003G136700 [Populus trichocarpa]
gene-POPTR_006G132000	UPL4	15.3398	15.5534	16.8445	32.6817	33.066	33.4785	1.43985e-110	1.10791	up	--	--	Molecular Function: ubiquitin-protein transferase activity (GO:0004842);;	K10590|0.0e+00|pop:18100234|K10590 E3 ubiquitin-protein ligase TRIP12 [EC:2.3.2.26] | (RefSeq) E3 ubiquitin-protein ligase UPL4 isoform X1	Ubiquitin mediated proteolysis (ko04120)	[O]	Posttranslational modification, protein turnover, chaperones	HECT-domain (ubiquitin-transferase)	E3 ubiquitin-protein ligase UPL4 OS=Arabidopsis thaliana OX=3702 GN=UPL4 PE=3 SV=1	O	Posttranslational modification, protein turnover, chaperones	E3 ubiquitin-protein ligase UPL4 isoform X1 [Populus trichocarpa]
gene-POPTR_002G037100	NAC021	0.649075	0.746456	0.75425	6.2409	7.38139	6.47327	6.69405e-66	3.2161	up	--	--	Molecular Function: DNA binding (GO:0003677);; Cellular Component: nucleus (GO:0005634);; Biological Process: regulation of transcription, DNA-templated (GO:0006355);;	K00521|1.1e-33|cmos:111447866|K00521 ferric-chelate reductase [EC:1.16.1.7] | (RefSeq) ferric reduction oxidase 7, chloroplastic-like	--	--	--	No apical meristem (NAM) protein	NAC domain-containing protein 21/22 OS=Arabidopsis thaliana OX=3702 GN=NAC021 PE=1 SV=2	K	Transcription	protein CUP-SHAPED COTYLEDON 2 [Populus trichocarpa]
gene-POPTR_001G328900	--	0.301882	0.522211	0.166678	7.75989	7.65475	8.52358	7.71822e-60	4.48531	up	--	--	Cellular Component: integral component of membrane (GO:0016021);;	K11094|5.4e-09|peq:110018477|K11094 U2 small nuclear ribonucleoprotein B'' | (RefSeq) U2 small nuclear ribonucleoprotein B''-like isoform X1	Spliceosome (ko03040)	--	--	Protein of unknown function (DUF3339)	--	S	Function unknown	hypothetical protein POPTR_001G328900 [Populus trichocarpa]
gene-POPTR_005G037300	SUGTL3	2.99727	2.64296	1.25465	5.49444	4.55623	5.30046	1.95766e-05	1.16527	up	[G]	Carbohydrate transport and metabolism	Cellular Component: integral component of membrane (GO:0016021);; Molecular Function: transmembrane transporter activity (GO:0022857);;	K03444|1.3e-48|pop:18098814|K03444 MFS transporter, SP family, ERD6-like sugar transporter | (RefSeq) sugar transporter ERD6-like 3 isoform X1	--	[R]	General function prediction only	Sugar (and other) transporter	Sugar transporter ERD6-like 2 OS=Arabidopsis thaliana OX=3702 GN=SUGTL3 PE=2 SV=1	U	Intracellular trafficking, secretion, and vesicular transport	sugar transporter ERD6-like 2 [Populus trichocarpa]
gene-POPTR_007G083600	CYP71AU50	4.3056	3.74084	4.54382	8.00457	8.85451	8.28816	6.25923e-18	1.04623	up	[QV]	Secondary metabolites biosynthesis, transport and catabolism;; Defense mechanisms	Molecular Function: monooxygenase activity (GO:0004497);; Molecular Function: iron ion binding (GO:0005506);; Molecular Function: oxidoreductase activity, acting on paired donors, with incorporation or reduction of molecular oxygen (GO:0016705);; Molecular Function: heme binding (GO:0020037);;	K20562|7.5e-194|rcu:8286271|K20562 biphenyl-4-hydroxylase | (RefSeq) cytochrome P450 CYP736A12	--	[Q]	Secondary metabolites biosynthesis, transport and catabolism	Cytochrome P450	Cytochrome P450 71AU50 OS=Prunus mume OX=102107 GN=CYP71AU50 PE=2 SV=1	Q	Secondary metabolites biosynthesis, transport and catabolism	cytochrome P450 CYP736A12-like [Populus trichocarpa]
gene-POPTR_017G109300	POX2	1.42513	1.35442	1.29392	5.01189	5.74709	5.24963	2.79658e-43	2.00522	up	[E]	Amino acid transport and metabolism	Molecular Function: proline dehydrogenase activity (GO:0004657);; Cellular Component: mitochondrion (GO:0005739);; Biological Process: proline catabolic process to glutamate (GO:0010133);; Molecular Function: FAD binding (GO:0071949);;	K00318|7.9e-280|pop:18107429|K00318 proline dehydrogenase [EC:1.5.5.2] | (RefSeq) proline dehydrogenase 2, mitochondrial isoform X1	Arginine and proline metabolism (ko00330)	[E]	Amino acid transport and metabolism	Proline dehydrogenase	Proline dehydrogenase 2, mitochondrial OS=Arabidopsis thaliana OX=3702 GN=POX2 PE=2 SV=1	E	Amino acid transport and metabolism	proline dehydrogenase 2, mitochondrial isoform X1 [Populus trichocarpa]
gene-POPTR_007G036300	At2g23540	0.452385	0.282708	0.663306	1.50802	1.24815	1.02239	2.76442e-05	1.42067	up	[IR]	Lipid transport and metabolism;; General function prediction only	Molecular Function: hydrolase activity, acting on ester bonds (GO:0016788);;	K00679|3.6e-51|cic:CICLE_v10027727mg|K00679 phospholipid:diacylglycerol acyltransferase [EC:2.3.1.158] | (RefSeq) hypothetical protein	Glycerolipid metabolism (ko00561)	--	--	GDSL-like Lipase/Acylhydrolase	GDSL esterase/lipase At2g23540 OS=Arabidopsis thaliana OX=3702 GN=At2g23540 PE=2 SV=1	S	Function unknown	GDSL esterase/lipase At2g23540 [Populus trichocarpa]
gene-POPTR_008G061100	NPF5.7	4.72424	5.31574	5.65802	17.721	16.7673	17.5316	9.04825e-95	1.77158	up	[E]	Amino acid transport and metabolism	Molecular Function: peptide:proton symporter activity (GO:0015333);; Cellular Component: integral component of membrane (GO:0016021);; Molecular Function: oligopeptide transmembrane transporter activity (GO:0035673);; Molecular Function: peptide transmembrane transporter activity (GO:1904680);;	K14638|2.7e-226|cann:107843454|K14638 solute carrier family 15 (peptide/histidine transporter), member 3/4 | (RefSeq) protein NRT1/ PTR FAMILY 5.6-like	--	[E]	Amino acid transport and metabolism	POT family	Protein NRT1/ PTR FAMILY 5.7 OS=Arabidopsis thaliana OX=3702 GN=NPF5.7 PE=2 SV=2	E	Amino acid transport and metabolism	protein NRT1/ PTR FAMILY 5.6 [Populus trichocarpa]
gene-POPTR_009G105400	--	2.5568	2.24469	2.78944	7.89202	7.50249	6.97004	3.52896e-32	1.59969	up	--	--	Cellular Component: plasma membrane (GO:0005886);;	--	--	--	--	Protein of unknown function (DUF1645)	--	S	Function unknown	uncharacterized protein LOC7490015 [Populus trichocarpa]
gene-POPTR_006G033500	At5g07050	6.1709	5.58945	6.35677	30.1243	30.0307	28.7297	6.36782e-188	2.34086	up	[GER]	Carbohydrate transport and metabolism;; Amino acid transport and metabolism;; General function prediction only	Cellular Component: plasma membrane (GO:0005886);; Cellular Component: integral component of membrane (GO:0016021);; Molecular Function: transmembrane transporter activity (GO:0022857);;	K17500|4.3e-58|nto:104085001|K17500 integrin-linked kinase-associated serine/threonine phosphatase 2C [EC:3.1.3.16] | (RefSeq) WAT1-related protein At3g18200 isoform X1	--	--	--	EamA-like transporter family	WAT1-related protein At5g07050 OS=Arabidopsis thaliana OX=3702 GN=At5g07050 PE=2 SV=1	S	Function unknown	WAT1-related protein At5g07050 [Populus trichocarpa]
gene-POPTR_002G020500	PR5K	24.329	22.7196	23.7632	53.1098	47.3172	47.048	1.10568e-63	1.10943	up	--	--	Cellular Component: extracellular region (GO:0005576);; Biological Process: defense response (GO:0006952);;	K12173|3.2e-64|gmx:100794341|K12173 BRCA1-A complex subunit BRE | (RefSeq) BRISC and BRCA1-A complex member 2	Homologous recombination (ko03440)	--	--	Thaumatin family	PR5-like receptor kinase OS=Arabidopsis thaliana OX=3702 GN=PR5K PE=1 SV=1	S	Function unknown	thaumatin-like protein 1b [Populus trichocarpa]
gene-POPTR_010G196300	--	1.20933	1.45323	0.917658	16.2669	15.5891	16.3737	1.04951e-127	3.73134	up	--	--	Molecular Function: fatty acid binding (GO:0005504);; Biological Process: systemic acquired resistance (GO:0009627);;	--	--	--	--	Probable lipid transfer	--	S	Function unknown	hypothetical protein POPTR_010G196300 [Populus trichocarpa]
gene-POPTR_001G095100	--	1.41901	1.41307	1.80516	3.05346	3.08773	3.13341	5.4991e-06	1.02842	up	--	--	--	--	--	--	--	--	--	--	--	hypothetical protein POPTR_001G095100 [Populus trichocarpa]
gene-POPTR_010G082400	VAB	31.5102	29.5197	33.6846	68.6473	66.3549	69.4862	6.18339e-99	1.16278	up	--	--	--	--	--	--	--	Auxin canalisation	VAN3-binding protein OS=Arabidopsis thaliana OX=3702 GN=VAB PE=1 SV=1	S	Function unknown	VAN3-binding protein isoform X1 [Populus trichocarpa]
gene-POPTR_001G304800	CCOAOMT2	44.2497	38.569	40.5567	88.7607	87.841	83.6027	4.14474e-73	1.12718	up	[R]	General function prediction only	Molecular Function: O-methyltransferase activity (GO:0008171);; Molecular Function: S-adenosylmethionine-dependent methyltransferase activity (GO:0008757);; Biological Process: methylation (GO:0032259);;	K00588|7.2e-141|pop:7492044|K00588 caffeoyl-CoA O-methyltransferase [EC:2.1.1.104] | (RefSeq) caffeoyl-CoA O-methyltransferase 2	Phenylpropanoid biosynthesis (ko00940);; Flavonoid biosynthesis (ko00941);; Stilbenoid, diarylheptanoid and gingerol biosynthesis (ko00945)	[Q]	Secondary metabolites biosynthesis, transport and catabolism	O-methyltransferase	Caffeoyl-CoA O-methyltransferase 2 OS=Populus trichocarpa OX=3694 GN=CCOAOMT2 PE=2 SV=1	Q	Secondary metabolites biosynthesis, transport and catabolism	caffeoyl-CoA O-methyltransferase 2 [Populus trichocarpa]
gene-POPTR_013G133900	--	0.462812	1.21607	0.78183	2.49938	2.01284	1.85452	4.87341e-07	1.28946	up	[R]	General function prediction only	Cellular Component: integral component of membrane (GO:0016021);;	K00889|3.3e-55|dcr:108218789|K00889 1-phosphatidylinositol-4-phosphate 5-kinase [EC:2.7.1.68] | (RefSeq) phosphatidylinositol 4-phosphate 5-kinase 6-like	Inositol phosphate metabolism (ko00562);; Phosphatidylinositol signaling system (ko04070);; Endocytosis (ko04144)	[R]	General function prediction only	Ankyrin repeats (3 copies)	--	S	Function unknown	protein ACCELERATED CELL DEATH 6 [Populus trichocarpa]
gene-POPTR_002G196700	--	7.28269	6.61036	7.5525	42.6509	42.056	42.6481	6.2074e-196	2.61441	up	[T]	Signal transduction mechanisms	Molecular Function: nucleotide binding (GO:0000166);; Molecular Function: molecular_function (GO:0003674);; Molecular Function: binding (GO:0005488);; Cellular Component: cellular_component (GO:0005575);; Cellular Component: cell (GO:0005623);; Cellular Component: plasma membrane (GO:0005886);; Molecular Function: drug binding (GO:0008144);; Cellular Component: membrane (GO:0016020);; Molecular F…	--	--	--	--	Universal stress protein family	--	T	Signal transduction mechanisms	universal stress protein A-like protein isoform X2 [Populus trichocarpa]
gene-POPTR_001G332500	Y-2	19.2198	20.2741	18.0154	79.6566	85.4932	79.2824	1.37356e-231	2.14562	up	--	--	Cellular Component: cellular_component (GO:0005575);; Cellular Component: cell (GO:0005623);; Cellular Component: plasma membrane (GO:0005886);; Cellular Component: membrane (GO:0016020);; Cellular Component: cell part (GO:0044464);; Cellular Component: cell periphery (GO:0071944);;	--	--	--	--	--	Uncharacterized protein At3g27210 OS=Arabidopsis thaliana OX=3702 GN=Y-2 PE=1 SV=1	S	Function unknown	uncharacterized protein At3g27210 isoform X1 [Populus trichocarpa]
gene-POPTR_019G116700	--	6.53216	6.24683	5.53108	45.8838	47.276	45.2983	2.04539e-210	2.95751	up	--	--	--	--	--	--	--	Wound-induced protein	--	--	--	unknown [Populus trichocarpa x Populus deltoides]
gene-POPTR_013G007500	--	1.28994	1.67691	1.87668	3.78096	3.68155	3.36641	4.53189e-08	1.18992	up	--	--	--	--	--	--	--	--	--	--	--	hypothetical protein POPTR_013G007500 [Populus trichocarpa]
gene-POPTR_010G191000	LAX2	4.10736	3.99208	4.34079	16.6168	16.8675	15.4836	8.04128e-227	2.02308	up	--	--	Cellular Component: integral component of membrane (GO:0016021);;	K13946|4.0e-237|pop:7490334|K13946 auxin influx carrier (AUX1 LAX family) | (RefSeq) auxin transporter-like protein 2 isoform X1	Plant hormone signal transduction (ko04075)	[E]	Amino acid transport and metabolism	Transmembrane amino acid transporter protein	Auxin transporter-like protein 2 OS=Medicago truncatula OX=3880 GN=LAX2 PE=2 SV=1	E	Amino acid transport and metabolism	auxin transporter-like protein 2 isoform X2 [Populus trichocarpa]
gene-POPTR_008G152201	--	0.258953	0.177309	0.042547	1.38495	1.62515	2.35418	5.18475e-13	3.211	up	--	--	--	--	--	--	--	--	--	--	--	uncharacterized protein LOC18101551 [Populus trichocarpa]
gene-POPTR_004G160600	SHI	0.42454	0.380748	0.504387	1.2353	1.3767	1.42308	5.18147e-09	1.6152	up	--	--	--	--	--	--	--	Domain of unknown function (DUF702)	Protein SHORT INTERNODES OS=Arabidopsis thaliana OX=3702 GN=SHI PE=1 SV=1	S	Function unknown	protein SHORT INTERNODES [Populus trichocarpa]
gene-POPTR_013G102200	GXM3	2.8121	2.52714	2.52977	5.08675	5.33833	5.84228	3.42197e-14	1.08918	up	[R]	General function prediction only	Cellular Component: Golgi apparatus (GO:0005794);; Biological Process: plant-type secondary cell wall biogenesis (GO:0009834);; Molecular Function: glucuronoxylan 4-O-methyltransferase activity (GO:0030775);; Biological Process: xylan metabolic process (GO:0045491);; Biological Process: xylan biosynthetic process (GO:0045492);;	K18801|2.6e-172|pop:18104325|K18801 glucuronoxylan 4-O-methyltransferase [EC:2.1.1.112] | (RefSeq) glucuronoxylan 4-O-methyltransferase 3	--	--	--	Polysaccharide biosynthesis	Glucuronoxylan 4-O-methyltransferase 3 OS=Arabidopsis thaliana OX=3702 GN=GXM3 PE=1 SV=1	S	Function unknown	glucuronoxylan 4-O-methyltransferase 3 [Populus trichocarpa]
gene-POPTR_005G109600	--	0.407476	0.626857	0.742637	2.34132	4.15257	4.1886	9.59076e-25	2.77194	up	--	--	Molecular Function: molecular_function (GO:0003674);; Molecular Function: binding (GO:0005488);; Molecular Function: protein binding (GO:0005515);; Molecular Function: ubiquitin-like protein binding (GO:0032182);; Molecular Function: SUMO binding (GO:0032183);; Molecular Function: SUMO polymer binding (GO:0032184);;	K16285|8.3e-10|cic:CICLE_v10032987mg|K16285 RING/U-box domain-containing protein [EC:2.3.2.27] | (RefSeq) hypothetical protein	--	[O]	Posttranslational modification, protein turnover, chaperones	Ring finger domain	--	O	Posttranslational modification, protein turnover, chaperones	RING-H2 finger protein ATL72 [Populus trichocarpa]
gene-POPTR_004G234200	--	1.37255	1.45399	1.98149	3.57406	5.41557	3.4905	3.7593e-07	1.38278	up	--	--	--	--	--	--	--	--	--	--	--	hypothetical protein POPTR_004G234200 [Populus trichocarpa]
gene-POPTR_005G251600	CAT1	18.9359	20.2945	22.7085	42.4026	43.6313	40.901	1.96845e-59	1.08719	up	[P]	Inorganic ion transport and metabolism	Molecular Function: catalase activity (GO:0004096);; Biological Process: response to oxidative stress (GO:0006979);; Molecular Function: heme binding (GO:0020037);; Biological Process: hydrogen peroxide catabolic process (GO:0042744);; Molecular Function: metal ion binding (GO:0046872);;	K03781|8.1e-301|pop:7494699|K03781 catalase [EC:1.11.1.6] | (RefSeq) catalase isozyme 1	Tryptophan metabolism (ko00380);; Glyoxylate and dicarboxylate metabolism (ko00630);; Carbon metabolism (ko01200);; MAPK signaling pathway - plant (ko04016);; Peroxisome (ko04146)	[P]	Inorganic ion transport and metabolism	Catalase	Catalase isozyme 1 OS=Gossypium hirsutum OX=3635 GN=CAT1 PE=2 SV=2	P	Inorganic ion transport and metabolism	catalase isozyme 1 [Populus trichocarpa]
gene-POPTR_012G002700	PP2C51	2.34523	1.89014	2.1886	8.25442	6.99229	8.56311	3.91984e-42	1.92891	up	[T]	Signal transduction mechanisms	Molecular Function: protein serine/threonine phosphatase activity (GO:0004722);; Molecular Function: metal ion binding (GO:0046872);;	K14497|2.5e-206|pop:7489826|K14497 protein phosphatase 2C [EC:3.1.3.16] | (RefSeq) probable protein phosphatase 2C 51	MAPK signaling pathway - plant (ko04016);; Plant hormone signal transduction (ko04075)	[T]	Signal transduction mechanisms	Protein phosphatase 2C	Protein phosphatase 2C 51 OS=Oryza sativa subsp. japonica OX=39947 GN=PP2C51 PE=1 SV=1	T	Signal transduction mechanisms	probable protein phosphatase 2C 51 [Populus trichocarpa]
gene-POPTR_019G022100	BAMT	4.1566	4.54065	4.06213	8.25902	10.2008	7.28525	5.44125e-09	1.05159	up	--	--	Molecular Function: S-adenosylmethionine-dependent methyltransferase activity (GO:0008757);; Biological Process: methylation (GO:0032259);;	K21482|3.5e-106|pop:7487202|K21482 benzoate O-methyltransferase [EC:2.1.1.273] | (RefSeq) benzoate carboxyl methyltransferase	--	--	--	SAM dependent carboxyl methyltransferase	Benzoate carboxyl methyltransferase OS=Antirrhinum majus OX=4151 GN=BAMT PE=1 SV=1	S	Function unknown	benzoate carboxyl methyltransferase [Populus trichocarpa]
gene-POPTR_015G025500	--	8.02555	8.66512	5.52731	14.7472	13.2861	15.6621	2.08891e-10	1.01279	up	--	--	Cellular Component: plasma membrane (GO:0005886);;	--	--	--	--	Cysteine-rich TM module stress tolerance	--	--	--	hypothetical protein POPTR_015G025500 [Populus trichocarpa]
gene-POPTR_017G013900	NAAT1	0.625681	0.501546	0.422644	1.51917	1.34763	1.50836	4.1748e-08	1.49072	up	[E]	Amino acid transport and metabolism	Biological Process: cellular amino acid metabolic process (GO:0006520);; Molecular Function: transaminase activity (GO:0008483);; Biological Process: biosynthetic process (GO:0009058);; Molecular Function: pyridoxal phosphate binding (GO:0030170);;	K00815|2.8e-246|pop:18106788|K00815 tyrosine aminotransferase [EC:2.6.1.5] | (RefSeq) probable aminotransferase TAT2	Ubiquinone and other terpenoid-quinone biosynthesis (ko00130);; Cysteine and methionine metabolism (ko00270);; Tyrosine metabolism (ko00350);; Phenylalanine metabolism (ko00360);; Phenylalanine, tyrosine and tryptophan biosynthesis (ko00400);; Isoquinoline alkaloid biosynthesis (ko00950);; Tropane, piperidine and pyridine alkaloid biosynthesis (ko00960)	[E]	Amino acid transport and metabolism	Aminotransferase class I and II	Nicotianamine aminotransferase 1 OS=Oryza sativa subsp. japonica OX=39947 GN=NAAT1 PE=1 SV=1	E	Amino acid transport and metabolism	probable aminotransferase TAT2 [Populus trichocarpa]
gene-POPTR_010G242600	--	22.2154	19.8738	20.7257	60.7821	61.4923	58.606	6.30427e-136	1.57535	up	[Q]	Secondary metabolites biosynthesis, transport and catabolism	Molecular Function: urate oxidase activity (GO:0004846);; Cellular Component: peroxisome (GO:0005777);; Biological Process: purine nucleobase metabolic process (GO:0006144);; Biological Process: urate catabolic process (GO:0019628);;	K00365|3.9e-176|pop:7491607|K00365 urate oxidase [EC:1.7.3.3] | (RefSeq) uricase-2 isozyme 1	Purine metabolism (ko00230);; Caffeine metabolism (ko00232)	[Q]	Secondary metabolites biosynthesis, transport and catabolism	Uricase	Uricase-2 isozyme 1 OS=Canavalia lineata OX=28957 PE=2 SV=1	Q	Secondary metabolites biosynthesis, transport and catabolism	uricase-2 isozyme 1 [Populus trichocarpa]
gene-POPTR_015G129700	EXL3	26.3624	26.9046	28.3288	70.8108	65.2788	61.5547	6.40156e-99	1.32764	up	--	--	Cellular Component: cellular_component (GO:0005575);; Cellular Component: cell wall (GO:0005618);; Cellular Component: cell (GO:0005623);; Cellular Component: cell-cell junction (GO:0005911);; Biological Process: biological_process (GO:0008150);; Cellular Component: plant-type cell wall (GO:0009505);; Cellular Component: plasmodesma (GO:0009506);; Biological Process: response to abiotic stimulus …	--	--	--	--	Phosphate-induced protein 1 conserved region	Protein EXORDIUM-like 3 OS=Arabidopsis thaliana OX=3702 GN=EXL3 PE=2 SV=1	S	Function unknown	protein EXORDIUM-like 3 [Populus trichocarpa]
gene-POPTR_T046200	CLC-C	3.99985	4.13236	4.81207	15.523	16.8341	14.894	1.79955e-119	1.91789	up	[T]	Signal transduction mechanisms	Molecular Function: voltage-gated chloride channel activity (GO:0005247);; Cellular Component: plant-type vacuole membrane (GO:0009705);; Molecular Function: chloride transmembrane transporter activity (GO:0015108);; Cellular Component: integral component of membrane (GO:0016021);; Molecular Function: transmembrane transporter activity (GO:0022857);; Cellular Component: intracellular membrane-bou…	K05016|0.0e+00|pop:18109954|K05016 chloride channel 7 | (RefSeq) chloride channel protein CLC-c isoform X1	--	[P]	Inorganic ion transport and metabolism	Voltage gated chloride channel	Chloride channel protein CLC-c OS=Arabidopsis thaliana OX=3702 GN=CLC-C PE=1 SV=1	P	Inorganic ion transport and metabolism	chloride channel protein CLC-c isoform X1 [Populus trichocarpa]
gene-POPTR_016G133900	CIPK14	1.7655	1.7169	2.48386	4.85073	4.84597	4.3976	1.92643e-18	1.28407	up	[T]	Signal transduction mechanisms	Molecular Function: protein serine/threonine kinase activity (GO:0004674);; Molecular Function: ATP binding (GO:0005524);; Biological Process: signal transduction (GO:0007165);;	K12761|9.6e-250|pop:7482576|K12761 carbon catabolite-derepressing protein kinase [EC:2.7.11.1] | (RefSeq) CBL-interacting serine/threonine-protein kinase 14	--	[T]	Signal transduction mechanisms	Protein kinase domain	CBL-interacting serine/threonine-protein kinase 14 OS=Arabidopsis thaliana OX=3702 GN=CIPK14 PE=1 SV=1	T	Signal transduction mechanisms	CBL-interacting serine/threonine-protein kinase 14 [Populus trichocarpa]
gene-POPTR_001G010500	SINAT2	6.17114	7.44128	7.71343	14.2007	16.1714	15.1702	3.36566e-42	1.17984	up	--	--	Cellular Component: cytoplasm (GO:0005737);; Biological Process: ubiquitin-dependent protein catabolic process (GO:0006511);; Biological Process: multicellular organism development (GO:0007275);; Molecular Function: zinc ion binding (GO:0008270);; Cellular Component: host cell nucleus (GO:0042025);; Molecular Function: ubiquitin protein ligase activity (GO:0061630);;	K04506|1.1e-172|pop:7455750|K04506 E3 ubiquitin-protein ligase SIAH1 [EC:2.3.2.27] | (RefSeq) E3 ubiquitin-protein ligase SINAT2	Ubiquitin mediated proteolysis (ko04120)	[R]	General function prediction only	Seven in absentia protein family	E3 ubiquitin-protein ligase SINAT2 OS=Arabidopsis thaliana OX=3702 GN=SINAT2 PE=1 SV=1	O	Posttranslational modification, protein turnover, chaperones	E3 ubiquitin-protein ligase SINAT2 [Populus trichocarpa]
gene-POPTR_004G212900	--	0	0	0	26.7192	31.4271	38.2673	7.46405e-58	9.15261	up	--	--	--	--	--	--	--	--	--	L	Replication, recombination and repair	hybrid signal transduction histidine kinase M [Populus trichocarpa]
gene-POPTR_007G088200	CYP89A2	0.638569	0.695107	0.76319	1.59374	1.9963	1.52517	2.71585e-08	1.30701	up	[QV]	Secondary metabolites biosynthesis, transport and catabolism;; Defense mechanisms	Molecular Function: iron ion binding (GO:0005506);; Cellular Component: membrane (GO:0016020);; Molecular Function: oxidoreductase activity, acting on paired donors, with incorporation or reduction of molecular oxygen, NAD(P)H as one donor, and incorporation of one atom of oxygen (GO:0016709);; Molecular Function: heme binding (GO:0020037);;	K24184|5.6e-297|pop:18100955|K24184 cytochrome P450 family 89 subfamily A [EC:1.14.-.-] | (RefSeq) cytochrome P450 89A2	--	[Q]	Secondary metabolites biosynthesis, transport and catabolism	Cytochrome P450	Cytochrome P450 89A2 OS=Arabidopsis thaliana OX=3702 GN=CYP89A2 PE=2 SV=2	Q	Secondary metabolites biosynthesis, transport and catabolism	cytochrome P450 89A2 [Populus trichocarpa]
gene-POPTR_004G087300	--	15.6676	17.757	17.2736	49.1628	46.5044	46.1753	6.40633e-108	1.53417	up	[R]	General function prediction only	--	K03549|3.0e-27|csat:104769726|K03549 KUP system potassium uptake protein | (RefSeq) potassium transporter 8-like isoform X1	--	--	--	--	--	S	Function unknown	uncharacterized protein LOC7493556 isoform X1 [Populus trichocarpa]
gene-POPTR_T091800	--	8.58294	8.62081	12.0053	25.8672	27.4395	31.6955	2.84121e-39	1.58782	up	[Q]	Secondary metabolites biosynthesis, transport and catabolism	--	K07253|6.7e-57|pop:18110655|K07253 phenylpyruvate tautomerase [EC:5.3.2.1] | (RefSeq) macrophage migration inhibitory factor homolog	Tyrosine metabolism (ko00350);; Phenylalanine metabolism (ko00360)	[V]	Defense mechanisms	Macrophage migration inhibitory factor (MIF)	--	V	Defense mechanisms	macrophage migration inhibitory factor homolog [Populus trichocarpa]
gene-POPTR_012G105700	--	16.2054	15.1775	17.2694	33.6477	36.0258	35.9582	2.34688e-48	1.16918	up	[IQR]	Lipid transport and metabolism;; Secondary metabolites biosynthesis, transport and catabolism;; General function prediction only	--	K09841|1.3e-47|lja:Lj0g3v0091119.1|K09841 xanthoxin dehydrogenase [EC:1.1.1.288] | (RefSeq) Lj0g3v0091119.1; -	Carotenoid biosynthesis (ko00906)	[R]	General function prediction only	Enoyl-(Acyl carrier protein) reductase	(-)-isopiperitenol/(-)-carveol dehydrogenase, mitochondrial OS=Mentha piperita OX=34256 PE=1 SV=1	Q	Secondary metabolites biosynthesis, transport and catabolism	(-)-isopiperitenol/(-)-carveol dehydrogenase, mitochondrial [Populus trichocarpa]
gene-POPTR_001G320000	GAE6	37.0488	37.3842	40.7005	103.864	102.373	102.141	2.82302e-209	1.47372	up	[M]	Cell wall/membrane/envelope biogenesis	Molecular Function: catalytic activity (GO:0003824);; Cellular Component: integral component of membrane (GO:0016021);;	K08679|7.8e-258|pop:7495839|K08679 UDP-glucuronate 4-epimerase [EC:5.1.3.6] | (RefSeq) UDP-glucuronate 4-epimerase 6	Amino sugar and nucleotide sugar metabolism (ko00520)	[M]	Cell wall/membrane/envelope biogenesis	GDP-mannose 4,6 dehydratase	UDP-glucuronate 4-epimerase 6 OS=Arabidopsis thaliana OX=3702 GN=GAE6 PE=1 SV=1	M	Cell wall/membrane/envelope biogenesis	UDP-glucuronate 4-epimerase 6 [Populus trichocarpa]
gene-POPTR_013G158500	PTI6	1.08766	1.02887	1.32342	5.6109	4.51731	4.68008	8.60637e-40	2.1359	up	--	--	Molecular Function: DNA binding (GO:0003677);; Molecular Function: transcription factor activity, sequence-specific DNA binding (GO:0003700);; Cellular Component: nucleus (GO:0005634);;	K13434|7.4e-165|pop:7464740|K13434 pathogenesis-related genes transcriptional activator PTI6 | (RefSeq) pathogenesis-related genes transcriptional activator PTI6	Plant-pathogen interaction (ko04626)	--	--	AP2 domain	Pathogenesis-related genes transcriptional activator PTI6 OS=Solanum lycopersicum OX=4081 GN=PTI6 PE=2 SV=1	K	Transcription	pathogenesis-related genes transcriptional activator PTI6 [Populus trichocarpa]
gene-POPTR_002G071100	GLTP3	0.783349	0.71504	0.818063	5.91777	5.78342	6.24454	1.90876e-73	2.97454	up	--	--	Cellular Component: cytosol (GO:0005829);; Molecular Function: lipid binding (GO:0008289);; Cellular Component: membrane (GO:0016020);; Biological Process: ceramide transport (GO:0035627);; Biological Process: intermembrane lipid transfer (GO:0120009);; Molecular Function: ceramide 1-phosphate binding (GO:1902387);; Molecular Function: ceramide 1-phosphate transporter activity (GO:1902388);;	--	--	[G]	Carbohydrate transport and metabolism	Glycolipid transfer protein (GLTP)	Glycolipid transfer protein 3 OS=Arabidopsis thaliana OX=3702 GN=GLTP3 PE=2 SV=1	G	Carbohydrate transport and metabolism	hypothetical protein POPTR_002G071100 [Populus trichocarpa]
gene-POPTR_003G204400	BZIP24	5.70412	5.59492	5.46584	16.4926	17.8164	17.3125	3.73702e-63	1.57618	up	--	--	Molecular Function: transcription factor activity, sequence-specific DNA binding (GO:0003700);;	--	--	--	--	Basic region leucine zipper	Basic leucine zipper 24 OS=Arabidopsis thaliana OX=3702 GN=BZIP24 PE=1 SV=1	K	Transcription	basic leucine zipper 23 isoform X1 [Populus trichocarpa]
gene-POPTR_001G451100	OMT1	0.92621	0.957192	1.16108	13.7051	15.457	15.2095	4.69573e-164	3.88124	up	[H]	Coenzyme transport and metabolism	Molecular Function: O-methyltransferase activity (GO:0008171);; Molecular Function: S-adenosylmethionine-dependent methyltransferase activity (GO:0008757);; Biological Process: aromatic compound biosynthetic process (GO:0019438);; Biological Process: methylation (GO:0032259);; Molecular Function: protein dimerization activity (GO:0046983);;	K13066|7.6e-211|pop:7491420|K13066 caffeic acid 3-O-methyltransferase [EC:2.1.1.68] | (RefSeq) caffeic acid 3-O-methyltransferase 1	Phenylpropanoid biosynthesis (ko00940)	[R]	General function prediction only	O-methyltransferase domain	Caffeic acid 3-O-methyltransferase 1 OS=Populus tremuloides OX=3693 GN=OMT1 PE=1 SV=1	S	Function unknown	caffeic acid 3-O-methyltransferase 1 [Populus trichocarpa]
gene-POPTR_004G036600	SCAMP5	9.44502	9.23479	8.63895	36.4508	35.3308	35.1106	3.03189e-194	2.01539	up	--	--	Cellular Component: plasma membrane (GO:0005886);; Biological Process: protein transport (GO:0015031);; Cellular Component: integral component of membrane (GO:0016021);; Cellular Component: transport vesicle membrane (GO:0030658);;	K19995|1.4e-127|pop:7485580|K19995 secretory carrier-associated membrane protein | (RefSeq) secretory carrier-associated membrane protein 3	--	[U]	Intracellular trafficking, secretion, and vesicular transport	SCAMP family	Secretory carrier-associated membrane protein 5 OS=Arabidopsis thaliana OX=3702 GN=SCAMP5 PE=2 SV=2	U	Intracellular trafficking, secretion, and vesicular transport	hypothetical protein POPTR_004G036600 [Populus trichocarpa]
gene-POPTR_004G121800	CDF3	1.08871	1.42811	1.30981	8.60617	8.95561	8.84554	8.86023e-113	2.82116	up	--	--	Molecular Function: DNA binding (GO:0003677);; Molecular Function: transcription factor activity, sequence-specific DNA binding (GO:0003700);; Cellular Component: nucleus (GO:0005634);;	K16222|1.4e-61|csat:104726841|K16222 Dof zinc finger protein DOF5.5 | (RefSeq) cyclic dof factor 1-like	Circadian rhythm - plant (ko04712)	--	--	Dof domain, zinc finger	Cyclic dof factor 3 OS=Arabidopsis thaliana OX=3702 GN=CDF3 PE=1 SV=2	K	Transcription	cyclic dof factor 3 [Populus trichocarpa]
gene-POPTR_011G066400	LSH10	1.049	0.556495	0.613273	2.88577	2.86258	3.31622	8.81775e-17	2.02452	up	--	--	--	K13413|1.1e-50|sbi:110435403|K13413 mitogen-activated protein kinase kinase 4/5 [EC:2.7.12.2] | (RefSeq) mitogen-activated protein kinase kinase 5-like	MAPK signaling pathway - plant (ko04016);; Plant hormone signal transduction (ko04075);; Plant-pathogen interaction (ko04626)	--	--	Protein of unknown function (DUF640)	Protein LIGHT-DEPENDENT SHORT HYPOCOTYLS 10 OS=Arabidopsis thaliana OX=3702 GN=LSH10 PE=1 SV=1	S	Function unknown	protein LIGHT-DEPENDENT SHORT HYPOCOTYLS 10 [Populus trichocarpa]
gene-POPTR_002G260100	At2g16250	11.2073	11.1063	12.4869	45.9047	41.8058	44.0413	8.87878e-229	1.96566	up	--	--	Molecular Function: transmembrane receptor protein serine/threonine kinase activity (GO:0004675);; Molecular Function: ATP binding (GO:0005524);; Cellular Component: plasma membrane (GO:0005886);; Biological Process: protein phosphorylation (GO:0006468);; Cellular Component: integral component of membrane (GO:0016021);;	K13459|7.5e-39|jcu:105635047|K13459 disease resistance protein RPS2 | (RefSeq) probable disease resistance protein At1g12280 isoform X1	Plant-pathogen interaction (ko04626)	--	--	Leucine rich repeat	Probable LRR receptor-like serine/threonine-protein kinase At2g16250 OS=Arabidopsis thaliana OX=3702 GN=At2g16250 PE=1 SV=1	T	Signal transduction mechanisms	probable LRR receptor-like serine/threonine-protein kinase At2g16250 [Populus trichocarpa]
gene-POPTR_016G083900	RVE8	0.98752	1.41372	1.15774	15.9619	13.2048	12.191	1.15135e-132	3.54006	up	--	--	Molecular Function: DNA binding (GO:0003677);; Cellular Component: nucleus (GO:0005634);;	K12133|1.4e-27|ppp:112280611|K12133 MYB-related transcription factor LHY | (RefSeq) uncharacterized protein LOC112280611	Circadian rhythm - plant (ko04712)	[O]	Posttranslational modification, protein turnover, chaperones	Myb-like DNA-binding domain	Protein REVEILLE 8 OS=Arabidopsis thaliana OX=3702 GN=RVE8 PE=2 SV=1	K	Transcription	protein REVEILLE 8 isoform X1 [Populus trichocarpa]
gene-POPTR_001G216000	At5g22090	4.59769	4.65219	4.54018	48.8325	47.0837	44.5111	0	3.39413	up	--	--	--	--	--	--	--	Fantastic Four meristem regulator	Protein FAF-like, chloroplastic OS=Arabidopsis thaliana OX=3702 GN=At5g22090 PE=2 SV=1	S	Function unknown	protein FAF-like, chloroplastic [Populus trichocarpa]
gene-POPTR_001G216600	BLH1	10.6439	10.9473	11.7067	50.3996	50.8314	49.7475	0	2.23188	up	--	--	Molecular Function: RNA polymerase II core promoter proximal region sequence-specific DNA binding (GO:0000978);; Molecular Function: RNA polymerase II transcription factor activity, sequence-specific DNA binding (GO:0000981);; Cellular Component: nucleus (GO:0005634);; Biological Process: regulation of transcription from RNA polymerase II promoter (GO:0006357);;	--	--	[K]	Transcription	Associated with HOX	BEL1-like homeodomain protein 1 OS=Arabidopsis thaliana OX=3702 GN=BLH1 PE=1 SV=1	K	Transcription	BEL1-like homeodomain protein 1 [Populus trichocarpa]
gene-POPTR_003G133700	FIGL1	0.298517	0.395575	0.389386	1.66512	1.19918	1.26611	2.26862e-16	1.86948	up	[O]	Posttranslational modification, protein turnover, chaperones	Molecular Function: ATP binding (GO:0005524);;	K03231|2.7e-123|mtr:MTR_1g101870|K03231 elongation factor 1-alpha | (RefSeq) elongation factor 1-alpha	RNA transport (ko03013)	[O]	Posttranslational modification, protein turnover, chaperones	ATPase family associated with various cellular activities (AAA)	ATPase family AAA domain-containing protein FIGL1 OS=Arabidopsis thaliana OX=3702 GN=FIGL1 PE=2 SV=2	O	Posttranslational modification, protein turnover, chaperones	putative cell division cycle ATPase isoform X1 [Populus trichocarpa]
gene-POPTR_010G078400	AUX22D	6.99402	6.07508	6.76331	19.3504	20.6928	17.4448	6.7913e-61	1.5819	up	--	--	Cellular Component: nucleus (GO:0005634);; Biological Process: regulation of transcription, DNA-templated (GO:0006355);; Biological Process: auxin-activated signaling pathway (GO:0009734);;	K14484|8.5e-89|pop:7467523|K14484 auxin-responsive protein IAA | (RefSeq) auxin-induced protein 22D	Plant hormone signal transduction (ko04075)	--	--	AUX/IAA family	Auxin-induced protein 22D OS=Vigna radiata var. radiata OX=3916 GN=AUX22D PE=2 SV=1	K	Transcription	hypothetical protein POPTR_010G078400 [Populus trichocarpa]
gene-POPTR_019G053200	--	9.79331	9.8349	11.3899	25.1918	26.1185	23.7201	9.32497e-73	1.34098	up	--	--	Molecular Function: metal ion binding (GO:0046872);;	K13832|1.6e-12|boe:106335320|K13832 3-dehydroquinate dehydratase / shikimate dehydrogenase [EC:4.2.1.10 1.1.1.25] | (RefSeq) bifunctional 3-dehydroquinate dehydratase/shikimate dehydrogenase, chloroplastic-like isoform X1	Phenylalanine, tyrosine and tryptophan biosynthesis (ko00400);; Biosynthesis of amino acids (ko01230)	[R]	General function prediction only	Zinc finger C-x8-C-x5-C-x3-H type (and similar)	Zinc finger CCCH domain-containing protein ZFN-like OS=Pisum sativum OX=3888 PE=2 SV=1	S	Function unknown	zinc finger CCCH domain-containing protein ZFN-like isoform X1 [Populus trichocarpa]
gene-POPTR_008G140700	NHX7	6.65848	7.02729	6.82647	15.5336	16.4514	15.2448	1.05465e-86	1.25997	up	[T]	Signal transduction mechanisms	Cellular Component: plasma membrane (GO:0005886);; Cellular Component: chloroplast envelope (GO:0009941);; Molecular Function: sodium:proton antiporter activity (GO:0015385);; Molecular Function: potassium:proton antiporter activity (GO:0015386);; Cellular Component: integral component of membrane (GO:0016021);; Biological Process: regulation of intracellular pH (GO:0051453);; Biological Process:…	K14726|2.1e-41|cme:CYME_CMS152C|K14726 solute carrier family 9 (sodium/hydrogen exchanger), member 10/11 | (RefSeq) probable sodium/hydrogen antiporter	--	[P]	Inorganic ion transport and metabolism	Sodium/hydrogen exchanger family	Sodium/hydrogen exchanger 7 OS=Arabidopsis thaliana OX=3702 GN=NHX7 PE=1 SV=1	P	Inorganic ion transport and metabolism	sodium/hydrogen exchanger 8 isoform X1 [Populus trichocarpa]
gene-POPTR_001G239650	pKIWI504	101.786	96.6091	83.0831	292.238	321.843	300.446	1.15908e-118	1.7467	up	--	--	Molecular Function: metal ion binding (GO:0046872);;	--	--	--	--	Metallothionein	Metallothionein-like protein type 2 OS=Actinidia deliciosa OX=3627 GN=pKIWI504 PE=2 SV=1	S	Function unknown	metallothionein-like protein type 2 [Populus trichocarpa]
gene-POPTR_009G142200	CHI2	1.01601	1.1688	1.38492	8.89747	8.3853	8.28741	8.15465e-71	2.85864	up	[G]	Carbohydrate transport and metabolism	Molecular Function: chitinase activity (GO:0004568);; Biological Process: carbohydrate metabolic process (GO:0005975);; Biological Process: chitin catabolic process (GO:0006032);; Biological Process: cell wall macromolecule catabolic process (GO:0016998);; Biological Process: defense response to fungus (GO:0050832);;	K20547|1.9e-127|pop:7474965|K20547 basic endochitinase B [EC:3.2.1.14] | (RefSeq) basic endochitinase	Amino sugar and nucleotide sugar metabolism (ko00520);; MAPK signaling pathway - plant (ko04016)	[R]	General function prediction only	Chitinase class I	Endochitinase A2 OS=Pisum sativum OX=3888 GN=CHI2 PE=1 SV=2	S	Function unknown	hypothetical protein POPTR_009G142200 [Populus trichocarpa]
gene-POPTR_001G025100	LNK2	21.25	20.4519	22.3377	89.595	90.056	88.6417	0	2.11786	up	--	--	Biological Process: regulation of transcription, DNA-templated (GO:0006355);; Biological Process: circadian rhythm (GO:0007623);;	--	--	--	--	--	Protein LNK2 OS=Arabidopsis thaliana OX=3702 GN=LNK2 PE=1 SV=1	S	Function unknown	protein LNK2 isoform X3 [Populus trichocarpa]
gene-POPTR_010G113500	QPT	0.824589	0.470066	0.897871	1.95577	1.94599	1.11223	5.23894e-05	1.20131	up	[H]	Coenzyme transport and metabolism	Molecular Function: nicotinate-nucleotide diphosphorylase (carboxylating) activity (GO:0004514);; Biological Process: NAD biosynthetic process (GO:0009435);;	K00767|1.3e-85|hbr:110671922|K00767 nicotinate-nucleotide pyrophosphorylase (carboxylating) [EC:2.4.2.19] | (RefSeq) nicotinate-nucleotide pyrophosphorylase [carboxylating], chloroplastic isoform X1	Nicotinate and nicotinamide metabolism (ko00760)	[F]	Nucleotide transport and metabolism	Quinolinate phosphoribosyl transferase, C-terminal domain	Nicotinate-nucleotide pyrophosphorylase [carboxylating], chloroplastic OS=Arabidopsis thaliana OX=3702 GN=QPT PE=2 SV=2	F	Nucleotide transport and metabolism	hypothetical protein POPTR_010G113500 [Populus trichocarpa]
gene-POPTR_005G026700	SRC2	1.04739	1.12275	0.735844	5.09413	6.63722	6.8013	3.56966e-39	2.66475	up	--	--	--	--	--	--	--	C2 domain	Protein SRC2 homolog OS=Arabidopsis thaliana OX=3702 GN=SRC2 PE=1 SV=1	--	--	protein SRC2 homolog [Populus trichocarpa]
gene-POPTR_008G130400	SULTR3;3	44.3407	38.4869	42.8874	88.9838	91.0684	84.7408	5.86635e-92	1.12645	up	[P]	Inorganic ion transport and metabolism	Cellular Component: integral component of plasma membrane (GO:0005887);; Molecular Function: secondary active sulfate transmembrane transporter activity (GO:0008271);; Molecular Function: anion:anion antiporter activity (GO:0015301);;	K17471|0.0e+00|pop:7488404|K17471 sulfate transporter 3 | (RefSeq) probable sulfate transporter 3.3 isoform X1	--	[P]	Inorganic ion transport and metabolism	Sulfate permease family	Probable sulfate transporter 3.3 OS=Arabidopsis thaliana OX=3702 GN=SULTR3;3 PE=2 SV=2	P	Inorganic ion transport and metabolism	probable sulfate transporter 3.3 isoform X1 [Populus trichocarpa]
gene-POPTR_001G364000	SAT3	5.34727	4.13478	5.80716	17.5205	17.1284	18.1351	1.13297e-60	1.83291	up	[E]	Amino acid transport and metabolism	Cellular Component: cytosol (GO:0005829);; Biological Process: cysteine biosynthetic process from serine (GO:0006535);; Molecular Function: serine O-acetyltransferase activity (GO:0009001);;	K00640|2.3e-182|pop:7485103|K00640 serine O-acetyltransferase [EC:2.3.1.30] | (RefSeq) serine acetyltransferase 1, chloroplastic	Cysteine and methionine metabolism (ko00270);; Sulfur metabolism (ko00920);; Carbon metabolism (ko01200);; Biosynthesis of amino acids (ko01230)	[E]	Amino acid transport and metabolism	Serine acetyltransferase, N-terminal	Serine acetyltransferase 3, mitochondrial OS=Arabidopsis thaliana OX=3702 GN=SAT3 PE=1 SV=3	E	Amino acid transport and metabolism	serine acetyltransferase 1, chloroplastic [Populus trichocarpa]
gene-POPTR_005G064100	NAC104	2.36934	2.37957	1.99992	9.97337	11.695	9.94523	3.62277e-47	2.25045	up	--	--	Molecular Function: DNA binding (GO:0003677);; Cellular Component: nucleus (GO:0005634);; Biological Process: regulation of transcription, DNA-templated (GO:0006355);; Biological Process: system development (GO:0048731);;	--	--	--	--	No apical meristem (NAM) protein	NAC domain-containing protein 104 OS=Arabidopsis thaliana OX=3702 GN=NAC104 PE=2 SV=1	K	Transcription	NAC domain-containing protein 104 [Populus trichocarpa]
gene-POPTR_005G015400	SAR1A	1.26219	2.07461	1.9123	3.97151	4.62549	4.66796	2.09193e-10	1.36331	up	[R]	General function prediction only	Biological Process: regulation of COPII vesicle coating (GO:0003400);; Molecular Function: GTPase activity (GO:0003924);; Molecular Function: GTP binding (GO:0005525);; Cellular Component: endoplasmic reticulum (GO:0005783);; Cellular Component: Golgi apparatus (GO:0005794);; Biological Process: intracellular protein transport (GO:0006886);; Biological Process: ER to Golgi vesicle-mediated transp…	K07953|2.4e-107|pop:18098603|K07953 GTP-binding protein SAR1 [EC:3.6.5.-] | (RefSeq) GTP-binding protein SAR1A	Protein processing in endoplasmic reticulum (ko04141)	[U]	Intracellular trafficking, secretion, and vesicular transport	ADP-ribosylation factor family	GTP-binding protein SAR1A OS=Arabidopsis thaliana OX=3702 GN=SAR1A PE=2 SV=1	U	Intracellular trafficking, secretion, and vesicular transport	GTP-binding protein SAR1A [Populus trichocarpa]
gene-POPTR_010G063000	C/VIF1	0.934143	1.92117	0.440092	83.3418	84.2227	82.6837	1.73429e-27	5.57827	up	--	--	Molecular Function: enzyme inhibitor activity (GO:0004857);; Biological Process: negative regulation of catalytic activity (GO:0043086);;	--	--	--	--	Plant invertase/pectin methylesterase inhibitor	Cell wall / vacuolar inhibitor of fructosidase 1 OS=Arabidopsis thaliana OX=3702 GN=C/VIF1 PE=1 SV=1	S	Function unknown	cell wall / vacuolar inhibitor of fructosidase 1 [Populus trichocarpa]
gene-POPTR_008G127700	PILS2	9.67127	9.65627	9.73793	22.7142	27.696	24.0264	1.02925e-59	1.40497	up	--	--	Cellular Component: integral component of membrane (GO:0016021);; Biological Process: transmembrane transport (GO:0055085);;	K24139|2.7e-247|pop:7488388|K24139 auxin efflux carrier family protein | (RefSeq) protein PIN-LIKES 2	--	[S]	Function unknown	Membrane transport protein	Protein PIN-LIKES 2 OS=Arabidopsis thaliana OX=3702 GN=PILS2 PE=2 SV=1	G	Carbohydrate transport and metabolism	protein PIN-LIKES 2 [Populus trichocarpa]
gene-POPTR_019G032700	MYR2	1.94183	2.11078	2.48858	8.2717	7.87463	7.77223	8.91957e-57	1.91041	up	--	--	Molecular Function: DNA binding (GO:0003677);; Cellular Component: nucleus (GO:0005634);;	K12580|4.5e-34|aly:110227739|K12580 CCR4-NOT transcription complex subunit 3 | (RefSeq) myb-related protein 1-like isoform X1	RNA degradation (ko03018)	--	--	MYB-CC type transfactor, LHEQLE motif	Myb-related protein 2 OS=Arabidopsis thaliana OX=3702 GN=MYR2 PE=1 SV=1	K	Transcription	myb-related protein 2 isoform X1 [Populus trichocarpa]
gene-POPTR_012G001700	--	0.367788	0.41009	0.3949	1.65575	1.40948	1.47693	2.25902e-11	1.91352	up	--	--	--	K01513|3.7e-41|ats:109769794|K01513 ectonucleotide pyrophosphatase/phosphodiesterase family member 1/3 [EC:3.1.4.1 3.6.1.9] | (RefSeq) uncharacterized protein LOC109769794	Purine metabolism (ko00230);; Pyrimidine metabolism (ko00240);; Starch and sucrose metabolism (ko00500);; Riboflavin metabolism (ko00740);; Nicotinate and nicotinamide metabolism (ko00760);; Pantothenate and CoA biosynthesis (ko00770)	--	--	Plant protein 1589 of unknown function (A_thal_3526)	--	S	Function unknown	uncharacterized protein LOC7493181 isoform X1 [Populus trichocarpa]
gene-POPTR_010G135700	--	0.655247	0.609138	0.592952	1.57334	1.90534	1.80466	6.65976e-12	1.5215	up	--	--	Cellular Component: integral component of membrane (GO:0016021);;	--	--	--	--	--	--	--	--	hypothetical protein POPTR_010G135700 [Populus trichocarpa]
gene-POPTR_012G005600	RLP54	0.100192	0.135891	0.133405	0.419259	0.422112	0.414268	1.10848e-05	1.67685	up	--	--	Cellular Component: integral component of membrane (GO:0016021);;	K03131|1.0e-13|ghi:107956070|K03131 transcription initiation factor TFIID subunit 6 | (RefSeq) transcription initiation factor TFIID subunit 6b-like	Basal transcription factors (ko03022)	[R]	General function prediction only	Leucine rich repeat	Receptor-like protein 54 OS=Arabidopsis thaliana OX=3702 GN=RLP54 PE=3 SV=1	S	Function unknown	hypothetical protein POPTR_012G005600 [Populus trichocarpa]
gene-POPTR_011G165300	--	2.07368	1.93015	2.4942	7.40031	8.04973	8.07257	8.60823e-37	1.89091	up	--	--	Cellular Component: integral component of membrane (GO:0016021);;	--	--	--	--	--	--	--	--	uncharacterized protein LOC18103534 [Populus trichocarpa]
gene-POPTR_004G036350	--	0.37743	0.320054	0.16924	1.12727	1.1963	0.940334	4.24492e-07	1.82761	up	--	--	--	--	--	--	--	--	--	--	--	hypothetical protein POPTR_004G036350 [Populus trichocarpa]
gene-POPTR_019G120700	MIK2	0.265205	0.212851	0.314276	0.884634	1.11462	1.04199	3.99041e-17	1.94658	up	[T]	Signal transduction mechanisms	Molecular Function: protein kinase activity (GO:0004672);; Molecular Function: ATP binding (GO:0005524);; Cellular Component: integral component of membrane (GO:0016021);;	K13415|3.2e-91|han:110929858|K13415 protein brassinosteroid insensitive 1 [EC:2.7.10.1 2.7.11.1] | (RefSeq) systemin receptor SR160-like	Plant hormone signal transduction (ko04075)	--	--	Leucine rich repeat	MDIS1-interacting receptor like kinase 2 OS=Arabidopsis thaliana OX=3702 GN=MIK2 PE=1 SV=3	T	Signal transduction mechanisms	probable leucine-rich repeat receptor-like protein kinase At1g35710 [Populus trichocarpa]
gene-POPTR_012G005100	At1g18000	1.56682	1.8152	1.20148	3.34664	3.63531	4.24571	3.75282e-13	1.3254	up	--	--	Cellular Component: integral component of membrane (GO:0016021);;	--	--	[S]	Function unknown	Ion channel regulatory protein UNC-93	UNC93-like protein 1 OS=Arabidopsis thaliana OX=3702 GN=At1g18000 PE=2 SV=2	S	Function unknown	UNC93-like protein 1 [Populus trichocarpa]
gene-POPTR_012G020600	RLP6	1.73399	1.51874	1.78853	4.41421	5.27865	4.8058	8.96721e-36	1.56514	up	--	--	Cellular Component: integral component of membrane (GO:0016021);;	K13466|1.1e-20|tcc:18605675|K13466 EIX receptor 1/2 | (RefSeq) probable LRR receptor-like serine/threonine-protein kinase At4g36180	Plant-pathogen interaction (ko04626)	[R]	General function prediction only	Leucine rich repeat	Receptor-like protein 6 OS=Arabidopsis thaliana OX=3702 GN=RLP6 PE=3 SV=1	S	Function unknown	hypothetical protein POPTR_012G020600 [Populus trichocarpa]
gene-POPTR_T001933	N	2.06379	1.89639	2.30619	3.76475	4.55848	4.31307	2.64467e-21	1.05978	up	[R]	General function prediction only	Biological Process: signal transduction (GO:0007165);; Molecular Function: ADP binding (GO:0043531);;	K00695|3.8e-115|mtr:MTR_6g478030|K00695 sucrose synthase [EC:2.4.1.13] | (RefSeq) sucrose synthase	Starch and sucrose metabolism (ko00500)	--	--	TIR domain	TMV resistance protein N OS=Nicotiana glutinosa OX=35889 GN=N PE=1 SV=1	T	Signal transduction mechanisms	TMV resistance protein N isoform X2 [Populus trichocarpa]
gene-POPTR_009G163700	At2g27500	0.089916	0.086322	0.043107	1.38404	1.28791	1.42104	3.19694e-49	4.07295	up	--	--	Molecular Function: hydrolase activity, hydrolyzing O-glycosyl compounds (GO:0004553);; Biological Process: carbohydrate metabolic process (GO:0005975);; Cellular Component: anchored component of plasma membrane (GO:0046658);;	K19891|4.6e-70|ath:AT2G01630|K19891 glucan endo-1,3-beta-glucosidase 1/2/3 [EC:3.2.1.39] | (RefSeq) O-Glycosyl hydrolases family 17 protein	Starch and sucrose metabolism (ko00500)	--	--	Glycosyl hydrolases family 17	Glucan endo-1,3-beta-glucosidase 14 OS=Arabidopsis thaliana OX=3702 GN=At2g27500 PE=2 SV=2	G	Carbohydrate transport and metabolism	glucan endo-1,3-beta-glucosidase 14 [Populus trichocarpa]
gene-POPTR_009G143700	WIP3	1.6634	1.85682	1.79185	13.5551	13.9534	13.7488	5.84527e-152	2.99334	up	--	--	Cellular Component: nucleus (GO:0005634);; Biological Process: regulation of gene expression (GO:0010468);; Biological Process: anatomical structure development (GO:0048856);;	--	--	[R]	General function prediction only	Zinc finger, C2H2 type	Zinc finger protein WIP3 OS=Arabidopsis thaliana OX=3702 GN=WIP3 PE=2 SV=1	S	Function unknown	zinc finger protein WIP3 [Populus trichocarpa]
gene-POPTR_017G049800	ATL54	0.538992	0.314408	0.582469	1.92388	1.29396	0.888267	8.06977e-06	1.49476	up	--	--	Cellular Component: integral component of membrane (GO:0016021);; Biological Process: protein ubiquitination (GO:0016567);;	K10664|6.0e-49|vvi:100854068|K10664 E3 ubiquitin-protein ligase ATL6/9/15/31/42/55 [EC:2.3.2.27] | (RefSeq) RING-H2 finger protein ATL54	--	[O]	Posttranslational modification, protein turnover, chaperones	Ring finger domain	RING-H2 finger protein ATL54 OS=Arabidopsis thaliana OX=3702 GN=ATL54 PE=2 SV=2	O	Posttranslational modification, protein turnover, chaperones	RING-H2 finger protein ATL54 [Populus trichocarpa]
gene-POPTR_006G113700	--	4.864	3.51743	3.89296	8.94084	8.17814	9.26673	2.36275e-15	1.14554	up	--	--	--	--	--	--	--	--	--	--	--	uncharacterized protein LOC18100045 isoform X1 [Populus trichocarpa]
Populus_trichocarpa_newGene_936	PMA4	53.731	56.6565	63.2336	159.892	160.057	166.684	2.72422e-170	1.53938	up	[P]	Inorganic ion transport and metabolism	Molecular Function: ATP binding (GO:0005524);; Cellular Component: plasma membrane (GO:0005886);; Molecular Function: hydrogen-exporting ATPase activity, phosphorylative mechanism (GO:0008553);; Cellular Component: integral component of membrane (GO:0016021);; Biological Process: hydrogen ion export across plasma membrane (GO:0120029);;	K01535|0.0e+00|pop:7458740|K01535 H+-transporting ATPase [EC:7.1.2.1] | (RefSeq) plasma membrane ATPase 4	Oxidative phosphorylation (ko00190)	[P]	Inorganic ion transport and metabolism	E1-E2 ATPase	Plasma membrane ATPase 4 OS=Nicotiana plumbaginifolia OX=4092 GN=PMA4 PE=2 SV=1	P	Inorganic ion transport and metabolism	plasma membrane ATPase 4 [Populus trichocarpa]
gene-POPTR_011G130500	OCT4	9.1593	5.90136	5.93862	13.0382	14.3529	13.7192	1.52814e-05	1.00007	up	[G]	Carbohydrate transport and metabolism	Cellular Component: integral component of membrane (GO:0016021);; Molecular Function: transmembrane transporter activity (GO:0022857);;	K08202|1.9e-307|pop:112325921|K08202 MFS transporter, OCT family, solute carrier family 22 (organic cation transporter), member 4/5 | (RefSeq) organic cation/carnitine transporter 4-like	--	[R]	General function prediction only	Sugar (and other) transporter	Organic cation/carnitine transporter 4 OS=Arabidopsis thaliana OX=3702 GN=OCT4 PE=2 SV=1	S	Function unknown	hypothetical protein POPTR_011G130500 [Populus trichocarpa]
gene-POPTR_T101200	BMY1	276.311	243.48	257.655	814.37	759.059	835.359	4.56256e-192	1.68284	up	[G]	Carbohydrate transport and metabolism	Biological Process: polysaccharide catabolic process (GO:0000272);; Molecular Function: beta-amylase activity (GO:0016161);; Molecular Function: amylopectin maltohydrolase activity (GO:0102229);;	K01177|1.2e-87|pop:18107014|K01177 beta-amylase [EC:3.2.1.2] | (RefSeq) beta-amylase	Starch and sucrose metabolism (ko00500)	--	--	Glycosyl hydrolase family 14	Beta-amylase OS=Vigna unguiculata OX=3917 GN=BMY1 PE=2 SV=1	G	Carbohydrate transport and metabolism	hypothetical protein POPTR_T101200 [Populus trichocarpa]
gene-POPTR_004G198000	--	3.85102	3.13356	3.23582	9.23064	11.0129	9.12825	1.08473e-24	1.55521	up	--	--	Molecular Function: protein binding (GO:0005515);;	--	--	--	--	Leucine rich repeat	--	S	Function unknown	hypothetical protein POPTR_004G198000 [Populus trichocarpa]
gene-POPTR_002G157000	SDR1	13.0714	12.6285	11.9283	39.7199	37.571	34.596	1.21721e-100	1.62016	up	[IQR]	Lipid transport and metabolism;; Secondary metabolites biosynthesis, transport and catabolism;; General function prediction only	--	K15095|2.0e-166|pop:7494064|K15095 (+)-neomenthol dehydrogenase [EC:1.1.1.208] | (RefSeq) (+)-neomenthol dehydrogenase	--	[Q]	Secondary metabolites biosynthesis, transport and catabolism	short chain dehydrogenase	(+)-neomenthol dehydrogenase OS=Arabidopsis thaliana OX=3702 GN=SDR1 PE=1 SV=1	Q	Secondary metabolites biosynthesis, transport and catabolism	(+)-neomenthol dehydrogenase [Populus trichocarpa]
gene-POPTR_009G065100	CYP705A22	1.08863	0.796376	1.23334	3.97152	3.35664	4.1335	2.11123e-21	1.90217	up	[QV]	Secondary metabolites biosynthesis, transport and catabolism;; Defense mechanisms	Molecular Function: iron ion binding (GO:0005506);; Cellular Component: membrane (GO:0016020);; Cellular Component: integral component of membrane (GO:0016021);; Molecular Function: oxidoreductase activity, acting on paired donors, with incorporation or reduction of molecular oxygen, NAD(P)H as one donor, and incorporation of one atom of oxygen (GO:0016709);; Molecular Function: heme binding (GO:…	K23814|1.3e-144|hbr:110647247|K23814 cytochrome P450 family 705 subfamily A [EC:1.14.-.-] | (RefSeq) cytochrome P450 705A22-like	--	[Q]	Secondary metabolites biosynthesis, transport and catabolism	Cytochrome P450	Cytochrome P450 705A22 OS=Arabidopsis thaliana OX=3702 GN=CYP705A22 PE=2 SV=1	Q	Secondary metabolites biosynthesis, transport and catabolism	hypothetical protein POPTR_009G065100 [Populus trichocarpa]
gene-POPTR_018G096100	At5g57670	0.762267	0.690825	0.669035	6.00586	6.70801	6.04266	9.50998e-97	3.16079	up	[O]	Posttranslational modification, protein turnover, chaperones	Molecular Function: transmembrane receptor protein serine/threonine kinase activity (GO:0004675);; Molecular Function: ATP binding (GO:0005524);; Cellular Component: plasma membrane (GO:0005886);; Biological Process: protein phosphorylation (GO:0006468);;	K01534|4.2e-102|var:108330779|K01534 Zn2+/Cd2+-exporting ATPase [EC:7.2.2.12 7.2.2.21] | (RefSeq) cadmium/zinc-transporting ATPase HMA3-like	--	[T]	Signal transduction mechanisms	Protein tyrosine and serine/threonine kinase	Probable receptor-like serine/threonine-protein kinase At5g57670 OS=Arabidopsis thaliana OX=3702 GN=At5g57670 PE=2 SV=1	T	Signal transduction mechanisms	probable receptor-like serine/threonine-protein kinase At5g57670 [Populus trichocarpa]
gene-POPTR_001G032900	Os01g0270100	24.9298	22.6605	23.8861	47.6139	47.925	47.8453	1.08863e-48	1.05498	up	--	--	Molecular Function: cysteine-type endopeptidase inhibitor activity (GO:0004869);;	K13899|4.8e-10|cmax:111498186|K13899 cystatin-C | (RefSeq) cysteine proteinase inhibitor B-like	--	--	--	Aspartic acid proteinase inhibitor	Cysteine proteinase inhibitor 12 OS=Oryza sativa subsp. japonica OX=39947 GN=Os01g0270100 PE=2 SV=1	T	Signal transduction mechanisms	cysteine proteinase inhibitor 12 [Populus trichocarpa]
gene-POPTR_002G142600	--	0.550725	0.892672	0.854428	2.44351	2.46202	1.96166	1.96377e-07	1.56223	up	--	--	--	--	--	--	--	--	--	S	Function unknown	uncharacterized protein LOC7453943 [Populus trichocarpa]
gene-POPTR_019G076300	GXM3	10.4805	10.6775	9.17077	23.0649	24.1245	22.4648	9.5248e-46	1.24726	up	[R]	General function prediction only	Cellular Component: Golgi apparatus (GO:0005794);; Biological Process: plant-type secondary cell wall biogenesis (GO:0009834);; Molecular Function: glucuronoxylan 4-O-methyltransferase activity (GO:0030775);; Biological Process: methylation (GO:0032259);; Biological Process: xylan metabolic process (GO:0045491);; Biological Process: xylan biosynthetic process (GO:0045492);;	K18801|1.6e-174|pop:7455267|K18801 glucuronoxylan 4-O-methyltransferase [EC:2.1.1.112] | (RefSeq) glucuronoxylan 4-O-methyltransferase 3	--	--	--	Polysaccharide biosynthesis	Glucuronoxylan 4-O-methyltransferase 3 OS=Arabidopsis thaliana OX=3702 GN=GXM3 PE=1 SV=1	S	Function unknown	glucuronoxylan 4-O-methyltransferase 3 [Populus trichocarpa]
gene-POPTR_008G003400	--	0.100323	0.180558	0.440104	1.32527	0.930739	1.14888	3.27065e-08	2.1583	up	[O]	Posttranslational modification, protein turnover, chaperones	Molecular Function: peptidase activity (GO:0008233);; Cellular Component: integral component of membrane (GO:0016021);;	K01369|1.6e-293|pop:7490837|K01369 legumain [EC:3.4.22.34] | (RefSeq) vacuolar-processing enzyme alpha-isozyme	--	[O]	Posttranslational modification, protein turnover, chaperones	Peptidase C13 family	Vacuolar-processing enzyme OS=Citrus sinensis OX=2711 PE=2 SV=1	O	Posttranslational modification, protein turnover, chaperones	hypothetical protein POPTR_008G003400 [Populus trichocarpa]
gene-POPTR_006G092400	--	5.28681	5.51711	4.70226	17.2291	17.2565	17.0883	7.42927e-109	1.77759	up	--	--	--	--	--	--	--	--	--	S	Function unknown	hypothetical protein POPTR_006G092400 [Populus trichocarpa]
gene-POPTR_019G053300	RIC4	1.36117	1.25363	1.15569	6.8044	6.47716	6.12144	8.00528e-36	2.36888	up	--	--	Biological Process: reproduction (GO:0000003);; Biological Process: cell morphogenesis (GO:0000902);; Biological Process: cell morphogenesis involved in differentiation (GO:0000904);; Biological Process: developmental process involved in reproduction (GO:0003006);; Cellular Component: cellular_component (GO:0005575);; Cellular Component: cell (GO:0005623);; Cellular Component: plasma membrane (GO…	K23541|9.3e-31|egu:105051209|K23541 Ca2+/H+ antiporter, TMEM165/GDT1 family | (RefSeq) LOW QUALITY PROTEIN: uncharacterized protein LOC105051209	--	--	--	P21-Rho-binding domain	CRIB domain-containing protein RIC4 OS=Arabidopsis thaliana OX=3702 GN=RIC4 PE=1 SV=1	S	Function unknown	CRIB domain-containing protein RIC4 [Populus trichocarpa]
Populus_trichocarpa_newGene_468	SULTR3;3	7.47322	4.99115	7.17384	15.726	11.7792	14.1039	3.05792e-10	1.11966	up	--	--	Molecular Function: secondary active sulfate transmembrane transporter activity (GO:0008271);; Cellular Component: integral component of membrane (GO:0016021);;	K17471|6.5e-63|pop:7459780|K17471 sulfate transporter 3 | (RefSeq) LOW QUALITY PROTEIN: probable sulfate transporter 3.3	--	[P]	Inorganic ion transport and metabolism	Sulfate permease family	Probable sulfate transporter 3.3 OS=Arabidopsis thaliana OX=3702 GN=SULTR3;3 PE=2 SV=2	P	Inorganic ion transport and metabolism	LOW QUALITY PROTEIN: probable sulfate transporter 3.3 [Populus trichocarpa]
gene-POPTR_002G196000	GEP	12.4327	12.8914	14.2462	25.1996	27.4354	24.4127	2.62161e-57	1.01597	up	[E]	Amino acid transport and metabolism	Molecular Function: serine-type endopeptidase activity (GO:0004252);;	--	--	[O]	Posttranslational modification, protein turnover, chaperones	Prolyl oligopeptidase family	Probable glutamyl endopeptidase, chloroplastic OS=Arabidopsis thaliana OX=3702 GN=GEP PE=2 SV=2	O	Posttranslational modification, protein turnover, chaperones	probable glutamyl endopeptidase, chloroplastic [Populus trichocarpa]
gene-POPTR_001G141600	--	4.30341	4.417	4.40584	9.09543	9.50355	10.2756	7.54071e-19	1.18121	up	--	--	--	--	--	--	--	--	--	--	--	uncharacterized protein LOC18094160 [Populus trichocarpa]
gene-POPTR_011G169700	At5g56260	2.21808	1.33664	1.36654	3.74611	4.23529	4.39866	2.52522e-10	1.31164	up	[J]	Translation, ribosomal structure and biogenesis	Molecular Function: ribonuclease inhibitor activity (GO:0008428);; Molecular Function: oxaloacetate decarboxylase activity (GO:0008948);; Molecular Function: metal ion binding (GO:0046872);; Molecular Function: 4-hydroxy-4-methyl-2-oxoglutarate aldolase activity (GO:0047443);; Biological Process: regulation of RNA metabolic process (GO:0051252);;	K02553|2.9e-53|rcu:107262668|K02553 regulator of ribonuclease activity A | (RefSeq) uncharacterized protein LOC107262668	--	--	--	Aldolase/RraA	Putative 4-hydroxy-4-methyl-2-oxoglutarate aldolase 3 OS=Arabidopsis thaliana OX=3702 GN=At5g56260 PE=1 SV=1	E	Amino acid transport and metabolism	putative 4-hydroxy-4-methyl-2-oxoglutarate aldolase 3 [Populus trichocarpa]
gene-POPTR_T030901	--	3.98943	4.30309	4.29688	15.8587	15.2353	19.6237	1.72213e-11	1.98135	up	--	--	--	--	--	--	--	--	--	--	--	hypothetical protein POPTR_T029480 [Populus trichocarpa]
gene-POPTR_010G244200	--	2.93417	2.22827	2.68848	5.95044	5.67454	5.49373	2.89496e-15	1.16725	up	[K]	Transcription	--	--	--	--	--	NLI interacting factor-like phosphatase	--	S	Function unknown	uncharacterized protein LOC18102787 [Populus trichocarpa]
gene-POPTR_013G001600	RCI2A	14.9449	14.5	11.5267	30.0062	29.1095	40.8466	6.58141e-10	1.31609	up	[S]	Function unknown	Cellular Component: integral component of membrane (GO:0016021);;	K03260|1.0e-07|pda:103710480|K03260 translation initiation factor 4G | (RefSeq) eukaryotic translation initiation factor-like	RNA transport (ko03013)	[R]	General function prediction only	Proteolipid membrane potential modulator	Hydrophobic protein RCI2A OS=Arabidopsis thaliana OX=3702 GN=RCI2A PE=2 SV=1	S	Function unknown	hydrophobic protein RCI2A [Populus trichocarpa]
gene-POPTR_014G133900	GRXS6	0.75339	0.958699	1.07696	5.50913	4.54622	3.80327	1.15248e-13	2.24886	up	--	--	Molecular Function: arsenate reductase (glutaredoxin) activity (GO:0008794);; Molecular Function: electron carrier activity (GO:0009055);; Molecular Function: protein disulfide oxidoreductase activity (GO:0015035);;	K03676|3.2e-50|pop:7457963|K03676 glutaredoxin 3 | (RefSeq) monothiol glutaredoxin-S6	--	[O]	Posttranslational modification, protein turnover, chaperones	Glutaredoxin	Monothiol glutaredoxin-S6 OS=Arabidopsis thaliana OX=3702 GN=GRXS6 PE=3 SV=1	O	Posttranslational modification, protein turnover, chaperones	monothiol glutaredoxin-S6 [Populus trichocarpa]
gene-POPTR_005G026200	RBOHB	0.759915	0.597751	0.865443	1.70596	2.26622	2.16405	1.39193e-16	1.49783	up	[T]	Signal transduction mechanisms	Molecular Function: peroxidase activity (GO:0004601);; Molecular Function: calcium ion binding (GO:0005509);; Cellular Component: plasma membrane (GO:0005886);; Cellular Component: integral component of membrane (GO:0016021);; Molecular Function: NAD(P)H oxidase activity (GO:0016174);; Biological Process: oxidation-reduction process (GO:0055114);;	K13447|0.0e+00|pop:18098678|K13447 respiratory burst oxidase [EC:1.6.3.- 1.11.1.-] | (RefSeq) respiratory burst oxidase homolog protein B	MAPK signaling pathway - plant (ko04016);; Plant-pathogen interaction (ko04626)	[PQ]	Inorganic ion transport and metabolism;; Secondary metabolites biosynthesis, transport and catabolism	Ferric reductase NAD binding domain	Respiratory burst oxidase homolog protein B OS=Solanum tuberosum OX=4113 GN=RBOHB PE=1 SV=1	--	--	respiratory burst oxidase homolog protein B [Populus trichocarpa]
gene-POPTR_012G037400	OCT1	0.144175	0.219462	0.224432	13.7793	12.6248	10.7344	6.46729e-163	5.90211	up	[G]	Carbohydrate transport and metabolism	Cellular Component: integral component of membrane (GO:0016021);; Molecular Function: transmembrane transporter activity (GO:0022857);;	K08202|2.1e-92|psom:113317381|K08202 MFS transporter, OCT family, solute carrier family 22 (organic cation transporter), member 4/5 | (RefSeq) organic cation/carnitine transporter 4-like	--	[R]	General function prediction only	Sugar (and other) transporter	Organic cation/carnitine transporter 1 OS=Arabidopsis thaliana OX=3702 GN=OCT1 PE=2 SV=1	S	Function unknown	organic cation/carnitine transporter 1 [Populus trichocarpa]
Populus_trichocarpa_newGene_455	IRE	4.0637	4.05314	4.62028	10.0587	9.28189	7.71848	1.68265e-15	1.13141	up	--	--	Molecular Function: protein serine/threonine kinase activity (GO:0004674);; Molecular Function: ATP binding (GO:0005524);;	K08790|7.1e-116|pop:7475393|K08790 serine/threonine kinase 38 [EC:2.7.11.1] | (RefSeq) serine/threonine-protein kinase tricorner	--	[R]	General function prediction only	Protein kinase domain	Probable serine/threonine protein kinase IRE OS=Arabidopsis thaliana OX=3702 GN=IRE PE=2 SV=1	T	Signal transduction mechanisms	serine/threonine-protein kinase tricorner [Populus trichocarpa]
gene-POPTR_006G090100	--	0.447886	0.572479	0.489914	2.56592	2.09043	2.87765	2.97948e-14	2.26519	up	--	--	--	--	--	--	--	--	--	--	--	hypothetical protein POPTR_006G090100 [Populus trichocarpa]
gene-POPTR_004G068800	--	11.3534	10.7279	4.40447	23.0674	38.8562	48.6178	6.87587e-05	1.91596	up	--	--	--	--	--	--	--	--	--	--	--	hypothetical protein POPTR_004G068800 [Populus trichocarpa]
gene-POPTR_006G014400	RPP13L4	16.4299	16.324	18.1978	37.1478	35.6889	35.428	4.64219e-87	1.14001	up	[R]	General function prediction only	Molecular Function: ADP binding (GO:0043531);;	K13457|3.9e-69|nnu:104607772|K13457 disease resistance protein RPM1 | (RefSeq) disease resistance protein RPM1-like	Plant-pathogen interaction (ko04626)	[T]	Signal transduction mechanisms	NB-ARC domain	Disease resistance RPP13-like protein 4 OS=Arabidopsis thaliana OX=3702 GN=RPP13L4 PE=1 SV=2	T	Signal transduction mechanisms	disease resistance RPP13-like protein 4 [Populus trichocarpa]
gene-POPTR_T032684	RFK1	0.183926	0.208668	0.165863	0.68119	0.643774	0.733194	1.24262e-09	1.78541	up	--		Molecular Function: protein kinase activity (GO:0004672);; Molecular Function: ATP binding (GO:0005524);; Cellular Component: integral component of membrane (GO:0016021);;	K13418|1.0e-71|cmax:111479323|K13418 somatic embryogenesis receptor kinase 1 [EC:2.7.10.1 2.7.11.1] | (RefSeq) somatic embryogenesis receptor kinase 2-like	--	--	--	Protein tyrosine and serine/threonine kinase	Probable LRR receptor-like serine/threonine-protein kinase At1g29720 OS=Arabidopsis thaliana OX=3702 GN=RFK1 PE=2 SV=3	--	--	hypothetical protein POPTR_T032684 [Populus trichocarpa]
gene-POPTR_001G213700	AGO5	1.72976	1.6728	1.97326	3.84217	3.52799	3.12432	1.37412e-16	1.01526	up	--	--	Molecular Function: nucleic acid binding (GO:0003676);; Biological Process: gene silencing by RNA (GO:0031047);;	K11593|0.0e+00|pop:7472995|K11593 eukaryotic translation initiation factor 2C | (RefSeq) protein argonaute 5 isoform X1	--	[J]	Translation, ribosomal structure and biogenesis	Piwi domain	Protein argonaute 5 OS=Arabidopsis thaliana OX=3702 GN=AGO5 PE=1 SV=2	J	Translation, ribosomal structure and biogenesis	protein argonaute 5 isoform X1 [Populus trichocarpa]
gene-POPTR_011G132600	GAUT12	0.157875	0.139736	0.227651	1.21092	2.04654	1.45634	3.53154e-23	3.07346	up	--	--	Cellular Component: Golgi membrane (GO:0000139);; Cellular Component: integral component of membrane (GO:0016021);; Biological Process: pectin biosynthetic process (GO:0045489);; Molecular Function: polygalacturonate 4-alpha-galacturonosyltransferase activity (GO:0047262);; Biological Process: cell wall organization (GO:0071555);;	K20867|0.0e+00|pop:7470925|K20867 galacturonosyltransferase 12/13/14/15 [EC:2.4.1.-] | (RefSeq) probable galacturonosyltransferase 12	--	--	--	Glycosyl transferase family 8	Probable galacturonosyltransferase 12 OS=Arabidopsis thaliana OX=3702 GN=GAUT12 PE=2 SV=1	G	Carbohydrate transport and metabolism	probable galacturonosyltransferase 12 [Populus trichocarpa]
gene-POPTR_005G015300	--	1.94898	2.24875	2.38195	4.8057	6.14969	6.18987	1.23295e-16	1.41891	up	--	--	--	--	--	--	--	--	--	--	--	hypothetical protein POPTR_005G015300 [Populus trichocarpa]
gene-POPTR_T002300	RUN1	0.792539	1.07106	0.986703	2.02199	2.08735	1.85483	1.52772e-11	1.10795	up	[K]	Transcription	Molecular Function: ADP binding (GO:0043531);;	K00695|5.4e-75|mtr:MTR_6g478030|K00695 sucrose synthase [EC:2.4.1.13] | (RefSeq) sucrose synthase	Starch and sucrose metabolism (ko00500)	--	--	NB-ARC domain	Disease resistance protein RUN1 OS=Vitis rotundifolia OX=103349 GN=RUN1 PE=1 SV=1	T	Signal transduction mechanisms	hypothetical protein POPTR_T002300 [Populus trichocarpa]
gene-POPTR_008G083100	ZIP1	1.23541	1.47762	1.47992	4.7706	4.45291	4.32386	6.50785e-22	1.71786	up	[P]	Inorganic ion transport and metabolism	Molecular Function: zinc ion transmembrane transporter activity (GO:0005385);; Cellular Component: plasma membrane (GO:0005886);; Cellular Component: membrane (GO:0016020);; Cellular Component: integral component of membrane (GO:0016021);; Biological Process: zinc II ion transmembrane transport (GO:0071577);;	K14709|1.7e-191|pop:7460672|K14709 solute carrier family 39 (zinc transporter), member 1/2/3 | (RefSeq) zinc transporter 1	--	[P]	Inorganic ion transport and metabolism	ZIP Zinc transporter	Zinc transporter 1 OS=Arabidopsis thaliana OX=3702 GN=ZIP1 PE=2 SV=1	P	Inorganic ion transport and metabolism	zinc transporter 1 [Populus trichocarpa]
gene-POPTR_006G256600	PECS-1.1	0.813362	1.0909	0.619611	3.79081	3.95697	4.17363	1.33803e-30	2.24558	up	[GI]	Carbohydrate transport and metabolism;; Lipid transport and metabolism	Cellular Component: extracellular region (GO:0005576);; Cellular Component: cell wall (GO:0005618);; Molecular Function: pectinesterase activity (GO:0030599);; Biological Process: cell wall modification (GO:0042545);; Molecular Function: aspartyl esterase activity (GO:0045330);; Biological Process: pectin catabolic process (GO:0045490);; Molecular Function: pectinesterase inhibitor activity (GO:0…	K01051|2.6e-308|pop:18109254|K01051 pectinesterase [EC:3.1.1.11] | (RefSeq) pectinesterase	Pentose and glucuronate interconversions (ko00040)	--	--	Pectinesterase	Pectinesterase 1 OS=Citrus sinensis OX=2711 GN=PECS-1.1 PE=2 SV=1	G	Carbohydrate transport and metabolism	pectinesterase [Populus trichocarpa]
gene-POPTR_006G243700	BURP3	0.51607	0.461058	0.610692	4.30234	5.09194	3.99251	2.74269e-65	3.08301	up	--	--	Cellular Component: cellular_component (GO:0005575);; Cellular Component: intracellular (GO:0005622);; Cellular Component: cell (GO:0005623);; Cellular Component: cytoplasm (GO:0005737);; Cellular Component: endosome (GO:0005768);; Cellular Component: Golgi apparatus (GO:0005794);; Cellular Component: trans-Golgi network (GO:0005802);; Biological Process: response to stress (GO:0006950);; Biologi…	K12472|6.7e-34|cqi:110701739|K12472 epidermal growth factor receptor substrate 15 | (RefSeq) GATA zinc finger domain-containing protein 14-like	Endocytosis (ko04144)	--	--	BURP domain	BURP domain-containing protein 3 OS=Oryza sativa subsp. japonica OX=39947 GN=BURP3 PE=2 SV=1	S	Function unknown	BURP domain protein RD22 [Populus trichocarpa]
gene-POPTR_010G049600	RGLG2	3.3866	2.73781	3.2485	6.07421	6.46316	6.16394	2.28167e-20	1.045	up	--	--	Molecular Function: molecular_function (GO:0003674);; Molecular Function: catalytic activity (GO:0003824);; Molecular Function: ubiquitin-protein transferase activity (GO:0004842);; Cellular Component: cellular_component (GO:0005575);; Cellular Component: intracellular (GO:0005622);; Cellular Component: cell (GO:0005623);; Cellular Component: nucleus (GO:0005634);; Cellular Component: plasma memb…	K16280|1.2e-261|pop:7460737|K16280 E3 ubiquitin-protein ligase RGLG [EC:2.3.2.27] | (RefSeq) E3 ubiquitin-protein ligase RGLG2	--	[T]	Signal transduction mechanisms	Copine	E3 ubiquitin-protein ligase RGLG2 OS=Arabidopsis thaliana OX=3702 GN=RGLG2 PE=1 SV=1	O	Posttranslational modification, protein turnover, chaperones	E3 ubiquitin-protein ligase RGLG2 [Populus trichocarpa]
gene-POPTR_017G033932	At4g10780	0.532644	0.564239	0.35558	1.32212	0.827797	0.863376	0.00123062	1.05426	up	--	--	Molecular Function: protein binding (GO:0005515);; Cellular Component: cellular_component (GO:0005575);; Cellular Component: cell (GO:0005623);; Cellular Component: plasma membrane (GO:0005886);; Biological Process: response to stress (GO:0006950);; Biological Process: defense response (GO:0006952);; Biological Process: cell communication (GO:0007154);; Biological Process: signal transduction (GO…	K13459|1.2e-88|pop:18108031|K13459 disease resistance protein RPS2 | (RefSeq) LOW QUALITY PROTEIN: probable disease resistance protein At4g27220	Plant-pathogen interaction (ko04626)	[T]	Signal transduction mechanisms	Leucine rich repeat	Putative disease resistance protein At4g10780 OS=Arabidopsis thaliana OX=3702 GN=At4g10780 PE=3 SV=1	T	Signal transduction mechanisms	hypothetical protein POPTR_017G033932 [Populus trichocarpa]
gene-POPTR_001G205800	LNK1	11.3583	11.4911	11.5366	31.4699	29.5625	29.321	1.03357e-163	1.44476	up	--	--	Biological Process: regulation of transcription, DNA-templated (GO:0006355);; Biological Process: circadian rhythm (GO:0007623);;	--	--	--	--	--	Protein LNK1 OS=Arabidopsis thaliana OX=3702 GN=LNK1 PE=1 SV=1	S	Function unknown	protein LNK1 [Populus trichocarpa]
gene-POPTR_005G042300	--	4.77758	4.21968	4.231	11.3074	13.6232	14.2017	5.42373e-29	1.60308	up	--	--	--	K15042|2.4e-17|cit:102609277|K15042 importin subunit alpha-6/7 | (RefSeq) importin subunit alpha-1a-like	--	--	--	--	--	T	Signal transduction mechanisms	hypothetical protein POPTR_005G042300 [Populus trichocarpa]
gene-POPTR_004G024900	CRK25	0.064643	0.172523	0.066661	0.588228	0.683472	0.583943	9.68604e-08	2.36017	up	--	--	Molecular Function: ATP binding (GO:0005524);; Cellular Component: integral component of membrane (GO:0016021);;	--	--	--	--	Salt stress response/antifungal	Cysteine-rich receptor-like protein kinase 25 OS=Arabidopsis thaliana OX=3702 GN=CRK25 PE=3 SV=1	T	Signal transduction mechanisms	hypothetical protein POPTR_004G024900 [Populus trichocarpa]
gene-POPTR_001G428100	At4g27190	3.48122	3.66064	4.10107	7.87032	7.49037	7.71492	4.03284e-37	1.08818	up	[R]	General function prediction only	Molecular Function: ADP binding (GO:0043531);;	K13459|3.8e-142|mdm:103422584|K13459 disease resistance protein RPS2 | (RefSeq) LOW QUALITY PROTEIN: disease resistance protein At4g27190-like	Plant-pathogen interaction (ko04626)	[T]	Signal transduction mechanisms	NB-ARC domain	Disease resistance protein At4g27190 OS=Arabidopsis thaliana OX=3702 GN=At4g27190 PE=2 SV=1	T	Signal transduction mechanisms	probable disease resistance protein At4g27220 isoform X1 [Populus trichocarpa]
gene-POPTR_003G086900	SGPP	13.6772	12.4531	13.8649	29.7983	33.1395	32.7183	9.29886e-59	1.30755	up	[GR]	Carbohydrate transport and metabolism;; General function prediction only	Molecular Function: hydrolase activity (GO:0016787);;	K22912|7.7e-10|zma:100285779|K22912 5-amino-6-(5-phospho-D-ribitylamino)uracil phosphatase [EC:3.1.3.104] | (RefSeq) cl39673_1b; uncharacterized protein LOC100285779	Riboflavin metabolism (ko00740)	[R]	General function prediction only	Haloacid dehalogenase-like hydrolase	Haloacid dehalogenase-like hydrolase domain-containing protein Sgpp OS=Arabidopsis thaliana OX=3702 GN=SGPP PE=1 SV=2	S	Function unknown	haloacid dehalogenase-like hydrolase domain-containing protein Sgpp [Populus trichocarpa]
gene-POPTR_009G017900	ALMT2	0.028482	0	0.107052	0.912197	1.06305	0.657158	1.77336e-05	3.13874	up	--	--	Cellular Component: plant-type vacuole membrane (GO:0009705);; Biological Process: malate transport (GO:0015743);; Cellular Component: integral component of membrane (GO:0016021);;	K03695|8.1e-32|egr:104416563|K03695 ATP-dependent Clp protease ATP-binding subunit ClpB | (RefSeq) chaperone protein ClpB1-like	--	[R]	General function prediction only	Aluminium activated malate transporter	Aluminum-activated malate transporter 2 OS=Arabidopsis thaliana OX=3702 GN=ALMT2 PE=2 SV=2	S	Function unknown	aluminum-activated malate transporter 2 [Populus trichocarpa]
gene-POPTR_005G160800	--	0.681038	0.686255	0.94531	1.44002	1.75266	1.41805	0.000342822	1.00455	up	--	--	Molecular Function: SNARE binding (GO:0000149);; Molecular Function: 1-phosphatidylinositol binding (GO:0005545);; Molecular Function: phosphatidylinositol-4,5-bisphosphate binding (GO:0005546);; Cellular Component: plasma membrane (GO:0005886);; Cellular Component: clathrin-coated pit (GO:0005905);; Biological Process: endocytosis (GO:0006897);; Biological Process: vesicle budding from membrane …	K20043|9.3e-49|vra:106755789|K20043 clathrin coat assembly protein AP180 | (RefSeq) putative clathrin assembly protein At4g40080	--	--	--	ANTH domain	--	--	--	putative clathrin assembly protein At4g40080 [Populus trichocarpa]
gene-POPTR_013G133700	--	2.99768	3.45365	3.55885	9.4207	8.57067	8.92593	2.20182e-46	1.47432	up	--	--	Cellular Component: membrane (GO:0016020);; Cellular Component: integral component of membrane (GO:0016021);;	K00889|7.0e-45|dcr:108218789|K00889 1-phosphatidylinositol-4-phosphate 5-kinase [EC:2.7.1.68] | (RefSeq) phosphatidylinositol 4-phosphate 5-kinase 6-like	Inositol phosphate metabolism (ko00562);; Phosphatidylinositol signaling system (ko04070);; Endocytosis (ko04144)	[R]	General function prediction only	Ankyrin repeats (3 copies)	--	L	Replication, recombination and repair	hypothetical protein POPTR_013G133700 [Populus trichocarpa]
gene-POPTR_001G155700	ERF034	0.139543	0.279474	0.111373	1.37394	0.927396	0.904362	6.16636e-09	2.42212	up	--	--	Molecular Function: DNA binding (GO:0003677);; Molecular Function: transcription factor activity, sequence-specific DNA binding (GO:0003700);; Cellular Component: nucleus (GO:0005634);;	K09286|2.2e-36|cmo:103497991|K09286 EREBP-like factor | (RefSeq) dehydration-responsive element-binding protein 3-like	--	--	--	AP2 domain	Ethylene-responsive transcription factor ERF034 OS=Arabidopsis thaliana OX=3702 GN=ERF034 PE=2 SV=2	K	Transcription	ethylene-responsive transcription factor ERF039 [Populus trichocarpa]
gene-POPTR_012G006400	OMT1	45.1992	41.3089	50.3748	187.871	180.997	184.441	4.7979e-271	2.06693	up	[H]	Coenzyme transport and metabolism	Molecular Function: O-methyltransferase activity (GO:0008171);; Molecular Function: S-adenosylmethionine-dependent methyltransferase activity (GO:0008757);; Biological Process: aromatic compound biosynthetic process (GO:0019438);; Biological Process: methylation (GO:0032259);; Molecular Function: protein dimerization activity (GO:0046983);;	K13066|8.0e-213|pop:7493466|K13066 caffeic acid 3-O-methyltransferase [EC:2.1.1.68] | (RefSeq) caffeic acid 3-O-methyltransferase 1	Phenylpropanoid biosynthesis (ko00940)	[R]	General function prediction only	O-methyltransferase domain	Caffeic acid 3-O-methyltransferase 1 OS=Populus tremuloides OX=3693 GN=OMT1 PE=1 SV=1	S	Function unknown	caffeic acid 3-O-methyltransferase 1 [Populus trichocarpa]
gene-POPTR_013G043100	PSE1	0.276116	0.428324	0.444218	2.12652	2.6295	1.93416	2.67008e-22	2.51439	up	--	--	--	K03283|9.6e-16|cann:107854185|K03283 heat shock 70kDa protein 1/2/6/8 | (RefSeq) heat shock cognate 70 kDa protein 2-like	Spliceosome (ko03040);; Protein processing in endoplasmic reticulum (ko04141);; Endocytosis (ko04144)	--	--	Lecithin retinol acyltransferase	Protein LEAD-SENSITIVE 1 OS=Arabidopsis thaliana OX=3702 GN=PSE1 PE=2 SV=1	S	Function unknown	HRAS-like suppressor 3 isoform X1 [Populus trichocarpa]
gene-POPTR_010G005300	HIPP23	1.41839	1.40875	1.49132	5.52408	6.81502	6.62289	2.89308e-39	2.15698	up	--	--	Biological Process: metal ion transport (GO:0030001);; Molecular Function: metal ion binding (GO:0046872);;	K10752|2.2e-06|zju:107427343|K10752 histone-binding protein RBBP4 | (RefSeq) LOW QUALITY PROTEIN: WD-40 repeat-containing protein MSI3	--	[P]	Inorganic ion transport and metabolism	Heavy-metal-associated domain	Heavy metal-associated isoprenylated plant protein 23 OS=Arabidopsis thaliana OX=3702 GN=HIPP23 PE=1 SV=1	P	Inorganic ion transport and metabolism	heavy metal-associated isoprenylated plant protein 35 [Populus trichocarpa]
gene-POPTR_003G030300	--	13.74	14.265	12.0094	36.076	35.8047	34.4649	2.00195e-67	1.45775	up	--	--	Molecular Function: calcium ion binding (GO:0005509);;	K06268|3.5e-84|pop:18096686|K06268 serine/threonine-protein phosphatase 2B regulatory subunit | (RefSeq) calcineurin subunit B isoform X2	--	[T]	Signal transduction mechanisms	EF-hand domain pair	--	T	Signal transduction mechanisms	calcineurin subunit B isoform X1 [Populus trichocarpa]
gene-POPTR_001G164800	At1g54070	44.7758	41.1677	45.2141	96.4812	103.318	91.8915	3.27717e-92	1.20446	up	--	--	--	--	--	--	--	Dormancy/auxin associated protein	Dormancy-associated protein homolog 4 OS=Arabidopsis thaliana OX=3702 GN=At1g54070 PE=3 SV=1	S	Function unknown	dormancy-associated protein homolog 4 isoform X2 [Populus trichocarpa]
gene-POPTR_008G136800	HSFA8	3.28041	2.81501	3.32665	6.24737	6.65895	5.76188	3.90087e-23	1.03262	up	--	--	Molecular Function: RNA polymerase II core promoter proximal region sequence-specific DNA binding (GO:0000978);; Molecular Function: transcription factor activity, sequence-specific DNA binding (GO:0003700);; Cellular Component: nucleus (GO:0005634);; Biological Process: cellular response to heat (GO:0034605);; Cellular Component: host cell nucleus (GO:0042025);; Molecular Function: sequence-spec…	K09419|2.2e-224|pop:7457815|K09419 heat shock transcription factor, other eukaryote | (RefSeq) heat stress transcription factor A-8 isoform X1	--	[K]	Transcription	HSF-type DNA-binding	Heat stress transcription factor A-8 OS=Arabidopsis thaliana OX=3702 GN=HSFA8 PE=2 SV=1	K	Transcription	heat stress transcription factor A-8 isoform X1 [Populus trichocarpa]
gene-POPTR_011G151300	--	2.10677	2.45938	2.23534	7.51226	8.59006	8.04838	1.58352e-66	1.87106	up	[T]	Signal transduction mechanisms	Molecular Function: protein binding (GO:0005515);;	--	--	[R]	General function prediction only	Ankyrin repeats (3 copies)	--	S	Function unknown	ankyrin-3 [Populus trichocarpa]
gene-POPTR_001G328800	--	6.95081	7.5757	5.80581	42.789	36.8755	40.17	6.21627e-133	2.59727	up	--	--	Cellular Component: integral component of membrane (GO:0016021);;	K11094|1.3e-15|peq:110018477|K11094 U2 small nuclear ribonucleoprotein B'' | (RefSeq) U2 small nuclear ribonucleoprotein B''-like isoform X1	Spliceosome (ko03040)	--	--	Protein of unknown function (DUF3339)	--	--	--	hypothetical protein POPTR_001G328800 [Populus trichocarpa]
gene-POPTR_007G117200	UGT74F1	6.76762	5.5165	6.39941	12.7852	11.5047	12.5703	3.91566e-23	1.02891	up	[G]	Carbohydrate transport and metabolism	Molecular Function: UDP-glycosyltransferase activity (GO:0008194);; Cellular Component: intracellular membrane-bounded organelle (GO:0043231);; Molecular Function: quercetin 3-O-glucosyltransferase activity (GO:0080043);; Molecular Function: quercetin 7-O-glucosyltransferase activity (GO:0080044);;	K13691|1.5e-264|pop:7486060|K13691 pathogen-inducible salicylic acid glucosyltransferase [EC:2.4.1.-] | (RefSeq) UDP-glycosyltransferase 74F1	--	[GC]	Carbohydrate transport and metabolism;; Energy production and conversion	UDP-glucoronosyl and UDP-glucosyl transferase	Flavonol 7-O-beta-glucosyltransferase UGT74F1 OS=Arabidopsis thaliana OX=3702 GN=UGT74F1 PE=1 SV=1	--	--	UDP-glycosyltransferase 74F1 [Populus trichocarpa]
gene-POPTR_004G211300	REV	6.80062	6.05256	7.06789	13.0861	13.2125	12.6044	5.28691e-47	1.0172	up	--	--	Molecular Function: DNA binding (GO:0003677);; Cellular Component: nucleus (GO:0005634);; Molecular Function: lipid binding (GO:0008289);;	K09338|0.0e+00|pop:18098199|K09338 homeobox-leucine zipper protein | (RefSeq) homeobox-leucine zipper protein REVOLUTA	--	--	--	MEKHLA domain	Homeobox-leucine zipper protein REVOLUTA OS=Arabidopsis thaliana OX=3702 GN=REV PE=1 SV=2	K	Transcription	homeobox-leucine zipper protein REVOLUTA [Populus trichocarpa]
gene-POPTR_007G110600	PUB28	0.824812	0.941083	1.12403	4.84469	4.0174	4.83107	1.75207e-33	2.25706	up	--	--	Molecular Function: ubiquitin-protein transferase activity (GO:0004842);;	K10260|1.3e-12|ota:OT_ostta09g00430|K10260 F-box and WD-40 domain protein 7 | (RefSeq) WD40/YVTN repeat-like-containing domain	Ubiquitin mediated proteolysis (ko04120)	--	--	U-box domain	U-box domain-containing protein 28 OS=Arabidopsis thaliana OX=3702 GN=PUB28 PE=1 SV=1	H	Coenzyme transport and metabolism	U-box domain-containing protein 28 [Populus trichocarpa]
gene-POPTR_016G039100	--	2.05709	2.0707	1.84077	4.47527	4.44532	4.4344	1.46478e-16	1.19823	up	--	--	Cellular Component: integral component of membrane (GO:0016021);;	--	--	--	--	Plant protein of unknown function	--	S	Function unknown	uncharacterized protein LOC112323221 [Populus trichocarpa]
gene-POPTR_004G007600	--	51.8215	48.9694	52.9813	102.866	98.4055	100.51	5.59806e-99	1.03178	up	--	--	Molecular Function: aspartic-type endopeptidase activity (GO:0004190);; Biological Process: lipid metabolic process (GO:0006629);; Cellular Component: integral component of membrane (GO:0016021);;	K08245|1.1e-299|pop:18097350|K08245 phytepsin [EC:3.4.23.40] | (RefSeq) aspartic proteinase	--	[O]	Posttranslational modification, protein turnover, chaperones	Eukaryotic aspartyl protease	Aspartic proteinase OS=Cucurbita pepo OX=3663 PE=2 SV=1	O	Posttranslational modification, protein turnover, chaperones	hypothetical protein POPTR_004G007600 [Populus trichocarpa]
gene-POPTR_007G090600	RAP2-4	6.57086	6.49952	7.47617	30.3491	31.7027	29.1869	1.93962e-214	2.20063	up	--	--	Molecular Function: transcription factor activity, sequence-specific DNA binding (GO:0003700);; Cellular Component: nucleus (GO:0005634);; Molecular Function: sequence-specific DNA binding (GO:0043565);;	K09286|4.9e-202|pop:7456918|K09286 EREBP-like factor | (RefSeq) ethylene-responsive transcription factor RAP2-4	--	--	--	AP2 domain	Ethylene-responsive transcription factor RAP2-4 OS=Arabidopsis thaliana OX=3702 GN=RAP2-4 PE=1 SV=1	K	Transcription	ethylene-responsive transcription factor RAP2-4 [Populus trichocarpa]
gene-POPTR_001G245900	UGT76A2	0.029919	0.023643	0.036226	1.43809	1.04127	1.36136	1.72084e-23	4.70927	up	[G]	Carbohydrate transport and metabolism	Molecular Function: UDP-glycosyltransferase activity (GO:0008194);; Cellular Component: intracellular membrane-bounded organelle (GO:0043231);; Molecular Function: quercetin 3-O-glucosyltransferase activity (GO:0080043);; Molecular Function: quercetin 7-O-glucosyltransferase activity (GO:0080044);;	K13493|1.2e-106|csat:104768782|K13493 cytokinin-N-glucosyltransferase [EC:2.4.1.-] | (RefSeq) UDP-glycosyltransferase 76C2-like	Zeatin biosynthesis (ko00908)	[GC]	Carbohydrate transport and metabolism;; Energy production and conversion	UDP-glucoronosyl and UDP-glucosyl transferase	UDP-glucose iridoid glucosyltransferase OS=Catharanthus roseus OX=4058 GN=UGT76A2 PE=1 SV=1	--	--	UDP-glucose iridoid glucosyltransferase [Populus trichocarpa]
gene-POPTR_014G104800	NAC043	0.55693	1.09891	0.812798	2.08862	2.11163	1.6496	2.54306e-06	1.26071	up	--	--	Molecular Function: DNA binding (GO:0003677);; Cellular Component: nucleus (GO:0005634);; Biological Process: regulation of transcription, DNA-templated (GO:0006355);;	K00521|2.9e-32|cmos:111447866|K00521 ferric-chelate reductase [EC:1.16.1.7] | (RefSeq) ferric reduction oxidase 7, chloroplastic-like	--	--	--	No apical meristem (NAM) protein	NAC domain-containing protein 43 OS=Arabidopsis thaliana OX=3702 GN=NAC043 PE=2 SV=2	K	Transcription	NAC domain-containing protein 43 [Populus trichocarpa]
gene-POPTR_007G026800	At2g25737	0.097963	0.099027	0.109031	0.562674	0.708381	0.511013	1.22848e-08	2.36019	up	--	--	Cellular Component: integral component of membrane (GO:0016021);; Biological Process: protein ubiquitination (GO:0016567);; Cellular Component: Cul4A-RING E3 ubiquitin ligase complex (GO:0031464);;	--	--	--	--	Sulfite exporter TauE/SafE	Sulfite exporter TauE/SafE family protein 3 OS=Arabidopsis thaliana OX=3702 GN=At2g25737 PE=2 SV=1	S	Function unknown	sulfite exporter TauE/SafE family protein 3 [Populus trichocarpa]
gene-POPTR_007G135100	ATHB-17	2.29304	1.77583	2.30816	9.38024	10.232	9.61823	6.47669e-37	2.21257	up	--	--	Cellular Component: nucleus (GO:0005634);; Biological Process: regulation of transcription, DNA-templated (GO:0006355);; Molecular Function: sequence-specific DNA binding (GO:0043565);;	K22756|2.8e-17|nto:104088813|K22756 E3 SUMO-protein ligase NSE2 [EC:2.3.2.-] | (RefSeq) E3 SUMO-protein ligase MMS21 isoform X1	--	[K]	Transcription	Homeodomain	Homeobox-leucine zipper protein ATHB-17 OS=Arabidopsis thaliana OX=3702 GN=ATHB-17 PE=2 SV=1	K	Transcription	homeobox-leucine zipper protein ATHB-52 [Populus trichocarpa]
gene-POPTR_017G017100	MGP	2.38958	2.26748	2.24688	4.41459	4.57116	4.8472	1.22953e-16	1.0469	up	--	--	--	K12309|1.6e-88|lja:Lj3g3v0323160.1|K12309 beta-galactosidase [EC:3.2.1.23] | (RefSeq) Lj3g3v0323160.1; -	Galactose metabolism (ko00052);; Other glycan degradation (ko00511);; Glycosaminoglycan degradation (ko00531);; Sphingolipid metabolism (ko00600);; Glycosphingolipid biosynthesis - ganglio series (ko00604)	[R]	General function prediction only	--	Zinc finger protein MAGPIE OS=Arabidopsis thaliana OX=3702 GN=MGP PE=1 SV=1	S	Function unknown	zinc finger protein NUTCRACKER [Populus trichocarpa]
gene-POPTR_001G028300	--	2.60166	3.03853	2.97878	7.62225	8.24951	8.66104	4.37534e-33	1.55036	up	--	--	Cellular Component: nucleus (GO:0005634);; Cellular Component: cytoplasm (GO:0005737);;	--	--	[S]	Function unknown	Armadillo/beta-catenin-like repeat	--	L	Replication, recombination and repair	protein spotted leaf 11 [Populus trichocarpa]
gene-POPTR_018G132200	HKT6	0.376601	0.483453	0.492122	14.6579	14.086	15.8371	6.08473e-226	5.04048	up	[P]	Inorganic ion transport and metabolism	Cellular Component: plasma membrane (GO:0005886);; Molecular Function: cation transmembrane transporter activity (GO:0008324);; Molecular Function: sodium ion transmembrane transporter activity (GO:0015081);; Cellular Component: integral component of membrane (GO:0016021);;	--	--	[P]	Inorganic ion transport and metabolism	Cation transport protein	Probable cation transporter HKT6 OS=Oryza sativa subsp. japonica OX=39947 GN=HKT6 PE=2 SV=2	P	Inorganic ion transport and metabolism	sodium transporter HKT1 [Populus trichocarpa]
gene-POPTR_002G030400	JAL3	6.26164	7.47038	6.57065	30.4814	31.7921	32.4716	2.38618e-178	2.2683	up	--	--	Molecular Function: carbohydrate binding (GO:0030246);;	K03695|1.3e-27|adu:107486671|K03695 ATP-dependent Clp protease ATP-binding subunit ClpB | (RefSeq) LOW QUALITY PROTEIN: chaperone protein ClpB3, chloroplastic-like	--	--	--	Jacalin-like lectin domain	Jacalin-related lectin 3 OS=Arabidopsis thaliana OX=3702 GN=JAL3 PE=2 SV=1	S	Function unknown	jacalin-related lectin 3 isoform X1 [Populus trichocarpa]
gene-POPTR_004G057500	--	1.66399	1.42605	1.68812	6.87732	7.39976	7.97426	7.18976e-46	2.24379	up	--	--	--	K12761|4.5e-44|ini:109164801|K12761 carbon catabolite-derepressing protein kinase [EC:2.7.11.1] | (RefSeq) CBL-interacting serine/threonine-protein kinase 7-like	--	--	--	Domain of unknown function (DUF4228)	--	S	Function unknown	uncharacterized protein LOC7476339 [Populus trichocarpa]
gene-POPTR_014G127000	PME7	0.106762	0	0	2.24105	1.90844	1.9894	0.00704877	2.30024	up	[GI]	Carbohydrate transport and metabolism;; Lipid transport and metabolism	Molecular Function: pectinesterase activity (GO:0030599);; Biological Process: cell wall modification (GO:0042545);; Molecular Function: aspartyl esterase activity (GO:0045330);; Biological Process: pectin catabolic process (GO:0045490);; Molecular Function: pectinesterase inhibitor activity (GO:0046910);;	K01051|0.0e+00|pop:7495241|K01051 pectinesterase [EC:3.1.1.11] | (RefSeq) probable pectinesterase/pectinesterase inhibitor 7	Pentose and glucuronate interconversions (ko00040)	--	--	Pectinesterase	Probable pectinesterase/pectinesterase inhibitor 7 OS=Arabidopsis thaliana OX=3702 GN=PME7 PE=2 SV=1	G	Carbohydrate transport and metabolism	probable pectinesterase/pectinesterase inhibitor 7 [Populus trichocarpa]
gene-POPTR_008G026600	GAT1	0.610318	0.626666	0.591753	6.82518	5.79311	5.56693	1.5766e-77	3.31434	up	--	--	Biological Process: amino acid transmembrane transport (GO:0003333);; Cellular Component: plasma membrane (GO:0005886);; Molecular Function: amino acid transmembrane transporter activity (GO:0015171);; Cellular Component: integral component of membrane (GO:0016021);;	K15015|4.8e-13|lang:109332400|K15015 solute carrier family 32 (vesicular inhibitory amino acid transporter) | (RefSeq) vacuolar amino acid transporter 1-like	--	[E]	Amino acid transport and metabolism	Transmembrane amino acid transporter protein	GABA transporter 1 OS=Arabidopsis thaliana OX=3702 GN=GAT1 PE=1 SV=1	E	Amino acid transport and metabolism	GABA transporter 1 [Populus trichocarpa]
gene-POPTR_001G374100	HGO	8.66154	8.42106	8.96777	31.1274	30.1805	31.3171	8.86629e-205	1.88043	up	[Q]	Secondary metabolites biosynthesis, transport and catabolism	Molecular Function: homogentisate 1,2-dioxygenase activity (GO:0004411);; Biological Process: L-phenylalanine catabolic process (GO:0006559);; Biological Process: tyrosine metabolic process (GO:0006570);;	K00451|4.3e-288|pop:7485142|K00451 homogentisate 1,2-dioxygenase [EC:1.13.11.5] | (RefSeq) homogentisate 1,2-dioxygenase	Tyrosine metabolism (ko00350)	[E]	Amino acid transport and metabolism	homogentisate 1,2-dioxygenase	Homogentisate 1,2-dioxygenase OS=Arabidopsis thaliana OX=3702 GN=HGO PE=2 SV=2	E	Amino acid transport and metabolism	homogentisate 1,2-dioxygenase [Populus trichocarpa]
gene-POPTR_009G011100	UXT1	7.14685	7.00702	6.88061	38.9979	41.577	37.3061	4.64684e-190	2.53042	up	--	--	Cellular Component: integral component of membrane (GO:0016021);;	K15285|1.7e-180|pop:7472127|K15285 solute carrier family 35, member E3 | (RefSeq) UDP-xylose transporter 1 isoform X2	--	[GE]	Carbohydrate transport and metabolism;; Amino acid transport and metabolism	Triose-phosphate Transporter family	UDP-xylose transporter 1 OS=Arabidopsis thaliana OX=3702 GN=UXT1 PE=1 SV=1	--	--	UDP-xylose transporter 1 isoform X3 [Populus trichocarpa]
gene-POPTR_012G027800	YSL3	20.7737	20.5753	23.0378	43.7751	43.1922	45.6795	1.11049e-63	1.08626	up	--	--	Cellular Component: integral component of membrane (GO:0016021);; Biological Process: transmembrane transport (GO:0055085);;	K15363|1.6e-24|bna:111210893|K15363 fanconi-associated nuclease 1 [EC:3.1.21.- 3.1.4.1] | (RefSeq) fanconi-associated nuclease 1 homolog	--	--	--	OPT oligopeptide transporter protein	Metal-nicotianamine transporter YSL3 OS=Arabidopsis thaliana OX=3702 GN=YSL3 PE=2 SV=1	S	Function unknown	hypothetical protein POPTR_012G027800 [Populus trichocarpa]
gene-POPTR_017G144800	RVE1	4.30951	4.59197	4.68873	14.4196	14.9328	13.9498	1.40017e-95	1.7198	up	--	--	Molecular Function: DNA binding (GO:0003677);; Cellular Component: nucleus (GO:0005634);;	K12133|5.5e-36|ppp:112280611|K12133 MYB-related transcription factor LHY | (RefSeq) uncharacterized protein LOC112280611	Circadian rhythm - plant (ko04712)	[O]	Posttranslational modification, protein turnover, chaperones	Myb-like DNA-binding domain	Protein REVEILLE 1 OS=Arabidopsis thaliana OX=3702 GN=RVE1 PE=1 SV=1	K	Transcription	protein REVEILLE 1 [Populus trichocarpa]
gene-POPTR_014G030500	--	6.832	6.41925	4.97502	53.7649	57.1947	65.2481	8.92405e-175	3.30188	up	--	--	Molecular Function: calcium ion binding (GO:0005509);;	K02183|1.7e-21|pda:113462379|K02183 calmodulin | (RefSeq) calmodulin-1-like	MAPK signaling pathway - plant (ko04016);; Phosphatidylinositol signaling system (ko04070);; Plant-pathogen interaction (ko04626)	--	--	EF hand	--	S	Function unknown	hypothetical protein POPTR_014G030500 [Populus trichocarpa]
gene-POPTR_004G038700	--	4.97799	4.30465	4.91626	20.4523	19.0515	19.4673	6.44489e-92	2.09777	up	--	--	--	--	--	--	--	Protein of unknown function (DUF1218)	--	S	Function unknown	uncharacterized protein LOC7494353 [Populus trichocarpa]
gene-POPTR_016G068200	NFYA2	0.444583	0.389134	0.52341	1.33534	1.5076	1.29957	6.99481e-09	1.57863	up	--	--	Molecular Function: RNA polymerase II core promoter proximal region sequence-specific DNA binding (GO:0000978);; Molecular Function: transcription factor activity, sequence-specific DNA binding (GO:0003700);; Cellular Component: nucleus (GO:0005634);; Biological Process: regulation of transcription, DNA-templated (GO:0006355);;	K08064|5.6e-186|pop:7469937|K08064 nuclear transcription factor Y, alpha | (RefSeq) nuclear transcription factor Y subunit A-10	--	[K]	Transcription	CCAAT-binding transcription factor (CBF-B/NF-YA) subunit B	Nuclear transcription factor Y subunit A-2 OS=Arabidopsis thaliana OX=3702 GN=NFYA2 PE=2 SV=1	K	Transcription	nuclear transcription factor Y subunit A-10 [Populus trichocarpa]
gene-POPTR_008G124900	LPP3	0.123029	0.112889	0.05246	3.79114	4.10925	3.98534	1.35381e-79	5.17574	up	--	--	Biological Process: phospholipid metabolic process (GO:0006644);; Molecular Function: phosphatidate phosphatase activity (GO:0008195);; Cellular Component: integral component of membrane (GO:0016021);;	K18693|6.7e-184|pop:7488376|K18693 diacylglycerol diphosphate phosphatase / phosphatidate phosphatase [EC:3.1.3.81 3.1.3.4] | (RefSeq) putative lipid phosphate phosphatase 3, chloroplastic isoform X2	Glycerolipid metabolism (ko00561);; Glycerophospholipid metabolism (ko00564)	[I]	Lipid transport and metabolism	PAP2 superfamily	Putative lipid phosphate phosphatase 3, chloroplastic OS=Arabidopsis thaliana OX=3702 GN=LPP3 PE=2 SV=1	I	Lipid transport and metabolism	putative lipid phosphate phosphatase 3, chloroplastic isoform X2 [Populus trichocarpa]
gene-POPTR_019G071000	WSD1	39.5106	33.4148	40.4639	99.8488	88.9158	82.4684	4.27549e-69	1.30947	up	[Q]	Secondary metabolites biosynthesis, transport and catabolism	Molecular Function: diacylglycerol O-acyltransferase activity (GO:0004144);; Cellular Component: plasma membrane (GO:0005886);; Biological Process: triglyceride biosynthetic process (GO:0019432);; Molecular Function: long-chain-alcohol O-fatty-acyltransferase activity (GO:0047196);;	K15406|4.6e-94|bna:106451554|K15406 wax-ester synthase / diacylglycerol O-acyltransferase [EC:2.3.1.75 2.3.1.20] | (RefSeq) O-acyltransferase WSD1	Cutin, suberine and wax biosynthesis (ko00073)	--	--	WS/DGAT C-terminal domain	O-acyltransferase WSD1 OS=Arabidopsis thaliana OX=3702 GN=WSD1 PE=2 SV=1	S	Function unknown	O-acyltransferase WSD1 [Populus trichocarpa]
gene-POPTR_006G254100	EBF1	24.1254	21.4562	26.2779	57.1157	52.4461	54.0356	1.29863e-82	1.23949	up	--	--	Biological Process: ubiquitin-dependent protein catabolic process (GO:0006511);; Cellular Component: SCF ubiquitin ligase complex (GO:0019005);; Biological Process: SCF-dependent proteasomal ubiquitin-dependent protein catabolic process (GO:0031146);;	K14515|2.9e-274|pop:7471592|K14515 EIN3-binding F-box protein | (RefSeq) EIN3-binding F-box protein 1	MAPK signaling pathway - plant (ko04016);; Plant hormone signal transduction (ko04075)	[R]	General function prediction only	Leucine Rich repeat	EIN3-binding F-box protein 1 OS=Arabidopsis thaliana OX=3702 GN=EBF1 PE=1 SV=1	S	Function unknown	EIN3-binding F-box protein 1 [Populus trichocarpa]
gene-POPTR_001G366500	--	0.523248	0.445496	0.509805	4.49632	3.90063	3.59603	7.63848e-41	3.00011	up	--	--	--	--	--	--	--	--	--	--	--	uncharacterized protein LOC7487537 [Populus trichocarpa]
gene-POPTR_002G002200	--	2.14286	1.73702	2.10609	6.04081	5.69902	6.27398	5.85068e-36	1.64697	up	--	--	--	--	--	--	--	PLATZ transcription factor	--	S	Function unknown	uncharacterized protein LOC7474539 [Populus trichocarpa]
gene-POPTR_019G049200	At2g40480	16.6896	10.9674	15.8205	42.1795	30.9293	44.2642	4.0966e-10	1.46573	up	--	--	Cellular Component: cytosol (GO:0005829);; Biological Process: chloroplast avoidance movement (GO:0009903);; Biological Process: chloroplast accumulation movement (GO:0009904);;	--	--	--	--	Weak chloroplast movement under blue light	WEB family protein At2g40480 OS=Arabidopsis thaliana OX=3702 GN=At2g40480 PE=2 SV=1	S	Function unknown	WEB family protein At2g40480 isoform X2 [Populus trichocarpa]
gene-POPTR_016G124300	--	0.6796	0.751264	0.716984	2.38258	1.67037	2.6758	1.84455e-06	1.60946	up	--	--	--	--	--	--	--	--	--	--	--	hypothetical protein POPTR_016G124300 [Populus trichocarpa]
gene-POPTR_017G034901	4CLL6	0.227252	0.232995	0.259459	2.58056	1.83407	2.39651	1.33881e-53	3.23432	up	[IQ]	Lipid transport and metabolism;; Secondary metabolites biosynthesis, transport and catabolism	Molecular Function: catalytic activity (GO:0003824);;	K01904|8.5e-60|ccaj:109788437|K01904 4-coumarate--CoA ligase [EC:6.2.1.12] | (RefSeq) 4-coumarate--CoA ligase-like 9	Ubiquinone and other terpenoid-quinone biosynthesis (ko00130);; Phenylpropanoid biosynthesis (ko00940)	[I]	Lipid transport and metabolism	AMP-binding enzyme C-terminal domain	4-coumarate--CoA ligase-like 6 OS=Oryza sativa subsp. japonica OX=39947 GN=4CLL6 PE=2 SV=2	I	Lipid transport and metabolism	hypothetical protein POPTR_017G034901 [Populus trichocarpa]
gene-POPTR_010G172600	MTP10	1.96982	1.59186	1.90548	8.61564	9.89683	7.73158	6.54324e-57	2.29151	up	[P]	Inorganic ion transport and metabolism	Cellular Component: plasma membrane (GO:0005886);; Biological Process: cellular cadmium ion homeostasis (GO:0006876);; Biological Process: cellular iron ion homeostasis (GO:0006879);; Biological Process: cellular zinc ion homeostasis (GO:0006882);; Molecular Function: cation transmembrane transporter activity (GO:0008324);; Molecular Function: cadmium ion transmembrane transporter activity (GO:00…	--	--	[P]	Inorganic ion transport and metabolism	Cation efflux family	Metal tolerance protein 10 OS=Arabidopsis thaliana OX=3702 GN=MTP10 PE=2 SV=1	P	Inorganic ion transport and metabolism	metal tolerance protein 9 [Populus trichocarpa]
gene-POPTR_003G142800	ABIL2	0.292122	0.155126	0.319642	5.62285	5.75927	5.04719	1.61477e-77	4.33903	up	--	--	--	--	--	--	--	--	Protein ABIL2 OS=Arabidopsis thaliana OX=3702 GN=ABIL2 PE=2 SV=1	S	Function unknown	protein ABIL2 [Populus trichocarpa]
gene-POPTR_006G113800	At5g41590	0.186739	0.162943	0.061084	1.54452	1.24752	1.21854	3.64603e-12	3.03695	up	--	--	--	--	--	--	--	LURP-one-related	Protein LURP-one-related 17 OS=Arabidopsis thaliana OX=3702 GN=At5g41590 PE=2 SV=2	S	Function unknown	protein LURP-one-related 5 [Populus trichocarpa]
gene-POPTR_014G100700	PPOX2	11.2915	11.3921	11.5742	24.5955	27.3215	25.3552	2.55632e-90	1.27777	up	[S]	Function unknown	Molecular Function: pyridoxamine-phosphate oxidase activity (GO:0004733);; Biological Process: pyridoxine biosynthetic process (GO:0008615);; Molecular Function: FMN binding (GO:0010181);;	K00275|9.9e-117|pop:7492788|K00275 pyridoxamine 5'-phosphate oxidase [EC:1.4.3.5] | (RefSeq) pyridoxine/pyridoxamine 5'-phosphate oxidase 2 isoform X1	Vitamin B6 metabolism (ko00750)	[S]	Function unknown	Pyridoxamine 5'-phosphate oxidase	Pyridoxine/pyridoxamine 5'-phosphate oxidase 2 OS=Arabidopsis thaliana OX=3702 GN=PPOX2 PE=1 SV=2	S	Function unknown	pyridoxine/pyridoxamine 5'-phosphate oxidase 2 isoform X1 [Populus trichocarpa]
gene-POPTR_011G039300	At1g11300	0	0.03004	0	0.357242	0.369104	0.499994	1.46152e-13	4.42705	up	[T]	Signal transduction mechanisms	Molecular Function: protein serine/threonine kinase activity (GO:0004674);; Molecular Function: ATP binding (GO:0005524);; Cellular Component: plasma membrane (GO:0005886);; Biological Process: protein phosphorylation (GO:0006468);; Cellular Component: integral component of membrane (GO:0016021);; Biological Process: recognition of pollen (GO:0048544);;	K24104|6.4e-77|thj:104799061|K24104 GPN-loop GTPase | (RefSeq) LOW QUALITY PROTEIN: uncharacterized protein LOC104799061	--	--	--	Protein tyrosine and serine/threonine kinase	G-type lectin S-receptor-like serine/threonine-protein kinase At1g11300 OS=Arabidopsis thaliana OX=3702 GN=At1g11300 PE=2 SV=1	T	Signal transduction mechanisms	G-type lectin S-receptor-like serine/threonine-protein kinase At1g11330 [Populus trichocarpa]
gene-POPTR_004G085600	NUDT18	7.48739	7.43343	7.17853	34.0055	31.6936	33.2702	1.37694e-160	2.20887	up	[FR]	Nucleotide transport and metabolism;; General function prediction only	Cellular Component: nucleus (GO:0005634);; Cellular Component: cytoplasm (GO:0005737);; Molecular Function: hydrolase activity (GO:0016787);;	K07766|1.0e-107|pop:7493565|K07766 diphosphoinositol-polyphosphate diphosphatase [EC:3.6.1.52] | (RefSeq) nudix hydrolase 18, mitochondrial	--	[T]	Signal transduction mechanisms	NUDIX domain	Nudix hydrolase 18, mitochondrial OS=Arabidopsis thaliana OX=3702 GN=NUDT18 PE=2 SV=1	T	Signal transduction mechanisms	nudix hydrolase 18, mitochondrial [Populus trichocarpa]
gene-POPTR_003G119600	SGR	4.8164	5.35201	5.35118	9.70177	10.5184	9.94337	1.85897e-20	1.00823	up	--	--	Cellular Component: cellular_component (GO:0005575);; Cellular Component: intracellular (GO:0005622);; Cellular Component: cell (GO:0005623);; Cellular Component: cytoplasm (GO:0005737);; Cellular Component: chloroplast (GO:0009507);; Cellular Component: plastid envelope (GO:0009526);; Cellular Component: plastid stroma (GO:0009532);; Cellular Component: plastid (GO:0009536);; Cellular Component:…	K22013|8.4e-159|pop:7465829|K22013 magnesium dechelatase [EC:4.99.1.10] | (RefSeq) protein STAY-GREEN 1, chloroplastic	Porphyrin and chlorophyll metabolism (ko00860)	--	--	Staygreen protein	Protein STAY-GREEN homolog, chloroplastic OS=Capsicum annuum OX=4072 GN=SGR PE=1 SV=2	S	Function unknown	protein STAY-GREEN 1, chloroplastic [Populus trichocarpa]
gene-POPTR_004G233400	At5g61530	20.3773	20.2006	21.2934	46.9463	48.8139	46.4786	4.40903e-110	1.25248	up	--	--	Biological Process: signal transduction (GO:0007165);;	--	--	[T]	Signal transduction mechanisms	RhoGAP domain	Uncharacterized Rho GTPase-activating protein At5g61530 OS=Arabidopsis thaliana OX=3702 GN=At5g61530 PE=1 SV=2	T	Signal transduction mechanisms	uncharacterized Rho GTPase-activating protein At5g61530 [Populus trichocarpa]
gene-POPTR_008G197832	RBK2	0.296158	0.440032	0.419941	2.0876	2.20035	1.91274	5.97978e-08	2.23202	up	[T]	Signal transduction mechanisms	Molecular Function: protein kinase activity (GO:0004672);; Molecular Function: ATP binding (GO:0005524);;	K01534|7.9e-15|var:108330779|K01534 Zn2+/Cd2+-exporting ATPase [EC:7.2.2.12 7.2.2.21] | (RefSeq) cadmium/zinc-transporting ATPase HMA3-like	--	[T]	Signal transduction mechanisms	Protein tyrosine and serine/threonine kinase	Receptor-like cytosolic serine/threonine-protein kinase RBK2 OS=Arabidopsis thaliana OX=3702 GN=RBK2 PE=1 SV=1	T	Signal transduction mechanisms	hypothetical protein POPTR_008G197832 [Populus trichocarpa]
gene-POPTR_001G213100	--	1.18804	1.85391	1.20505	4.65655	7.11345	6.25146	9.74248e-12	2.03682	up	--	--	--	--	--	--	--	--	--	--	--	hypothetical protein POPTR_001G213100 [Populus trichocarpa]
gene-POPTR_014G087700	BRH1	8.47325	8.16347	7.49484	21.3824	21.4965	19.772	7.9387e-61	1.42275	up	--	--	Molecular Function: zinc ion binding (GO:0008270);; Cellular Component: integral component of membrane (GO:0016021);; Biological Process: protein ubiquitination (GO:0016567);; Molecular Function: ubiquitin protein ligase activity (GO:0061630);;	K16281|6.6e-98|pop:7496987|K16281 RING-H2 zinc finger protein RHA1 | (RefSeq) E3 ubiquitin-protein ligase RHA1B	--	[O]	Posttranslational modification, protein turnover, chaperones	Ring finger domain	Brassinosteroid-responsive RING protein 1 OS=Arabidopsis thaliana OX=3702 GN=BRH1 PE=2 SV=1	O	Posttranslational modification, protein turnover, chaperones	E3 ubiquitin-protein ligase RHA1B [Populus trichocarpa]
gene-POPTR_006G017700	--	0	0.055821	0	3.44505	3.91524	3.16106	1.42609e-25	5.82023	up	--	--	--	--	--	--	--	--	--	S	Function unknown	uncharacterized protein LOC7463701 [Populus trichocarpa]
gene-POPTR_018G095200	XTH23	0.93879	0.535439	0.882542	2.16571	2.26094	1.76818	1.1354e-07	1.39935	up	[G]	Carbohydrate transport and metabolism	Molecular Function: hydrolase activity, hydrolyzing O-glycosyl compounds (GO:0004553);; Cellular Component: cell wall (GO:0005618);; Biological Process: xyloglucan metabolic process (GO:0010411);; Molecular Function: xyloglucan:xyloglucosyl transferase activity (GO:0016762);; Biological Process: cell wall biogenesis (GO:0042546);; Cellular Component: apoplast (GO:0048046);; Biological Process: ce…	K14504|2.1e-168|pop:7461592|K14504 xyloglucan:xyloglucosyl transferase TCH4 [EC:2.4.1.207] | (RefSeq) probable xyloglucan endotransglucosylase/hydrolase protein 23	Plant hormone signal transduction (ko04075)	--	--	Glycosyl hydrolases family 16	Probable xyloglucan endotransglucosylase/hydrolase protein 23 OS=Arabidopsis thaliana OX=3702 GN=XTH23 PE=2 SV=1	G	Carbohydrate transport and metabolism	probable xyloglucan endotransglucosylase/hydrolase protein 23 [Populus trichocarpa]
gene-POPTR_005G053800	AUX22B	56.5971	51.1863	64.4033	210.01	212.547	211.52	1.68373e-210	1.93251	up	--	--	Cellular Component: nucleus (GO:0005634);; Biological Process: regulation of transcription, DNA-templated (GO:0006355);; Biological Process: auxin-activated signaling pathway (GO:0009734);;	K14484|1.1e-110|pop:18098972|K14484 auxin-responsive protein IAA | (RefSeq) auxin-induced protein 22B	Plant hormone signal transduction (ko04075)	--	--	AUX/IAA family	Auxin-induced protein 22B OS=Vigna radiata var. radiata OX=3916 GN=AUX22B PE=2 SV=1	K	Transcription	auxin-induced protein 22B [Populus trichocarpa]
gene-POPTR_004G153200	--	2.35157	1.78663	1.84384	11.5995	11.0121	13.4479	5.91636e-53	2.60136	up	--	--	--	--	--	--	--	Organ specific protein	--	S	Function unknown	uncharacterized protein LOC7461210 [Populus trichocarpa]
gene-POPTR_008G175100	HSP26-A	2.69587	1.97332	2.0193	4.29814	4.70507	4.09133	5.30572e-07	1.00116	up	[O]	Posttranslational modification, protein turnover, chaperones	Molecular Function: glutathione transferase activity (GO:0004364);; Cellular Component: cytoplasm (GO:0005737);; Biological Process: glutathione metabolic process (GO:0006749);;	K00799|1.7e-128|pop:18101623|K00799 glutathione S-transferase [EC:2.5.1.18] | (RefSeq) probable glutathione S-transferase	Glutathione metabolism (ko00480)	[O]	Posttranslational modification, protein turnover, chaperones	Glutathione S-transferase, N-terminal domain	Probable glutathione S-transferase OS=Glycine max OX=3847 GN=HSP26-A PE=2 SV=1	O	Posttranslational modification, protein turnover, chaperones	probable glutathione S-transferase [Populus trichocarpa]
gene-POPTR_004G226800	GXM1	0.531804	0.585198	0.472871	1.92628	1.77387	2.43336	1.86438e-13	1.9341	up	[R]	General function prediction only	Cellular Component: Golgi apparatus (GO:0005794);; Molecular Function: methyltransferase activity (GO:0008168);; Biological Process: plant-type secondary cell wall biogenesis (GO:0009834);; Biological Process: methylation (GO:0032259);; Biological Process: xylan metabolic process (GO:0045491);; Biological Process: xylan biosynthetic process (GO:0045492);;	K18801|3.1e-167|pop:18098343|K18801 glucuronoxylan 4-O-methyltransferase [EC:2.1.1.112] | (RefSeq) glucuronoxylan 4-O-methyltransferase 1	--	--	--	Polysaccharide biosynthesis	Glucuronoxylan 4-O-methyltransferase 1 OS=Arabidopsis thaliana OX=3702 GN=GXM1 PE=1 SV=1	S	Function unknown	glucuronoxylan 4-O-methyltransferase 1 [Populus trichocarpa]
gene-POPTR_002G179800	APRR5	5.02661	5.6152	5.83415	13.9506	13.6771	14.0565	1.51506e-69	1.38837	up	[TK]	Signal transduction mechanisms;; Transcription	Biological Process: phosphorelay signal transduction system (GO:0000160);;	K12130|0.0e+00|pop:7487745|K12130 pseudo-response regulator 5 | (RefSeq) two-component response regulator-like PRR95 isoform X1	Circadian rhythm - plant (ko04712)	[K]	Transcription	Response regulator receiver domain	Two-component response regulator-like APRR5 OS=Arabidopsis thaliana OX=3702 GN=APRR5 PE=1 SV=2	K	Transcription	two-component response regulator-like PRR95 isoform X3 [Populus trichocarpa]
gene-POPTR_017G015600	RPPL1	0.64665	0.694514	0.815115	1.49141	1.19329	1.56043	1.24708e-09	1.0156	up	[K]	Transcription	Molecular Function: ADP binding (GO:0043531);;	K12818|1.2e-168|mtr:MTR_0267s0070|K12818 ATP-dependent RNA helicase DHX8/PRP22 [EC:3.6.4.13] | (RefSeq) NB-ARC domain disease resistance protein, putative	Spliceosome (ko03040)	[T]	Signal transduction mechanisms	NB-ARC domain	Putative disease resistance RPP13-like protein 1 OS=Arabidopsis thaliana OX=3702 GN=RPPL1 PE=3 SV=1	T	Signal transduction mechanisms	putative disease resistance RPP13-like protein 1 [Populus trichocarpa]
gene-POPTR_019G031400	NAC047	3.06877	3.4727	3.06874	7.87107	8.6527	7.33781	1.90996e-28	1.35474	up	--	--	Molecular Function: DNA binding (GO:0003677);; Cellular Component: nucleus (GO:0005634);; Biological Process: regulation of transcription, DNA-templated (GO:0006355);;	K00521|3.2e-44|cmos:111447866|K00521 ferric-chelate reductase [EC:1.16.1.7] | (RefSeq) ferric reduction oxidase 7, chloroplastic-like	--	--	--	No apical meristem (NAM) protein	NAC transcription factor 47 OS=Arabidopsis thaliana OX=3702 GN=NAC047 PE=2 SV=1	K	Transcription	NAC transcription factor 47 [Populus trichocarpa]
gene-POPTR_001G139600	ABCB2	0.086476	0.250437	0.08119	0.900434	0.625273	0.770621	8.52549e-13	2.38376	up	[V]	Defense mechanisms	Molecular Function: ATP binding (GO:0005524);; Cellular Component: integral component of membrane (GO:0016021);; Molecular Function: ATPase activity (GO:0016887);; Molecular Function: ATPase activity, coupled to transmembrane movement of substances (GO:0042626);;	K05658|0.0e+00|pop:7455796|K05658 ATP-binding cassette, subfamily B (MDR/TAP), member 1 [EC:7.6.2.2] | (RefSeq) ABC transporter B family member 2 isoform X1	ABC transporters (ko02010)	[Q]	Secondary metabolites biosynthesis, transport and catabolism	ABC transporter transmembrane region	ABC transporter B family member 2 OS=Arabidopsis thaliana OX=3702 GN=ABCB2 PE=1 SV=3	Q	Secondary metabolites biosynthesis, transport and catabolism	ABC transporter B family member 2 isoform X1 [Populus trichocarpa]
gene-POPTR_014G179100	KAO1	18.9155	18.1582	18.625	63.2639	71.4528	65.3223	5.66146e-260	1.89463	up	[QV]	Secondary metabolites biosynthesis, transport and catabolism;; Defense mechanisms	Molecular Function: monooxygenase activity (GO:0004497);; Molecular Function: iron ion binding (GO:0005506);; Cellular Component: integral component of membrane (GO:0016021);; Molecular Function: oxidoreductase activity, acting on paired donors, with incorporation or reduction of molecular oxygen (GO:0016705);; Molecular Function: heme binding (GO:0020037);;	K04123|4.9e-290|pop:7469386|K04123 ent-kaurenoic acid monooxygenase [EC:1.14.14.107] | (RefSeq) ent-kaurenoic acid oxidase 1 isoform X1	Diterpenoid biosynthesis (ko00904)	[QI]	Secondary metabolites biosynthesis, transport and catabolism;; Lipid transport and metabolism	Cytochrome P450	Ent-kaurenoic acid oxidase 1 OS=Arabidopsis thaliana OX=3702 GN=KAO1 PE=1 SV=1	Q	Secondary metabolites biosynthesis, transport and catabolism	ent-kaurenoic acid oxidase 1 isoform X1 [Populus trichocarpa]
gene-POPTR_019G074400	--	0.887919	1.31425	0.984708	39.593	41.5959	41.2008	0	5.27615	up	--	--	--	--	--	--	--	PDDEXK-like family of unknown function	--	S	Function unknown	hypothetical protein POPTR_019G074400 [Populus trichocarpa]
gene-POPTR_003G018800	AKT2	6.2176	5.29808	6.74827	29.252	28.9784	29.3811	1.52999e-222	2.31648	up	[T]	Signal transduction mechanisms	Molecular Function: voltage-gated potassium channel activity (GO:0005249);; Cellular Component: integral component of membrane (GO:0016021);; Biological Process: regulation of ion transmembrane transport (GO:0034765);;	K21867|0.0e+00|pop:18096622|K21867 potassium channel | (RefSeq) potassium channel AKT2/3	--	[PT]	Inorganic ion transport and metabolism;; Signal transduction mechanisms	Ion transport protein	Potassium channel AKT2/3 OS=Arabidopsis thaliana OX=3702 GN=AKT2 PE=1 SV=1	--	--	potassium channel AKT2/3 [Populus trichocarpa]
gene-POPTR_011G046600	SCPL31	4.2383	4.03091	4.39656	32.863	31.6136	29.8163	0	2.94481	up	[E]	Amino acid transport and metabolism	Molecular Function: serine-type carboxypeptidase activity (GO:0004185);; Cellular Component: vacuole (GO:0005773);; Biological Process: proteolysis involved in cellular protein catabolic process (GO:0051603);;	K16297|2.6e-288|pop:7485569|K16297 serine carboxypeptidase-like clade II [EC:3.4.16.-] | (RefSeq) serine carboxypeptidase-like 31	--	[OE]	Posttranslational modification, protein turnover, chaperones;; Amino acid transport and metabolism	Serine carboxypeptidase	Serine carboxypeptidase-like 31 OS=Arabidopsis thaliana OX=3702 GN=SCPL31 PE=2 SV=2	O	Posttranslational modification, protein turnover, chaperones	serine carboxypeptidase-like 31 [Populus trichocarpa]
gene-POPTR_010G063800	At1g04570	0.200364	0.126349	0.208584	0.456042	0.516716	0.436511	5.47474e-07	1.40568	up	[G]	Carbohydrate transport and metabolism	Cellular Component: integral component of membrane (GO:0016021);;	--	--	--	--	BT1 family	Probable folate-biopterin transporter 8, chloroplastic OS=Arabidopsis thaliana OX=3702 GN=At1g04570 PE=2 SV=1	S	Function unknown	probable folate-biopterin transporter 8, chloroplastic isoform X1 [Populus trichocarpa]
gene-POPTR_008G043900	LBD1	0.296418	0.873461	0.670334	1.36046	1.15352	1.48864	0.00147404	1.11575	up	--	--	--	K02725|2.5e-31|nau:109221636|K02725 20S proteasome subunit alpha 6 [EC:3.4.25.1] | (RefSeq) proteasome subunit alpha type-1-like	Proteasome (ko03050)	--	--	Lateral organ boundaries (LOB) domain	LOB domain-containing protein 1 OS=Arabidopsis thaliana OX=3702 GN=LBD1 PE=2 SV=1	S	Function unknown	LOB domain-containing protein 1 [Populus trichocarpa]
Populus_trichocarpa_newGene_1610	AtMg00810	1.02591	1.29009	1.24157	3.50063	3.86005	3.67048	1.74007e-14	1.64999	up	--	--	Molecular Function: nucleic acid binding (GO:0003676);; Biological Process: DNA integration (GO:0015074);;	K15601|8.4e-60|psom:113331285|K15601 [histone H3]-dimethyl-L-lysine9 demethylase [EC:1.14.11.65] | (RefSeq) lysine-specific demethylase JMJ25-like	--	[R]	General function prediction only	Reverse transcriptase (RNA-dependent DNA polymerase)	Uncharacterized mitochondrial protein AtMg00810 OS=Arabidopsis thaliana OX=3702 GN=AtMg00810 PE=4 SV=1	L	Replication, recombination and repair	uncharacterized protein LOC112327340 [Populus trichocarpa]
gene-POPTR_001G411000	At4g27290	0.027673	0.048973	0.110219	1.00442	0.631611	0.603574	7.52426e-16	3.33382	up	[T]	Signal transduction mechanisms	Molecular Function: protein serine/threonine kinase activity (GO:0004674);; Molecular Function: ATP binding (GO:0005524);; Cellular Component: plasma membrane (GO:0005886);; Biological Process: protein phosphorylation (GO:0006468);; Cellular Component: integral component of membrane (GO:0016021);; Biological Process: recognition of pollen (GO:0048544);;	K24104|2.5e-76|thj:104799061|K24104 GPN-loop GTPase | (RefSeq) LOW QUALITY PROTEIN: uncharacterized protein LOC104799061	--	--	--	Protein tyrosine and serine/threonine kinase	G-type lectin S-receptor-like serine/threonine-protein kinase At4g27290 OS=Arabidopsis thaliana OX=3702 GN=At4g27290 PE=3 SV=4	T	Signal transduction mechanisms	G-type lectin S-receptor-like serine/threonine-protein kinase At4g27290 [Populus trichocarpa]
gene-POPTR_011G053500	TIF3D1	0.693181	0.662644	0.902691	2.50247	1.41746	2.31747	5.2495e-09	1.47759	up	--	--	Biological Process: formation of cytoplasmic translation initiation complex (GO:0001732);; Biological Process: cap-dependent translational initiation (GO:0002191);; Molecular Function: translation initiation factor activity (GO:0003743);; Cellular Component: eukaryotic translation initiation factor 3 complex (GO:0005852);; Biological Process: translational initiation (GO:0006413);; Cellular Compo…	K03251|0.0e+00|pop:112323318|K03251 translation initiation factor 3 subunit D | (RefSeq) eukaryotic translation initiation factor 3 subunit D-like	RNA transport (ko03013)	[J]	Translation, ribosomal structure and biogenesis	Eukaryotic translation initiation factor 3 subunit 7 (eIF-3)	Eukaryotic translation initiation factor 3 subunit D OS=Arabidopsis thaliana OX=3702 GN=TIF3D1 PE=1 SV=1	J	Translation, ribosomal structure and biogenesis	eukaryotic translation initiation factor 3 subunit D-like [Populus trichocarpa]
gene-POPTR_015G070900	JGB	5.66052	5.65503	6.03366	16.6531	15.939	14.0054	1.23584e-43	1.47215	up	--	--	Molecular Function: protein binding (GO:0005515);;	K15443|2.9e-06|pxb:103960112|K15443 tRNA (guanine-N(7)-)-methyltransferase subunit TRM82 | (RefSeq) tRNA (guanine-N(7)-)-methyltransferase non-catalytic subunit wdr4-like	--	[R]	General function prediction only	WD domain, G-beta repeat	Protein JINGUBANG OS=Arabidopsis thaliana OX=3702 GN=JGB PE=1 SV=1	S	Function unknown	protein JINGUBANG [Populus trichocarpa]
gene-POPTR_019G121300	FLA12	0	0	0	2.41825	2.84668	2.19757	4.53178e-21	6.2595	up	--	--	Cellular Component: plasma membrane (GO:0005886);; Biological Process: plant-type secondary cell wall biogenesis (GO:0009834);;	--	--	--	--	Fasciclin domain	Fasciclin-like arabinogalactan protein 12 OS=Arabidopsis thaliana OX=3702 GN=FLA12 PE=2 SV=2	--	--	fasciclin-like arabinogalactan protein 12 [Populus trichocarpa]
gene-POPTR_004G125000	EDL2	28.3922	25.808	26.7466	69.8662	71.1507	66.3035	6.80243e-125	1.39513	up	--	--	--	--	--	--	--	--	EID1-like F-box protein 2 OS=Arabidopsis thaliana OX=3702 GN=EDL2 PE=1 SV=1	S	Function unknown	EID1-like F-box protein 2 [Populus trichocarpa]
gene-POPTR_002G235800	--	1.10599	1.04067	1.07762	5.02473	5.19653	4.9448	1.17627e-21	2.22923	up	--	--	Molecular Function: cysteine-type endopeptidase inhibitor activity (GO:0004869);;	K13899|2.6e-68|pop:7488594|K13899 cystatin-C | (RefSeq) cysteine proteinase inhibitor B	--	--	--	Aspartic acid proteinase inhibitor	Cysteine proteinase inhibitor B OS=Helianthus annuus OX=4232 PE=1 SV=1	G	Carbohydrate transport and metabolism	cysteine proteinase inhibitor B [Populus trichocarpa]
gene-POPTR_004G038800	DOF4	7.06128	6.77522	7.93959	16.2977	15.6294	13.6755	2.68287e-32	1.11644	up	--	--	Molecular Function: DNA binding (GO:0003677);; Cellular Component: nucleus (GO:0005634);; Biological Process: regulation of transcription, DNA-templated (GO:0006355);;	K20043|1.4e-21|aip:107640400|K20043 clathrin coat assembly protein AP180 | (RefSeq) putative clathrin assembly protein At5g35200	--	--	--	Dof domain, zinc finger	Dof zinc finger protein 4 OS=Oryza sativa subsp. japonica OX=39947 GN=DOF4 PE=2 SV=1	K	Transcription	dof zinc finger protein 4 [Populus trichocarpa]
gene-POPTR_006G094300	--	1.09101	1.30123	1.52799	3.23396	5.05724	4.02758	2.7563e-12	1.66539	up	--	--	--	--	--	--	--	PAR1 protein	--	S	Function unknown	uncharacterized protein LOC7454974 [Populus trichocarpa]
gene-POPTR_002G002000	MIZ1	2.14015	1.93127	1.75657	6.49315	5.8291	6.21472	2.16246e-31	1.70163	up	--	--	Biological Process: hydrotropism (GO:0010274);;	--	--	--	--	Protein of unknown function, DUF617	Protein MIZU-KUSSEI 1 OS=Arabidopsis thaliana OX=3702 GN=MIZ1 PE=1 SV=1	S	Function unknown	protein MIZU-KUSSEI 1 [Populus trichocarpa]
gene-POPTR_009G004800	ZAT5	4.11611	3.84083	4.35188	9.44461	8.42741	8.35595	5.24587e-19	1.1371	up	--	--	Molecular Function: molecular_function (GO:0003674);; Molecular Function: nucleic acid binding (GO:0003676);; Molecular Function: DNA binding (GO:0003677);; Molecular Function: transcription factor activity, sequence-specific DNA binding (GO:0003700);; Molecular Function: binding (GO:0005488);; Cellular Component: cellular_component (GO:0005575);; Cellular Component: intracellular (GO:0005622);; …	--	--	[R]	General function prediction only	C2H2-type zinc finger	Zinc finger protein ZAT5 OS=Arabidopsis thaliana OX=3702 GN=ZAT5 PE=2 SV=1	S	Function unknown	zinc finger protein ZAT5 [Populus trichocarpa]
gene-POPTR_012G135100	--	1.58005	1.05452	1.56991	14.5755	15.1811	15.4319	1.36025e-86	3.42488	up	--	--	Cellular Component: integral component of membrane (GO:0016021);;	K03363|5.7e-08|mtr:MTR_7g055590|K03363 cell division cycle 20, cofactor of APC complex | (RefSeq) transducin family protein/WD-40 repeat protein	Ubiquitin mediated proteolysis (ko04120)	--	--	LysM domain	--	S	Function unknown	hypothetical protein POPTR_012G135100 [Populus trichocarpa]
gene-POPTR_004G049300	NAC073	0.938242	0.90675	0.714306	2.84145	2.67109	2.45724	1.30018e-16	1.65659	up	--	--	Molecular Function: transcription regulatory region sequence-specific DNA binding (GO:0000976);; Cellular Component: nucleus (GO:0005634);; Biological Process: regulation of transcription, DNA-templated (GO:0006355);;	--	--	--	--	No apical meristem (NAM) protein	NAC domain-containing protein 73 OS=Arabidopsis thaliana OX=3702 GN=NAC073 PE=2 SV=1	K	Transcription	NAC domain-containing protein 73 [Populus trichocarpa]
gene-POPTR_017G119900	At1g66810	1.51722	1.54738	1.30242	6.25768	5.99918	6.00086	9.86735e-36	2.08829	up	--	--	Molecular Function: metal ion binding (GO:0046872);;	K18753|2.3e-166|pop:18099442|K18753 butyrate response factor | (RefSeq) zinc finger CCCH domain-containing protein 14 isoform X1	--	[R]	General function prediction only	Zinc finger C-x8-C-x5-C-x3-H type (and similar)	Zinc finger CCCH domain-containing protein 14 OS=Arabidopsis thaliana OX=3702 GN=At1g66810 PE=2 SV=1	S	Function unknown	zinc finger CCCH domain-containing protein 14 isoform X1 [Populus trichocarpa]
gene-POPTR_013G156200	LBD15	0.311031	0.4302	0.357001	1.5715	1.73208	0.969608	1.74916e-11	1.94732	up	--	--	--	K21994|1.1e-27|mtr:MTR_7g074990|K21994 LOB domain-containing protein 18 | (RefSeq) LOB domain protein	--	--	--	Lateral organ boundaries (LOB) domain	LOB domain-containing protein 15 OS=Arabidopsis thaliana OX=3702 GN=LBD15 PE=1 SV=2	S	Function unknown	LOB domain-containing protein 15 isoform X2 [Populus trichocarpa]
gene-POPTR_012G022100	ARP1	1.07642	0.571291	0.755927	3.46606	4.11715	3.48008	5.93238e-30	2.20966	up	[J]	Translation, ribosomal structure and biogenesis	Molecular Function: mRNA binding (GO:0003729);;	K12741|1.5e-19|smo:SELMODRAFT_169811|K12741 heterogeneous nuclear ribonucleoprotein A1/A3 | (RefSeq) hypothetical protein	Spliceosome (ko03040)	[R]	General function prediction only	RNA recognition motif. (a.k.a. RRM, RBD, or RNP domain)	Probable RNA-binding protein ARP1 OS=Arabidopsis thaliana OX=3702 GN=ARP1 PE=2 SV=1	A	RNA processing and modification	RNA-binding protein 24-B isoform X1 [Populus trichocarpa]
gene-POPTR_001G298200	--	23.6335	23.9514	24.6307	91.1571	87.5001	87.5413	4.65165e-304	1.93311	up	--	--	--	K02936|1.6e-25|gab:108459204|K02936 large subunit ribosomal protein L7Ae | (RefSeq) uncharacterized protein LOC108459204	Ribosome (ko03010)	--	--	Protein of unknown function (DUF760)	--	S	Function unknown	uncharacterized protein LOC7465053 [Populus trichocarpa]
gene-POPTR_002G049700	STY13	11.7242	12.4285	12.4881	23.6341	26.8168	24.122	7.35202e-58	1.07613	up	--		Molecular Function: protein kinase activity (GO:0004672);; Molecular Function: protein serine/threonine kinase activity (GO:0004674);; Molecular Function: ATP binding (GO:0005524);; Cellular Component: plasma membrane (GO:0005886);;	K01968|3.1e-186|tcc:18613295|K01968 3-methylcrotonyl-CoA carboxylase alpha subunit [EC:6.4.1.4] | (RefSeq) methylcrotonoyl-CoA carboxylase subunit alpha, mitochondrial	Valine, leucine and isoleucine degradation (ko00280)	[T]	Signal transduction mechanisms	Protein tyrosine and serine/threonine kinase	Serine/threonine-protein kinase STY13 OS=Arabidopsis thaliana OX=3702 GN=STY13 PE=1 SV=2	T	Signal transduction mechanisms	serine/threonine-protein kinase STY13 isoform X1 [Populus trichocarpa]
gene-POPTR_005G246600	MSL8	7.87162	7.62903	8.09821	28.6025	29.3008	27.4878	6.92171e-213	1.90552	up	--	--	Cellular Component: plasma membrane (GO:0005886);; Biological Process: anion transport (GO:0006820);; Molecular Function: mechanically-gated ion channel activity (GO:0008381);; Cellular Component: integral component of membrane (GO:0016021);;	K22048|4.6e-209|hbr:110661026|K22048 mechanosensitive ion channel protein 4/5/6/7/8/9/10 | (RefSeq) mechanosensitive ion channel protein 5-like	--	[M]	Cell wall/membrane/envelope biogenesis	Mechanosensitive ion channel	Mechanosensitive ion channel protein 8 OS=Arabidopsis thaliana OX=3702 GN=MSL8 PE=2 SV=2	M	Cell wall/membrane/envelope biogenesis	hypothetical protein POPTR_005G246600 [Populus trichocarpa]
gene-POPTR_007G043850	--	5.70148	5.99686	3.7757	12.696	15.7135	12.4964	1.73733e-05	1.39015	up	--	--	--	--	--	--	--	--	--	--	--	hypothetical protein POPTR_007G043850 [Populus trichocarpa]
gene-POPTR_011G131800	HSP21.7	2.70782	2.51602	2.77523	9.91627	9.73827	10.1944	3.80934e-33	1.92752	up	--	--	--	K13993|9.8e-11|mus:103996584|K13993 HSP20 family protein | (RefSeq) 16.9 kDa class I heat shock protein 2-like	Protein processing in endoplasmic reticulum (ko04141)	--	--	Hsp20/alpha crystallin family	21.7 kDa class VI heat shock protein OS=Arabidopsis thaliana OX=3702 GN=HSP21.7 PE=2 SV=1	S	Function unknown	21.7 kDa class VI heat shock protein [Populus trichocarpa]
gene-POPTR_003G199400	RPPL1	0.449363	0.631329	0.651985	1.2381	1.14094	1.28542	2.19882e-09	1.11566	up	[R]	General function prediction only	Biological Process: signal transduction (GO:0007165);; Molecular Function: ADP binding (GO:0043531);;	K12818|2.6e-147|mtr:MTR_0267s0070|K12818 ATP-dependent RNA helicase DHX8/PRP22 [EC:3.6.4.13] | (RefSeq) NB-ARC domain disease resistance protein, putative	Spliceosome (ko03040)	[T]	Signal transduction mechanisms	NB-ARC domain	Putative disease resistance RPP13-like protein 1 OS=Arabidopsis thaliana OX=3702 GN=RPPL1 PE=3 SV=1	T	Signal transduction mechanisms	putative disease resistance RPP13-like protein 1 [Populus trichocarpa]
gene-POPTR_008G113400	BZIP43	4.21274	4.76985	4.30659	23.8514	23.1783	22.4134	1.66208e-92	2.42323	up	--	--	Molecular Function: transcription factor activity, sequence-specific DNA binding (GO:0003700);;	K09060|6.5e-07|gmx:778122|K09060 plant G-box-binding factor | (RefSeq) BZIP86; putative bZIP domain class transcription factor	--	--	--	bZIP transcription factor	Basic leucine zipper 43 OS=Arabidopsis thaliana OX=3702 GN=BZIP43 PE=1 SV=1	K	Transcription	basic leucine zipper 43 [Populus trichocarpa]
gene-POPTR_004G184700	--	5.25906	4.97314	4.95318	15.5689	18.0007	14.6061	4.00536e-53	1.70786	up	--	--	--	--	--	--	--	PDDEXK-like family of unknown function	--	S	Function unknown	uncharacterized protein LOC7470449 [Populus trichocarpa]
gene-POPTR_002G226500	AVT6A	4.99731	5.75056	6.20528	25.683	23.5948	21.8448	4.35136e-37	2.09351	up	--	--	--	K14207|1.4e-31|pop:18097651|K14207 solute carrier family 38 (sodium-coupled neutral amino acid transporter), member 2 | (RefSeq) amino acid transporter AVT6A	--	[E]	Amino acid transport and metabolism	--	Amino acid transporter AVT6A OS=Arabidopsis thaliana OX=3702 GN=AVT6A PE=2 SV=1	E	Amino acid transport and metabolism	hypothetical protein POPTR_002G226500 [Populus trichocarpa]
gene-POPTR_010G131900	ABCG21	4.83374	5.52494	4.83728	10.9915	10.7973	11.6525	1.81467e-39	1.18244	up	[V]	Defense mechanisms	Molecular Function: ATP binding (GO:0005524);; Cellular Component: plasma membrane (GO:0005886);; Cellular Component: integral component of membrane (GO:0016021);; Molecular Function: ATPase activity (GO:0016887);; Molecular Function: ATPase activity, coupled to transmembrane movement of substances (GO:0042626);; Biological Process: transmembrane transport (GO:0055085);;	K05681|5.2e-197|nau:109228191|K05681 ATP-binding cassette, subfamily G (WHITE), member 2 | (RefSeq) ABC transporter G family member 9-like	ABC transporters (ko02010)	[Q]	Secondary metabolites biosynthesis, transport and catabolism	ABC-2 type transporter	ABC transporter G family member 21 OS=Arabidopsis thaliana OX=3702 GN=ABCG21 PE=2 SV=2	Q	Secondary metabolites biosynthesis, transport and catabolism	ABC transporter G family member 21 isoform X1 [Populus trichocarpa]
gene-POPTR_008G069900	ESK1	5.83069	5.08096	5.87515	12.6187	13.4655	12.396	1.50645e-47	1.24596	up	--	--	Cellular Component: Golgi apparatus (GO:0005794);; Cellular Component: integral component of membrane (GO:0016021);; Molecular Function: O-acetyltransferase activity (GO:0016413);; Biological Process: response to freezing (GO:0050826);;	K23877|1.5e-41|soe:110782899|K23877 xyloglucan O-acetyltransferase | (RefSeq) protein ALTERED XYLOGLUCAN 4 isoform X1	--	--	--	GDSL/SGNH-like Acyl-Esterase family found in Pmr5 and Cas1p	Protein ESKIMO 1 OS=Arabidopsis thaliana OX=3702 GN=ESK1 PE=1 SV=1	S	Function unknown	protein ESKIMO 1 [Populus trichocarpa]
gene-POPTR_005G211000	--	0.579549	0.234212	0.477092	5.75535	6.04716	5.04572	3.52017e-45	3.63847	up	--	--	--	--	--	--	--	--	--	--	--	hypothetical protein POPTR_005G211000 [Populus trichocarpa]
gene-POPTR_007G113400	--	1.55707	1.28735	1.51994	2.37878	3.35346	2.89905	3.54268e-05	1.00515	up	--	--	--	--	--	--	--	--	--	--	--	hypothetical protein POPTR_007G113400 [Populus trichocarpa]
gene-POPTR_008G159100	ACA13	0.191884	0.213422	0.181808	0.5341	0.461095	0.367508	0.000234632	1.19887	up	[P]	Inorganic ion transport and metabolism	Molecular Function: calcium-transporting ATPase activity (GO:0005388);; Molecular Function: ATP binding (GO:0005524);; Cellular Component: integral component of membrane (GO:0016021);; Molecular Function: cation-transporting ATPase activity (GO:0019829);; Cellular Component: intracellular membrane-bounded organelle (GO:0043231);;	K01537|0.0e+00|pop:7467513|K01537 P-type Ca2+ transporter type 2C [EC:7.2.2.10] | (RefSeq) putative calcium-transporting ATPase 13, plasma membrane-type	--	[P]	Inorganic ion transport and metabolism	Cation transporting ATPase, C-terminus	Putative calcium-transporting ATPase 13, plasma membrane-type OS=Arabidopsis thaliana OX=3702 GN=ACA13 PE=3 SV=1	P	Inorganic ion transport and metabolism	Haloacid dehalogenase-like hydrolase family protein [Populus tomentosa]
gene-POPTR_004G095100	At1g66810	0.407942	0.377012	0.285632	1.8987	1.88094	1.67297	7.42138e-21	2.3225	up	--	--	Molecular Function: metal ion binding (GO:0046872);;	K18753|3.2e-160|pop:7456843|K18753 butyrate response factor | (RefSeq) zinc finger CCCH domain-containing protein 14 isoform X1	--	[R]	General function prediction only	Zinc finger C-x8-C-x5-C-x3-H type (and similar)	Zinc finger CCCH domain-containing protein 14 OS=Arabidopsis thaliana OX=3702 GN=At1g66810 PE=2 SV=1	S	Function unknown	zinc finger CCCH domain-containing protein 14 isoform X4 [Populus trichocarpa]
gene-POPTR_005G114500	--	0.694046	0.329903	0.491763	2.39662	2.13575	2.99172	8.77094e-10	2.2003	up	--	--	--	--	--	--	--	--	--	--	--	hypothetical protein POPTR_005G114500 [Populus trichocarpa]
gene-POPTR_T023900	At4g27290	5.96072	4.2222	6.19694	12.1062	9.9293	10.6711	1.32936e-10	1.04083	up	--	--	--	--	--	--	--	D-mannose binding lectin	G-type lectin S-receptor-like serine/threonine-protein kinase At4g27290 OS=Arabidopsis thaliana OX=3702 GN=At4g27290 PE=3 SV=4	T	Signal transduction mechanisms	hypothetical protein POPTR_T023900 [Populus trichocarpa]
gene-POPTR_007G048500	--	4.37135	3.60409	4.85749	8.1842	9.37244	8.15781	5.91739e-15	1.04857	up	--	--	Biological Process: telomere maintenance (GO:0000723);; Molecular Function: DNA helicase activity (GO:0003678);; Molecular Function: ATP binding (GO:0005524);; Biological Process: DNA repair (GO:0006281);; Biological Process: DNA recombination (GO:0006310);;	K07466|1.0e-81|pop:112326066|K07466 replication factor A1 | (RefSeq) uncharacterized protein LOC112326066	DNA replication (ko03030);; Nucleotide excision repair (ko03420);; Mismatch repair (ko03430);; Homologous recombination (ko03440)	[D]	Cell cycle control, cell division, chromosome partitioning	PIF1-like helicase	--	L	Replication, recombination and repair	hypothetical protein POPTR_007G048500 [Populus trichocarpa]
gene-POPTR_003G134500	CYC2	96.2077	87.6779	92.851	276.122	277.861	273.4	3.58105e-280	1.6317	up	[M]	Cell wall/membrane/envelope biogenesis	Molecular Function: catalytic activity (GO:0003824);;	K22419|4.8e-232|pop:7497815|K22419 Delta4-3-oxosteroid 5beta-reductase [EC:1.3.1.3] | (RefSeq) 3-oxo-Delta(4,5)-steroid 5-beta-reductase	--	--	--	NAD dependent epimerase/dehydratase family	(S)-8-oxocitronellyl enol synthase CYC2 OS=Camptotheca acuminata OX=16922 GN=CYC2 PE=1 SV=1	S	Function unknown	3-oxo-Delta(4,5)-steroid 5-beta-reductase [Populus trichocarpa]
gene-POPTR_T060100	DJ1D	0.261991	0.271926	0.18364	0.692413	0.735887	1.04641	4.46882e-09	1.73603	up	[R]	General function prediction only	Molecular Function: molecular_function (GO:0003674);; Molecular Function: catalytic activity (GO:0003824);; Biological Process: cellular aldehyde metabolic process (GO:0006081);; Biological Process: organic acid metabolic process (GO:0006082);; Biological Process: lactate metabolic process (GO:0006089);; Biological Process: biological_process (GO:0008150);; Biological Process: metabolic process (…	K18881|3.2e-223|pop:18106498|K18881 D-lactate dehydratase [EC:4.2.1.130] | (RefSeq) protein DJ-1 homolog D	Pyruvate metabolism (ko00620)	[RV]	General function prediction only;; Defense mechanisms	DJ-1/PfpI family	Protein DJ-1 homolog D OS=Arabidopsis thaliana OX=3702 GN=DJ1D PE=1 SV=1	V	Defense mechanisms	hypothetical protein POPTR_T060100 [Populus trichocarpa]
gene-POPTR_017G118700	--	0	0.119902	0	2.33358	2.31364	1.9362	7.07349e-14	4.45451	up	--	--	Biological Process: lipid transport (GO:0006869);;	--	--	--	--	Probable lipid transfer	Non-specific lipid-transfer protein 2 OS=Prunus armeniaca OX=36596 PE=1 SV=1	S	Function unknown	non-specific lipid-transfer protein 2 [Populus trichocarpa]
gene-POPTR_003G070500	At1g54070	2.45294	2.88432	3.13528	8.97781	8.50965	7.10538	5.15692e-28	1.57765	up	--	--	--	--	--	--	--	Dormancy/auxin associated protein	Dormancy-associated protein homolog 4 OS=Arabidopsis thaliana OX=3702 GN=At1g54070 PE=3 SV=1	S	Function unknown	dormancy-associated protein homolog 4 isoform X1 [Populus trichocarpa]
gene-POPTR_012G116000	At5g45160	10.3631	11.084	11.1098	24.7387	25.4631	24.0012	1.04651e-64	1.23865	up	--	--	Cellular Component: integral component of membrane (GO:0016021);;	K22698|4.6e-281|pop:18103862|K22698 protein SEY1 [EC:3.6.5.-] | (RefSeq) protein ROOT HAIR DEFECTIVE 3 homolog 2	--	[R]	General function prediction only	Root hair defective 3 GTP-binding protein (RHD3)	Protein ROOT HAIR DEFECTIVE 3 homolog 2 OS=Arabidopsis thaliana OX=3702 GN=At5g45160 PE=2 SV=1	L	Replication, recombination and repair	hypothetical protein POPTR_012G116000 [Populus trichocarpa]
gene-POPTR_017G016900	ATHB-52	3.82623	2.93743	4.03004	21.2833	20.8092	21.0389	1.95256e-64	2.57716	up	--	--	Cellular Component: nucleus (GO:0005634);; Molecular Function: sequence-specific DNA binding (GO:0043565);; Biological Process: positive regulation of transcription, DNA-templated (GO:0045893);;	K22756|5.4e-21|nto:104088813|K22756 E3 SUMO-protein ligase NSE2 [EC:2.3.2.-] | (RefSeq) E3 SUMO-protein ligase MMS21 isoform X1	--	[K]	Transcription	Homeodomain	Homeobox-leucine zipper protein ATHB-52 OS=Arabidopsis thaliana OX=3702 GN=ATHB-52 PE=2 SV=1	K	Transcription	homeobox-leucine zipper protein ATHB-52 [Populus trichocarpa]
gene-POPTR_004G046100	DOF5.6	6.07335	6.44057	7.36354	33.544	34.6458	33.2428	9.56757e-231	2.39928	up	--	--	Molecular Function: DNA binding (GO:0003677);; Cellular Component: nucleus (GO:0005634);; Biological Process: regulation of transcription, DNA-templated (GO:0006355);;	K20043|2.8e-23|aip:107640400|K20043 clathrin coat assembly protein AP180 | (RefSeq) putative clathrin assembly protein At5g35200	--	--	--	Dof domain, zinc finger	Dof zinc finger protein DOF5.6 OS=Arabidopsis thaliana OX=3702 GN=DOF5.6 PE=2 SV=2	K	Transcription	dof zinc finger protein DOF1.4 [Populus trichocarpa]
gene-POPTR_005G072400	--	0.285787	0.182124	0.311523	0.871461	0.725117	0.587252	5.33104e-05	1.46708	up	--	--	Biological Process: reciprocal meiotic recombination (GO:0007131);;	--	--	--	--	--	--	S	Function unknown	uncharacterized protein LOC7455190 [Populus trichocarpa]
gene-POPTR_003G185000	--	12.5874	12.3962	11.9283	30.2225	32.2934	34.8695	1.71605e-88	1.44847	up	--	--	--	--	--	--	--	--	--	--	--	uncharacterized protein LOC7493243 [Populus trichocarpa]
gene-POPTR_001G013400	NPF7.1	3.8471	3.8377	4.39696	134.769	119.7	119.427	0	4.99545	up	[E]	Amino acid transport and metabolism	Cellular Component: integral component of membrane (GO:0016021);; Molecular Function: transmembrane transporter activity (GO:0022857);;	K14638|2.0e-245|gmx:100777732|K14638 solute carrier family 15 (peptide/histidine transporter), member 3/4 | (RefSeq) protein NRT1/ PTR FAMILY 7.1	--	[E]	Amino acid transport and metabolism	POT family	Protein NRT1/ PTR FAMILY 7.1 OS=Arabidopsis thaliana OX=3702 GN=NPF7.1 PE=2 SV=1	E	Amino acid transport and metabolism	protein NRT1/ PTR FAMILY 7.1 [Populus trichocarpa]
gene-POPTR_007G047200	--	15.19	13.887	15.5006	55.6617	55.5787	51.4248	3.40566e-198	1.91738	up	--	--	Molecular Function: nutrient reservoir activity (GO:0045735);;	--	--	--	--	Cupin	11S globulin seed storage protein Ana o 2.0101 (Fragment) OS=Anacardium occidentale OX=171929 PE=1 SV=1	S	Function unknown	glutelin type-D 1 [Populus trichocarpa]
gene-POPTR_001G173900	--	9.50729	9.3933	10.5115	23.0298	24.483	26.261	2.96601e-63	1.37625	up	--	--	--	--	--	--	--	Agenet domain	--	S	Function unknown	uncharacterized protein LOC7490968 isoform X1 [Populus trichocarpa]
gene-POPTR_T013900	At4g27220	0.121448	0.116584	0.094393	0.234351	0.254491	0.28179	0.00211554	1.17426	up	[R]	General function prediction only	Molecular Function: DNA binding (GO:0003677);; Molecular Function: ADP binding (GO:0043531);;	K13459|0.0e+00|pop:112325460|K13459 disease resistance protein RPS2 | (RefSeq) probable disease resistance protein At4g27220	Plant-pathogen interaction (ko04626)	[T]	Signal transduction mechanisms	NB-ARC domain	Probable disease resistance protein At4g27220 OS=Arabidopsis thaliana OX=3702 GN=At4g27220 PE=2 SV=1	T	Signal transduction mechanisms	hypothetical protein POPTR_T013900 [Populus trichocarpa]
gene-POPTR_004G029100	BHLH112	5.08761	6.50697	6.15974	16.8247	15.7238	16.2043	4.79481e-58	1.49388	up	--	--	Molecular Function: protein dimerization activity (GO:0046983);;	--	--	--	--	--	Transcription factor bHLH112 OS=Arabidopsis thaliana OX=3702 GN=BHLH112 PE=1 SV=1	K	Transcription	hypothetical protein POPTR_004G029100 [Populus trichocarpa]
gene-POPTR_018G081700	ATC401	4.23827	4.13476	4.19127	19.2083	19.3978	18.9075	3.4756e-223	2.20784	up	--	--	Molecular Function: molecular_function (GO:0003674);; Molecular Function: nucleic acid binding (GO:0003676);; Molecular Function: RNA binding (GO:0003723);; Molecular Function: catalytic activity (GO:0003824);; Molecular Function: nuclease activity (GO:0004518);; Molecular Function: endonuclease activity (GO:0004519);; Molecular Function: binding (GO:0005488);; Cellular Component: cellular_compon…	K17710|4.2e-72|pop:7476286|K17710 pentatricopeptide repeat domain-containing protein 1 | (RefSeq) pentatricopeptide repeat-containing protein At5g21222 isoform X1	--	[R]	General function prediction only	PPR repeat family	Pentatricopeptide repeat-containing protein At5g21222 OS=Arabidopsis thaliana OX=3702 GN=ATC401 PE=2 SV=1	S	Function unknown	pentatricopeptide repeat-containing protein At5g21222 isoform X1 [Populus trichocarpa]
gene-POPTR_T063200	P85	6.77557	6.52051	7.07742	20.8504	21.0601	20.8981	1.70058e-90	1.67258	up	--	--	Cellular Component: plasma membrane (GO:0005886);;	K19366|1.3e-50|smo:SELMODRAFT_64393|K19366 spartin | (RefSeq) hypothetical protein	Endocytosis (ko04144)	--	--	Senescence-associated protein	Senescence/dehydration-associated protein At4g35985, chloroplastic OS=Arabidopsis thaliana OX=3702 GN=P85 PE=2 SV=1	S	Function unknown	senescence/dehydration-associated protein At4g35985, chloroplastic [Populus trichocarpa]
gene-POPTR_017G126500	ALE2	18.5295	16.2612	18.9462	55.3083	53.7342	51.4098	2.26641e-154	1.62929	up	[T]	Signal transduction mechanisms	Molecular Function: transmembrane receptor protein serine/threonine kinase activity (GO:0004675);; Molecular Function: ATP binding (GO:0005524);; Cellular Component: plasma membrane (GO:0005886);; Biological Process: protein phosphorylation (GO:0006468);;	K01180|6.2e-57|cmax:111487562|K01180 endo-1,3(4)-beta-glucanase [EC:3.2.1.6] | (RefSeq) uncharacterized protein LOC111487562	--	[T]	Signal transduction mechanisms	Protein kinase domain	Receptor-like serine/threonine-protein kinase ALE2 OS=Arabidopsis thaliana OX=3702 GN=ALE2 PE=1 SV=1	T	Signal transduction mechanisms	probable serine/threonine-protein kinase PBL7 [Populus trichocarpa]
gene-POPTR_001G032500	At5g07050	10.1305	10.2252	12.7683	68.122	66.5898	66.3194	9.53695e-285	2.65135	up	--	--	Cellular Component: plasma membrane (GO:0005886);; Cellular Component: integral component of membrane (GO:0016021);; Molecular Function: transmembrane transporter activity (GO:0022857);;	K17500|1.2e-55|nto:104085001|K17500 integrin-linked kinase-associated serine/threonine phosphatase 2C [EC:3.1.3.16] | (RefSeq) WAT1-related protein At3g18200 isoform X1	--	--	--	EamA-like transporter family	WAT1-related protein At5g07050 OS=Arabidopsis thaliana OX=3702 GN=At5g07050 PE=2 SV=1	S	Function unknown	WAT1-related protein At5g07050 [Populus trichocarpa]
gene-POPTR_002G250000	--	2.17586	1.65151	1.39981	13.8748	13.17	13.9945	7.33615e-76	2.98111	up	[V]	Defense mechanisms	Molecular Function: magnesium ion binding (GO:0000287);; Cellular Component: cytosol (GO:0005829);; Biological Process: dCTP catabolic process (GO:0006253);; Biological Process: DNA protection (GO:0042262);; Molecular Function: dCTP diphosphatase activity (GO:0047840);;	K16904|4.6e-64|pop:7459513|K16904 dCTP diphosphatase [EC:3.6.1.12] | (RefSeq) dCTP pyrophosphatase 1	Pyrimidine metabolism (ko00240)	--	--	MazG nucleotide pyrophosphohydrolase domain	--	S	Function unknown	dCTP pyrophosphatase 1 [Populus trichocarpa]
gene-POPTR_004G094100	--	1.53525	1.5371	2.00646	5.52235	5.60682	4.85915	1.3818e-30	1.69502	up	[O]	Posttranslational modification, protein turnover, chaperones	Molecular Function: protein binding (GO:0005515);;	K08770|8.2e-59|egr:104435738|K08770 ubiquitin C | (RefSeq) polyubiquitin 4	Ubiquitin mediated proteolysis (ko04120)	--	--	Ubiquitin family	--	O	Posttranslational modification, protein turnover, chaperones	hypothetical protein POPTR_004G094100 [Populus trichocarpa]
gene-POPTR_004G161500	GATA5	12.6515	12.0556	14.4145	31.5828	31.6895	30.338	1.47507e-74	1.31086	up	--	--	Cellular Component: nucleus (GO:0005634);; Molecular Function: zinc ion binding (GO:0008270);; Biological Process: cell differentiation (GO:0030154);; Molecular Function: sequence-specific DNA binding (GO:0043565);; Biological Process: positive regulation of transcription, DNA-templated (GO:0045893);;	K21630|1.4e-38|cpep:111804029|K21630 GATA-type zinc finger protein 1 | (RefSeq) GATA transcription factor 5-like isoform X1	--	[K]	Transcription	GATA zinc finger	GATA transcription factor 5 OS=Arabidopsis thaliana OX=3702 GN=GATA5 PE=2 SV=1	K	Transcription	GATA transcription factor 5 [Populus trichocarpa]
gene-POPTR_005G239000	GASA11	0.811356	0.472891	0.308843	0.943233	1.09753	1.39595	0.00581185	1.08243	up	--	--	--	K03860|5.3e-10|nnu:104608881|K03860 phosphatidylinositol N-acetylglucosaminyltransferase subunit Q | (RefSeq) N-acetylglucosaminyl-phosphatidylinositol biosynthetic protein gpi1-like	Glycosylphosphatidylinositol (GPI)-anchor biosynthesis (ko00563)	--	--	Gibberellin regulated protein	Gibberellin-regulated protein 11 OS=Arabidopsis thaliana OX=3702 GN=GASA11 PE=3 SV=1	S	Function unknown	gibberellin-regulated protein 11 [Populus trichocarpa]
gene-POPTR_004G044000	--	11.9149	9.05121	10.4316	43.8396	44.9356	48.6072	1.2759e-121	2.17439	up	--	--	Cellular Component: integral component of membrane (GO:0016021);;	--	--	--	--	--	--	--	--	uncharacterized protein LOC7456792 [Populus trichocarpa]
gene-POPTR_015G092300	4CLL9	0.649502	0.48168	0.561677	3.04128	3.10267	3.07897	8.75075e-34	2.44741	up	[IQ]	Lipid transport and metabolism;; Secondary metabolites biosynthesis, transport and catabolism	Molecular Function: CoA-ligase activity (GO:0016405);;	K01904|1.2e-276|pop:7454535|K01904 4-coumarate--CoA ligase [EC:6.2.1.12] | (RefSeq) 4-coumarate--CoA ligase-like 9	Ubiquinone and other terpenoid-quinone biosynthesis (ko00130);; Phenylpropanoid biosynthesis (ko00940)	[I]	Lipid transport and metabolism	AMP-binding enzyme	4-coumarate--CoA ligase-like 9 OS=Arabidopsis thaliana OX=3702 GN=4CLL9 PE=1 SV=2	I	Lipid transport and metabolism	4-coumarate--CoA ligase-like 9 [Populus trichocarpa]
gene-POPTR_010G037200	HS1	1.34683	2.05587	1.23606	2.9829	4.44113	4.06056	5.99492e-08	1.32506	up	[E]	Amino acid transport and metabolism	--	--	--	--	--	Stress responsive A/B Barrel Domain	Stress-response A/B barrel domain-containing protein HS1 OS=Arabidopsis thaliana OX=3702 GN=HS1 PE=1 SV=1	S	Function unknown	stress-response A/B barrel domain-containing protein HS1 isoform X1 [Populus trichocarpa]
gene-POPTR_017G055900	PAP15	1.03778	0.914062	1.49479	3.09202	2.99862	3.62147	1.5854e-17	1.53644	up	[T]	Signal transduction mechanisms	Molecular Function: acid phosphatase activity (GO:0003993);; Molecular Function: metal ion binding (GO:0046872);;	K22390|0.0e+00|pop:7496630|K22390 acid phosphatase type 7 | (RefSeq) purple acid phosphatase 15 isoform X1	--	[G]	Carbohydrate transport and metabolism	Calcineurin-like phosphoesterase	Purple acid phosphatase 15 OS=Arabidopsis thaliana OX=3702 GN=PAP15 PE=1 SV=1	G	Carbohydrate transport and metabolism	purple acid phosphatase 15 isoform X4 [Populus trichocarpa]
gene-POPTR_002G221600	WRKY1	0.635665	0.665448	0.711846	1.82637	1.7317	1.15746	1.21742e-07	1.24738	up	--	--	Molecular Function: transcription factor activity, sequence-specific DNA binding (GO:0003700);; Cellular Component: nucleus (GO:0005634);; Molecular Function: sequence-specific DNA binding (GO:0043565);;	K18834|8.7e-167|pop:18105351|K18834 WRKY transcription factor 1 | (RefSeq) WRKY transcription factor 1	Plant-pathogen interaction (ko04626)	--	--	WRKY DNA -binding domain	WRKY transcription factor 1 OS=Arabidopsis thaliana OX=3702 GN=WRKY1 PE=1 SV=1	K	Transcription	hypothetical protein POPTR_002G221600 [Populus trichocarpa]
gene-POPTR_004G069000	--	1.12277	1.00427	0.563121	2.33664	1.9284	2.71179	9.8841e-05	1.35668	up	--	--	--	--	--	--	--	--	--	--	--	unknown [Populus trichocarpa]
gene-POPTR_013G135100	--	3.07229	2.73827	2.95103	11.1471	9.29209	9.08557	1.05005e-43	1.79025	up	[HR]	Coenzyme transport and metabolism;; General function prediction only	Molecular Function: hydrolase activity (GO:0016787);;	K08726|2.2e-54|han:110941524|K08726 soluble epoxide hydrolase / lipid-phosphate phosphatase [EC:3.3.2.10 3.1.3.76] | (RefSeq) uncharacterized protein LOC110941524	Arachidonic acid metabolism (ko00590);; Peroxisome (ko04146)	[I]	Lipid transport and metabolism	alpha/beta hydrolase fold	--	I	Lipid transport and metabolism	bifunctional epoxide hydrolase 2 [Populus trichocarpa]
gene-POPTR_005G257200	AHL27	1.1361	0.721231	1.4002	3.18614	3.71962	3.63815	1.57417e-14	1.67907	up	--	--	Molecular Function: AT DNA binding (GO:0003680);; Molecular Function: transcription factor activity, sequence-specific DNA binding (GO:0003700);; Cellular Component: nucleus (GO:0005634);; Biological Process: vegetative to reproductive phase transition of meristem (GO:0010228);;	--	--	--	--	Plants and Prokaryotes Conserved (PCC) domain	AT-hook motif nuclear-localized protein 27 OS=Arabidopsis thaliana OX=3702 GN=AHL27 PE=1 SV=1	K	Transcription	AT-hook motif nuclear-localized protein 25 [Populus trichocarpa]
gene-POPTR_016G117300	GT-3B	1.21551	0.841227	0.801343	2.26641	1.89699	2.58926	1.07034e-06	1.24756	up	--	--	Molecular Function: transcription factor activity, sequence-specific DNA binding (GO:0003700);; Cellular Component: nucleus (GO:0005634);; Molecular Function: sequence-specific DNA binding (GO:0043565);;	--	--	[K]	Transcription	Myb/SANT-like DNA-binding domain	Trihelix transcription factor GT-3b OS=Arabidopsis thaliana OX=3702 GN=GT-3B PE=1 SV=1	K	Transcription	trihelix transcription factor GT-3b [Populus trichocarpa]
gene-POPTR_007G138001	At4g28420	0.709773	0.583569	0.585639	1.43753	1.46673	1.60736	2.13509e-06	1.26933	up	--	--	Molecular Function: catalytic activity (GO:0003824);; Biological Process: biosynthetic process (GO:0009058);; Molecular Function: pyridoxal phosphate binding (GO:0030170);;	K00815|3.3e-47|pop:7459961|K00815 tyrosine aminotransferase [EC:2.6.1.5] | (RefSeq) probable aminotransferase TAT2	Ubiquinone and other terpenoid-quinone biosynthesis (ko00130);; Cysteine and methionine metabolism (ko00270);; Tyrosine metabolism (ko00350);; Phenylalanine metabolism (ko00360);; Phenylalanine, tyrosine and tryptophan biosynthesis (ko00400);; Isoquinoline alkaloid biosynthesis (ko00950);; Tropane, piperidine and pyridine alkaloid biosynthesis (ko00960)	[E]	Amino acid transport and metabolism	Aminotransferase class I and II	Probable aminotransferase TAT1 OS=Arabidopsis thaliana OX=3702 GN=At4g28420 PE=2 SV=1	E	Amino acid transport and metabolism	hypothetical protein POPTR_007G138001 [Populus trichocarpa]
gene-POPTR_002G098800	PHI-1	0.195275	0.436984	0.320996	1.80303	1.88719	2.22742	4.48918e-16	2.55228	up	--	--	--	K00020|1.2e-24|mtr:MTR_8g088900|K00020 3-hydroxyisobutyrate dehydrogenase [EC:1.1.1.31] | (RefSeq) 6-phosphogluconate dehydrogenase-like protein	Valine, leucine and isoleucine degradation (ko00280)	--	--	Phosphate-induced protein 1 conserved region	Protein PHOSPHATE-INDUCED 1 OS=Nicotiana tabacum OX=4097 GN=PHI-1 PE=2 SV=1	L	Replication, recombination and repair	hypothetical protein POPTR_002G098800 [Populus trichocarpa]
gene-POPTR_017G150000	UGT88A1	15.5739	15.7095	16.9023	83.7831	79.528	74.7429	0	2.35488	up	--	--	Molecular Function: UDP-glycosyltransferase activity (GO:0008194);; Cellular Component: intracellular membrane-bounded organelle (GO:0043231);;	K22845|4.8e-173|pavi:110767602|K22845 phlorizin synthase [EC:2.4.1.357] | (RefSeq) UDP-glycosyltransferase 88A1-like	Flavonoid biosynthesis (ko00941)	[GC]	Carbohydrate transport and metabolism;; Energy production and conversion	UDP-glucoronosyl and UDP-glucosyl transferase	UDP-glycosyltransferase 88A1 OS=Arabidopsis thaliana OX=3702 GN=UGT88A1 PE=2 SV=1	--	--	UDP-glycosyltransferase 88A1 [Populus trichocarpa]
gene-POPTR_012G014900	--	0.677409	0.607663	0.510988	2.80955	2.33044	2.60806	2.09725e-33	2.12977	up	[E]	Amino acid transport and metabolism	Molecular Function: serine-type peptidase activity (GO:0008236);;	K01278|0.0e+00|pop:7464266|K01278 dipeptidyl-peptidase 4 [EC:3.4.14.5] | (RefSeq) uncharacterized protein LOC7464266 isoform X1	--	[O]	Posttranslational modification, protein turnover, chaperones	Dipeptidyl peptidase IV (DPP IV) N-terminal region	--	O	Posttranslational modification, protein turnover, chaperones	uncharacterized protein LOC7464266 isoform X2 [Populus trichocarpa]
gene-POPTR_010G059550	At1g60420	33.1487	33.6146	37.7139	199.397	192.082	194.182	0	2.53842	up	[O]	Posttranslational modification, protein turnover, chaperones	Biological Process: cell redox homeostasis (GO:0045454);;	K17609|0.0e+00|pop:7477026|K17609 nucleoredoxin [EC:1.8.1.8] | (RefSeq) probable nucleoredoxin 1	--	[R]	General function prediction only	Thioredoxin-like	Probable nucleoredoxin 1 OS=Arabidopsis thaliana OX=3702 GN=At1g60420 PE=1 SV=1	O	Posttranslational modification, protein turnover, chaperones	probable nucleoredoxin 1 [Populus trichocarpa]
gene-POPTR_019G128650	--	0.257968	0.176468	0.093244	4.06344	3.47368	4.96501	1.02945e-27	4.24362	up	--	--	--	--	--	--	--	--	--	--	--	hypothetical protein POPTR_019G128650 [Populus trichocarpa]
gene-POPTR_001G423700	PAP18	8.03648	8.17797	8.54747	16.9454	16.5132	16.5345	4.0485e-44	1.06396	up	[T]	Signal transduction mechanisms	Molecular Function: acid phosphatase activity (GO:0003993);; Molecular Function: metal ion binding (GO:0046872);;	K22390|7.4e-266|pop:18095967|K22390 acid phosphatase type 7 | (RefSeq) purple acid phosphatase 18	--	[G]	Carbohydrate transport and metabolism	Iron/zinc purple acid phosphatase-like protein C	Purple acid phosphatase 18 OS=Arabidopsis thaliana OX=3702 GN=PAP18 PE=2 SV=1	G	Carbohydrate transport and metabolism	purple acid phosphatase 18 [Populus trichocarpa]
gene-POPTR_002G097800	--	0.484252	0.359571	0.664228	1.13801	1.38718	1.24906	1.69518e-08	1.3517	up	--	--	Cellular Component: cytoplasm (GO:0005737);; Molecular Function: protein kinase binding (GO:0019901);;	--	--	[T]	Signal transduction mechanisms	Leucine Rich repeats (2 copies)	--	T	Signal transduction mechanisms	uncharacterized protein LOC7461781 [Populus trichocarpa]
gene-POPTR_001G149400	--	11.9849	11.473	12.2012	28.0986	28.1462	28.4006	1.19591e-103	1.29839	up	--	--	Cellular Component: integral component of membrane (GO:0016021);;	--	--	[R]	General function prediction only	MORN repeat	--	J	Translation, ribosomal structure and biogenesis	uncharacterized protein LOC18096768 [Populus trichocarpa]
gene-POPTR_002G147100	--	0.53961	0.894301	0.471912	6.62662	5.13979	6.31742	7.04211e-38	3.20126	up	--	--	--	--	--	--	--	Protein of unknown function (DUF1442)	--	S	Function unknown	uncharacterized protein LOC7453969 [Populus trichocarpa]
gene-POPTR_015G094700	KING1	53.8765	50.7505	54.2554	111.137	107.576	105.135	4.86344e-123	1.07968	up	[T]	Signal transduction mechanisms	Biological Process: regulation of protein phosphorylation (GO:0001932);; Molecular Function: molecular_function (GO:0003674);; Cellular Component: cellular_component (GO:0005575);; Cellular Component: cell wall (GO:0005618);; Cellular Component: cell (GO:0005623);; Biological Process: biological_process (GO:0008150);; Cellular Component: plant-type cell wall (GO:0009505);; Molecular Function: kin…	--	--	[C]	Energy production and conversion	CBS domain	SNF1-related protein kinase regulatory subunit gamma-1 OS=Arabidopsis thaliana OX=3702 GN=KING1 PE=1 SV=2	C	Energy production and conversion	SNF1-related protein kinase regulatory subunit gamma-1 [Populus trichocarpa]
gene-POPTR_010G191300	HSPRO2	10.1473	9.37916	11.1798	34.9287	38.5909	36.6734	2.08642e-164	1.89374	up	--	--	Biological Process: defense response (GO:0006952);; Biological Process: tryptophan catabolic process to kynurenine (GO:0019441);; Molecular Function: heme binding (GO:0020037);; Molecular Function: metal ion binding (GO:0046872);;	--	--	--	--	Hs1pro-1 protein C-terminus	Nematode resistance protein-like HSPRO2 OS=Arabidopsis thaliana OX=3702 GN=HSPRO2 PE=1 SV=1	S	Function unknown	nematode resistance protein-like HSPRO2 [Populus trichocarpa]
gene-POPTR_008G038200	PALG2B	10.9096	10.3385	12.2442	56.4464	52.4701	49.2761	5.85589e-254	2.28999	up	[E]	Amino acid transport and metabolism	Cellular Component: cytoplasm (GO:0005737);; Biological Process: L-phenylalanine catabolic process (GO:0006559);; Biological Process: cinnamic acid biosynthetic process (GO:0009800);; Molecular Function: ammonia-lyase activity (GO:0016841);; Molecular Function: phenylalanine ammonia-lyase activity (GO:0045548);;	K10775|0.0e+00|pop:7479878|K10775 phenylalanine ammonia-lyase [EC:4.3.1.24] | (RefSeq) phenylalanine ammonia-lyase G4	Phenylalanine metabolism (ko00360);; Phenylpropanoid biosynthesis (ko00940)	[Q]	Secondary metabolites biosynthesis, transport and catabolism	Aromatic amino acid lyase	Phenylalanine ammonia-lyase G2B OS=Populus kitakamiensis OX=34292 GN=PALG2B PE=3 SV=1	Q	Secondary metabolites biosynthesis, transport and catabolism	phenylalanine ammonia-lyase G4 [Populus trichocarpa]
gene-POPTR_015G067000	NFD4	6.32042	5.28104	5.69656	17.5634	16.128	17.6597	1.22347e-77	1.61733	up	--	--	Cellular Component: membrane (GO:0016020);; Molecular Function: transmembrane transporter activity (GO:0022857);;	--	--	--	--	Nodulin-like	Protein NUCLEAR FUSION DEFECTIVE 4 OS=Arabidopsis thaliana OX=3702 GN=NFD4 PE=3 SV=1	S	Function unknown	protein NUCLEAR FUSION DEFECTIVE 4 [Populus trichocarpa]
gene-POPTR_005G068900	AAP2	11.7545	11.1857	13.8398	77.9776	74.8749	71.2302	0	2.6663	up	--	--	Biological Process: amino acid transmembrane transport (GO:0003333);; Cellular Component: plasma membrane (GO:0005886);; Molecular Function: amino acid transmembrane transporter activity (GO:0015171);; Cellular Component: integral component of membrane (GO:0016021);;	K14209|5.3e-10|dct:110095137|K14209 solute carrier family 36 (proton-coupled amino acid transporter) | (RefSeq) amino acid transporter AVT3C	--	[E]	Amino acid transport and metabolism	Transmembrane amino acid transporter protein	Amino acid permease 2 OS=Arabidopsis thaliana OX=3702 GN=AAP2 PE=1 SV=1	E	Amino acid transport and metabolism	amino acid permease 4 isoform X1 [Populus trichocarpa]
gene-POPTR_005G112700	TLP1	1.22297	1.56278	1.64763	7.49097	6.82865	7.26339	5.14713e-60	2.31673	up	--	--	Cellular Component: extracellular region (GO:0005576);; Biological Process: defense response (GO:0006952);;	K12173|3.8e-56|gmx:100794341|K12173 BRCA1-A complex subunit BRE | (RefSeq) BRISC and BRCA1-A complex member 2	Homologous recombination (ko03440)	--	--	Thaumatin family	Thaumatin-like protein 1 OS=Arabidopsis thaliana OX=3702 GN=TLP1 PE=2 SV=1	T	Signal transduction mechanisms	thaumatin-like protein 1 [Populus trichocarpa]
gene-POPTR_016G026050	GAIP	0.774823	0.386758	1.16299	2.13147	1.58963	2.03225	1.96196e-05	1.30641	up	--	--	Biological Process: response to acid chemical (GO:0001101);; Molecular Function: molecular_function (GO:0003674);; Molecular Function: nucleic acid binding (GO:0003676);; Molecular Function: DNA binding (GO:0003677);; Molecular Function: transcription factor activity, sequence-specific DNA binding (GO:0003700);; Molecular Function: binding (GO:0005488);; Cellular Component: cellular_component (GO…	K14494|5.4e-71|pop:18106830|K14494 DELLA protein | (RefSeq) uncharacterized protein LOC18106830	Plant hormone signal transduction (ko04075)	--	--	GRAS domain family	DELLA protein GAIP OS=Cucurbita maxima OX=3661 GN=GAIP PE=2 SV=1	K	Transcription	hypothetical protein POPTR_016G026050 [Populus trichocarpa]
gene-POPTR_T134700	ATL72	1.15517	0.501299	1.24713	6.25675	5.68123	1.37309	0.00241072	1.88127	up	--	--	Cellular Component: integral component of membrane (GO:0016021);;	K19040|1.5e-88|pop:7455234|K19040 E3 ubiquitin-protein ligase ATL10/75/76/77/78 [EC:2.3.2.27] | (RefSeq) RING-H2 finger protein ATL74	--	[O]	Posttranslational modification, protein turnover, chaperones	Ring finger domain	RING-H2 finger protein ATL72 OS=Arabidopsis thaliana OX=3702 GN=ATL72 PE=2 SV=1	O	Posttranslational modification, protein turnover, chaperones	RING-H2 finger protein ATL74 [Populus trichocarpa]
gene-POPTR_008G138000	ZFP4	5.27669	5.55956	4.97049	13.9275	14.2348	10.4461	7.98516e-28	1.15008	up	--	--	Molecular Function: regulatory region nucleic acid binding (GO:0001067);; Molecular Function: molecular_function (GO:0003674);; Molecular Function: nucleic acid binding (GO:0003676);; Molecular Function: DNA binding (GO:0003677);; Molecular Function: transcription factor activity, sequence-specific DNA binding (GO:0003700);; Molecular Function: binding (GO:0005488);; Molecular Function: protein b…	--	--	--	--	--	Zinc finger protein 4 OS=Arabidopsis thaliana OX=3702 GN=ZFP4 PE=2 SV=2	S	Function unknown	zinc finger protein 4 [Populus trichocarpa]
gene-POPTR_004G134800	PER47	8.79718	8.28242	8.85744	19.3133	17.628	19.6656	6.17577e-38	1.17449	up	--	--	Molecular Function: peroxidase activity (GO:0004601);; Cellular Component: extracellular region (GO:0005576);; Biological Process: response to oxidative stress (GO:0006979);; Cellular Component: plant-type cell wall (GO:0009505);; Cellular Component: plasmodesma (GO:0009506);; Molecular Function: heme binding (GO:0020037);; Biological Process: hydrogen peroxide catabolic process (GO:0042744);; Mo…	K00430|5.9e-180|pop:7472588|K00430 peroxidase [EC:1.11.1.7] | (RefSeq) peroxidase 47	Phenylpropanoid biosynthesis (ko00940)	--	--	Peroxidase	Peroxidase 47 OS=Arabidopsis thaliana OX=3702 GN=PER47 PE=2 SV=2	Q	Secondary metabolites biosynthesis, transport and catabolism	peroxidase 47 [Populus trichocarpa]
gene-POPTR_015G045700	--	0.884314	0.842433	0.700988	1.89224	2.0111	2.00217	8.46135e-12	1.31033	up	--	--	--	--	--	--	--	--	--	--	--	uncharacterized protein LOC7475639 [Populus trichocarpa]
gene-POPTR_T130000	--	0.245719	0.169264	0.205597	1.09009	1.40863	2.23734	1.13828e-11	2.74481	up	--	--	Molecular Function: nucleotide binding (GO:0000166);; Biological Process: immune system process (GO:0002376);; Molecular Function: molecular_function (GO:0003674);; Molecular Function: binding (GO:0005488);; Cellular Component: cellular_component (GO:0005575);; Cellular Component: cell (GO:0005623);; Cellular Component: plasma membrane (GO:0005886);; Biological Process: response to stress (GO:000…	K13457|4.0e-139|pop:18094100|K13457 disease resistance protein RPM1 | (RefSeq) disease resistance protein RPM1	Plant-pathogen interaction (ko04626)	--	--	--	--	T	Signal transduction mechanisms	hypothetical protein POPTR_T130000 [Populus trichocarpa]
gene-POPTR_014G020500	CYP81Q32	0.784921	0.59683	0.922717	3.29365	2.67484	3.34065	1.16826e-23	2.02582	up	[QV]	Secondary metabolites biosynthesis, transport and catabolism;; Defense mechanisms	Molecular Function: iron ion binding (GO:0005506);; Cellular Component: membrane (GO:0016020);; Molecular Function: oxidoreductase activity, acting on paired donors, with incorporation or reduction of molecular oxygen, NAD(P)H as one donor, and incorporation of one atom of oxygen (GO:0016709);; Molecular Function: heme binding (GO:0020037);; Biological Process: defense response to other organism …	K13260|7.7e-158|nau:109240371|K13260 isoflavone/4'-methoxyisoflavone 2'-hydroxylase [EC:1.14.14.90 1.14.14.89] | (RefSeq) isoflavone 2'-hydroxylase-like	Isoflavonoid biosynthesis (ko00943)	[Q]	Secondary metabolites biosynthesis, transport and catabolism	Cytochrome P450	Cytochrome P450 81Q32 OS=Catharanthus roseus OX=4058 GN=CYP81Q32 PE=2 SV=1	Q	Secondary metabolites biosynthesis, transport and catabolism	cytochrome P450 81F3 [Populus trichocarpa]
gene-POPTR_T060300	RGA3	0.189787	0.199559	0.287999	0.785286	0.691224	0.704944	1.18907e-07	1.65678	up	--	--	Biological Process: defense response (GO:0006952);; Molecular Function: ADP binding (GO:0043531);;	K15078|3.5e-102|tcc:18614561|K15078 structure-specific endonuclease subunit SLX1 [EC:3.6.1.-] | (RefSeq) putative disease resistance protein RGA3	--	[T]	Signal transduction mechanisms	NB-ARC domain	Putative disease resistance protein RGA3 OS=Solanum bulbocastanum OX=147425 GN=RGA3 PE=2 SV=2	T	Signal transduction mechanisms	disease resistance protein RGA2 isoform X1 [Populus trichocarpa]
gene-POPTR_012G032900	CRF4	2.91637	2.70963	2.46992	5.15926	5.79101	5.06184	3.25664e-14	1.02727	up	--	--	Molecular Function: DNA binding (GO:0003677);; Molecular Function: transcription factor activity, sequence-specific DNA binding (GO:0003700);; Cellular Component: nucleus (GO:0005634);;	K13434|6.7e-34|pop:7494656|K13434 pathogenesis-related genes transcriptional activator PTI6 | (RefSeq) pathogenesis-related genes transcriptional activator PTI6	Plant-pathogen interaction (ko04626)	--	--	AP2 domain	Ethylene-responsive transcription factor CRF4 OS=Arabidopsis thaliana OX=3702 GN=CRF4 PE=1 SV=2	K	Transcription	ethylene-responsive transcription factor CRF4 [Populus trichocarpa]
gene-POPTR_003G046100	--	5.23556	8.19034	7.71849	24.7694	26.8195	23.8017	3.10014e-19	1.85419	up	--	--	--	--	--	--	--	--	--	--	--	hypothetical protein POPTR_003G046100 [Populus trichocarpa]
gene-POPTR_004G033300	--	0.161538	0.17062	0.352961	1.69544	1.61091	1.32214	1.52964e-08	2.566	up	--	--	--	--	--	--	--	Wound-induced protein	--	S	Function unknown	hypothetical protein POPTR_004G033300 [Populus trichocarpa]
gene-POPTR_001G405200	--	8.35854	8.03167	8.39462	17.7218	17.1696	15.1474	6.74818e-37	1.063	up	[H]	Coenzyme transport and metabolism	Molecular Function: methyltransferase activity (GO:0008168);; Cellular Component: integral component of membrane (GO:0016021);;	K23095|4.6e-07|cam:101512362|K23095 demethylphylloquinol methyltransferase [EC:2.1.1.329] | (RefSeq) 2-phytyl-1,4-beta-naphthoquinone methyltransferase, chloroplastic	Ubiquinone and other terpenoid-quinone biosynthesis (ko00130)	--	--	Methyltransferase domain	--	S	Function unknown	uncharacterized protein LOC18095634 [Populus trichocarpa]
gene-POPTR_003G146800	CYP78A3	0.225102	0.104099	0.069587	0.874213	1.2351	1.09782	5.09952e-15	2.87226	up	[QV]	Secondary metabolites biosynthesis, transport and catabolism;; Defense mechanisms	Molecular Function: iron ion binding (GO:0005506);; Cellular Component: membrane (GO:0016020);; Cellular Component: integral component of membrane (GO:0016021);; Molecular Function: oxidoreductase activity, acting on paired donors, with incorporation or reduction of molecular oxygen, NAD(P)H as one donor, and incorporation of one atom of oxygen (GO:0016709);; Molecular Function: heme binding (GO:…	K20619|0.0e+00|pop:7497521|K20619 cytochrome P450 family 78 subfamily A | (RefSeq) cytochrome P450 78A3	--	[Q]	Secondary metabolites biosynthesis, transport and catabolism	Cytochrome P450	Cytochrome P450 78A3 OS=Glycine max OX=3847 GN=CYP78A3 PE=2 SV=1	Q	Secondary metabolites biosynthesis, transport and catabolism	cytochrome P450 78A3 [Populus trichocarpa]
gene-POPTR_019G069300	CEL3	26.055	22.6864	24.1513	55.7324	57.9045	52.7255	1.34936e-84	1.24078	up	[G]	Carbohydrate transport and metabolism	Molecular Function: cellulase activity (GO:0008810);; Biological Process: cellulose catabolic process (GO:0030245);;	K01179|2.4e-289|pop:18108417|K01179 endoglucanase [EC:3.2.1.4] | (RefSeq) endoglucanase 9	Starch and sucrose metabolism (ko00500)	--	--	Glycosyl hydrolase family 9	Endoglucanase 9 OS=Arabidopsis thaliana OX=3702 GN=CEL3 PE=1 SV=1	G	Carbohydrate transport and metabolism	endoglucanase 9 [Populus trichocarpa]
gene-POPTR_007G020732	--	0.220773	0.260613	0.278814	1.06217	1.1068	0.873265	1.4152e-11	1.97374	up	--	--	--	--	--	--	--	--	--	--	--	hypothetical protein POPTR_007G020732 [Populus trichocarpa]
gene-POPTR_004G021300	MYB1	25.1008	23.5121	21.4032	60.3785	51.6458	54.2955	2.97545e-49	1.29566	up	--	--	Molecular Function: transcription regulatory region sequence-specific DNA binding (GO:0000976);; Molecular Function: transcription factor activity, sequence-specific DNA binding (GO:0003700);; Cellular Component: nucleus (GO:0005634);; Biological Process: cell differentiation (GO:0030154);; Molecular Function: sequence-specific DNA binding (GO:0043565);;	K09422|3.6e-11|pmum:103321763|K09422 transcription factor MYB, plant | (RefSeq) transcription factor WER-like	--	--	--	Myb-like DNA-binding domain	Transcription factor MYB1 OS=Crocosmia x crocosmiiflora OX=1053288 GN=MYB1 PE=2 SV=1	K	Transcription	MYB-like transcription factor ETC1 [Populus trichocarpa]
gene-POPTR_001G168400	--	0.579613	0.607255	1.00471	2.54729	1.64893	1.66582	6.71447e-06	1.41795	up	--	--	--	--	--	--	--	--	--	--	--	hypothetical protein POPTR_001G168400 [Populus trichocarpa]
gene-POPTR_009G048300	--	0	0	0	1.46998	1.53958	1.00306	2.26777e-16	5.67716	up	--	--	Molecular Function: molecular_function (GO:0003674);; Molecular Function: binding (GO:0005488);; Cellular Component: cellular_component (GO:0005575);; Cellular Component: intracellular (GO:0005622);; Cellular Component: cell (GO:0005623);; Cellular Component: cytoplasm (GO:0005737);; Biological Process: transport (GO:0006810);; Biological Process: ion transport (GO:0006811);; Biological Process: …	K13459|1.0e-12|hbr:110673008|K13459 disease resistance protein RPS2 | (RefSeq) probable disease resistance protein At5g63020	Plant-pathogen interaction (ko04626)	--	--	--	--	L	Replication, recombination and repair	heavy metal-associated isoprenylated plant protein 16 [Populus trichocarpa]
gene-POPTR_011G151200	SBT3.6	0.900081	0.772444	0.912084	2.15766	2.12491	2.05797	1.17709e-18	1.33401	up	[O]	Posttranslational modification, protein turnover, chaperones	Molecular Function: serine-type endopeptidase activity (GO:0004252);; Cellular Component: extracellular space (GO:0005615);;	K15333|3.0e-84|nsy:104224633|K15333 tRNA guanosine-2'-O-methyltransferase [EC:2.1.1.34] | (RefSeq) uncharacterized protein LOC104224633	--	--	--	Subtilase family	Subtilisin-like protease SBT3.6 OS=Arabidopsis thaliana OX=3702 GN=SBT3.6 PE=2 SV=1	O	Posttranslational modification, protein turnover, chaperones	subtilisin-like protease SBT3.5 isoform X1 [Populus trichocarpa]
gene-POPTR_004G117200	COBL4	0.115254	0.09342	0.090292	2.18162	2.05313	2.19375	5.80438e-48	4.29151	up	--	--	Biological Process: plant-type cell wall organization (GO:0009664);; Biological Process: plant-type cell wall biogenesis (GO:0009832);; Biological Process: cellulose microfibril organization (GO:0010215);; Cellular Component: anchored component of plasma membrane (GO:0046658);; Biological Process: plant-type cell wall cellulose biosynthetic process (GO:0052324);;	--	--	--	--	COBRA-like protein	COBRA-like protein 4 OS=Arabidopsis thaliana OX=3702 GN=COBL4 PE=2 SV=2	S	Function unknown	COBRA-like protein 4 [Populus trichocarpa]
gene-POPTR_007G077300	--	0.319981	0.245143	0.468304	3.93447	4.65598	4.35021	1.04805e-24	3.44897	up	--	--	Molecular Function: growth factor activity (GO:0008083);;	--	--	--	--	--	--	--	--	hypothetical protein POPTR_007G077300 [Populus trichocarpa]
gene-POPTR_014G041300	NAC074	11.3048	7.95284	12.0398	28.9037	28.1291	31.2785	1.76941e-104	1.64858	up	--	--	Molecular Function: DNA binding (GO:0003677);; Cellular Component: nucleus (GO:0005634);; Biological Process: regulation of transcription, DNA-templated (GO:0006355);;	--	--	--	--	No apical meristem (NAM) protein	NAC domain-containing protein 74 OS=Oryza sativa subsp. japonica OX=39947 GN=NAC074 PE=2 SV=1	K	Transcription	NAC domain-containing protein 79 isoform X3 [Populus trichocarpa]
gene-POPTR_017G053200	--	0.546224	0.406013	0.327578	3.27901	3.19567	3.01233	1.14828e-32	2.8445	up	--	--	--	--	--	--	--	--	--	--	--	uncharacterized protein LOC7461278 [Populus trichocarpa]
gene-POPTR_T080940	NUDT3	4.05152	0.773315	1.61612	10.6718	12.4934	10.7676	4.91568e-14	2.25143	up	[I]	Lipid transport and metabolism	Molecular Function: hydrolase activity (GO:0016787);;	K12860|1.7e-20|csv:101206265|K12860 pre-mRNA-splicing factor CDC5/CEF1 | (RefSeq) cell division cycle 5-like protein isoform X1	Spliceosome (ko03040)	--	--	NUDIX domain	Nudix hydrolase 3 OS=Arabidopsis thaliana OX=3702 GN=NUDT3 PE=1 SV=1	L	Replication, recombination and repair	hypothetical protein POPTR_T080940 [Populus trichocarpa]
gene-POPTR_019G130700	CYP73A13	43.2975	44.5054	48.6989	136.346	129.044	130.858	1.64685e-215	1.58983	up	[QV]	Secondary metabolites biosynthesis, transport and catabolism;; Defense mechanisms	Molecular Function: iron ion binding (GO:0005506);; Biological Process: lignin metabolic process (GO:0009808);; Cellular Component: membrane (GO:0016020);; Molecular Function: oxidoreductase activity, acting on paired donors, with incorporation or reduction of molecular oxygen, NAD(P)H as one donor, and incorporation of one atom of oxygen (GO:0016709);; Molecular Function: trans-cinnamate 4-monoo…	K00487|3.3e-297|pop:7498118|K00487 trans-cinnamate 4-monooxygenase [EC:1.14.14.91] | (RefSeq) trans-cinnamate 4-monooxygenase	Ubiquinone and other terpenoid-quinone biosynthesis (ko00130);; Phenylpropanoid biosynthesis (ko00940);; Flavonoid biosynthesis (ko00941);; Stilbenoid, diarylheptanoid and gingerol biosynthesis (ko00945)	[Q]	Secondary metabolites biosynthesis, transport and catabolism	Cytochrome P450	Trans-cinnamate 4-monooxygenase OS=Populus tremuloides OX=3693 GN=CYP73A13 PE=2 SV=1	Q	Secondary metabolites biosynthesis, transport and catabolism	trans-cinnamate 4-monooxygenase [Populus trichocarpa]
gene-POPTR_006G178500	GAE1	4.83432	4.54998	4.35057	10.7711	10.9427	10.5571	4.38666e-41	1.27921	up	[M]	Cell wall/membrane/envelope biogenesis	Molecular Function: molecular_function (GO:0003674);; Molecular Function: catalytic activity (GO:0003824);; Cellular Component: cellular_component (GO:0005575);; Cellular Component: intracellular (GO:0005622);; Cellular Component: cell (GO:0005623);; Cellular Component: cytoplasm (GO:0005737);; Cellular Component: endosome (GO:0005768);; Cellular Component: Golgi apparatus (GO:0005794);; Cellular…	K08679|1.6e-252|pop:7485273|K08679 UDP-glucuronate 4-epimerase [EC:5.1.3.6] | (RefSeq) UDP-glucuronate 4-epimerase 1	Amino sugar and nucleotide sugar metabolism (ko00520)	[M]	Cell wall/membrane/envelope biogenesis	GDP-mannose 4,6 dehydratase	UDP-glucuronate 4-epimerase 1 OS=Arabidopsis thaliana OX=3702 GN=GAE1 PE=1 SV=1	M	Cell wall/membrane/envelope biogenesis	UDP-glucuronate 4-epimerase 1 [Populus trichocarpa]
gene-POPTR_010G015400	At4g27290	0.077661	0.082221	0.086867	0.977209	0.830215	0.78803	9.54443e-23	3.25199	up	--		Molecular Function: protein serine/threonine kinase activity (GO:0004674);; Molecular Function: ATP binding (GO:0005524);; Cellular Component: integral component of membrane (GO:0016021);; Biological Process: recognition of pollen (GO:0048544);;	K24104|1.9e-74|thj:104799061|K24104 GPN-loop GTPase | (RefSeq) LOW QUALITY PROTEIN: uncharacterized protein LOC104799061	--	--	--	Protein tyrosine and serine/threonine kinase	G-type lectin S-receptor-like serine/threonine-protein kinase At4g27290 OS=Arabidopsis thaliana OX=3702 GN=At4g27290 PE=3 SV=4	T	Signal transduction mechanisms	G-type lectin S-receptor-like serine/threonine-protein kinase At4g27290 [Populus trichocarpa]
gene-POPTR_005G078600	FLZ6	0.988339	1.00461	0.705823	12.4303	14.8471	14.0151	2.44474e-125	3.92745	up	--	--	--	--	--	--	--	zinc-finger of the FCS-type, C2-C2	FCS-Like Zinc finger 6 OS=Arabidopsis thaliana OX=3702 GN=FLZ6 PE=1 SV=1	S	Function unknown	uncharacterized protein LOC7477097 [Populus trichocarpa]
gene-POPTR_016G132732	PNC1	3.86799	3.14068	3.50317	13.9479	12.6558	17.1673	5.71471e-24	2.06423	up	--	--	Molecular Function: peroxidase activity (GO:0004601);; Biological Process: response to oxidative stress (GO:0006979);; Molecular Function: heme binding (GO:0020037);; Molecular Function: metal ion binding (GO:0046872);;	K00430|8.1e-51|tcc:18602263|K00430 peroxidase [EC:1.11.1.7] | (RefSeq) cationic peroxidase 1	Phenylpropanoid biosynthesis (ko00940)	--	--	Peroxidase	Cationic peroxidase 1 OS=Arachis hypogaea OX=3818 GN=PNC1 PE=1 SV=2	Q	Secondary metabolites biosynthesis, transport and catabolism	hypothetical protein POPTR_016G132732 [Populus trichocarpa]
gene-POPTR_001G319300	--	1.16392	0.86291	1.21818	3.20775	2.87287	3.41688	6.60505e-07	1.52938	up	--	--	--	K01307|1.2e-22|pop:7484350|K01307 gamma-glutamyl hydrolase [EC:3.4.19.9] | (RefSeq) gamma-glutamyl hydrolase 2	Folate biosynthesis (ko00790)	--	--	--	--	--	--	hypothetical protein POPTR_001G319300 [Populus trichocarpa]
gene-POPTR_005G043500	At5g07610	0.894224	0.923376	1.51141	2.53893	2.3111	2.27224	5.20126e-08	1.13573	up	--	--	Molecular Function: protein binding (GO:0005515);;	K21596|1.8e-10|nta:107794376|K21596 calmodulin-binding transcription activator | (RefSeq) uncharacterized LOC107794376	--	--	--	F-box domain	F-box protein At5g07610 OS=Arabidopsis thaliana OX=3702 GN=At5g07610 PE=2 SV=1	S	Function unknown	F-box protein At5g07610 [Populus trichocarpa]
gene-POPTR_001G160100	AAH2	17.8045	17.1454	16.5433	34.8181	35.6881	31.3024	4.86655e-51	1.03322	up	[E]	Amino acid transport and metabolism	Molecular Function: hydrolase activity, acting on carbon-nitrogen (but not peptide) bonds, in linear amidines (GO:0016813);;	K02083|6.8e-265|pop:18094644|K02083 allantoate deiminase [EC:3.5.3.9] | (RefSeq) allantoate deiminase 2 isoform X2	Purine metabolism (ko00230)	--	--	Peptidase family M20/M25/M40	Allantoate deiminase 2 OS=Glycine max OX=3847 GN=AAH2 PE=1 SV=1	E	Amino acid transport and metabolism	allantoate deiminase 2 isoform X2 [Populus trichocarpa]
gene-POPTR_009G078500	--	1.34487	1.64257	1.21747	3.91086	3.20343	3.29023	4.18358e-18	1.35041	up	--	--	Molecular Function: nucleic acid binding (GO:0003676);; Molecular Function: zinc ion binding (GO:0008270);;	K22870|1.6e-51|mesc:110625142|K22870 zinc finger protein 423 | (RefSeq) uncharacterized protein LOC110625142	--	--	--	Zinc-finger of C2H2 type	--	U	Intracellular trafficking, secretion, and vesicular transport	uncharacterized protein LOC7478779 isoform X2 [Populus trichocarpa]
gene-POPTR_007G064300	MLO10	5.40902	6.14322	6.34645	15.0963	15.3077	15.1858	2.9987e-61	1.39877	up	--	--	Molecular Function: calmodulin binding (GO:0005516);; Biological Process: defense response (GO:0006952);; Biological Process: response to biotic stimulus (GO:0009607);; Cellular Component: integral component of membrane (GO:0016021);;	K08472|4.5e-311|pop:7462579|K08472 mlo protein | (RefSeq) MLO-like protein 10 isoform X1	--	--	--	Mlo family	MLO-like protein 10 OS=Arabidopsis thaliana OX=3702 GN=MLO10 PE=2 SV=1	G	Carbohydrate transport and metabolism	MLO-like protein 10 isoform X1 [Populus trichocarpa]
gene-POPTR_014G186000	--	6.60222	5.66582	8.68396	40.3982	18.5582	17.7156	1.31769e-05	1.80206	up	--	--	--	--	--	--	--	--	--	--	--	hypothetical protein POPTR_014G186000 [Populus trichocarpa]
gene-POPTR_005G005150	SPT16	9.37049	8.36066	9.03431	19.1487	21.4183	20.5187	6.90918e-41	1.23796	up	--	--	Cellular Component: FACT complex (GO:0035101);;	--	--	[E]	Amino acid transport and metabolism	Histone chaperone Rttp106-like	FACT complex subunit SPT16 OS=Arabidopsis thaliana OX=3702 GN=SPT16 PE=1 SV=1	E	Amino acid transport and metabolism	hypothetical protein POPTR_005G005150 [Populus trichocarpa]
gene-POPTR_001G246300	IPCS1	0.976201	0.908317	1.06345	3.90587	4.56559	4.40184	2.35618e-37	2.14734	up	--	--	Cellular Component: trans-Golgi network (GO:0005802);; Cellular Component: integral component of plasma membrane (GO:0005887);; Biological Process: sphingolipid biosynthetic process (GO:0030148);; Cellular Component: integral component of Golgi membrane (GO:0030173);; Cellular Component: integral component of endoplasmic reticulum membrane (GO:0030176);; Molecular Function: sphingomyelin synthase…	K22697|3.7e-120|nnu:104597051|K22697 sphingomyelin synthase-related protein 1 | (RefSeq) phosphatidylinositol:ceramide inositolphosphotransferase-like	--	[S]	Function unknown	PAP2 superfamily C-terminal	Phosphatidylinositol:ceramide inositolphosphotransferase 1 OS=Arabidopsis thaliana OX=3702 GN=IPCS1 PE=2 SV=1	S	Function unknown	phosphatidylinositol:ceramide inositolphosphotransferase 3 [Populus trichocarpa]
gene-POPTR_002G191000	BOR2	5.71703	5.63124	6.71268	28.3014	28.1509	26.5984	7.21298e-237	2.2513	up	--	--	Molecular Function: inorganic anion exchanger activity (GO:0005452);; Cellular Component: integral component of membrane (GO:0016021);;	K24194|0.0e+00|pop:7481425|K24194 boron transporter | (RefSeq) boron transporter 1	--	[P]	Inorganic ion transport and metabolism	HCO3- transporter family	Probable boron transporter 2 OS=Arabidopsis thaliana OX=3702 GN=BOR2 PE=2 SV=1	P	Inorganic ion transport and metabolism	boron transporter 1 [Populus trichocarpa]
gene-POPTR_003G194700	SIB1	0.894165	1.22623	0.434525	2.57338	2.70933	3.17611	1.96454e-08	1.69198	up	--	--	Biological Process: positive regulation of sequence-specific DNA binding transcription factor activity (GO:0051091);;	--	--	--	--	VQ motif	Sigma factor binding protein 1, chloroplastic OS=Arabidopsis thaliana OX=3702 GN=SIB1 PE=1 SV=1	S	Function unknown	hypothetical protein POPTR_003G194700 [Populus trichocarpa]
gene-POPTR_013G067000	CSA	0.448927	0.402672	0.39171	1.18971	1.2315	1.21743	2.31275e-10	1.55089	up	--	--	Molecular Function: transcription regulatory region sequence-specific DNA binding (GO:0000976);; Molecular Function: transcription factor activity, sequence-specific DNA binding (GO:0003700);; Molecular Function: transcription cofactor activity (GO:0003712);; Cellular Component: nucleus (GO:0005634);; Biological Process: regulation of transcription, DNA-templated (GO:0006355);; Molecular Function…	K09422|1.6e-230|pop:7489708|K09422 transcription factor MYB, plant | (RefSeq) transcription factor CSA	--	[K]	Transcription	Myb-like DNA-binding domain	Transcription factor CSA OS=Oryza sativa subsp. japonica OX=39947 GN=CSA PE=2 SV=2	--	--	transcription factor CSA [Populus trichocarpa]
gene-POPTR_T116800	SAG101	1.44164	1.56857	1.82168	2.34358	4.35423	2.84546	0.000226445	1.00223	up	--	--	Biological Process: positive regulation of defense response to virus by host (GO:0002230);; Biological Process: regulation of immune system process (GO:0002682);; Biological Process: regulation of immune effector process (GO:0002697);; Biological Process: regulation of response to biotic stimulus (GO:0002831);; Biological Process: positive regulation of response to biotic stimulus (GO:0002833);; …	K18875|3.8e-24|soe:110794485|K18875 enhanced disease susceptibility 1 protein | (RefSeq) protein EDS1L-like	Plant-pathogen interaction (ko04626)	--	--	Enhanced disease susceptibility 1 protein EP domain	Senescence-associated carboxylesterase 101 OS=Arabidopsis thaliana OX=3702 GN=SAG101 PE=1 SV=1	S	Function unknown	hypothetical protein POPTR_T116800 [Populus trichocarpa]
gene-POPTR_002G193400	--	1.08286	1.36601	0.736457	2.69285	2.03158	2.68959	3.42605e-05	1.22995	up	--	--	--	--	--	--	--	--	--	--	--	hypothetical protein POPTR_002G193400 [Populus trichocarpa]
gene-POPTR_002G001300	--	1.05367	0.994249	1.37711	2.96791	3.18937	2.92334	6.21341e-14	1.43369	up	--	--	Cellular Component: integral component of membrane (GO:0016021);;	--	--	--	--	--	--	--	--	hypothetical protein POPTR_002G001300 [Populus trichocarpa]
gene-POPTR_002G080200	--	0.290475	0.337305	0.49156	1.12312	0.847139	0.856365	0.00142456	1.26439	up	--	--	--	--	--	--	--	--	--	S	Function unknown	proline-rich receptor-like protein kinase PERK14 [Populus trichocarpa]
gene-POPTR_002G233200	AVT1H	0.034996	0.027794	0.104878	1.08669	0.816612	1.06611	4.74196e-20	3.86159	up	--	--	Cellular Component: integral component of membrane (GO:0016021);;	K15015|7.9e-72|mdm:103450244|K15015 solute carrier family 32 (vesicular inhibitory amino acid transporter) | (RefSeq) amino acid transporter AVT1D-like	--	[E]	Amino acid transport and metabolism	Transmembrane amino acid transporter protein	Amino acid transporter AVT1H OS=Arabidopsis thaliana OX=3702 GN=AVT1H PE=3 SV=1	E	Amino acid transport and metabolism	amino acid transporter AVT1H isoform X2 [Populus trichocarpa]
gene-POPTR_005G096400	SAUR72	0.623472	0.838812	0.557438	17.8937	18.8766	18.8045	7.14005e-144	4.73637	up	--	--	Biological Process: response to auxin (GO:0009733);;	K14488|2.2e-62|pop:7492101|K14488 SAUR family protein | (RefSeq) auxin-responsive protein SAUR71	Plant hormone signal transduction (ko04075)	--	--	Auxin responsive protein	Auxin-responsive protein SAUR72 OS=Arabidopsis thaliana OX=3702 GN=SAUR72 PE=1 SV=1	S	Function unknown	auxin-responsive protein SAUR71-like [Populus alba]
gene-POPTR_008G140500	BRL2	5.04697	7.17833	6.61885	16.8137	16.7415	17.3576	2.48728e-53	1.48188	up	[T]	Signal transduction mechanisms	Molecular Function: protein serine/threonine kinase activity (GO:0004674);; Molecular Function: ATP binding (GO:0005524);; Cellular Component: plasma membrane (GO:0005886);; Biological Process: hormone-mediated signaling pathway (GO:0009755);; Cellular Component: integral component of membrane (GO:0016021);;	K13415|2.7e-150|nnu:104605494|K13415 protein brassinosteroid insensitive 1 [EC:2.7.10.1 2.7.11.1] | (RefSeq) systemin receptor SR160-like	Plant hormone signal transduction (ko04075)	--	--	Leucine rich repeat	Serine/threonine-protein kinase BRI1-like 2 OS=Arabidopsis thaliana OX=3702 GN=BRL2 PE=1 SV=1	T	Signal transduction mechanisms	serine/threonine-protein kinase BRI1-like 2 [Populus trichocarpa]
gene-POPTR_T045950	--	0.701052	0.462227	0.477985	1.39108	1.51998	1.22235	0.00111399	1.26287	up	--	--	Cellular Component: integral component of membrane (GO:0016021);;	--	--	--	--	--	--	--	--	hypothetical protein POPTR_T045950 [Populus trichocarpa]
gene-POPTR_009G148900	PSK5	11.0974	11.8398	8.79535	28.2031	29.3495	31.0858	1.77139e-50	1.52514	up	--	--	Cellular Component: extracellular region (GO:0005576);; Molecular Function: growth factor activity (GO:0008083);; Biological Process: cell proliferation (GO:0008283);;	--	--	--	--	Phytosulfokine precursor protein (PSK)	Phytosulfokines 5 OS=Oryza sativa subsp. japonica OX=39947 GN=PSK5 PE=1 SV=1	S	Function unknown	putative phytosulfokines 6 [Populus trichocarpa]
gene-POPTR_T023400	At4g27290	0.475596	0.527302	0.474532	1.02298	1.20976	1.06825	1.28683e-07	1.18545	up	[T]	Signal transduction mechanisms	Molecular Function: protein serine/threonine kinase activity (GO:0004674);; Molecular Function: ATP binding (GO:0005524);; Cellular Component: plasma membrane (GO:0005886);; Biological Process: protein phosphorylation (GO:0006468);; Cellular Component: integral component of membrane (GO:0016021);; Molecular Function: ubiquitin protein ligase binding (GO:0031625);; Biological Process: recognition …	K24104|5.5e-81|thj:104799061|K24104 GPN-loop GTPase | (RefSeq) LOW QUALITY PROTEIN: uncharacterized protein LOC104799061	--	--	--	Protein tyrosine and serine/threonine kinase	G-type lectin S-receptor-like serine/threonine-protein kinase At4g27290 OS=Arabidopsis thaliana OX=3702 GN=At4g27290 PE=3 SV=4	--	--	G-type lectin S-receptor-like serine/threonine-protein kinase At4g27290 [Populus trichocarpa]
gene-POPTR_005G207800	--	10.5704	10.7277	6.33084	19.3074	20.3109	28.8495	8.20287e-12	1.33786	up	--	--	--	--	--	--	--	--	--	--	--	hypothetical protein POPTR_005G207800 [Populus trichocarpa]
gene-POPTR_001G118800	ODO1	0.317276	0.027068	0.173693	4.11013	4.50873	3.11889	1.37863e-08	3.65594	up	--	--	Molecular Function: transcription regulatory region sequence-specific DNA binding (GO:0000976);; Molecular Function: transcription factor activity, sequence-specific DNA binding (GO:0003700);; Cellular Component: nucleus (GO:0005634);; Biological Process: cell differentiation (GO:0030154);; Molecular Function: sequence-specific DNA binding (GO:0043565);;	K09422|5.8e-160|pop:18094393|K09422 transcription factor MYB, plant | (RefSeq) protein ODORANT1	--	[K]	Transcription	Myb-like DNA-binding domain	Protein ODORANT1 OS=Petunia hybrida OX=4102 GN=ODO1 PE=2 SV=1	--	--	protein ODORANT1 [Populus trichocarpa]
gene-POPTR_004G210600	FLA12	0	0.019729	0	5.44067	5.48099	5.97275	4.74695e-43	7.40546	up	[R]	General function prediction only	Cellular Component: plasma membrane (GO:0005886);; Biological Process: plant-type secondary cell wall biogenesis (GO:0009834);;	--	--	--	--	Fasciclin domain	Fasciclin-like arabinogalactan protein 12 OS=Arabidopsis thaliana OX=3702 GN=FLA12 PE=2 SV=2	S	Function unknown	fasciclin-like arabinogalactan protein 12 [Populus trichocarpa]
gene-POPTR_010G059700	At1g60420	13.1823	13.8828	13.0306	36.2305	36.7672	36.7204	7.37112e-124	1.50206	up	[O]	Posttranslational modification, protein turnover, chaperones	Biological Process: cell redox homeostasis (GO:0045454);;	K17609|0.0e+00|pop:7477022|K17609 nucleoredoxin [EC:1.8.1.8] | (RefSeq) probable nucleoredoxin 1	--	[R]	General function prediction only	Thioredoxin-like	Probable nucleoredoxin 1 OS=Arabidopsis thaliana OX=3702 GN=At1g60420 PE=1 SV=1	O	Posttranslational modification, protein turnover, chaperones	probable nucleoredoxin 1 [Populus trichocarpa]
gene-POPTR_008G050700	TIP1-3	0.244844	0.395766	0.474161	4.82874	5.41133	4.49665	8.64321e-72	3.69712	up	[G]	Carbohydrate transport and metabolism	Molecular Function: urea transmembrane transporter activity (GO:0015204);; Molecular Function: water channel activity (GO:0015250);; Cellular Component: integral component of membrane (GO:0016021);;	K09873|3.4e-138|pop:7457918|K09873 aquaporin TIP | (RefSeq) aquaporin TIP1-3	--	[G]	Carbohydrate transport and metabolism	Major intrinsic protein	Aquaporin TIP1-3 OS=Arabidopsis thaliana OX=3702 GN=TIP1-3 PE=1 SV=1	G	Carbohydrate transport and metabolism	aquaporin TIP1-3 [Populus trichocarpa]
gene-POPTR_006G237100	--	2.87062	2.37798	2.85659	146.223	139.427	137.255	0	5.73516	up	--	--	--	--	--	--	--	Polyketide cyclase / dehydrase and lipid transport	--	S	Function unknown	lachrymatory-factor synthase [Populus trichocarpa]
gene-POPTR_014G115000	XTH33	1.12023	1.04157	1.14907	4.98832	5.54319	4.90175	2.1472e-37	2.23967	up	[G]	Carbohydrate transport and metabolism	Molecular Function: hydrolase activity, hydrolyzing O-glycosyl compounds (GO:0004553);; Cellular Component: cell wall (GO:0005618);; Cellular Component: integral component of plasma membrane (GO:0005887);; Biological Process: plant-type cell wall modification involved in multidimensional cell growth (GO:0009831);; Biological Process: xyloglucan metabolic process (GO:0010411);; Molecular Function:…	K08235|1.3e-182|pop:7455400|K08235 xyloglucan:xyloglucosyl transferase [EC:2.4.1.207] | (RefSeq) probable xyloglucan endotransglucosylase/hydrolase protein 33	--	--	--	Glycosyl hydrolases family 16	Probable xyloglucan endotransglucosylase/hydrolase protein 33 OS=Arabidopsis thaliana OX=3702 GN=XTH33 PE=1 SV=2	G	Carbohydrate transport and metabolism	probable xyloglucan endotransglucosylase/hydrolase protein 33 [Populus trichocarpa]
gene-POPTR_002G156800	SDR1	2.02134	2.08587	2.14465	7.57243	8.70518	7.37713	2.67223e-33	1.94656	up	[IQR]	Lipid transport and metabolism;; Secondary metabolites biosynthesis, transport and catabolism;; General function prediction only	Cellular Component: membrane (GO:0016020);; Biological Process: oxidation-reduction process (GO:0055114);;	K15095|2.8e-174|pop:7461754|K15095 (+)-neomenthol dehydrogenase [EC:1.1.1.208] | (RefSeq) (+)-neomenthol dehydrogenase	--	[Q]	Secondary metabolites biosynthesis, transport and catabolism	short chain dehydrogenase	(+)-neomenthol dehydrogenase OS=Arabidopsis thaliana OX=3702 GN=SDR1 PE=1 SV=1	Q	Secondary metabolites biosynthesis, transport and catabolism	(+)-neomenthol dehydrogenase [Populus trichocarpa]
gene-POPTR_001G097600	FIGL1	2.96419	3.57725	3.34545	14.757	15.0109	14.7469	1.30454e-166	2.21816	up	[O]	Posttranslational modification, protein turnover, chaperones	Molecular Function: ATP binding (GO:0005524);;	K03231|3.2e-124|mtr:MTR_1g101870|K03231 elongation factor 1-alpha | (RefSeq) elongation factor 1-alpha	RNA transport (ko03013)	[O]	Posttranslational modification, protein turnover, chaperones	ATPase family associated with various cellular activities (AAA)	ATPase family AAA domain-containing protein FIGL1 OS=Arabidopsis thaliana OX=3702 GN=FIGL1 PE=2 SV=2	O	Posttranslational modification, protein turnover, chaperones	cell division control protein 48 homolog C [Populus trichocarpa]
gene-POPTR_T050300	--	0.224919	0.220219	0.394485	0.975519	0.932256	0.814087	9.60531e-05	1.60898	up	--	--	Molecular Function: protein binding (GO:0005515);;	K16225|3.6e-08|ath:AT5G45260|K16225 probable WRKY transcription factor 52 | (RefSeq) RRS1; Disease resistance protein (TIR-NBS-LRR class)	Plant-pathogen interaction (ko04626)	--	--	Leucine Rich repeats (2 copies)	--	T	Signal transduction mechanisms	hypothetical protein POPTR_T050300 [Populus trichocarpa]
gene-POPTR_010G004300	MYB61	1.17288	1.48256	1.31854	3.46333	3.86566	4.87788	7.64854e-19	1.64726	up	--	--	Molecular Function: transcription regulatory region sequence-specific DNA binding (GO:0000976);; Molecular Function: transcription factor activity, sequence-specific DNA binding (GO:0003700);; Cellular Component: nucleus (GO:0005634);; Biological Process: regulation of stomatal movement (GO:0010119);; Biological Process: cell differentiation (GO:0030154);; Molecular Function: sequence-specific DN…	K09422|3.8e-204|pop:18102239|K09422 transcription factor MYB, plant | (RefSeq) transcription factor MYB8	--	[K]	Transcription	Myb-like DNA-binding domain	Transcription factor MYB61 OS=Arabidopsis thaliana OX=3702 GN=MYB61 PE=2 SV=1	--	--	transcription factor MYB8 [Populus trichocarpa]
gene-POPTR_017G084200	--	0.056961	0.082721	0.026467	1.92951	1.75866	1.73084	8.08778e-44	4.69173	up	--	--	Cellular Component: integral component of membrane (GO:0016021);;	--	--	--	--	Protein of unknown function (DUF1666)	--	S	Function unknown	uncharacterized protein LOC7495979 [Populus trichocarpa]
gene-POPTR_003G222600	PBL16	0.880138	1.12414	1.53964	2.55265	2.52102	2.9223	4.36545e-10	1.21517	up	[M]	Cell wall/membrane/envelope biogenesis	Molecular Function: protein serine/threonine kinase activity (GO:0004674);; Molecular Function: ATP binding (GO:0005524);;	K00924|1.6e-94|csat:104712177|K00924 kinase [EC:2.7.1.-] | (RefSeq) probable receptor-like protein kinase At3g55450 isoform X1	--	[T]	Signal transduction mechanisms	Protein tyrosine and serine/threonine kinase	Probable serine/threonine-protein kinase PBL16 OS=Arabidopsis thaliana OX=3702 GN=PBL16 PE=1 SV=1	T	Signal transduction mechanisms	probable serine/threonine-protein kinase PBL16 [Populus trichocarpa]
gene-POPTR_002G123000	CYCD3-3	8.7499	7.88519	6.99388	24.0501	22.9831	22.7199	3.11593e-73	1.60674	up	--	--	Biological Process: regulation of cyclin-dependent protein serine/threonine kinase activity (GO:0000079);; Cellular Component: cyclin-dependent protein kinase holoenzyme complex (GO:0000307);; Cellular Component: nucleus (GO:0005634);; Cellular Component: cytoplasm (GO:0005737);; Molecular Function: cyclin-dependent protein serine/threonine kinase regulator activity (GO:0016538);; Cellular Compon…	K14505|2.6e-203|pop:7472682|K14505 cyclin D3, plant | (RefSeq) cyclin-D3-1	Plant hormone signal transduction (ko04075)	[D]	Cell cycle control, cell division, chromosome partitioning	Cyclin, N-terminal domain	Cyclin-D3-3 OS=Arabidopsis thaliana OX=3702 GN=CYCD3-3 PE=2 SV=1	D	Cell cycle control, cell division, chromosome partitioning	cyclin-D3-1 [Populus trichocarpa]
gene-POPTR_007G107200	GUX1	2.73903	2.49218	3.08236	6.59353	6.67387	6.11191	1.42304e-31	1.26534	up	[M]	Cell wall/membrane/envelope biogenesis	Cellular Component: Golgi apparatus (GO:0005794);; Biological Process: plant-type secondary cell wall biogenesis (GO:0009834);; Molecular Function: glucuronosyltransferase activity (GO:0015020);; Biological Process: xylan biosynthetic process (GO:0045492);;	K20890|0.0e+00|pop:7466731|K20890 xylan alpha-glucuronosyltransferase [EC:2.4.1.-] | (RefSeq) UDP-glucuronate:xylan alpha-glucuronosyltransferase 1 isoform X5	--	[G]	Carbohydrate transport and metabolism	Glycosyl transferase family 8	UDP-glucuronate:xylan alpha-glucuronosyltransferase 1 OS=Arabidopsis thaliana OX=3702 GN=GUX1 PE=2 SV=1	G	Carbohydrate transport and metabolism	UDP-glucuronate:xylan alpha-glucuronosyltransferase 1 isoform X2 [Populus trichocarpa]
gene-POPTR_017G055000	LECRKS2	1.82549	1.77294	1.68513	4.32079	4.39226	4.57941	9.27514e-27	1.37158	up	[T]	Signal transduction mechanisms	Biological Process: defense response to oomycetes (GO:0002229);; Molecular Function: transmembrane receptor protein serine/threonine kinase activity (GO:0004675);; Molecular Function: ATP binding (GO:0005524);; Cellular Component: plasma membrane (GO:0005886);; Biological Process: defense response (GO:0006952);; Biological Process: defense response to bacterium (GO:0042742);;	K13416|3.4e-91|zju:107427532|K13416 brassinosteroid insensitive 1-associated receptor kinase 1 [EC:2.7.10.1 2.7.11.1] | (RefSeq) dual specificity protein kinase zakA-like	MAPK signaling pathway - plant (ko04016);; Plant hormone signal transduction (ko04075);; Plant-pathogen interaction (ko04626)	[T]	Signal transduction mechanisms	Protein kinase domain	Receptor like protein kinase S.2 OS=Arabidopsis thaliana OX=3702 GN=LECRKS2 PE=2 SV=2	T	Signal transduction mechanisms	hypothetical protein POPTR_017G055000 [Populus trichocarpa]
gene-POPTR_001G206900	NAC104	1.00604	0.601667	0.77504	5.98172	4.43529	5.70183	1.44871e-27	2.72463	up	--	--	Molecular Function: DNA binding (GO:0003677);; Cellular Component: nucleus (GO:0005634);; Biological Process: regulation of transcription, DNA-templated (GO:0006355);; Biological Process: system development (GO:0048731);;	K00521|2.4e-19|cmos:111447866|K00521 ferric-chelate reductase [EC:1.16.1.7] | (RefSeq) ferric reduction oxidase 7, chloroplastic-like	--	--	--	No apical meristem (NAM) protein	NAC domain-containing protein 104 OS=Arabidopsis thaliana OX=3702 GN=NAC104 PE=2 SV=1	K	Transcription	NAC domain-containing protein 104 [Populus trichocarpa]
gene-POPTR_010G085700	FLZ8	8.5463	8.5957	9.39194	26.8846	26.2604	24.412	3.26889e-106	1.59737	up	--	--	--	K02930|2.1e-18|vvi:100253424|K02930 large subunit ribosomal protein L4e | (RefSeq) 60S ribosomal protein L4-like	Ribosome (ko03010)	--	--	zinc-finger of the FCS-type, C2-C2	FCS-Like Zinc finger 8 OS=Arabidopsis thaliana OX=3702 GN=FLZ8 PE=1 SV=1	S	Function unknown	protein MARD1 [Populus trichocarpa]
gene-POPTR_006G110200	UBC28	249.718	233.398	231.663	666.318	638.622	629.056	3.19629e-203	1.48716	up	--	--	Biological Process: protein polyubiquitination (GO:0000209);; Molecular Function: ATP binding (GO:0005524);; Cellular Component: nucleus (GO:0005634);; Biological Process: ubiquitin-dependent protein catabolic process (GO:0006511);; Molecular Function: ubiquitin conjugating enzyme activity (GO:0061631);;	K06689|1.1e-83|bvg:104886653|K06689 ubiquitin-conjugating enzyme E2 D [EC:2.3.2.23] | (RefSeq) ubiquitin-conjugating enzyme E2 28	Ubiquitin mediated proteolysis (ko04120);; Protein processing in endoplasmic reticulum (ko04141)	[O]	Posttranslational modification, protein turnover, chaperones	Ubiquitin-conjugating enzyme	Ubiquitin-conjugating enzyme E2 28 OS=Arabidopsis thaliana OX=3702 GN=UBC28 PE=1 SV=1	O	Posttranslational modification, protein turnover, chaperones	ubiquitin-conjugating enzyme E2 28 [Populus trichocarpa]
gene-POPTR_016G002700	PFK2	17.8347	19.3257	19.6231	40.76	40.9327	40.3935	8.00967e-82	1.15761	up	[G]	Carbohydrate transport and metabolism	Molecular Function: 6-phosphofructokinase activity (GO:0003872);; Molecular Function: ATP binding (GO:0005524);; Cellular Component: cytoplasm (GO:0005737);; Biological Process: fructose 6-phosphate metabolic process (GO:0006002);; Molecular Function: metal ion binding (GO:0046872);;	K00850|1.2e-280|pop:18105991|K00850 6-phosphofructokinase 1 [EC:2.7.1.11] | (RefSeq) ATP-dependent 6-phosphofructokinase 2	Glycolysis / Gluconeogenesis (ko00010);; Pentose phosphate pathway (ko00030);; Fructose and mannose metabolism (ko00051);; Galactose metabolism (ko00052);; Carbon metabolism (ko01200);; Biosynthesis of amino acids (ko01230);; RNA degradation (ko03018)	[G]	Carbohydrate transport and metabolism	Phosphofructokinase	ATP-dependent 6-phosphofructokinase 2 OS=Arabidopsis thaliana OX=3702 GN=PFK2 PE=1 SV=1	G	Carbohydrate transport and metabolism	ATP-dependent 6-phosphofructokinase 2 [Populus trichocarpa]
gene-POPTR_009G132700	NFD4	0.539787	0.262508	0.434872	1.08405	0.812592	1.00664	4.73642e-05	1.22278	up	--	--	Cellular Component: membrane (GO:0016020);;	--	--	--	--	Nodulin-like	Protein NUCLEAR FUSION DEFECTIVE 4 OS=Arabidopsis thaliana OX=3702 GN=NFD4 PE=3 SV=1	S	Function unknown	protein NUCLEAR FUSION DEFECTIVE 4 [Populus trichocarpa]
gene-POPTR_001G166800	--	2.95381	3.38189	2.87675	6.32716	6.59792	6.10552	1.44759e-24	1.08895	up	[R]	General function prediction only	--	K00789|7.4e-28|pper:18785694|K00789 S-adenosylmethionine synthetase [EC:2.5.1.6] | (RefSeq) S-adenosylmethionine synthase	Cysteine and methionine metabolism (ko00270);; Biosynthesis of amino acids (ko01230)	--	--	von Willebrand factor type A domain	--	S	Function unknown	hypothetical protein POPTR_001G166800 [Populus trichocarpa]
gene-POPTR_001G099700	ROH1	1.98337	2.15402	1.92921	4.17237	4.17472	4.29844	2.3453e-16	1.10081	up	--	--	--	--	--	--	--	Protein BYPASS1-related	Protein ROH1 OS=Arabidopsis thaliana OX=3702 GN=ROH1 PE=1 SV=1	S	Function unknown	uncharacterized protein LOC7479291 [Populus trichocarpa]
gene-POPTR_004G197600	NHL13	3.41981	3.71003	3.23201	9.02343	11.4963	10.5487	1.22139e-29	1.61894	up	--	--	Cellular Component: cellular_component (GO:0005575);; Cellular Component: cell-cell junction (GO:0005911);; Biological Process: response to stress (GO:0006950);; Biological Process: defense response (GO:0006952);; Biological Process: biological_process (GO:0008150);; Cellular Component: plasmodesma (GO:0009506);; Biological Process: response to external stimulus (GO:0009605);; Biological Process:…	--	--	--	--	Late embryogenesis abundant protein	NDR1/HIN1-like protein 13 OS=Arabidopsis thaliana OX=3702 GN=NHL13 PE=2 SV=1	S	Function unknown	NDR1/HIN1-like protein 13 [Populus trichocarpa]
gene-POPTR_T075900	DBR	1.79997	2.11092	2.33964	6.30096	8.16837	6.2334	3.84481e-31	1.76389	up	[QR]	Secondary metabolites biosynthesis, transport and catabolism;; General function prediction only	Molecular Function: 2-alkenal reductase [NAD(P)] activity (GO:0032440);;	K19825|1.5e-136|vvi:100256090|K19825 2-alkenal reductase (NADP+) [EC:1.3.1.102] | (RefSeq) NADP-dependent alkenal double bond reductase P2-like	--	[R]	General function prediction only	Zinc-binding dehydrogenase	2-alkenal reductase (NADP(+)-dependent) OS=Nicotiana tabacum OX=4097 GN=DBR PE=1 SV=1	S	Function unknown	2-alkenal reductase (NADP(+)-dependent) [Populus trichocarpa]
gene-POPTR_T170200	WSD1	48.7498	50.0389	48.5287	105.609	113.702	108.671	6.52955e-133	1.20585	up	[Q]	Secondary metabolites biosynthesis, transport and catabolism	Molecular Function: diacylglycerol O-acyltransferase activity (GO:0004144);; Cellular Component: plasma membrane (GO:0005886);; Biological Process: triglyceride biosynthetic process (GO:0019432);; Molecular Function: long-chain-alcohol O-fatty-acyltransferase activity (GO:0047196);;	K15406|4.6e-94|bna:106451554|K15406 wax-ester synthase / diacylglycerol O-acyltransferase [EC:2.3.1.75 2.3.1.20] | (RefSeq) O-acyltransferase WSD1	Cutin, suberine and wax biosynthesis (ko00073)	--	--	WS/DGAT C-terminal domain	O-acyltransferase WSD1 OS=Arabidopsis thaliana OX=3702 GN=WSD1 PE=2 SV=1	S	Function unknown	O-acyltransferase WSD1 [Populus trichocarpa]
gene-POPTR_017G145200	At3g47570	1.30836	1.16031	1.09376	3.36559	2.44828	2.95772	8.48815e-18	1.33703	up	[T]	Signal transduction mechanisms	Molecular Function: protein serine/threonine kinase activity (GO:0004674);; Molecular Function: ATP binding (GO:0005524);; Cellular Component: integral component of membrane (GO:0016021);;	K20181|1.9e-102|mtr:MTR_5g026090|K20181 vacuolar protein sorting-associated protein 18 | (RefSeq) vacuolar sorting-associated-like protein	--	--	--	Protein kinase domain	Probable LRR receptor-like serine/threonine-protein kinase At3g47570 OS=Arabidopsis thaliana OX=3702 GN=At3g47570 PE=2 SV=1	T	Signal transduction mechanisms	probable LRR receptor-like serine/threonine-protein kinase At3g47570 [Populus trichocarpa]
gene-POPTR_018G076801	--	1.91934	1.1106	0.505679	16.6043	14.3605	16.6783	1.19919e-24	3.56605	up	--	--	--	--	--	--	--	DVL family	--	S	Function unknown	hypothetical protein POPTR_018G072101 [Populus trichocarpa]
gene-POPTR_008G156000	STY13	15.4954	14.4469	14.2461	31.8655	34.7183	33.161	9.02142e-95	1.21246	up	[T]	Signal transduction mechanisms	Molecular Function: protein kinase activity (GO:0004672);; Molecular Function: protein serine/threonine kinase activity (GO:0004674);; Molecular Function: ATP binding (GO:0005524);; Cellular Component: plasma membrane (GO:0005886);;	K01968|3.1e-178|psom:113350054|K01968 3-methylcrotonyl-CoA carboxylase alpha subunit [EC:6.4.1.4] | (RefSeq) LOW QUALITY PROTEIN: methylcrotonoyl-CoA carboxylase subunit alpha, mitochondrial-like	Valine, leucine and isoleucine degradation (ko00280)	[T]	Signal transduction mechanisms	Protein tyrosine and serine/threonine kinase	Serine/threonine-protein kinase STY13 OS=Arabidopsis thaliana OX=3702 GN=STY13 PE=1 SV=2	T	Signal transduction mechanisms	serine/threonine-protein kinase STY13 isoform X1 [Populus trichocarpa]
gene-POPTR_012G141300	LTI65	0.759065	0.593	0.903422	4.86669	5.4357	4.59162	5.2296e-63	2.744	up	--	--	Biological Process: response to abscisic acid (GO:0009737);;	--	--	--	--	CAP160 repeat	Low-temperature-induced 65 kDa protein OS=Arabidopsis thaliana OX=3702 GN=LTI65 PE=2 SV=2	S	Function unknown	low-temperature-induced 65 kDa protein [Populus trichocarpa]
gene-POPTR_006G150300	MYBS3	1.24137	1.16756	1.12547	16.2987	15.3865	14.7498	1.6788e-186	3.73399	up	--	--	Molecular Function: DNA binding (GO:0003677);; Cellular Component: nucleus (GO:0005634);;	K08869|2.1e-22|cre:CHLREDRAFT_165812|K08869 aarF domain-containing kinase | (RefSeq) predicted protein	--	--	--	Myb-like DNA-binding domain	Transcription factor MYBS3 OS=Oryza sativa subsp. japonica OX=39947 GN=MYBS3 PE=2 SV=1	K	Transcription	hypothetical protein POPTR_006G150300 [Populus trichocarpa]
gene-POPTR_008G159200	--	2.09072	1.72388	2.38366	11.6769	10.2379	11.7021	2.16666e-117	2.48241	up	--	--	--	--	--	--	--	--	--	--	--	uncharacterized protein LOC7473436 [Populus trichocarpa]
gene-POPTR_010G194600	PROT1	2.13509	1.82029	1.65867	4.86893	4.24725	4.33031	9.34481e-21	1.29691	up	--	--	Cellular Component: integral component of membrane (GO:0016021);;	--	--	[E]	Amino acid transport and metabolism	Transmembrane amino acid transporter protein	Proline transporter 1 OS=Arabidopsis thaliana OX=3702 GN=PROT1 PE=1 SV=1	E	Amino acid transport and metabolism	proline transporter 1 isoform X2 [Populus trichocarpa]
gene-POPTR_008G133100	--	0	0	0	1.75745	2.06274	1.79374	1.6898e-14	5.40276	up	--	--	--	--	--	--	--	--	--	--	--	hypothetical protein POPTR_008G133100 [Populus trichocarpa]
gene-POPTR_006G203000	BLH1	16.6671	16.7171	17.5031	69.0622	68.2271	66.0051	0	2.0904	up	--	--	Molecular Function: RNA polymerase II core promoter proximal region sequence-specific DNA binding (GO:0000978);; Molecular Function: RNA polymerase II transcription factor activity, sequence-specific DNA binding (GO:0000981);; Cellular Component: nucleus (GO:0005634);; Biological Process: regulation of transcription from RNA polymerase II promoter (GO:0006357);;	--	--	[K]	Transcription	Associated with HOX	BEL1-like homeodomain protein 1 OS=Arabidopsis thaliana OX=3702 GN=BLH1 PE=1 SV=1	K	Transcription	BEL1-like homeodomain protein 1 [Populus trichocarpa]
gene-POPTR_016G131900	TOL6	9.23932	9.96213	10.4511	18.7679	18.228	20.8118	2.93533e-39	1.01426	up	--	--	Molecular Function: protein serine/threonine phosphatase activity (GO:0004722);; Molecular Function: magnesium-dependent protein serine/threonine phosphatase activity (GO:0004724);; Biological Process: intracellular protein transport (GO:0006886);;	K13141|3.6e-68|csat:104745793|K13141 integrator complex subunit 4 | (RefSeq) protein SIEL-like	--	[U]	Intracellular trafficking, secretion, and vesicular transport	VHS domain	TOM1-like protein 6 OS=Arabidopsis thaliana OX=3702 GN=TOL6 PE=1 SV=1	U	Intracellular trafficking, secretion, and vesicular transport	TOM1-like protein 6 [Populus trichocarpa]
gene-POPTR_010G208600	BHLH110	0	0	0.148716	1.91279	1.95528	2.33527	0.00271317	2.54451	up	--	--	Molecular Function: transcriptional activator activity, RNA polymerase II transcription regulatory region sequence-specific binding (GO:0001228);; Cellular Component: nucleus (GO:0005634);; Molecular Function: protein dimerization activity (GO:0046983);;	K05765|6.7e-31|fve:101301142|K05765 cofilin | (RefSeq) uncharacterized LOC101301142	--	--	--	--	Transcription factor bHLH110 OS=Arabidopsis thaliana OX=3702 GN=BHLH110 PE=2 SV=2	K	Transcription	transcription factor bHLH113 isoform X1 [Populus trichocarpa]
gene-POPTR_009G020000	--	0.496404	0.197825	0.259917	1.34027	1.07277	1.31949	1.32299e-05	1.85141	up	--	--	Cellular Component: integral component of membrane (GO:0016021);;	--	--	--	--	--	--	--	--	uncharacterized protein LOC112328674 [Populus trichocarpa]
gene-POPTR_003G097100	CSLD3	0.187448	0.189218	0.182883	0.372411	0.451816	0.372668	0.000290724	1.09598	up	[N]	Cell motility	Cellular Component: Golgi apparatus (GO:0005794);; Cellular Component: trans-Golgi network (GO:0005802);; Cellular Component: plasma membrane (GO:0005886);; Biological Process: plant-type primary cell wall biogenesis (GO:0009833);; Cellular Component: integral component of membrane (GO:0016021);; Molecular Function: cellulose synthase (UDP-forming) activity (GO:0016760);; Biological Process: cell…	K20924|0.0e+00|pop:7456098|K20924 cellulose synthase-like protein [EC:2.4.1.-] | (RefSeq) cellulose synthase-like protein D3	--	--	--	Cellulose synthase	Cellulose synthase-like protein D3 OS=Arabidopsis thaliana OX=3702 GN=CSLD3 PE=1 SV=1	G	Carbohydrate transport and metabolism	cellulose synthase-like protein D3 [Populus trichocarpa]
gene-POPTR_001G235500	MYB48	2.35103	2.54334	2.63315	146.362	166.336	154.021	0	5.96579	up	--	--	Molecular Function: DNA binding (GO:0003677);;	K09422|3.1e-101|pop:7485724|K09422 transcription factor MYB, plant | (RefSeq) transcription factor MYB48 isoform X2	--	[K]	Transcription	Myb-like DNA-binding domain	Transcription factor MYB48 OS=Arabidopsis thaliana OX=3702 GN=MYB48 PE=2 SV=1	--	--	transcription factor MYB48 isoform X1 [Populus trichocarpa]
gene-POPTR_010G059600	At1g60420	3.08874	2.91879	3.23715	14.1579	12.8721	13.6808	9.24721e-111	2.18362	up	[O]	Posttranslational modification, protein turnover, chaperones	Biological Process: cell redox homeostasis (GO:0045454);;	K17609|0.0e+00|pop:18102440|K17609 nucleoredoxin [EC:1.8.1.8] | (RefSeq) probable nucleoredoxin 1	--	[R]	General function prediction only	Thioredoxin-like	Probable nucleoredoxin 1 OS=Arabidopsis thaliana OX=3702 GN=At1g60420 PE=1 SV=1	O	Posttranslational modification, protein turnover, chaperones	probable nucleoredoxin 1 [Populus trichocarpa]
gene-POPTR_008G103300	WRKY48	0.280639	0.333735	0.318719	0.802622	0.865989	0.789436	1.67927e-07	1.40658	up	--	--	Molecular Function: transcription factor activity, sequence-specific DNA binding (GO:0003700);; Cellular Component: nucleus (GO:0005634);; Molecular Function: sequence-specific DNA binding (GO:0043565);;	K12835|5.0e-45|cmax:111493042|K12835 ATP-dependent RNA helicase DDX42 [EC:3.6.4.13] | (RefSeq) DEAD-box ATP-dependent RNA helicase 24 isoform X1	Spliceosome (ko03040)	--	--	WRKY DNA -binding domain	Probable WRKY transcription factor 48 OS=Arabidopsis thaliana OX=3702 GN=WRKY48 PE=2 SV=1	K	Transcription	probable WRKY transcription factor 48 isoform X1 [Populus trichocarpa]
gene-POPTR_001G416500	CXXS1	45.1275	39.5638	37.29	111.608	111.579	120.54	1.15083e-93	1.54289	up	[O]	Posttranslational modification, protein turnover, chaperones	Molecular Function: molecular_function (GO:0003674);; Molecular Function: protein disulfide isomerase activity (GO:0003756);; Molecular Function: catalytic activity (GO:0003824);; Molecular Function: thioredoxin-disulfide reductase activity (GO:0004791);; Cellular Component: cellular_component (GO:0005575);; Cellular Component: intracellular (GO:0005622);; Cellular Component: cell (GO:0005623);; …	K03671|1.9e-68|pop:18095889|K03671 thioredoxin 1 | (RefSeq) thioredoxin-like protein CXXS1	--	[O]	Posttranslational modification, protein turnover, chaperones	Thioredoxin	Thioredoxin-like protein CXXS1 OS=Arabidopsis thaliana OX=3702 GN=CXXS1 PE=2 SV=2	O	Posttranslational modification, protein turnover, chaperones	thioredoxin-like protein CXXS1 [Populus trichocarpa]
gene-POPTR_002G248900	OXI1	0.385485	0.658251	0.492229	2.91057	2.8484	2.70242	2.54327e-28	2.46043	up	[U]	Intracellular trafficking, secretion, and vesicular transport	Molecular Function: protein serine/threonine kinase activity (GO:0004674);; Molecular Function: ATP binding (GO:0005524);; Cellular Component: nucleus (GO:0005634);; Cellular Component: cytoplasm (GO:0005737);; Cellular Component: plasma membrane (GO:0005886);; Biological Process: protein phosphorylation (GO:0006468);;	K20714|2.8e-246|pop:7471178|K20714 serine/threonine-protein kinase OXI1 [EC:2.7.11.1] | (RefSeq) serine/threonine-protein kinase OXI1	MAPK signaling pathway - plant (ko04016)	[R]	General function prediction only	Protein kinase domain	Serine/threonine-protein kinase OXI1 OS=Arabidopsis thaliana OX=3702 GN=OXI1 PE=1 SV=1	T	Signal transduction mechanisms	serine/threonine-protein kinase OXI1 [Populus trichocarpa]
gene-POPTR_007G112600	RPT3	4.12384	3.91457	4.85906	17.6583	17.2413	17.4442	4.76581e-143	2.07015	up	--	--	Biological Process: protein ubiquitination (GO:0016567);;	--	--	--	--	NPH3 family	Root phototropism protein 3 OS=Arabidopsis thaliana OX=3702 GN=RPT3 PE=1 SV=2	S	Function unknown	root phototropism protein 3 [Populus trichocarpa]
gene-POPTR_006G054700	CHX20	0.092295	0.1272	0.076802	9.08085	8.97634	9.16637	1.56734e-163	6.39287	up	[T]	Signal transduction mechanisms	Biological Process: regulation of pH (GO:0006885);; Cellular Component: endomembrane system (GO:0012505);; Molecular Function: solute:proton antiporter activity (GO:0015299);; Biological Process: monovalent inorganic cation transport (GO:0015672);; Cellular Component: integral component of membrane (GO:0016021);;	--	--	[P]	Inorganic ion transport and metabolism	Sodium/hydrogen exchanger family	Cation/H(+) antiporter 20 OS=Arabidopsis thaliana OX=3702 GN=CHX20 PE=2 SV=1	P	Inorganic ion transport and metabolism	cation/H(+) antiporter 20 [Populus trichocarpa]
gene-POPTR_013G072200	--	20.7469	23.6576	22.3729	46.1489	46.2774	49.5883	9.25483e-42	1.13758	up	--	--	--	--	--	--	--	--	--	--	--	collagen alpha-1(XI) chain [Populus trichocarpa]
gene-POPTR_006G186400	--	2.47242	2.41348	2.88081	7.55402	6.59371	7.25391	3.06523e-09	1.47526	up	--	--	--	--	--	--	--	--	--	--	--	hypothetical protein POPTR_006G186400 [Populus trichocarpa]
gene-POPTR_013G027200	DMP3	2.17371	3.11362	2.54133	10.626	11.1236	11.1835	1.60893e-43	2.1016	up	--	--	Cellular Component: integral component of membrane (GO:0016021);;	--	--	--	--	Protein of unknown function (DUF679)	Protein DMP3 OS=Arabidopsis thaliana OX=3702 GN=DMP3 PE=2 SV=1	S	Function unknown	protein DMP10 [Populus trichocarpa]
gene-POPTR_013G064300	At3g03770	2.88559	2.73399	3.24379	27.4052	28.1094	28.2942	0	3.28852	up	[T]	Signal transduction mechanisms	Molecular Function: protein kinase activity (GO:0004672);; Molecular Function: ATP binding (GO:0005524);; Cellular Component: integral component of membrane (GO:0016021);;	K13435|1.7e-37|sly:101268866|K13435 serine/threonine-protein kinase Pto | (RefSeq) Pto; serine/threonine protein kinase Pto	Plant-pathogen interaction (ko04626)	--	--	Protein tyrosine and serine/threonine kinase	Probable inactive leucine-rich repeat receptor-like protein kinase At3g03770 OS=Arabidopsis thaliana OX=3702 GN=At3g03770 PE=1 SV=1	T	Signal transduction mechanisms	probable inactive leucine-rich repeat receptor-like protein kinase At3g03770 [Populus trichocarpa]
gene-POPTR_005G082000	TGA1	0.935116	0.933771	1.17965	5.24717	5.15324	4.96937	7.04e-91	2.37477	up	--	--	Molecular Function: transcription factor activity, sequence-specific DNA binding (GO:0003700);; Biological Process: transcription, DNA-templated (GO:0006351);; Molecular Function: sequence-specific DNA binding (GO:0043565);;	K14431|8.2e-205|pop:7486326|K14431 transcription factor TGA | (RefSeq) transcription factor TGA4 isoform X1	Plant hormone signal transduction (ko04075)	--	--	Seed dormancy control	Transcription factor TGA1 OS=Arabidopsis thaliana OX=3702 GN=TGA1 PE=1 SV=2	K	Transcription	transcription factor TGA1 isoform X2 [Populus trichocarpa]
gene-POPTR_008G088800	--	4.41995	5.09997	4.03227	11.1618	11.9801	12.7914	1.833e-29	1.44608	up	--	--	Biological Process: sphingoid catabolic process (GO:0046521);;	--	--	[S]	Function unknown	Protein of unknown function (DUF962)	--	S	Function unknown	uncharacterized endoplasmic reticulum membrane protein C16E8.02 [Populus trichocarpa]
gene-POPTR_018G150000	--	1.55113	1.34556	1.34229	3.12831	3.34898	3.46832	1.2487e-15	1.33452	up	--	--	Cellular Component: integral component of membrane (GO:0016021);;	--	--	--	--	CemA family	--	U	Intracellular trafficking, secretion, and vesicular transport	chloroplast envelope membrane protein isoform X1 [Populus trichocarpa]
gene-POPTR_003G158400	--	1.45644	1.36003	1.48423	3.11017	3.22732	2.98855	5.12948e-13	1.15648	up	[T]	Signal transduction mechanisms	--	--	--	--	--	Protein of unknown function (DUF1350)	--	S	Function unknown	uncharacterized protein LOC7465383 [Populus trichocarpa]
gene-POPTR_002G108400	BHLH93	10.9887	11.1612	11.3	30.3065	29.4597	29.1235	1.37408e-86	1.45973	up	--	--	Molecular Function: protein dimerization activity (GO:0046983);;	K16190|8.9e-12|bdi:100843665|K16190 glucuronokinase [EC:2.7.1.43] | (RefSeq) transcription factor TDR	Pentose and glucuronate interconversions (ko00040);; Ascorbate and aldarate metabolism (ko00053);; Amino sugar and nucleotide sugar metabolism (ko00520)	--	--	Helix-loop-helix DNA-binding domain	Transcription factor bHLH93 OS=Arabidopsis thaliana OX=3702 GN=BHLH93 PE=1 SV=1	K	Transcription	transcription factor bHLH93 [Populus trichocarpa]
gene-POPTR_012G084100	MYB86	1.78664	1.67279	1.60172	4.13378	3.89963	3.2714	7.40877e-13	1.19619	up	--	--	Molecular Function: transcription regulatory region sequence-specific DNA binding (GO:0000976);; Molecular Function: transcription factor activity, sequence-specific DNA binding (GO:0003700);; Cellular Component: nucleus (GO:0005634);; Biological Process: regulation of stomatal movement (GO:0010119);; Biological Process: cell differentiation (GO:0030154);; Molecular Function: sequence-specific DN…	K09422|3.8e-210|pop:7458049|K09422 transcription factor MYB, plant | (RefSeq) transcription factor MYB7	--	[K]	Transcription	Myb-like DNA-binding domain	Transcription factor MYB86 OS=Arabidopsis thaliana OX=3702 GN=MYB86 PE=2 SV=1	--	--	transcription factor MYB7 [Populus trichocarpa]
gene-POPTR_010G184700	MCA1	0.659751	1.12505	0.895763	3.16481	3.84956	3.36712	1.09751e-24	1.97001	up	--	--	Biological Process: cell surface receptor signaling pathway (GO:0007166);;	--	--	--	--	PLAC8 family	Protein MID1-COMPLEMENTING ACTIVITY 1 OS=Arabidopsis thaliana OX=3702 GN=MCA1 PE=1 SV=1	S	Function unknown	cell number regulator 13 isoform X1 [Populus trichocarpa]
gene-POPTR_001G074100	PUP4	0.070135	0.237224	0.141543	1.46671	0.928073	1.20573	1.59055e-12	2.81623	up	--	--	Molecular Function: purine nucleoside transmembrane transporter activity (GO:0015211);; Cellular Component: integral component of membrane (GO:0016021);;	--	--	--	--	Purine nucleobase transmembrane transport	Probable purine permease 4 OS=Arabidopsis thaliana OX=3702 GN=PUP4 PE=2 SV=1	S	Function unknown	probable purine permease 4 [Populus trichocarpa]
gene-POPTR_005G141400	WRKY7	2.66761	2.83558	2.67226	6.17608	5.86134	6.84858	1.64361e-20	1.25079	up	--	--	Molecular Function: transcription factor activity, sequence-specific DNA binding (GO:0003700);; Cellular Component: nucleus (GO:0005634);; Molecular Function: sequence-specific DNA binding (GO:0043565);;	K13425|9.7e-24|han:110922953|K13425 WRKY transcription factor 22 | (RefSeq) WRKY transcription factor 22-like	MAPK signaling pathway - plant (ko04016);; Plant-pathogen interaction (ko04626)	--	--	WRKY DNA -binding domain	Probable WRKY transcription factor 7 OS=Arabidopsis thaliana OX=3702 GN=WRKY7 PE=1 SV=1	K	Transcription	probable WRKY transcription factor 7 isoform X2 [Populus trichocarpa]
gene-POPTR_012G113700	--	4.45162	3.69418	3.95132	8.3749	8.27706	7.00788	2.19719e-18	1.01418	up	--	--	--	--	--	[S]	Function unknown	Tim17/Tim22/Tim23/Pmp24 family	--	S	Function unknown	uncharacterized protein LOC18103849 [Populus trichocarpa]
gene-POPTR_002G032200	AMAT	2.20348	1.96286	1.79047	19.476	17.4496	18.181	5.20034e-186	3.24244	up	--	--	Molecular Function: transferase activity, transferring acyl groups other than amino-acyl groups (GO:0016747);;	K15400|1.7e-49|cam:101489322|K15400 omega-hydroxypalmitate O-feruloyl transferase [EC:2.3.1.188] | (RefSeq) omega-hydroxypalmitate O-feruloyl transferase	Cutin, suberine and wax biosynthesis (ko00073)	--	--	Transferase family	Methanol O-anthraniloyltransferase OS=Vitis labrusca OX=103355 GN=AMAT PE=1 SV=1	S	Function unknown	hypothetical protein POPTR_002G032200 [Populus trichocarpa]
gene-POPTR_015G050500	TCP12	2.08191	1.98553	1.99272	4.12647	4.7828	5.58122	2.83638e-15	1.28973	up	--	--	Molecular Function: transcription factor activity, sequence-specific DNA binding (GO:0003700);; Cellular Component: nucleus (GO:0005634);; Molecular Function: sequence-specific DNA binding (GO:0043565);; Biological Process: regulation of shoot system development (GO:0048831);; Biological Process: regulation of secondary shoot formation (GO:2000032);;	--	--	--	--	TCP family transcription factor	Transcription factor TCP12 OS=Arabidopsis thaliana OX=3702 GN=TCP12 PE=2 SV=1	K	Transcription	transcription factor TCP12 [Populus trichocarpa]
gene-POPTR_014G109700	FIP1	10.26	9.88286	11.7674	22.6719	22.2593	18.908	3.57437e-27	1.05153	up	--	--	--	--	--	--	--	GRAM domain	GEM-like protein 1 OS=Arabidopsis thaliana OX=3702 GN=FIP1 PE=1 SV=1	S	Function unknown	GEM-like protein 1 [Populus trichocarpa]
gene-POPTR_001G087100	TRE1	1.04527	1.34939	1.4834	3.38829	3.91835	3.38474	2.09268e-24	1.49623	up	[G]	Carbohydrate transport and metabolism	Molecular Function: alpha,alpha-trehalase activity (GO:0004555);; Biological Process: trehalose metabolic process (GO:0005991);;	K01194|1.5e-264|pop:7467057|K01194 alpha,alpha-trehalase [EC:3.2.1.28] | (RefSeq) trehalase	Starch and sucrose metabolism (ko00500)	[G]	Carbohydrate transport and metabolism	Trehalase	Trehalase OS=Arabidopsis thaliana OX=3702 GN=TRE1 PE=2 SV=1	G	Carbohydrate transport and metabolism	hypothetical protein POPTR_001G087100 [Populus trichocarpa]
gene-POPTR_009G067700	PYD2	9.16232	9.01454	9.55384	19.599	19.3499	18.7671	5.69951e-68	1.10852	up	[F]	Nucleotide transport and metabolism	Molecular Function: dihydropyrimidinase activity (GO:0004157);; Cellular Component: cytosol (GO:0005829);; Biological Process: pyrimidine nucleobase catabolic process (GO:0006208);; Molecular Function: hydrolase activity, acting on carbon-nitrogen (but not peptide) bonds, in cyclic amides (GO:0016812);;	K01464|1.3e-304|pop:7454881|K01464 dihydropyrimidinase [EC:3.5.2.2] | (RefSeq) dihydropyrimidinase	Pyrimidine metabolism (ko00240);; beta-Alanine metabolism (ko00410);; Pantothenate and CoA biosynthesis (ko00770)	[F]	Nucleotide transport and metabolism	Amidohydrolase family	Dihydropyrimidinase OS=Arabidopsis thaliana OX=3702 GN=PYD2 PE=1 SV=1	F	Nucleotide transport and metabolism	dihydropyrimidinase [Populus trichocarpa]
gene-POPTR_004G114800	At3g02290	5.97263	5.91937	6.03041	14.879	14.4217	14.5626	2.64891e-45	1.32709	up	--	--	Molecular Function: ubiquitin-protein transferase activity (GO:0004842);; Molecular Function: zinc ion binding (GO:0008270);;	K22378|1.9e-15|bna:106440523|K22378 E3 ubiquitin-protein ligase RNF181 [EC:2.3.2.27] | (RefSeq) E3 ubiquitin-protein ligase At3g02290-like	--	[O]	Posttranslational modification, protein turnover, chaperones	RING-H2 zinc finger domain	E3 ubiquitin-protein ligase At3g02290 OS=Arabidopsis thaliana OX=3702 GN=At3g02290 PE=2 SV=1	O	Posttranslational modification, protein turnover, chaperones	E3 ubiquitin-protein ligase At3g02290 [Populus trichocarpa]
gene-POPTR_003G007700	ARP2	7.28144	5.9325	6.79718	14.3364	14.1613	13.5519	2.09012e-39	1.12083	up	[J]	Translation, ribosomal structure and biogenesis	Biological Process: ribosomal large subunit assembly (GO:0000027);; Molecular Function: RNA binding (GO:0003723);; Molecular Function: structural constituent of ribosome (GO:0003735);; Biological Process: translation (GO:0006412);; Cellular Component: cytosolic large ribosomal subunit (GO:0022625);;	K02925|6.1e-227|pop:18111169|K02925 large subunit ribosomal protein L3e | (RefSeq) 60S ribosomal protein L3-2 isoform X1	Ribosome (ko03010)	[J]	Translation, ribosomal structure and biogenesis	Ribosomal protein L3	60S ribosomal protein L3-2 OS=Arabidopsis thaliana OX=3702 GN=ARP2 PE=2 SV=4	J	Translation, ribosomal structure and biogenesis	60S ribosomal protein L3-2 isoform X1 [Populus trichocarpa]
gene-POPTR_018G130000	ETN8	0.147329	0.271306	0.279887	3.01003	3.2801	2.97668	1.68539e-57	3.70073	up	--	--	Molecular Function: nucleoside transmembrane transporter activity (GO:0005337);; Cellular Component: plasma membrane (GO:0005886);; Cellular Component: integral component of membrane (GO:0016021);;	K15014|3.7e-227|pop:7470092|K15014 solute carrier family 29 (equilibrative nucleoside transporter), member 1/2/3 | (RefSeq) equilibrative nucleotide transporter 8	--	[F]	Nucleotide transport and metabolism	Nucleoside transporter	Equilibrative nucleotide transporter 8 OS=Arabidopsis thaliana OX=3702 GN=ETN8 PE=2 SV=1	F	Nucleotide transport and metabolism	equilibrative nucleotide transporter 8 [Populus trichocarpa]
gene-POPTR_010G240401	--	32.4689	31.6989	24.5125	58.392	59.4587	81.9421	2.70698e-16	1.2107	up	--	--	Cellular Component: mitochondrion (GO:0005739);; Biological Process: negative regulation of ATPase activity (GO:0032780);; Molecular Function: ATPase inhibitor activity (GO:0042030);;	K22255|8.8e-30|pop:7469527|K22255 ATPase inhibitor, mitochondrial | (RefSeq) uncharacterized protein At2g27730, mitochondrial	--	--	--	Mitochondrial ATPase inhibitor, IATP	--	S	Function unknown	uncharacterized protein At2g27730, mitochondrial [Populus trichocarpa]
gene-POPTR_006G178200	--	0.574306	1.09628	0.639415	13.5148	13.3289	10.5093	6.96689e-72	3.96815	up	--	--	--	--	--	--	--	--	--	--	--	putative glycine-rich cell wall structural protein 1 [Populus trichocarpa]
gene-POPTR_014G192100	--	0.641386	0.590353	0.296292	2.4451	2.36561	2.86527	1.09144e-15	2.28053	up	--	--	--	--	--	--	--	--	--	--	--	hypothetical protein POPTR_014G192100 [Populus trichocarpa]
gene-POPTR_007G047500	IRX14	16.43	14.9966	17.6331	36.0361	33.7594	32.1986	5.25876e-59	1.10785	up	--	--	Cellular Component: Golgi membrane (GO:0000139);; Biological Process: carbohydrate metabolic process (GO:0005975);; Biological Process: plant-type secondary cell wall biogenesis (GO:0009834);; Biological Process: glucuronoxylan biosynthetic process (GO:0010417);; Molecular Function: galactosylgalactosylxylosylprotein 3-beta-glucuronosyltransferase activity (GO:0015018);; Cellular Component: integ…	K20871|1.7e-290|pop:7462594|K20871 putative beta-1,4-xylosyltransferase IRX14 [EC:2.4.2.-] | (RefSeq) probable beta-1,4-xylosyltransferase IRX14	--	[O]	Posttranslational modification, protein turnover, chaperones	Glycosyltransferase family 43	Beta-1,4-xylosyltransferase IRX14 OS=Arabidopsis thaliana OX=3702 GN=IRX14 PE=1 SV=1	O	Posttranslational modification, protein turnover, chaperones	probable beta-1,4-xylosyltransferase IRX14 [Populus trichocarpa]
gene-POPTR_019G067500	NPF4.4	7.46421	7.4177	8.13793	17.9986	18.9602	16.5386	2.22844e-65	1.26774	up	[E]	Amino acid transport and metabolism	Molecular Function: peptide:proton symporter activity (GO:0015333);; Cellular Component: integral component of membrane (GO:0016021);; Molecular Function: oligopeptide transmembrane transporter activity (GO:0035673);; Molecular Function: peptide transmembrane transporter activity (GO:1904680);;	K14638|4.7e-125|oeu:111408819|K14638 solute carrier family 15 (peptide/histidine transporter), member 3/4 | (RefSeq) protein NRT1/ PTR FAMILY 4.5-like	--	[E]	Amino acid transport and metabolism	POT family	Protein NRT1/ PTR FAMILY 4.4 OS=Arabidopsis thaliana OX=3702 GN=NPF4.4 PE=2 SV=1	E	Amino acid transport and metabolism	protein NRT1/ PTR FAMILY 4.4 [Populus trichocarpa]
gene-POPTR_T060700	RGA2	0.666777	0.710662	0.84099	1.39536	1.83477	1.79927	2.43797e-09	1.21227	up	[R]	General function prediction only	Biological Process: defense response (GO:0006952);; Molecular Function: ADP binding (GO:0043531);;	K15078|6.5e-99|tcc:18614561|K15078 structure-specific endonuclease subunit SLX1 [EC:3.6.1.-] | (RefSeq) putative disease resistance protein RGA3	--	[T]	Signal transduction mechanisms	NB-ARC domain	Disease resistance protein RGA2 OS=Solanum bulbocastanum OX=147425 GN=RGA2 PE=1 SV=1	T	Signal transduction mechanisms	disease resistance protein RGA2-like [Populus trichocarpa]
gene-POPTR_005G216800	--	2.22395	1.9765	2.49482	5.84961	5.75826	6.14911	1.1798e-12	1.43417	up	--	--	Cellular Component: integral component of membrane (GO:0016021);;	--	--	--	--	--	--	--	--	hypothetical protein POPTR_005G216800 [Populus trichocarpa]
gene-POPTR_011G139400	--	0.425173	0.625574	0.339589	1.89893	2.00934	1.56054	2.81882e-08	1.91638	up	--	--	--	--	--	--	--	--	--	--	--	uncharacterized protein LOC7470957 [Populus trichocarpa]
gene-POPTR_003G141800	At5g39865	1.46298	1.593	1.98873	6.83286	4.96047	7.09853	1.09072e-30	1.93715	up	--	--	Molecular Function: electron carrier activity (GO:0009055);; Molecular Function: protein disulfide oxidoreductase activity (GO:0015035);;	K17479|8.3e-210|pop:7497858|K17479 glutaredoxin domain-containing cysteine-rich protein 1 | (RefSeq) glutaredoxin domain-containing cysteine-rich protein 1	--	[O]	Posttranslational modification, protein turnover, chaperones	Glutaredoxin	Uncharacterized protein At5g39865 OS=Arabidopsis thaliana OX=3702 GN=At5g39865 PE=2 SV=1	O	Posttranslational modification, protein turnover, chaperones	glutaredoxin domain-containing cysteine-rich protein 1 [Populus trichocarpa]
gene-POPTR_002G124900	RID3	2.09955	2.17656	1.49157	4.18542	5.10874	4.01827	2.77875e-09	1.23242	up	--	--	Cellular Component: nuclear pre-replicative complex (GO:0005656);; Biological Process: rRNA processing (GO:0006364);; Biological Process: regulation of DNA-dependent DNA replication initiation (GO:0030174);; Cellular Component: Rix1 complex (GO:0097344);;	K14829|1.2e-133|pop:18104875|K14829 pre-rRNA-processing protein IPI3 | (RefSeq) protein ROOT INITIATION DEFECTIVE 3 isoform X1	--	[R]	General function prediction only	--	Protein ROOT INITIATION DEFECTIVE 3 OS=Arabidopsis thaliana OX=3702 GN=RID3 PE=1 SV=1	S	Function unknown	hypothetical protein POPTR_002G124900 [Populus trichocarpa]
gene-POPTR_007G088700	SULTR2;1	0.476945	0.231346	0.434851	1.68553	1.44925	1.17613	9.43639e-11	1.9006	up	[P]	Inorganic ion transport and metabolism	Cellular Component: integral component of plasma membrane (GO:0005887);; Molecular Function: secondary active sulfate transmembrane transporter activity (GO:0008271);; Molecular Function: anion:anion antiporter activity (GO:0015301);;	K17469|0.0e+00|pop:112328192|K17469 sulfate transporter 2, low-affinity | (RefSeq) sulfate transporter 2.1-like	--	[P]	Inorganic ion transport and metabolism	Sulfate permease family	Sulfate transporter 2.1 OS=Arabidopsis thaliana OX=3702 GN=SULTR2;1 PE=2 SV=1	P	Inorganic ion transport and metabolism	hypothetical protein POPTR_007G088700 [Populus trichocarpa]
gene-POPTR_011G018400	ITN1	0.327377	0.342608	0.287835	6.48323	6.13584	5.41131	2.12008e-105	4.21341	up	--	--	Cellular Component: membrane (GO:0016020);; Cellular Component: integral component of membrane (GO:0016021);;	K00895|6.9e-236|hbr:110656716|K00895 diphosphate-dependent phosphofructokinase [EC:2.7.1.90] | (RefSeq) LOW QUALITY PROTEIN: uncharacterized protein LOC110656716	Glycolysis / Gluconeogenesis (ko00010);; Pentose phosphate pathway (ko00030);; Fructose and mannose metabolism (ko00051)	[R]	General function prediction only	Domain of unknown function	Ankyrin repeat-containing protein ITN1 OS=Arabidopsis thaliana OX=3702 GN=ITN1 PE=1 SV=1	L	Replication, recombination and repair	ankyrin repeat-containing protein ITN1 [Populus trichocarpa]
gene-POPTR_009G132200	PR5K	5.86064	5.93985	6.24383	14.4537	14.6638	13.3181	4.52372e-53	1.29097	up	--	--	Cellular Component: integral component of membrane (GO:0016021);;	K12173|6.3e-53|gmx:100794341|K12173 BRCA1-A complex subunit BRE | (RefSeq) BRISC and BRCA1-A complex member 2	Homologous recombination (ko03440)	--	--	Thaumatin family	PR5-like receptor kinase OS=Arabidopsis thaliana OX=3702 GN=PR5K PE=1 SV=1	T	Signal transduction mechanisms	thaumatin-like protein 1b isoform X1 [Populus trichocarpa]
gene-POPTR_013G156000	CIPK10	10.7574	10.8687	11.5213	38.1123	38.7023	38.8631	4.03534e-208	1.85333	up	[T]	Signal transduction mechanisms	Molecular Function: protein serine/threonine kinase activity (GO:0004674);; Molecular Function: ATP binding (GO:0005524);; Biological Process: signal transduction (GO:0007165);;	K07198|1.4e-195|nnu:104593799|K07198 5'-AMP-activated protein kinase, catalytic alpha subunit [EC:2.7.11.11] | (RefSeq) CBL-interacting protein kinase 18-like	--	[T]	Signal transduction mechanisms	Protein kinase domain	CBL-interacting serine/threonine-protein kinase 10 OS=Arabidopsis thaliana OX=3702 GN=CIPK10 PE=1 SV=1	T	Signal transduction mechanisms	CBL-interacting serine/threonine-protein kinase 10 [Populus trichocarpa]
gene-POPTR_009G114400	--	0.309607	0.10715	0.255257	6.7928	6.93269	6.61839	1.24914e-48	4.70223	up	--	--	--	--	--	[D]	Cell cycle control, cell division, chromosome partitioning	Organ specific protein	--	D	Cell cycle control, cell division, chromosome partitioning	uncharacterized protein LOC7464037 [Populus trichocarpa]
gene-POPTR_009G149000	--	1.71246	1.43357	1.72924	6.22897	4.92305	5.27873	1.7226e-25	1.7831	up	--	--	--	--	--	--	--	--	--	--	--	hypothetical protein POPTR_009G149000 [Populus trichocarpa]
gene-POPTR_003G192900	At5g40230	12.1894	9.82368	10.7284	56.8908	54.1371	52.3375	2.67109e-202	2.35748	up	--	--	Cellular Component: integral component of membrane (GO:0016021);; Molecular Function: transmembrane transporter activity (GO:0022857);;	--	--	--	--	EamA-like transporter family	WAT1-related protein At5g40230 OS=Arabidopsis thaliana OX=3702 GN=At5g40230 PE=3 SV=1	S	Function unknown	WAT1-related protein At3g28050 [Populus trichocarpa]
gene-POPTR_007G121100	MIP1A	0	0	0.07407	1.55827	1.39326	1.29702	6.83124e-22	5.12087	up	--	--	Molecular Function: zinc ion binding (GO:0008270);;	--	--	--	--	--	B-box domain protein 30 OS=Arabidopsis thaliana OX=3702 GN=MIP1A PE=1 SV=1	S	Function unknown	hypothetical protein POPTR_007G121100 [Populus trichocarpa]
gene-POPTR_013G135700	--	0.206514	0.245759	0.200075	6.28387	7.1534	6.33075	1.53023e-130	4.88151	up	--	--	Biological Process: protein localization (GO:0008104);; Biological Process: protein transport (GO:0015031);;	K19476|0.0e+00|pop:7494419|K19476 vacuolar protein sorting-associated protein IST1 | (RefSeq) uncharacterized protein LOC7494419	Endocytosis (ko04144)	[Z]	Cytoskeleton	Regulator of Vps4 activity in the MVB pathway	--	Z	Cytoskeleton	uncharacterized protein LOC7494419 [Populus trichocarpa]
gene-POPTR_010G113100	--	0.458656	0.397902	0.348089	1.42625	1.60404	2.32775	4.80458e-08	2.05065	up	--	--	Cellular Component: integral component of membrane (GO:0016021);;	--	--	--	--	--	--	--	--	hypothetical protein POPTR_010G113100 [Populus trichocarpa]
gene-POPTR_010G132300	PHO1-H1	2.26598	2.36136	3.23017	11.091	10.2863	10.6828	6.81159e-82	2.07278	up	--	--	Cellular Component: integral component of membrane (GO:0016021);;	K24195|0.0e+00|pop:7466931|K24195 xenotropic and polytropic retrovirus receptor 1 | (RefSeq) phosphate transporter PHO1 homolog 1	--	[U]	Intracellular trafficking, secretion, and vesicular transport	EXS family	Phosphate transporter PHO1 homolog 1 OS=Arabidopsis thaliana OX=3702 GN=PHO1-H1 PE=2 SV=1	U	Intracellular trafficking, secretion, and vesicular transport	phosphate transporter PHO1 homolog 1 [Populus trichocarpa]
gene-POPTR_017G133200	MAP2B	1.14471	0.759434	0.953536	1.76587	2.1057	2.12219	2.9767e-07	1.10018	up	[J]	Translation, ribosomal structure and biogenesis	Cellular Component: cytoplasm (GO:0005737);; Molecular Function: metal ion binding (GO:0046872);; Molecular Function: metalloaminopeptidase activity (GO:0070006);; Biological Process: protein initiator methionine removal (GO:0070084);;	K01265|8.6e-238|pop:18106609|K01265 methionyl aminopeptidase [EC:3.4.11.18] | (RefSeq) methionine aminopeptidase 2B isoform X1	--	[R]	General function prediction only	Metallopeptidase family M24	Methionine aminopeptidase 2B OS=Arabidopsis thaliana OX=3702 GN=MAP2B PE=2 SV=2	J	Translation, ribosomal structure and biogenesis	methionine aminopeptidase 2B isoform X1 [Populus trichocarpa]
gene-POPTR_010G135200	BZIP43	1.75164	1.84396	1.80421	8.87098	11.4801	12.6783	8.32359e-47	2.62406	up	--	--	Molecular Function: transcription factor activity, sequence-specific DNA binding (GO:0003700);;	K09060|8.5e-07|mesc:110601836|K09060 plant G-box-binding factor | (RefSeq) bZIP transcription factor 16-like isoform X1	--	--	--	bZIP transcription factor	Basic leucine zipper 43 OS=Arabidopsis thaliana OX=3702 GN=BZIP43 PE=1 SV=1	K	Transcription	basic leucine zipper 43 [Populus trichocarpa]
gene-POPTR_002G125800	IRE4	6.29355	6.08494	6.78424	14.0549	14.0693	13.2026	1.32468e-48	1.15917	up	[T]	Signal transduction mechanisms	Molecular Function: protein serine/threonine kinase activity (GO:0004674);; Molecular Function: ATP binding (GO:0005524);; Biological Process: peptidyl-serine phosphorylation (GO:0018105);; Biological Process: intracellular signal transduction (GO:0035556);;	K08790|8.8e-306|pop:7472689|K08790 serine/threonine kinase 38 [EC:2.7.11.1] | (RefSeq) serine/threonine-protein kinase tricorner	--	[R]	General function prediction only	Protein kinase domain	Probable serine/threonine protein kinase IRE4 OS=Arabidopsis thaliana OX=3702 GN=IRE4 PE=2 SV=1	T	Signal transduction mechanisms	serine/threonine-protein kinase tricorner [Populus trichocarpa]
gene-POPTR_014G052700	PBL19	2.92093	2.32227	2.24821	5.45254	5.67849	6.32463	1.4043e-27	1.23995	up	[T]	Signal transduction mechanisms	Molecular Function: protein kinase activity (GO:0004672);; Molecular Function: ATP binding (GO:0005524);;	K00924|1.9e-141|qsu:112032229|K00924 kinase [EC:2.7.1.-] | (RefSeq) probable serine/threonine-protein kinase PBL19	--	[T]	Signal transduction mechanisms	Protein kinase domain	Probable serine/threonine-protein kinase PBL19 OS=Arabidopsis thaliana OX=3702 GN=PBL19 PE=1 SV=1	T	Signal transduction mechanisms	hypothetical protein POPTR_014G052700 [Populus trichocarpa]
gene-POPTR_008G069300	At5g05600	0.720656	0.549394	0.676303	4.12037	4.85553	4.18276	4.52865e-71	2.78522	up	[Q]	Secondary metabolites biosynthesis, transport and catabolism	Molecular Function: metal ion binding (GO:0046872);; Molecular Function: dioxygenase activity (GO:0051213);;	K05277|3.7e-69|pda:103696959|K05277 anthocyanidin synthase [EC:1.14.20.4] | (RefSeq) leucoanthocyanidin dioxygenase-like	Flavonoid biosynthesis (ko00941)	[QR]	Secondary metabolites biosynthesis, transport and catabolism;; General function prediction only	non-haem dioxygenase in morphine synthesis N-terminal	Probable 2-oxoglutarate-dependent dioxygenase At5g05600 OS=Arabidopsis thaliana OX=3702 GN=At5g05600 PE=2 SV=1	Q	Secondary metabolites biosynthesis, transport and catabolism	probable 2-oxoglutarate-dependent dioxygenase At5g05600 isoform X1 [Populus trichocarpa]
gene-POPTR_006G021600	--	10.8408	11.3689	8.60539	20.5051	19.4828	25.5291	3.96093e-16	1.13001	up	--	--	Cellular Component: plasma membrane (GO:0005886);;	--	--	--	--	Cysteine-rich TM module stress tolerance	--	S	Function unknown	hypothetical protein POPTR_006G021600 [Populus trichocarpa]
gene-POPTR_014G134000	GRXS6	0.130429	0.231697	0.245107	3.42842	3.07406	2.3223	2.20062e-19	3.59361	up	--	--	Molecular Function: arsenate reductase (glutaredoxin) activity (GO:0008794);; Molecular Function: electron carrier activity (GO:0009055);; Molecular Function: protein disulfide oxidoreductase activity (GO:0015035);;	K03676|2.1e-49|pop:18111306|K03676 glutaredoxin 3 | (RefSeq) monothiol glutaredoxin-S6	--	[O]	Posttranslational modification, protein turnover, chaperones	Glutaredoxin	Monothiol glutaredoxin-S6 OS=Arabidopsis thaliana OX=3702 GN=GRXS6 PE=3 SV=1	O	Posttranslational modification, protein turnover, chaperones	monothiol glutaredoxin-S6 [Populus trichocarpa]
gene-POPTR_012G042300	TMN4	2.38793	1.90793	2.57023	4.65063	4.78582	5.41063	8.20609e-16	1.15587	up	--	--	Cellular Component: integral component of membrane (GO:0016021);;	K17085|7.2e-240|nsy:104224503|K17085 transmembrane 9 superfamily member 1 | (RefSeq) putative phagocytic receptor 1b	--	[U]	Intracellular trafficking, secretion, and vesicular transport	Endomembrane protein 70	Transmembrane 9 superfamily member 4 OS=Arabidopsis thaliana OX=3702 GN=TMN4 PE=2 SV=1	U	Intracellular trafficking, secretion, and vesicular transport	transmembrane 9 superfamily member 2 isoform X1 [Populus trichocarpa]
gene-POPTR_008G019900	--	0.167763	0.313007	0.246391	5.17169	5.47044	6.53156	3.39136e-41	4.37736	up	--	--	--	--	--	--	--	--	--	--	--	uncharacterized protein LOC7486906 [Populus trichocarpa]
gene-POPTR_004G200100	--	6.93391	6.65356	7.62926	31.0745	29.2451	26.3158	3.2771e-109	2.07582	up	[IQR]	Lipid transport and metabolism;; Secondary metabolites biosynthesis, transport and catabolism;; General function prediction only	Molecular Function: oxidoreductase activity (GO:0016491);;	K13070|2.1e-72|dosa:Os04t0179200-01|K13070 momilactone-A synthase [EC:1.1.1.295] | (RefSeq) Os04g0179200, MAS, MOMILACTONE_A_SYNTHASE; Similar to Stem secoisolariciresinol dehydrogenase (Fragment).	Diterpenoid biosynthesis (ko00904)	[R]	General function prediction only	Enoyl-(Acyl carrier protein) reductase	Secoisolariciresinol dehydrogenase (Fragment) OS=Forsythia intermedia OX=55183 PE=1 SV=1	Q	Secondary metabolites biosynthesis, transport and catabolism	secoisolariciresinol dehydrogenase [Populus trichocarpa]
gene-POPTR_001G068100	IRX10	7.05346	5.87132	6.87299	17.9756	17.176	16.2185	2.39571e-56	1.42345	up	--	--	Biological Process: protein glycosylation (GO:0006486);; Molecular Function: transferase activity, transferring glycosyl groups (GO:0016757);;	K20870|3.8e-251|pop:7491436|K20870 putative beta-1,4-xylosyltransferase IRX10 [EC:2.4.2.-] | (RefSeq) probable beta-1,4-xylosyltransferase IRX10	--	[GMW]	Carbohydrate transport and metabolism;; Cell wall/membrane/envelope biogenesis;; Extracellular structures	Exostosin family	Probable beta-1,4-xylosyltransferase IRX10 OS=Arabidopsis thaliana OX=3702 GN=IRX10 PE=2 SV=1	--	--	probable beta-1,4-xylosyltransferase IRX10 [Populus trichocarpa]
gene-POPTR_008G154800	--	1.75821	1.96716	1.71838	6.2975	7.18841	7.07454	6.13189e-16	1.92508	up	[JO]	Translation, ribosomal structure and biogenesis;; Posttranslational modification, protein turnover, chaperones	Molecular Function: N-acetyltransferase activity (GO:0008080);;	--	--	--	--	Acetyltransferase (GNAT) domain	--	J	Translation, ribosomal structure and biogenesis	hypothetical protein POPTR_008G154800, partial [Populus trichocarpa]
gene-POPTR_008G110800	PHO1-H1	0.930728	0.732177	0.934324	5.49438	5.67289	5.21959	2.49582e-102	2.69403	up	--	--	Molecular Function: inositol hexakisphosphate binding (GO:0000822);; Cellular Component: cytoplasm (GO:0005737);; Cellular Component: Golgi apparatus (GO:0005794);; Cellular Component: plasma membrane (GO:0005886);; Biological Process: phosphate ion transport (GO:0006817);; Molecular Function: phosphate ion transmembrane transporter activity (GO:0015114);; Cellular Component: integral component o…	K24195|0.0e+00|pop:7466931|K24195 xenotropic and polytropic retrovirus receptor 1 | (RefSeq) phosphate transporter PHO1 homolog 1	--	[U]	Intracellular trafficking, secretion, and vesicular transport	EXS family	Phosphate transporter PHO1 homolog 1 OS=Arabidopsis thaliana OX=3702 GN=PHO1-H1 PE=2 SV=1	U	Intracellular trafficking, secretion, and vesicular transport	phosphate transporter PHO1 homolog 1 [Populus trichocarpa]
gene-POPTR_T094400	COL5	2.00213	2.45104	2.96156	13.2224	12.3451	12.2253	9.35587e-95	2.39396	up	--	--	Cellular Component: nucleus (GO:0005634);; Molecular Function: zinc ion binding (GO:0008270);; Biological Process: regulation of flower development (GO:0009909);;	K12135|2.0e-33|thj:104802991|K12135 zinc finger protein CONSTANS | (RefSeq) zinc finger protein CONSTANS-LIKE 2-like	Circadian rhythm - plant (ko04712)	[K]	Transcription	CCT motif	Zinc finger protein CONSTANS-LIKE 5 OS=Arabidopsis thaliana OX=3702 GN=COL5 PE=2 SV=2	K	Transcription	zinc finger protein CONSTANS-LIKE 5 [Populus trichocarpa]
gene-POPTR_T093600	PR-1	0.080701	0.069832	0.127869	0.901888	1.33793	1.12588	1.49907e-08	2.19862	up	[S]	Function unknown	Cellular Component: extracellular region (GO:0005576);;	K13449|1.8e-35|egu:105031941|K13449 pathogenesis-related protein 1 | (RefSeq) pathogenesis-related protein PRB1-3-like	MAPK signaling pathway - plant (ko04016);; Plant hormone signal transduction (ko04075);; Plant-pathogen interaction (ko04626)	[S]	Function unknown	Cysteine-rich secretory protein family	Pathogenesis-related protein PR-1 OS=Medicago truncatula OX=3880 GN=PR-1 PE=2 SV=1	S	Function unknown	hypothetical protein POPTR_T093600 [Populus trichocarpa]
gene-POPTR_001G410400	GH3.6	12.9444	11.8618	12.302	25.8035	23.9032	27.6558	2.50219e-47	1.10962	up	[IQ]	Lipid transport and metabolism;; Secondary metabolites biosynthesis, transport and catabolism	Cellular Component: cytoplasm (GO:0005737);; Molecular Function: indole-3-acetic acid amido synthetase activity (GO:0010279);; Molecular Function: acid-amino acid ligase activity (GO:0016881);;	K14487|0.0e+00|pop:18095866|K14487 auxin responsive GH3 gene family | (RefSeq) indole-3-acetic acid-amido synthetase GH3.6	Plant hormone signal transduction (ko04075)	--	--	GH3 auxin-responsive promoter	Indole-3-acetic acid-amido synthetase GH3.6 OS=Arabidopsis thaliana OX=3702 GN=GH3.6 PE=1 SV=1	S	Function unknown	indole-3-acetic acid-amido synthetase GH3.6 [Populus trichocarpa]
gene-POPTR_013G009700	CKI1	2.67547	2.82967	2.36418	6.89694	9.20647	7.22688	1.99674e-45	1.60901	up	[T]	Signal transduction mechanisms	Molecular Function: phosphorelay sensor kinase activity (GO:0000155);; Cellular Component: integral component of membrane (GO:0016021);;	K14489|8.6e-37|csat:104774020|K14489 arabidopsis histidine kinase 2/3/4 (cytokinin receptor) [EC:2.7.13.3] | (RefSeq) histidine kinase 4-like	Plant hormone signal transduction (ko04075)	[T]	Signal transduction mechanisms	Histidine kinase-, DNA gyrase B-, and HSP90-like ATPase	Histidine kinase CKI1 OS=Arabidopsis thaliana OX=3702 GN=CKI1 PE=1 SV=1	T	Signal transduction mechanisms	histidine kinase CKI1 [Populus trichocarpa]
gene-POPTR_003G093700	SNL6	1.05773	0.922334	1.34709	2.18126	2.68136	2.25218	9.63466e-08	1.13469	up	[M]	Cell wall/membrane/envelope biogenesis	Molecular Function: 3-beta-hydroxy-delta5-steroid dehydrogenase activity (GO:0003854);; Biological Process: steroid biosynthetic process (GO:0006694);; Molecular Function: oxidoreductase activity (GO:0016491);; Molecular Function: oxidoreductase activity, acting on the CH-OH group of donors, NAD or NADP as acceptor (GO:0016616);;	K09753|1.4e-37|atr:18447024|K09753 cinnamoyl-CoA reductase [EC:1.2.1.44] | (RefSeq) cinnamoyl-CoA reductase 1	Phenylpropanoid biosynthesis (ko00940)	[V]	Defense mechanisms	3-beta hydroxysteroid dehydrogenase/isomerase family	Cinnamoyl-CoA reductase-like SNL6 OS=Oryza sativa subsp. japonica OX=39947 GN=SNL6 PE=3 SV=1	V	Defense mechanisms	cinnamoyl-CoA reductase-like SNL6 [Populus trichocarpa]
gene-POPTR_008G040900	--	1.40814	1.35117	1.36613	2.40434	3.25867	3.35984	3.46856e-07	1.15489	up	--	--	--	--	--	--	--	--	--	--	--	hypothetical protein POPTR_008G040900 [Populus trichocarpa]
gene-POPTR_003G138200	AS	9.66166	10.1262	10.0613	20.4825	19.8022	19.7954	4.08611e-51	1.06002	up	--	--	Molecular Function: UDP-glycosyltransferase activity (GO:0008194);; Cellular Component: intracellular membrane-bounded organelle (GO:0043231);;	K08237|2.5e-289|pop:7497836|K08237 hydroquinone glucosyltransferase [EC:2.4.1.218] | (RefSeq) hydroquinone glucosyltransferase	--	[GC]	Carbohydrate transport and metabolism;; Energy production and conversion	UDP-glucoronosyl and UDP-glucosyl transferase	Hydroquinone glucosyltransferase OS=Rauvolfia serpentina OX=4060 GN=AS PE=1 SV=1	--	--	hydroquinone glucosyltransferase [Populus trichocarpa]
gene-POPTR_004G149000	AOS3	0.551809	0.622466	0.791393	8.41619	8.94474	9.11498	1.41967e-128	3.76021	up	[QV]	Secondary metabolites biosynthesis, transport and catabolism;; Defense mechanisms	Molecular Function: monooxygenase activity (GO:0004497);; Molecular Function: iron ion binding (GO:0005506);; Biological Process: sterol metabolic process (GO:0016125);; Molecular Function: oxidoreductase activity (GO:0016491);; Molecular Function: oxidoreductase activity, acting on paired donors, with incorporation or reduction of molecular oxygen (GO:0016705);; Molecular Function: heme binding …	K01723|9.1e-281|pop:7480605|K01723 hydroperoxide dehydratase [EC:4.2.1.92] | (RefSeq) allene oxide synthase 3	alpha-Linolenic acid metabolism (ko00592)	--	--	Cytochrome P450	Allene oxide synthase 3 OS=Solanum lycopersicum OX=4081 GN=AOS3 PE=1 SV=1	Q	Secondary metabolites biosynthesis, transport and catabolism	allene oxide synthase 3 [Populus trichocarpa]
gene-POPTR_001G404800	At4g27190	0.604942	0.417734	0.549232	1.93646	1.81623	1.80129	6.02235e-28	1.84964	up	[K]	Transcription	Molecular Function: DNA binding (GO:0003677);; Molecular Function: ADP binding (GO:0043531);;	K13459|0.0e+00|pop:18095629|K13459 disease resistance protein RPS2 | (RefSeq) probable disease resistance protein At4g27220	Plant-pathogen interaction (ko04626)	[T]	Signal transduction mechanisms	NB-ARC domain	Disease resistance protein At4g27190 OS=Arabidopsis thaliana OX=3702 GN=At4g27190 PE=2 SV=1	T	Signal transduction mechanisms	probable disease resistance protein At4g27220 [Populus trichocarpa]
gene-POPTR_014G080900	PLIM2B	0.905057	1.11491	0.91977	2.89969	2.55624	3.21211	1.45561e-13	1.57087	up	--	--	Cellular Component: plasma membrane (GO:0005886);; Cellular Component: actin cytoskeleton (GO:0015629);; Molecular Function: metal ion binding (GO:0046872);; Molecular Function: actin filament binding (GO:0051015);; Biological Process: actin filament bundle assembly (GO:0051017);;	K09377|1.7e-90|pop:7461757|K09377 cysteine and glycine-rich protein | (RefSeq) LIM domain-containing protein PLIM2b	--	[TZ]	Signal transduction mechanisms;; Cytoskeleton	LIM domain	LIM domain-containing protein PLIM2b OS=Arabidopsis thaliana OX=3702 GN=PLIM2B PE=1 SV=1	--	--	LIM domain-containing protein PLIM2b [Populus trichocarpa]
gene-POPTR_008G122901	At5g38830	0.500894	0.432881	0.373849	0.645226	0.896694	1.09332	0.000816903	1.02463	up	[J]	Translation, ribosomal structure and biogenesis	Molecular Function: nucleotide binding (GO:0000166);; Molecular Function: molecular_function (GO:0003674);; Molecular Function: catalytic activity (GO:0003824);; Molecular Function: aminoacyl-tRNA ligase activity (GO:0004812);; Molecular Function: cysteine-tRNA ligase activity (GO:0004817);; Molecular Function: binding (GO:0005488);; Molecular Function: ATP binding (GO:0005524);; Cellular Compone…	K01883|2.9e-54|egr:104433268|K01883 cysteinyl-tRNA synthetase [EC:6.1.1.16] | (RefSeq) cysteine--tRNA ligase 2, cytoplasmic	Aminoacyl-tRNA biosynthesis (ko00970)	[J]	Translation, ribosomal structure and biogenesis	tRNA synthetases class I (C) catalytic domain	Cysteine--tRNA ligase 2, cytoplasmic OS=Arabidopsis thaliana OX=3702 GN=At5g38830 PE=2 SV=1	J	Translation, ribosomal structure and biogenesis	hypothetical protein POPTR_008G122901 [Populus trichocarpa]
gene-POPTR_011G128900	At4g27290	1.78177	2.09296	2.04807	7.56113	7.10306	7.17261	2.72571e-78	1.92608	up	[T]	Signal transduction mechanisms	Molecular Function: protein serine/threonine kinase activity (GO:0004674);; Molecular Function: ATP binding (GO:0005524);; Cellular Component: plasma membrane (GO:0005886);; Biological Process: protein phosphorylation (GO:0006468);; Cellular Component: integral component of membrane (GO:0016021);; Biological Process: recognition of pollen (GO:0048544);;	K24104|1.3e-74|thj:104799061|K24104 GPN-loop GTPase | (RefSeq) LOW QUALITY PROTEIN: uncharacterized protein LOC104799061	--	--	--	Protein tyrosine and serine/threonine kinase	G-type lectin S-receptor-like serine/threonine-protein kinase At4g27290 OS=Arabidopsis thaliana OX=3702 GN=At4g27290 PE=3 SV=4	T	Signal transduction mechanisms	G-type lectin S-receptor-like serine/threonine-protein kinase At4g27290 [Populus trichocarpa]
gene-POPTR_006G136700	SS	132.677	136.75	139.673	387.28	379.062	360.249	1.36722e-281	1.51381	up	[M]	Cell wall/membrane/envelope biogenesis	Biological Process: sucrose metabolic process (GO:0005985);; Molecular Function: sucrose synthase activity (GO:0016157);;	K00695|0.0e+00|pop:18100284|K00695 sucrose synthase [EC:2.4.1.13] | (RefSeq) sucrose synthase isoform X3	Starch and sucrose metabolism (ko00500)	[M]	Cell wall/membrane/envelope biogenesis	Sucrose synthase	Sucrose synthase OS=Glycine max OX=3847 GN=SS PE=1 SV=2	M	Cell wall/membrane/envelope biogenesis	sucrose synthase isoform X2 [Populus trichocarpa]
gene-POPTR_018G103900	CESA9	7.43746	6.73387	7.39848	41.3755	38.6683	40.8739	0	2.53642	up	[N]	Cell motility	Cellular Component: Golgi apparatus (GO:0005794);; Cellular Component: trans-Golgi network (GO:0005802);; Cellular Component: plasma membrane (GO:0005886);; Biological Process: plant-type primary cell wall biogenesis (GO:0009833);; Cellular Component: integral component of membrane (GO:0016021);; Molecular Function: cellulose synthase activity (GO:0016759);; Molecular Function: cellulose synthase…	K10999|0.0e+00|pop:7489430|K10999 cellulose synthase A [EC:2.4.1.12] | (RefSeq) cellulose synthase A catalytic subunit 7 [UDP-forming]	--	--	--	Cellulose synthase	Cellulose synthase A catalytic subunit 9 [UDP-forming] OS=Oryza sativa subsp. indica OX=39946 GN=CESA9 PE=2 SV=1	G	Carbohydrate transport and metabolism	hypothetical protein POPTR_018G103900 [Populus trichocarpa]
gene-POPTR_001G435400	--	0.83335	1.12902	0.683808	3.98564	3.14237	4.57632	7.23225e-14	2.12309	up	--	--	--	--	--	--	--	--	--	--	--	uncharacterized protein LOC7491370 [Populus trichocarpa]
gene-POPTR_002G259300	NPGR2	6.06893	6.00509	6.15844	11.9646	13.3623	11.8164	8.57741e-44	1.05756	up	--	--	Molecular Function: protein binding (GO:0005515);;	K21843|0.0e+00|pop:7461501|K21843 tetratricopeptide repeat protein 7 | (RefSeq) protein NPGR2 isoform X1	--	[T]	Signal transduction mechanisms	Tetratricopeptide repeat	Protein NPGR2 OS=Arabidopsis thaliana OX=3702 GN=NPGR2 PE=1 SV=1	T	Signal transduction mechanisms	protein NPGR2 isoform X1 [Populus trichocarpa]
gene-POPTR_T103400	AKR1	1.52653	1.11835	0.840556	4.44347	4.90856	4.936	8.99855e-22	2.03633	up	[R]	General function prediction only	Molecular Function: oxidoreductase activity (GO:0016491);;	K01456|3.5e-141|pper:18774423|K01456 peptide-N4-(N-acetyl-beta-glucosaminyl)asparagine amidase [EC:3.5.1.52] | (RefSeq) peptide-N(4)-(N-acetyl-beta- glucosaminyl)asparagine amidase isoform X1	Protein processing in endoplasmic reticulum (ko04141)	[C]	Energy production and conversion	Aldo/keto reductase family	Probable aldo-keto reductase 1 OS=Glycine max OX=3847 GN=AKR1 PE=2 SV=1	C	Energy production and conversion	hypothetical protein POPTR_T103400 [Populus trichocarpa]
gene-POPTR_014G169450	--	2.1211	1.11818	1.28865	3.95634	4.07856	4.25681	8.20324e-05	1.39374	up	--	--	--	--	--	--	--	--	--	--	--	hypothetical protein POPTR_014G169450 [Populus trichocarpa]
gene-POPTR_019G053000	--	12.7403	10.5264	12.4283	25.725	27.6508	25.3408	1.70633e-55	1.19151	up	--	--	--	K09122|4.0e-82|sbi:8057957|K09122 uncharacterized protein | (RefSeq) uncharacterized protein LOC8057957	--	--	--	Protein of unknown function (DUF707)	--	S	Function unknown	uncharacterized protein LOC7459218 [Populus trichocarpa]
gene-POPTR_011G148600	At5g64700	1.56775	1.93602	1.62158	11.086	11.4869	10.4795	3.36269e-74	2.71414	up	--	--	Cellular Component: plasma membrane (GO:0005886);; Cellular Component: integral component of membrane (GO:0016021);; Molecular Function: transmembrane transporter activity (GO:0022857);;	--	--	--	--	EamA-like transporter family	WAT1-related protein At5g64700 OS=Arabidopsis thaliana OX=3702 GN=At5g64700 PE=2 SV=1	S	Function unknown	WAT1-related protein At5g64700 isoform X3 [Populus trichocarpa]
gene-POPTR_004G056900	DOF1.5	1.29025	0.759984	1.18297	3.19938	3.70429	3.6866	8.1922e-11	1.71696	up	--	--	Molecular Function: DNA binding (GO:0003677);; Molecular Function: transcription factor activity, sequence-specific DNA binding (GO:0003700);; Cellular Component: nucleus (GO:0005634);;	K16222|3.7e-29|boe:106331877|K16222 Dof zinc finger protein DOF5.5 | (RefSeq) cyclic dof factor 1	Circadian rhythm - plant (ko04712)	--	--	Dof domain, zinc finger	Dof zinc finger protein DOF1.5 OS=Arabidopsis thaliana OX=3702 GN=DOF1.5 PE=1 SV=1	K	Transcription	dof zinc finger protein DOF1.5 [Populus trichocarpa]
gene-POPTR_014G162800	--	129.588	113.432	116.386	291.67	287.862	296.989	1.00278e-124	1.33726	up	--	--	--	--	--	--	--	--	--	--	--	unknown [Populus trichocarpa]
gene-POPTR_002G127000	--	1.96593	1.6863	1.1054	7.15062	7.70662	7.91823	1.09524e-36	2.27466	up	--	--	Molecular Function: calcium ion binding (GO:0005509);;	K02183|6.3e-21|pda:113462379|K02183 calmodulin | (RefSeq) calmodulin-1-like	MAPK signaling pathway - plant (ko04016);; Phosphatidylinositol signaling system (ko04070);; Plant-pathogen interaction (ko04626)	--	--	EF hand	--	S	Function unknown	phosphatidylserine decarboxylase proenzyme 3 [Populus trichocarpa]
gene-POPTR_002G106900	SUC4	7.95989	6.94398	8.2005	18.9764	18.2677	18.4759	4.21262e-70	1.32076	up	[G]	Carbohydrate transport and metabolism	Cellular Component: vacuole (GO:0005773);; Cellular Component: plasma membrane (GO:0005886);; Cellular Component: integral component of plasma membrane (GO:0005887);; Molecular Function: sucrose:proton symporter activity (GO:0008506);; Cellular Component: plant-type vacuole membrane (GO:0009705);; Cellular Component: membrane (GO:0016020);;	K15378|3.4e-294|pop:18096251|K15378 solute carrier family 45, member 1/2/4 | (RefSeq) sucrose transport protein SUC4 isoform X1	--	[G]	Carbohydrate transport and metabolism	Major Facilitator Superfamily	Sucrose transport protein SUC4 OS=Arabidopsis thaliana OX=3702 GN=SUC4 PE=1 SV=2	G	Carbohydrate transport and metabolism	sucrose transport protein SUC4 isoform X1 [Populus trichocarpa]
gene-POPTR_018G129500	At1g32860	2.41389	2.38621	2.34208	5.11542	4.91986	4.97599	8.25153e-28	1.11909	up	--	--	Molecular Function: hydrolase activity, hydrolyzing O-glycosyl compounds (GO:0004553);; Biological Process: carbohydrate metabolic process (GO:0005975);;	K19892|2.2e-64|bna:106452288|K19892 glucan endo-1,3-beta-glucosidase 4 [EC:3.2.1.39] | (RefSeq) glucan endo-1,3-beta-glucosidase 4-like	Starch and sucrose metabolism (ko00500)	--	--	Glycosyl hydrolases family 17	Glucan endo-1,3-beta-glucosidase 11 OS=Arabidopsis thaliana OX=3702 GN=At1g32860 PE=2 SV=1	G	Carbohydrate transport and metabolism	hypothetical protein POPTR_018G129500 [Populus trichocarpa]
gene-POPTR_002G233400	RIC4	0.069261	0.210514	0.15376	0.872534	0.915386	0.895885	3.37125e-07	2.41097	up	--	--	--	K23541|7.2e-27|egu:105051209|K23541 Ca2+/H+ antiporter, TMEM165/GDT1 family | (RefSeq) LOW QUALITY PROTEIN: uncharacterized protein LOC105051209	--	--	--	P21-Rho-binding domain	CRIB domain-containing protein RIC4 OS=Arabidopsis thaliana OX=3702 GN=RIC4 PE=1 SV=1	S	Function unknown	CRIB domain-containing protein RIC4 [Populus trichocarpa]
gene-POPTR_015G083400	--	1.1343	1.62203	0.712071	5.95129	6.80127	5.48574	1.83847e-22	2.37177	up	--	--	Molecular Function: protein binding (GO:0005515);;	--	--	--	--	PB1 domain	--	S	Function unknown	uncharacterized protein LOC7453801 [Populus trichocarpa]
gene-POPTR_019G037300	--	0.925093	1.0287	0.796064	1.87566	2.3141	2.43667	5.52185e-10	1.29117	up	--	--	--	--	--	--	--	--	--	--	--	DNA ligase 1-like isoform X1 [Populus trichocarpa]
gene-POPTR_019G122500	MIK2	0.534491	0.484466	0.470955	1.3491	1.50069	1.66795	1.3481e-16	1.62479	up	[T]	Signal transduction mechanisms	Molecular Function: protein kinase activity (GO:0004672);; Molecular Function: ATP binding (GO:0005524);; Cellular Component: plasma membrane (GO:0005886);; Biological Process: hormone-mediated signaling pathway (GO:0009755);; Cellular Component: integral component of membrane (GO:0016021);;	K13415|1.6e-93|han:110929858|K13415 protein brassinosteroid insensitive 1 [EC:2.7.10.1 2.7.11.1] | (RefSeq) systemin receptor SR160-like	Plant hormone signal transduction (ko04075)	--	--	Protein kinase domain	MDIS1-interacting receptor like kinase 2 OS=Arabidopsis thaliana OX=3702 GN=MIK2 PE=1 SV=3	T	Signal transduction mechanisms	MDIS1-interacting receptor like kinase 2 [Populus trichocarpa]
gene-POPTR_008G181400	--	6.01601	5.63123	6.0813	17.4158	15.7837	15.6295	1.17904e-68	1.50968	up	[O]	Posttranslational modification, protein turnover, chaperones	Molecular Function: cysteine-type endopeptidase activity (GO:0004197);; Cellular Component: membrane (GO:0016020);; Biological Process: CAAX-box protein processing (GO:0071586);;	K07052|4.6e-169|pop:7494799|K07052 uncharacterized protein | (RefSeq) uncharacterized protein LOC7494799	--	--	--	CPBP intramembrane metalloprotease	--	S	Function unknown	uncharacterized protein LOC7494799 [Populus trichocarpa]
gene-POPTR_001G017000	--	9.90791	8.64842	8.89265	23.2345	26.7791	24.1573	2.37742e-74	1.48238	up	--	--	Cellular Component: plasma membrane (GO:0005886);;	--	--	--	--	--	--	--	--	uncharacterized protein LOC7496042 [Populus trichocarpa]
gene-POPTR_011G121200	CPR1	7.95327	6.47763	8.26248	14.2752	15.0632	15.3341	1.21237e-26	1.02629	up	--	--	Molecular Function: protein binding (GO:0005515);;	K11649|3.2e-23|mtr:MTR_6g053260|K11649 SWI/SNF related-matrix-associated actin-dependent regulator of chromatin subfamily C | (RefSeq) F-box and associated interaction domain protein	--	--	--	F-box associated	F-box protein CPR1 OS=Arabidopsis thaliana OX=3702 GN=CPR1 PE=1 SV=2	S	Function unknown	F-box protein CPR1 [Populus trichocarpa]
gene-POPTR_010G060900	--	0.771459	0.79245	0.905051	2.11458	2.2498	2.27791	6.77857e-08	1.4309	up	[O]	Posttranslational modification, protein turnover, chaperones	Molecular Function: glutathione transferase activity (GO:0004364);; Cellular Component: cytoplasm (GO:0005737);; Biological Process: glutathione metabolic process (GO:0006749);;	K00799|2.8e-128|pop:7477018|K00799 glutathione S-transferase [EC:2.5.1.18] | (RefSeq) probable glutathione S-transferase	Glutathione metabolism (ko00480)	[O]	Posttranslational modification, protein turnover, chaperones	Glutathione S-transferase, N-terminal domain	Probable glutathione S-transferase OS=Nicotiana tabacum OX=4097 PE=2 SV=1	O	Posttranslational modification, protein turnover, chaperones	probable glutathione S-transferase [Populus trichocarpa]
gene-POPTR_T141501	MLO10	3.12717	2.99153	2.94858	6.80068	7.26744	7.94395	9.01489e-17	1.31621	up	--	--	Biological Process: defense response (GO:0006952);; Cellular Component: integral component of membrane (GO:0016021);;	K08472|6.0e-105|pop:7492117|K08472 mlo protein | (RefSeq) MLO-like protein 8	--	--	--	Mlo family	MLO-like protein 10 OS=Arabidopsis thaliana OX=3702 GN=MLO10 PE=2 SV=1	G	Carbohydrate transport and metabolism	hypothetical protein POPTR_T141501 [Populus trichocarpa]
gene-POPTR_001G332700	Os09g0505700	20.4038	20.0254	19.3859	48.8079	56.7741	48.752	1.93309e-77	1.41591	up	[G]	Carbohydrate transport and metabolism	Molecular Function: ribulose-phosphate 3-epimerase activity (GO:0004750);; Cellular Component: cytosol (GO:0005829);; Biological Process: pentose-phosphate shunt, non-oxidative branch (GO:0009052);; Biological Process: pentose catabolic process (GO:0019323);; Biological Process: cellular carbohydrate metabolic process (GO:0044262);; Molecular Function: metal ion binding (GO:0046872);;	K01783|4.6e-126|pop:7456223|K01783 ribulose-phosphate 3-epimerase [EC:5.1.3.1] | (RefSeq) ribulose-phosphate 3-epimerase, cytoplasmic isoform	Pentose phosphate pathway (ko00030);; Pentose and glucuronate interconversions (ko00040);; Carbon fixation in photosynthetic organisms (ko00710);; Carbon metabolism (ko01200);; Biosynthesis of amino acids (ko01230)	[G]	Carbohydrate transport and metabolism	Ribulose-phosphate 3 epimerase family	Ribulose-phosphate 3-epimerase, cytoplasmic isoform OS=Oryza sativa subsp. japonica OX=39947 GN=Os09g0505700 PE=1 SV=1	G	Carbohydrate transport and metabolism	ribulose-phosphate 3-epimerase, cytoplasmic isoform [Populus trichocarpa]
gene-POPTR_001G084600	--	5.03564	4.0447	5.90926	11.8255	11.9628	12.2719	1.04646e-26	1.31653	up	--	--	Cellular Component: integral component of membrane (GO:0016021);;	--	--	--	--	--	--	--	--	hypothetical protein POPTR_001G084600 [Populus trichocarpa]
gene-POPTR_013G040000	AKR1	3.90848	4.45884	4.21156	12.0754	11.1546	12.2625	1.55946e-46	1.54086	up	[R]	General function prediction only	Molecular Function: oxidoreductase activity (GO:0016491);;	K01456|5.6e-139|pper:18774423|K01456 peptide-N4-(N-acetyl-beta-glucosaminyl)asparagine amidase [EC:3.5.1.52] | (RefSeq) peptide-N(4)-(N-acetyl-beta- glucosaminyl)asparagine amidase isoform X1	Protein processing in endoplasmic reticulum (ko04141)	[C]	Energy production and conversion	Aldo/keto reductase family	Probable aldo-keto reductase 1 OS=Glycine max OX=3847 GN=AKR1 PE=2 SV=1	C	Energy production and conversion	perakine reductase isoform X2 [Populus trichocarpa]
gene-POPTR_016G047900	PHL5	0.462828	0.308325	0.298697	3.15606	3.48807	3.30382	2.26973e-47	3.18969	up	--	--	Molecular Function: DNA binding (GO:0003677);; Cellular Component: nucleus (GO:0005634);;	K14491|5.9e-09|pda:103714495|K14491 two-component response regulator ARR-B family | (RefSeq) two-component response regulator ORR26-like	Plant hormone signal transduction (ko04075)	--	--	MYB-CC type transfactor, LHEQLE motif	Myb family transcription factor PHL5 OS=Arabidopsis thaliana OX=3702 GN=PHL5 PE=2 SV=1	K	Transcription	myb family transcription factor PHL5 isoform X2 [Populus trichocarpa]
gene-POPTR_015G136600	--	3.94777	3.93784	4.33806	8.19433	9.22963	9.2019	4.20475e-26	1.16987	up	--	--	Cellular Component: Golgi membrane (GO:0000139);; Biological Process: GPI anchor biosynthetic process (GO:0006506);; Cellular Component: integral component of membrane (GO:0016021);; Molecular Function: hydrolase activity, acting on ester bonds (GO:0016788);; Cellular Component: intrinsic component of endoplasmic reticulum membrane (GO:0031227);;	K23553|9.3e-211|pop:7474013|K23553 post-GPI attachment to proteins factor 3 | (RefSeq) post-GPI attachment to proteins factor 3	--	[S]	Function unknown	Per1-like family	--	S	Function unknown	post-GPI attachment to proteins factor 3 [Populus trichocarpa]
gene-POPTR_005G042400	At4g27220	1.92403	1.58561	1.47595	4.76528	5.02144	4.94151	2.3452e-54	1.60588	up	[R]	General function prediction only	Molecular Function: ADP binding (GO:0043531);;	K13459|4.6e-151|vvi:104880791|K13459 disease resistance protein RPS2 | (RefSeq) probable disease resistance protein At4g27220	Plant-pathogen interaction (ko04626)	[T]	Signal transduction mechanisms	NB-ARC domain	Probable disease resistance protein At4g27220 OS=Arabidopsis thaliana OX=3702 GN=At4g27220 PE=2 SV=1	T	Signal transduction mechanisms	probable disease resistance protein At4g27220 [Populus trichocarpa]
gene-POPTR_005G071300	ATL55	1.35729	1.14884	0.920882	3.62566	3.9531	4.03961	2.92965e-23	1.78622	up	--	--	Cellular Component: integral component of membrane (GO:0016021);; Biological Process: protein ubiquitination (GO:0016567);;	K10664|7.1e-64|vvi:100854068|K10664 E3 ubiquitin-protein ligase ATL6/9/15/31/42/55 [EC:2.3.2.27] | (RefSeq) RING-H2 finger protein ATL54	--	[O]	Posttranslational modification, protein turnover, chaperones	Ring finger domain	E3 ubiquitin-protein ligase RING1 OS=Arabidopsis thaliana OX=3702 GN=ATL55 PE=1 SV=1	O	Posttranslational modification, protein turnover, chaperones	RING-H2 finger protein ATL52 [Populus trichocarpa]
gene-POPTR_010G188400	YAK1	2.5768	3.05477	3.06385	6.1013	5.91803	6.08054	3.31762e-26	1.10429	up	[R]	General function prediction only	Molecular Function: protein kinase activity (GO:0004672);; Molecular Function: ATP binding (GO:0005524);;	K18669|1.0e-104|vcn:VOLCADRAFT_77582|K18669 dual specificity tyrosine-phosphorylation-regulated kinase 2/3/4 [EC:2.7.12.1] | (RefSeq) hypothetical protein	--	[R]	General function prediction only	Protein kinase domain	Dual specificity protein kinase YAK1 homolog OS=Arabidopsis thaliana OX=3702 GN=YAK1 PE=1 SV=1	T	Signal transduction mechanisms	hypothetical protein POPTR_010G188400 [Populus trichocarpa]
gene-POPTR_011G015801	--	0.09369	0	0	3.02096	3.56569	2.77829	6.45643e-22	5.29852	up	--	--	--	K00895|1.3e-77|hbr:110656716|K00895 diphosphate-dependent phosphofructokinase [EC:2.7.1.90] | (RefSeq) LOW QUALITY PROTEIN: uncharacterized protein LOC110656716	Glycolysis / Gluconeogenesis (ko00010);; Pentose phosphate pathway (ko00030);; Fructose and mannose metabolism (ko00051)	--	--	Ankyrin repeats (3 copies)	--	L	Replication, recombination and repair	hypothetical protein POPTR_011G015801 [Populus trichocarpa]
gene-POPTR_016G142632	--	38.376	39.9977	43.5217	81.0396	85.8853	77.0279	2.34006e-55	1.05303	up	--	--	--	--	--	--	--	--	--	S	Function unknown	uncharacterized protein LOC7482622 [Populus trichocarpa]
gene-POPTR_001G115400	DTX56	0.464452	0.264385	0.331722	4.01441	4.30858	4.13816	5.66715e-52	3.5007	up	[V]	Defense mechanisms	Molecular Function: antiporter activity (GO:0015297);; Cellular Component: membrane (GO:0016020);; Cellular Component: integral component of membrane (GO:0016021);; Molecular Function: transmembrane transporter activity (GO:0022857);; Molecular Function: xenobiotic transporter activity (GO:0042910);;	K03327|4.1e-284|pop:18094421|K03327 multidrug resistance protein, MATE family | (RefSeq) protein DETOXIFICATION 56	--	[R]	General function prediction only	MatE	Protein DETOXIFICATION 56 OS=Arabidopsis thaliana OX=3702 GN=DTX56 PE=1 SV=1	V	Defense mechanisms	protein DETOXIFICATION 56 [Populus trichocarpa]
gene-POPTR_004G140600	ABF4	6.64116	8.73345	7.72533	16.0776	17.5528	16.3847	4.74338e-42	1.1677	up	--	--	Molecular Function: transcription factor activity, sequence-specific DNA binding (GO:0003700);; Biological Process: positive regulation of transcription, DNA-templated (GO:0045893);;	K14432|2.1e-208|pop:18097783|K14432 ABA responsive element binding factor | (RefSeq) ABSCISIC ACID-INSENSITIVE 5-like protein 7 isoform X1	Plant hormone signal transduction (ko04075)	--	--	--	ABSCISIC ACID-INSENSITIVE 5-like protein 7 OS=Arabidopsis thaliana OX=3702 GN=ABF4 PE=1 SV=1	K	Transcription	hypothetical protein POPTR_004G140600 [Populus trichocarpa]
gene-POPTR_005G229300	AUL1	11.5835	13.8751	12.8517	27.7298	27.3308	30.0965	5.1397e-66	1.20133	up	--	--	Cellular Component: cellular_component (GO:0005575);; Cellular Component: intracellular (GO:0005622);; Cellular Component: cell (GO:0005623);; Cellular Component: cytoplasm (GO:0005737);; Cellular Component: cytosol (GO:0005829);; Cellular Component: plasma membrane (GO:0005886);; Biological Process: transport (GO:0006810);; Biological Process: endocytosis (GO:0006897);; Biological Process: recep…	--	--	[R]	General function prediction only	--	Auxilin-like protein 1 OS=Arabidopsis thaliana OX=3702 GN=AUL1 PE=2 SV=2	S	Function unknown	auxilin-like protein 1 isoform X1 [Populus trichocarpa]
gene-POPTR_017G106700	BZIP43	3.31271	2.97361	2.25278	7.81713	8.6866	7.48629	1.44108e-17	1.51809	up	--	--	Molecular Function: transcription factor activity, sequence-specific DNA binding (GO:0003700);;	K09060|2.2e-06|mesc:110601836|K09060 plant G-box-binding factor | (RefSeq) bZIP transcription factor 16-like isoform X1	--	--	--	bZIP transcription factor	Basic leucine zipper 43 OS=Arabidopsis thaliana OX=3702 GN=BZIP43 PE=1 SV=1	K	Transcription	hypothetical protein POPTR_017G106700 [Populus trichocarpa]
gene-POPTR_007G019300	PER72	1.98037	1.28693	1.36583	12.5689	12.8636	12.3804	6.6392e-96	3.0461	up	--	--	Molecular Function: peroxidase activity (GO:0004601);; Cellular Component: extracellular region (GO:0005576);; Biological Process: response to oxidative stress (GO:0006979);; Molecular Function: heme binding (GO:0020037);; Biological Process: hydrogen peroxide catabolic process (GO:0042744);; Molecular Function: metal ion binding (GO:0046872);;	K00430|2.6e-186|pop:7495509|K00430 peroxidase [EC:1.11.1.7] | (RefSeq) peroxidase 72	Phenylpropanoid biosynthesis (ko00940)	--	--	Peroxidase	Peroxidase 72 OS=Arabidopsis thaliana OX=3702 GN=PER72 PE=1 SV=1	Q	Secondary metabolites biosynthesis, transport and catabolism	peroxidase 72 [Populus trichocarpa]
gene-POPTR_009G091600	At4g33920	1.58126	0.967713	0.824297	3.84139	4.19451	3.95653	2.47187e-21	1.84578	up	--	--	Molecular Function: protein serine/threonine phosphatase activity (GO:0004722);; Molecular Function: magnesium-dependent protein serine/threonine phosphatase activity (GO:0004724);; Molecular Function: metal ion binding (GO:0046872);;	K01102|1.4e-220|pop:7469617|K01102 pyruvate dehydrogenase phosphatase [EC:3.1.3.43] | (RefSeq) probable protein phosphatase 2C 63	--	[T]	Signal transduction mechanisms	Protein phosphatase 2C	Probable protein phosphatase 2C 63 OS=Arabidopsis thaliana OX=3702 GN=At4g33920 PE=2 SV=1	T	Signal transduction mechanisms	probable protein phosphatase 2C 63 [Populus trichocarpa]
gene-POPTR_001G129600	PSL5	7.23372	7.99793	8.09723	16.6165	16.7804	16.593	1.39789e-77	1.15285	up	[G]	Carbohydrate transport and metabolism	Molecular Function: hydrolase activity, hydrolyzing O-glycosyl compounds (GO:0004553);; Biological Process: carbohydrate metabolic process (GO:0005975);; Molecular Function: carbohydrate binding (GO:0030246);;	K05546|1.4e-105|ota:OT_ostta08g02820|K05546 mannosyl-oligosaccharide alpha-1,3-glucosidase [EC:3.2.1.207] | (RefSeq) Glycoside hydrolase, superfamily	N-Glycan biosynthesis (ko00510);; Protein processing in endoplasmic reticulum (ko04141)	[GMO]	Carbohydrate transport and metabolism;; Cell wall/membrane/envelope biogenesis;; Posttranslational modification, protein turnover, chaperones	Glycosyl hydrolases family 31	Probable glucan 1,3-alpha-glucosidase OS=Arabidopsis thaliana OX=3702 GN=PSL5 PE=1 SV=1	--	--	uncharacterized protein LOC18094054 isoform X1 [Populus trichocarpa]
gene-POPTR_012G062300	--	6.71349	6.40388	6.48722	46.15	45.7652	44.4962	0	2.84426	up	--	--	Molecular Function: transcription regulatory region sequence-specific DNA binding (GO:0000976);; Molecular Function: RNA polymerase II regulatory region sequence-specific DNA binding (GO:0000977);; Molecular Function: RNA polymerase II transcription factor activity, sequence-specific DNA binding (GO:0000981);; Cellular Component: nucleus (GO:0005634);; Molecular Function: transcription factor bin…	K09264|7.4e-130|pop:7484716|K09264 MADS-box transcription factor, plant | (RefSeq) truncated transcription factor CAULIFLOWER A isoform X1	--	[K]	Transcription	K-box region	Agamous-like MADS-box protein AGL8 homolog OS=Solanum tuberosum OX=4113 PE=2 SV=1	K	Transcription	truncated transcription factor CAULIFLOWER A isoform X2 [Populus trichocarpa]
gene-POPTR_014G072000	CYP704C1	33.3473	30.6815	34.9268	83.6014	88.9407	83.0061	4.79107e-159	1.42063	up	[QV]	Secondary metabolites biosynthesis, transport and catabolism;; Defense mechanisms	Molecular Function: monooxygenase activity (GO:0004497);; Molecular Function: iron ion binding (GO:0005506);; Cellular Component: integral component of membrane (GO:0016021);; Molecular Function: oxidoreductase activity, acting on paired donors, with incorporation or reduction of molecular oxygen (GO:0016705);; Molecular Function: heme binding (GO:0020037);;	K20495|4.1e-114|ppp:112291140|K20495 long-chain fatty acid omega-monooxygenase [EC:1.14.14.80] | (RefSeq) cytochrome P450 704B1-like	Fatty acid degradation (ko00071);; Cutin, suberine and wax biosynthesis (ko00073)	[QI]	Secondary metabolites biosynthesis, transport and catabolism;; Lipid transport and metabolism	Cytochrome P450	Cytochrome P450 704C1 OS=Pinus taeda OX=3352 GN=CYP704C1 PE=2 SV=1	Q	Secondary metabolites biosynthesis, transport and catabolism	cytochrome P450 704C1 isoform X1 [Populus trichocarpa]
gene-POPTR_001G472800	WRKY2	10.0775	10.3514	11.2886	21.0975	22.5672	21.5142	8.66824e-70	1.09099	up	--	--	Molecular Function: transcription factor activity, sequence-specific DNA binding (GO:0003700);; Cellular Component: nucleus (GO:0005634);; Molecular Function: sequence-specific DNA binding (GO:0043565);;	K18835|0.0e+00|pop:7471719|K18835 WRKY transcription factor 2 | (RefSeq) probable WRKY transcription factor 2 isoform X3	Plant-pathogen interaction (ko04626)	--	--	WRKY DNA -binding domain	Probable WRKY transcription factor 2 OS=Arabidopsis thaliana OX=3702 GN=WRKY2 PE=1 SV=1	K	Transcription	probable WRKY transcription factor 2 isoform X1 [Populus trichocarpa]
gene-POPTR_005G041101	At4g27220	1.48172	1.46958	1.91241	4.19314	4.19301	4.05313	3.69887e-40	1.40512	up	[K]	Transcription	Molecular Function: ADP binding (GO:0043531);;	K13459|9.0e-147|vvi:100246175|K13459 disease resistance protein RPS2 | (RefSeq) probable disease resistance protein At4g27220	Plant-pathogen interaction (ko04626)	[T]	Signal transduction mechanisms	NB-ARC domain	Probable disease resistance protein At4g27220 OS=Arabidopsis thaliana OX=3702 GN=At4g27220 PE=2 SV=1	T	Signal transduction mechanisms	probable disease resistance protein At4g27220 isoform X2 [Populus trichocarpa]
gene-POPTR_015G007800	At2g46620	0.41544	0.553754	0.55175	1.44782	1.57441	1.42239	8.55851e-10	1.55438	up	[MDT]	Cell wall/membrane/envelope biogenesis;; Cell cycle control, cell division, chromosome partitioning;; Signal transduction mechanisms	Molecular Function: ATP binding (GO:0005524);; Cellular Component: integral component of membrane (GO:0016021);;	K08900|1.3e-274|pop:7475159|K08900 mitochondrial chaperone BCS1 | (RefSeq) AAA-ATPase At2g46620	--	[O]	Posttranslational modification, protein turnover, chaperones	ATPase family associated with various cellular activities (AAA)	AAA-ATPase At2g46620 OS=Arabidopsis thaliana OX=3702 GN=At2g46620 PE=2 SV=1	O	Posttranslational modification, protein turnover, chaperones	AAA-ATPase At2g46620 [Populus trichocarpa]
gene-POPTR_001G070200	--	8.12485	6.87842	6.79169	25.5457	26.6151	27.1149	7.91483e-74	1.90389	up	--	--	Molecular Function: RNA binding (GO:0003723);;	--	--	--	--	RNA recognition motif. (a.k.a. RRM, RBD, or RNP domain)	--	A	RNA processing and modification	protein vip1 isoform X1 [Populus trichocarpa]
gene-POPTR_001G470700	AP1	1.41731	1.63041	1.90385	16.6102	14.2267	18.4377	1.26811e-77	3.31572	up	[C]	Energy production and conversion	Molecular Function: electron carrier activity (GO:0009055);; Cellular Component: chloroplast (GO:0009507);; Molecular Function: metal ion binding (GO:0046872);; Molecular Function: 2 iron, 2 sulfur cluster binding (GO:0051537);;	K02639|4.0e-78|pop:7471708|K02639 ferredoxin | (RefSeq) uncharacterized protein LOC7471708	Photosynthesis (ko00195)	--	--	2Fe-2S iron-sulfur cluster binding domain	Ferredoxin, chloroplastic OS=Capsicum annuum OX=4072 GN=AP1 PE=1 SV=1	C	Energy production and conversion	uncharacterized protein LOC7471708 [Populus trichocarpa]
gene-POPTR_011G037100	SD18	0.411944	0.461131	0.402451	2.4929	2.53828	2.39956	5.67395e-45	2.55496	up	[T]	Signal transduction mechanisms	Molecular Function: protein serine/threonine kinase activity (GO:0004674);; Molecular Function: ATP binding (GO:0005524);; Cellular Component: plasma membrane (GO:0005886);; Biological Process: protein phosphorylation (GO:0006468);; Cellular Component: integral component of membrane (GO:0016021);; Biological Process: recognition of pollen (GO:0048544);;	K24104|8.6e-77|thj:104799061|K24104 GPN-loop GTPase | (RefSeq) LOW QUALITY PROTEIN: uncharacterized protein LOC104799061	--	--	--	Protein tyrosine and serine/threonine kinase	Receptor-like serine/threonine-protein kinase SD1-8 OS=Arabidopsis thaliana OX=3702 GN=SD18 PE=1 SV=1	T	Signal transduction mechanisms	receptor-like serine/threonine-protein kinase SD1-8 [Populus trichocarpa]
gene-POPTR_001G410100	--	11.6876	9.95435	10.5146	27.5934	27.1561	27.8533	3.36794e-69	1.40937	up	--	--	Cellular Component: integral component of membrane (GO:0016021);;	--	--	--	--	--	--	--	--	uncharacterized protein LOC18095869 [Populus trichocarpa]
gene-POPTR_017G084000	FTSH6	0.062813	0.09219	0.148236	1.41759	1.65892	1.47	1.65675e-29	3.7588	up	[O]	Posttranslational modification, protein turnover, chaperones	Molecular Function: ATP-dependent peptidase activity (GO:0004176);; Molecular Function: metalloendopeptidase activity (GO:0004222);; Molecular Function: ATP binding (GO:0005524);; Biological Process: proteolysis (GO:0006508);; Cellular Component: chloroplast thylakoid membrane (GO:0009535);; Cellular Component: chloroplast envelope (GO:0009941);; Biological Process: thylakoid membrane organizatio…	K03798|0.0e+00|pop:7495977|K03798 cell division protease FtsH [EC:3.4.24.-] | (RefSeq) ATP-dependent zinc metalloprotease FTSH 6, chloroplastic	--	[O]	Posttranslational modification, protein turnover, chaperones	Peptidase family M41	ATP-dependent zinc metalloprotease FTSH 6, chloroplastic OS=Arabidopsis thaliana OX=3702 GN=FTSH6 PE=2 SV=1	O	Posttranslational modification, protein turnover, chaperones	hypothetical protein POPTR_017G084000 [Populus trichocarpa]
gene-POPTR_009G134700	At5g57670	0.412936	0.226671	0.308596	6.00873	5.89511	6.7908	2.42349e-125	4.21852	up	[T]	Signal transduction mechanisms	Molecular Function: transmembrane receptor protein serine/threonine kinase activity (GO:0004675);; Molecular Function: ATP binding (GO:0005524);; Cellular Component: plasma membrane (GO:0005886);; Biological Process: protein phosphorylation (GO:0006468);;	K13430|9.7e-71|nta:107764193|K13430 serine/threonine-protein kinase PBS1 [EC:2.7.11.1] | (RefSeq) serine/threonine-protein kinase PBS1-like	Plant-pathogen interaction (ko04626)	--	--	Protein kinase domain	Probable receptor-like serine/threonine-protein kinase At5g57670 OS=Arabidopsis thaliana OX=3702 GN=At5g57670 PE=2 SV=1	T	Signal transduction mechanisms	probable receptor-like serine/threonine-protein kinase At5g57670 isoform X1 [Populus trichocarpa]
gene-POPTR_017G013700	ERF4	3.14015	2.50736	2.72845	12.1336	13.0959	13.5595	8.21494e-82	2.24943	up	--	--	Molecular Function: DNA binding (GO:0003677);; Molecular Function: transcription factor activity, sequence-specific DNA binding (GO:0003700);; Cellular Component: nucleus (GO:0005634);;	K09286|1.0e-98|pop:18106786|K09286 EREBP-like factor | (RefSeq) ethylene-responsive transcription factor 9	--	--	--	AP2 domain	Ethylene-responsive transcription factor 4 OS=Arabidopsis thaliana OX=3702 GN=ERF4 PE=1 SV=1	K	Transcription	ethylene-responsive transcription factor 9 [Populus trichocarpa]
gene-POPTR_002G248500	BHLH62	2.29241	2.46865	2.23255	7.97781	9.02108	8.18027	6.15964e-69	1.89011	up	--	--	Molecular Function: transcription factor activity, sequence-specific DNA binding (GO:0003700);; Cellular Component: nucleus (GO:0005634);; Molecular Function: protein dimerization activity (GO:0046983);;	K18878|5.7e-32|cann:107866053|K18878 BHLH transcription factor Upa20 | (RefSeq) Upa20; transcription factor bHLH137-like	Plant-pathogen interaction (ko04626)	--	--	Helix-loop-helix DNA-binding domain	Transcription factor bHLH62 OS=Arabidopsis thaliana OX=3702 GN=BHLH62 PE=2 SV=1	K	Transcription	transcription factor bHLH62 [Populus trichocarpa]
gene-POPTR_001G368000	NUDT10	11.0293	10.4664	11.2161	23.1683	22.4833	21.9937	7.14335e-73	1.11525	up	[F]	Nucleotide transport and metabolism	Molecular Function: hydrolase activity (GO:0016787);;	K22763|2.4e-42|lja:Lj2g3v1989220.3|K22763 deubiquitinase DESI2 [EC:3.4.19.12] | (RefSeq) Lj2g3v1989220.3; -	--	[T]	Signal transduction mechanisms	Nudix hydrolase domain	Nudix hydrolase 10 OS=Arabidopsis thaliana OX=3702 GN=NUDT10 PE=1 SV=1	T	Signal transduction mechanisms	nudix hydrolase 10 [Populus trichocarpa]
gene-POPTR_002G111700	CEPR1	4.9939	5.99184	6.24398	38.3321	39.6774	38.4241	0	2.80467	up	[T]	Signal transduction mechanisms	Molecular Function: protein serine/threonine kinase activity (GO:0004674);; Molecular Function: ATP binding (GO:0005524);; Cellular Component: plasma membrane (GO:0005886);; Cellular Component: integral component of membrane (GO:0016021);;	K00924|2.6e-85|lang:109334483|K00924 kinase [EC:2.7.1.-] | (RefSeq) receptor-like protein kinase HSL1	--	--	--	Protein kinase domain	Receptor protein-tyrosine kinase CEPR1 OS=Arabidopsis thaliana OX=3702 GN=CEPR1 PE=1 SV=1	T	Signal transduction mechanisms	receptor protein-tyrosine kinase CEPR1 [Populus trichocarpa]
gene-POPTR_013G005700	XTH23	5.52796	3.90416	4.82999	12.9798	13.1624	10.876	1.12132e-25	1.41818	up	[G]	Carbohydrate transport and metabolism	Molecular Function: hydrolase activity, hydrolyzing O-glycosyl compounds (GO:0004553);; Cellular Component: cell wall (GO:0005618);; Biological Process: xyloglucan metabolic process (GO:0010411);; Molecular Function: xyloglucan:xyloglucosyl transferase activity (GO:0016762);; Biological Process: cell wall biogenesis (GO:0042546);; Cellular Component: apoplast (GO:0048046);; Biological Process: ce…	K08235|2.0e-183|pop:7478884|K08235 xyloglucan:xyloglucosyl transferase [EC:2.4.1.207] | (RefSeq) probable xyloglucan endotransglucosylase/hydrolase protein 23	--	--	--	Glycosyl hydrolases family 16	Probable xyloglucan endotransglucosylase/hydrolase protein 23 OS=Arabidopsis thaliana OX=3702 GN=XTH23 PE=2 SV=1	G	Carbohydrate transport and metabolism	probable xyloglucan endotransglucosylase/hydrolase protein 23 [Populus trichocarpa]
gene-POPTR_001G058000	--	0.937724	0.425744	0.558797	4.33271	5.44018	6.49891	5.80509e-24	2.98551	up	--	--	Cellular Component: integral component of membrane (GO:0016021);;	K11094|1.3e-15|peq:110018477|K11094 U2 small nuclear ribonucleoprotein B'' | (RefSeq) U2 small nuclear ribonucleoprotein B''-like isoform X1	Spliceosome (ko03040)	--	--	Protein of unknown function (DUF3339)	--	--	--	uncharacterized protein LOC7482793, partial [Populus trichocarpa]
gene-POPTR_005G054100	DRIP2	0.394074	0.36222	0.203086	1.24277	1.55272	1.20817	2.65847e-10	2.00046	up	--	--	--	K16277|5.0e-179|pop:18098976|K16277 E3 ubiquitin-protein ligase DRIP [EC:2.3.2.27] | (RefSeq) E3 ubiquitin protein ligase DRIP2 isoform X1	--	[S]	Function unknown	Zinc finger, C3HC4 type (RING finger)	E3 ubiquitin protein ligase DRIP2 OS=Arabidopsis thaliana OX=3702 GN=DRIP2 PE=1 SV=1	O	Posttranslational modification, protein turnover, chaperones	E3 ubiquitin protein ligase DRIP2 isoform X1 [Populus trichocarpa]
gene-POPTR_004G079100	FRO2	0.069273	0	0.050478	4.20766	4.36511	4.59606	7.81859e-72	6.39766	up	[T]	Signal transduction mechanisms	Cellular Component: plasma membrane (GO:0005886);; Cellular Component: integral component of membrane (GO:0016021);; Molecular Function: oxidoreductase activity (GO:0016491);; Biological Process: oxidation-reduction process (GO:0055114);;	K00521|0.0e+00|pop:7487426|K00521 ferric-chelate reductase [EC:1.16.1.7] | (RefSeq) ferric reduction oxidase 2	--	[PQ]	Inorganic ion transport and metabolism;; Secondary metabolites biosynthesis, transport and catabolism	Ferric reductase NAD binding domain	Ferric reduction oxidase 2 OS=Arabidopsis thaliana OX=3702 GN=FRO2 PE=1 SV=2	--	--	ferric reduction oxidase 2 [Populus trichocarpa]
gene-POPTR_017G039200	APM1	15.3626	14.4547	15.9696	41.9893	41.9282	40.3598	1.36315e-170	1.49205	up	[E]	Amino acid transport and metabolism	Cellular Component: cytoplasm (GO:0005737);; Biological Process: proteolysis (GO:0006508);; Molecular Function: zinc ion binding (GO:0008270);; Molecular Function: peptide binding (GO:0042277);; Biological Process: peptide catabolic process (GO:0043171);; Molecular Function: metalloaminopeptidase activity (GO:0070006);;	K08776|0.0e+00|pop:18106996|K08776 puromycin-sensitive aminopeptidase [EC:3.4.11.-] | (RefSeq) aminopeptidase M1 isoform X1	--	[EO]	Amino acid transport and metabolism;; Posttranslational modification, protein turnover, chaperones	Peptidase family M1 domain	Aminopeptidase M1 OS=Arabidopsis thaliana OX=3702 GN=APM1 PE=1 SV=1	--	--	aminopeptidase M1 isoform X1 [Populus trichocarpa]
gene-POPTR_002G068100	--	1.22281	1.27667	1.00188	2.14954	3.68259	2.97564	1.18041e-05	1.32216	up	--	--	--	--	--	--	--	--	--	--	--	hypothetical protein POPTR_002G068100 [Populus trichocarpa]
gene-POPTR_001G407900	--	0.394914	0.243956	0.135193	1.2591	1.07423	1.44691	5.0509e-07	2.14673	up	--	--	Molecular Function: motor activity (GO:0003774);; Cellular Component: cytoplasm (GO:0005737);; Cellular Component: microtubule (GO:0005874);; Biological Process: microtubule-based process (GO:0007017);; Cellular Component: dynein complex (GO:0030286);; Molecular Function: dynein intermediate chain binding (GO:0045505);; Molecular Function: dynein light intermediate chain binding (GO:0051959);; Bi…	K10418|4.1e-62|pop:18095659|K10418 dynein light chain LC8-type | (RefSeq) dynein light chain 1, cytoplasmic	--	[Z]	Cytoskeleton	Dynein light chain type 1	Dynein 8 kDa light chain, flagellar outer arm OS=Chlamydomonas reinhardtii OX=3055 PE=1 SV=1	Z	Cytoskeleton	dynein light chain 1, cytoplasmic [Populus trichocarpa]
gene-POPTR_004G002700	COP1	4.71497	4.1707	4.35586	27.8014	31.9722	29.9448	1.17106e-291	2.80407	up	--	--	Molecular Function: ubiquitin protein ligase activity (GO:0061630);;	K10143|3.6e-274|pop:18097291|K10143 E3 ubiquitin-protein ligase RFWD2 [EC:2.3.2.27] | (RefSeq) E3 ubiquitin-protein ligase COP1 isoform X1	Ubiquitin mediated proteolysis (ko04120);; Circadian rhythm - plant (ko04712)	--	--	Zinc finger, C3HC4 type (RING finger)	E3 ubiquitin-protein ligase COP1 OS=Arabidopsis thaliana OX=3702 GN=COP1 PE=1 SV=2	T	Signal transduction mechanisms	hypothetical protein POPTR_004G002700 [Populus trichocarpa]
gene-POPTR_005G192100	At1g43650	1.69815	1.36124	1.60422	26.3252	26.9696	25.5476	1.1745e-298	4.09375	up	--	--	Cellular Component: plasma membrane (GO:0005886);; Cellular Component: integral component of membrane (GO:0016021);; Molecular Function: transmembrane transporter activity (GO:0022857);;	K17500|2.4e-55|nto:104085001|K17500 integrin-linked kinase-associated serine/threonine phosphatase 2C [EC:3.1.3.16] | (RefSeq) WAT1-related protein At3g18200 isoform X1	--	--	--	EamA-like transporter family	WAT1-related protein At1g43650 OS=Arabidopsis thaliana OX=3702 GN=At1g43650 PE=2 SV=1	S	Function unknown	WAT1-related protein At1g43650 isoform X1 [Populus trichocarpa]
gene-POPTR_T002200	RPV1	0.89961	0.777707	1.0021	1.89767	2.0814	1.96286	4.15803e-14	1.17536	up	[R]	General function prediction only	Molecular Function: ADP binding (GO:0043531);;	K00695|2.5e-49|mtr:MTR_6g478030|K00695 sucrose synthase [EC:2.4.1.13] | (RefSeq) sucrose synthase	Starch and sucrose metabolism (ko00500)	--	--	NB-ARC domain	Disease resistance protein RPV1 OS=Vitis rotundifolia OX=103349 GN=RPV1 PE=1 SV=1	T	Signal transduction mechanisms	hypothetical protein POPTR_T002200 [Populus trichocarpa]
gene-POPTR_T029480	--	0	0	0	12.1183	15.0543	19.8327	1.29365e-21	6.33188	up	--	--	--	--	--	--	--	--	--	--	--	hypothetical protein POPTR_T029480 [Populus trichocarpa]
gene-POPTR_005G176100	At4g08290	0.727421	0.904147	0.821006	15.9637	16.7645	14.6703	1.23463e-240	4.29043	up	[GER]	Carbohydrate transport and metabolism;; Amino acid transport and metabolism;; General function prediction only	Cellular Component: plasma membrane (GO:0005886);; Cellular Component: integral component of membrane (GO:0016021);; Molecular Function: transmembrane transporter activity (GO:0022857);;	--	--	--	--	EamA-like transporter family	WAT1-related protein At4g08290 OS=Arabidopsis thaliana OX=3702 GN=At4g08290 PE=2 SV=1	S	Function unknown	WAT1-related protein At4g08290 [Populus trichocarpa]
gene-POPTR_002G202300	SUS2	51.0052	49.3433	54.186	227.852	221.354	225.415	0	2.17832	up	[M]	Cell wall/membrane/envelope biogenesis	Biological Process: sucrose metabolic process (GO:0005985);; Molecular Function: sucrose synthase activity (GO:0016157);;	K00695|0.0e+00|pop:7478850|K00695 sucrose synthase [EC:2.4.1.13] | (RefSeq) sucrose synthase 2	Starch and sucrose metabolism (ko00500)	[M]	Cell wall/membrane/envelope biogenesis	Sucrose synthase	Sucrose synthase 2 OS=Pisum sativum OX=3888 GN=SUS2 PE=2 SV=1	M	Cell wall/membrane/envelope biogenesis	sucrose synthase 2 [Populus trichocarpa]
gene-POPTR_018G063900	GLIP4	1.11507	1.25762	0.974394	4.45875	3.36073	3.92813	1.11175e-23	1.83565	up	--	--	Molecular Function: hydrolase activity, acting on ester bonds (GO:0016788);;	K00679|2.8e-21|cic:CICLE_v10027727mg|K00679 phospholipid:diacylglycerol acyltransferase [EC:2.3.1.158] | (RefSeq) hypothetical protein	Glycerolipid metabolism (ko00561)	--	--	GDSL-like Lipase/Acylhydrolase	GDSL esterase/lipase 4 OS=Arabidopsis thaliana OX=3702 GN=GLIP4 PE=2 SV=2	S	Function unknown	GDSL esterase/lipase 5 [Populus trichocarpa]
gene-POPTR_002G001400	CML37	0.457917	0.532515	0.305786	9.93914	10.7806	10.7776	1.41599e-96	4.5319	up	--	--	Molecular Function: calcium ion binding (GO:0005509);;	K13448|1.7e-105|pop:7474533|K13448 calcium-binding protein CML | (RefSeq) calcium-binding protein CML37	Plant-pathogen interaction (ko04626)	[T]	Signal transduction mechanisms	EF hand	Calcium-binding protein CML37 OS=Arabidopsis thaliana OX=3702 GN=CML37 PE=1 SV=1	T	Signal transduction mechanisms	calcium-binding protein CML37 [Populus trichocarpa]
gene-POPTR_008G114200	PPC4	21.2665	19.7976	21.6202	60.4433	58.7389	60.3321	1.0578e-217	1.5698	up	[C]	Energy production and conversion	Cellular Component: cytosol (GO:0005829);; Biological Process: tricarboxylic acid cycle (GO:0006099);; Molecular Function: phosphoenolpyruvate carboxylase activity (GO:0008964);; Biological Process: carbon fixation (GO:0015977);;	K01595|0.0e+00|pop:7485946|K01595 phosphoenolpyruvate carboxylase [EC:4.1.1.31] | (RefSeq) phosphoenolpyruvate carboxylase 4	Pyruvate metabolism (ko00620);; Carbon fixation in photosynthetic organisms (ko00710);; Carbon metabolism (ko01200)	--	--	Phosphoenolpyruvate carboxylase	Phosphoenolpyruvate carboxylase 4 OS=Arabidopsis thaliana OX=3702 GN=PPC4 PE=2 SV=1	C	Energy production and conversion	phosphoenolpyruvate carboxylase 4 [Populus trichocarpa]
gene-POPTR_011G123500	NAC056	1.39457	1.35637	1.48342	3.95307	3.80594	4.13184	1.19134e-21	1.52607	up	--	--	Molecular Function: DNA binding (GO:0003677);; Molecular Function: transcription factor activity, sequence-specific DNA binding (GO:0003700);; Cellular Component: nucleus (GO:0005634);;	K00521|2.9e-42|cmos:111447866|K00521 ferric-chelate reductase [EC:1.16.1.7] | (RefSeq) ferric reduction oxidase 7, chloroplastic-like	--	--	--	No apical meristem (NAM) protein	NAC transcription factor 56 OS=Arabidopsis thaliana OX=3702 GN=NAC056 PE=2 SV=1	K	Transcription	NAC transcription factor 56 [Populus trichocarpa]
gene-POPTR_002G124100	WOX4	6.69936	6.70052	6.20649	30.3945	32.5675	28.3191	1.40003e-138	2.26198	up	--	--	Molecular Function: DNA binding (GO:0003677);; Cellular Component: nucleus (GO:0005634);; Biological Process: tissue development (GO:0009888);;	K14292|3.9e-74|cann:107850838|K14292 trimethylguanosine synthase [EC:2.1.1.-] | (RefSeq) uncharacterized LOC107850838	RNA transport (ko03013)	--	--	Homeodomain	WUSCHEL-related homeobox 4 OS=Arabidopsis thaliana OX=3702 GN=WOX4 PE=1 SV=1	K	Transcription	WUSCHEL-related homeobox 4 [Populus trichocarpa]
gene-POPTR_009G135300	HIPP26	40.9235	43.8516	39.6873	105.356	108.175	103.762	8.57326e-115	1.39978	up	--	--	Biological Process: metal ion transport (GO:0030001);; Molecular Function: metal ion binding (GO:0046872);;	K10752|1.1e-62|zju:107427343|K10752 histone-binding protein RBBP4 | (RefSeq) LOW QUALITY PROTEIN: WD-40 repeat-containing protein MSI3	--	[P]	Inorganic ion transport and metabolism	Heavy-metal-associated domain	Heavy metal-associated isoprenylated plant protein 26 OS=Arabidopsis thaliana OX=3702 GN=HIPP26 PE=1 SV=1	P	Inorganic ion transport and metabolism	heavy metal-associated isoprenylated plant protein 26 [Populus trichocarpa]
gene-POPTR_017G081600	At5g39865	1.94709	1.57551	1.69599	4.35173	4.04779	3.78896	9.75947e-14	1.25745	up	--	--	Molecular Function: electron carrier activity (GO:0009055);; Molecular Function: protein disulfide oxidoreductase activity (GO:0015035);;	K17479|4.2e-39|sind:105159887|K17479 glutaredoxin domain-containing cysteine-rich protein 1 | (RefSeq) uncharacterized protein At5g39865	--	[O]	Posttranslational modification, protein turnover, chaperones	Glutaredoxin	Uncharacterized protein At5g39865 OS=Arabidopsis thaliana OX=3702 GN=At5g39865 PE=2 SV=1	O	Posttranslational modification, protein turnover, chaperones	hypothetical protein POPTR_017G081600 [Populus trichocarpa]
gene-POPTR_003G117400	--	21.756	20.0037	20.1334	55.767	53.4108	50.4795	4.74873e-107	1.41692	up	[S]	Function unknown	--	--	--	--	--	SNARE associated Golgi protein	--	S	Function unknown	transmembrane protein 64 [Populus trichocarpa]
Populus_trichocarpa_newGene_1237	IREG2	0.683893	0.560369	0.660194	1.53068	1.7792	1.235	0.000158944	1.2428	up	--	--	Molecular Function: iron ion transmembrane transporter activity (GO:0005381);; Biological Process: iron ion transport (GO:0006826);; Cellular Component: integral component of membrane (GO:0016021);;	K14685|6.5e-84|pop:7488753|K14685 solute carrier family 40 (iron-regulated transporter), member 1 | (RefSeq) solute carrier family 40 member 2 isoform X1	--	[P]	Inorganic ion transport and metabolism	Ferroportin1 (FPN1)	Solute carrier family 40 member 2 OS=Arabidopsis thaliana OX=3702 GN=IREG2 PE=2 SV=1	P	Inorganic ion transport and metabolism	solute carrier family 40 member 2 isoform X3 [Populus trichocarpa]
gene-POPTR_005G168600	--	36.5695	37.1064	38.3726	80.8672	92.9073	82.114	1.23362e-109	1.24247	up	--	--	Molecular Function: protein binding (GO:0005515);;	K10599|7.4e-11|mpp:MICPUCDRAFT_49484|K10599 pre-mRNA-processing factor 19 [EC:2.3.2.27] | (RefSeq) hypothetical protein	Spliceosome (ko03040);; Ubiquitin mediated proteolysis (ko04120)	--	--	Anaphase-promoting complex subunit 4 WD40 domain	--	S	Function unknown	uncharacterized WD repeat-containing protein C2A9.03 isoform X1 [Populus trichocarpa]
gene-POPTR_013G109300	MYB330	29.6605	26.3224	27.8906	62.5995	61.6354	59.7383	8.68371e-88	1.18407	up	--	--	Molecular Function: transcription regulatory region sequence-specific DNA binding (GO:0000976);; Molecular Function: transcription factor activity, sequence-specific DNA binding (GO:0003700);; Cellular Component: nucleus (GO:0005634);; Biological Process: cell differentiation (GO:0030154);; Molecular Function: sequence-specific DNA binding (GO:0043565);;	K09422|3.4e-161|pop:18104422|K09422 transcription factor MYB, plant | (RefSeq) transcription factor MYB8	--	[K]	Transcription	Myb-like DNA-binding domain	Myb-related protein 330 OS=Antirrhinum majus OX=4151 GN=MYB330 PE=2 SV=1	--	--	transcription factor MYB8 [Populus trichocarpa]
gene-POPTR_001G365500	SAT3	7.44383	6.95319	6.70892	22.8365	20.74	23.8805	9.82938e-81	1.72219	up	[E]	Amino acid transport and metabolism	Cellular Component: cytosol (GO:0005829);; Biological Process: cysteine biosynthetic process from serine (GO:0006535);; Molecular Function: serine O-acetyltransferase activity (GO:0009001);;	K00640|2.3e-182|pop:7485103|K00640 serine O-acetyltransferase [EC:2.3.1.30] | (RefSeq) serine acetyltransferase 1, chloroplastic	Cysteine and methionine metabolism (ko00270);; Sulfur metabolism (ko00920);; Carbon metabolism (ko01200);; Biosynthesis of amino acids (ko01230)	[E]	Amino acid transport and metabolism	Serine acetyltransferase, N-terminal	Serine acetyltransferase 3, mitochondrial OS=Arabidopsis thaliana OX=3702 GN=SAT3 PE=1 SV=3	E	Amino acid transport and metabolism	serine acetyltransferase 1, chloroplastic [Populus trichocarpa]
gene-POPTR_004G018600	--	0.716093	0.65633	0.774251	7.79046	7.52152	6.69936	1.61454e-118	3.27104	up	--	--	--	--	--	--	--	--	--	--	--	uncharacterized protein LOC7458543 [Populus trichocarpa]
gene-POPTR_010G108100	PDLP6	2.07555	2.55045	2.60433	7.98846	8.35839	6.21167	7.48567e-30	1.67966	up	--	--	Cellular Component: plasmodesma (GO:0009506);; Cellular Component: integral component of membrane (GO:0016021);; Biological Process: defense response to bacterium (GO:0042742);; Biological Process: response to other organism (GO:0051707);;	--	--	--	--	Salt stress response/antifungal	Plasmodesmata-located protein 6 OS=Arabidopsis thaliana OX=3702 GN=PDLP6 PE=1 SV=2	S	Function unknown	cysteine-rich repeat secretory protein 12 [Populus trichocarpa]
gene-POPTR_010G129532	STN7	2.01786	1.22905	2.0974	4.92391	4.75388	4.66418	1.78389e-08	1.43156	up	[T]	Signal transduction mechanisms	Molecular Function: protein kinase activity (GO:0004672);; Molecular Function: ATP binding (GO:0005524);;	K08818|2.5e-06|bdi:100821679|K08818 cell division cycle 2-like [EC:2.7.11.22] | (RefSeq) putative cyclin-dependent kinase F-2	--	[R]	General function prediction only	Protein kinase domain	Serine/threonine-protein kinase STN7, chloroplastic OS=Arabidopsis thaliana OX=3702 GN=STN7 PE=1 SV=1	T	Signal transduction mechanisms	hypothetical protein POPTR_010G129532 [Populus trichocarpa]
gene-POPTR_001G327500	LAZY1	1.91945	2.11657	1.8906	3.76675	4.44456	4.51137	3.26561e-12	1.04774	up	--	--	Biological Process: gravitropism (GO:0009630);; Biological Process: regulation of auxin polar transport (GO:2000012);;	--	--	--	--	--	Protein LAZY 1 OS=Arabidopsis thaliana OX=3702 GN=LAZY1 PE=1 SV=1	--	--	protein LAZY 1 [Populus trichocarpa]
gene-POPTR_013G129900	--	0.86751	0.916593	0.802077	7.60097	9.28379	7.56241	3.74628e-86	3.2494	up	--	--	--	--	--	--	--	PDDEXK-like family of unknown function	--	S	Function unknown	uncharacterized protein LOC18104619 [Populus trichocarpa]
gene-POPTR_019G127500	CIPK10	6.66324	7.43702	7.09056	16.4136	16.5974	16.0564	3.83768e-57	1.26117	up	[T]	Signal transduction mechanisms	Molecular Function: protein serine/threonine kinase activity (GO:0004674);; Molecular Function: ATP binding (GO:0005524);; Biological Process: signal transduction (GO:0007165);;	K07198|1.0e-193|nnu:104593799|K07198 5'-AMP-activated protein kinase, catalytic alpha subunit [EC:2.7.11.11] | (RefSeq) CBL-interacting protein kinase 18-like	--	[T]	Signal transduction mechanisms	Protein kinase domain	CBL-interacting serine/threonine-protein kinase 10 OS=Arabidopsis thaliana OX=3702 GN=CIPK10 PE=1 SV=1	T	Signal transduction mechanisms	CBL-interacting protein kinase 2 [Populus trichocarpa]
gene-POPTR_007G005700	CYCD1-1	0.800555	0.830615	0.997934	2.21786	2.41239	2.10373	1.92378e-10	1.38204	up	--	--	Biological Process: regulation of cyclin-dependent protein serine/threonine kinase activity (GO:0000079);; Cellular Component: cyclin-dependent protein kinase holoenzyme complex (GO:0000307);; Cellular Component: nucleus (GO:0005634);; Cellular Component: cytoplasm (GO:0005737);; Molecular Function: cyclin-dependent protein serine/threonine kinase regulator activity (GO:0016538);; Cellular Compon…	K18810|1.9e-175|pop:7497742|K18810 cyclin D1/2/4, plant | (RefSeq) cyclin-D1-1 isoform X1	--	[D]	Cell cycle control, cell division, chromosome partitioning	Cyclin, N-terminal domain	Cyclin-D1-1 OS=Arabidopsis thaliana OX=3702 GN=CYCD1-1 PE=1 SV=3	D	Cell cycle control, cell division, chromosome partitioning	cyclin-D1-1 isoform X1 [Populus trichocarpa]
gene-POPTR_002G050500	XYP11	0.309021	0.112051	0.359298	1.20624	1.51011	1.32458	3.04164e-07	2.238	up	--	--	Biological Process: lipid transport (GO:0006869);; Molecular Function: lipid binding (GO:0008289);;	--	--	--	--	Probable lipid transfer	Xylogen-like protein 11 OS=Arabidopsis thaliana OX=3702 GN=XYP11 PE=2 SV=2	O	Posttranslational modification, protein turnover, chaperones	non-specific lipid-transfer protein-like protein At2g13820 [Populus trichocarpa]
gene-POPTR_019G031600	NAC087	0.628978	0.509567	0.559931	2.45596	1.73507	2.56932	1.71258e-17	1.99696	up	--	--	Molecular Function: DNA binding (GO:0003677);; Cellular Component: nucleus (GO:0005634);; Biological Process: regulation of transcription, DNA-templated (GO:0006355);;	K00521|3.5e-36|cmos:111447866|K00521 ferric-chelate reductase [EC:1.16.1.7] | (RefSeq) ferric reduction oxidase 7, chloroplastic-like	--	--	--	No apical meristem (NAM) protein	NAC domain-containing protein 87 OS=Arabidopsis thaliana OX=3702 GN=NAC087 PE=2 SV=1	K	Transcription	NAC domain-containing protein 87 isoform X1 [Populus trichocarpa]
gene-POPTR_019G003900	MED26C	7.32214	6.0649	6.86312	17.1398	18.0199	18.2808	4.47051e-84	1.44954	up	--	--	Biological Process: regulation of cyclin-dependent protein serine/threonine kinase activity (GO:0000079);; Cellular Component: cyclin-dependent protein kinase holoenzyme complex (GO:0000307);; Cellular Component: nucleus (GO:0005634);; Cellular Component: cytoplasm (GO:0005737);; Molecular Function: cyclin-dependent protein serine/threonine kinase regulator activity (GO:0016538);; Biological Proc…	K01379|1.4e-15|zma:103643987|K01379 cathepsin D [EC:3.4.23.5] | (RefSeq) aspartic proteinase isoform X1	--	--	--	TFIIS helical bundle-like domain	Probable mediator of RNA polymerase II transcription subunit 26c OS=Arabidopsis thaliana OX=3702 GN=MED26C PE=1 SV=1	K	Transcription	probable mediator of RNA polymerase II transcription subunit 26c [Populus trichocarpa]
gene-POPTR_008G059200	PP2CA	15.6295	14.7839	14.0987	46.2331	47.1448	43.6071	1.38998e-143	1.67022	up	[T]	Signal transduction mechanisms	Molecular Function: protein serine/threonine phosphatase activity (GO:0004722);; Molecular Function: magnesium-dependent protein serine/threonine phosphatase activity (GO:0004724);; Cellular Component: nucleus (GO:0005634);; Cellular Component: cytosol (GO:0005829);; Molecular Function: metal ion binding (GO:0046872);;	K14497|1.8e-223|pop:7467562|K14497 protein phosphatase 2C [EC:3.1.3.16] | (RefSeq) protein phosphatase 2C 37	MAPK signaling pathway - plant (ko04016);; Plant hormone signal transduction (ko04075)	[T]	Signal transduction mechanisms	Protein phosphatase 2C	Protein phosphatase 2C 37 OS=Arabidopsis thaliana OX=3702 GN=PP2CA PE=1 SV=1	T	Signal transduction mechanisms	protein phosphatase 2C 37 [Populus trichocarpa]
gene-POPTR_006G134200	LKR/SDH	2.12025	1.49975	1.99127	16.7114	16.6303	16.0836	1.74039e-265	3.18118	up	[E]	Amino acid transport and metabolism	Cellular Component: integral component of membrane (GO:0016021);; Molecular Function: oxidoreductase activity (GO:0016491);;	K14157|0.0e+00|pop:18100258|K14157 alpha-aminoadipic semialdehyde synthase [EC:1.5.1.8 1.5.1.9] | (RefSeq) alpha-aminoadipic semialdehyde synthase	Lysine degradation (ko00310)	[E]	Amino acid transport and metabolism	Saccharopine dehydrogenase C-terminal domain	Alpha-aminoadipic semialdehyde synthase OS=Arabidopsis thaliana OX=3702 GN=LKR/SDH PE=1 SV=1	E	Amino acid transport and metabolism	alpha-aminoadipic semialdehyde synthase [Populus trichocarpa]
gene-POPTR_015G024500	EIX2	0.152774	0.235007	0.228338	0.510627	0.377239	0.556628	7.91419e-05	1.22532	up	--	--	Cellular Component: integral component of membrane (GO:0016021);;	K13466|6.1e-142|pop:112324383|K13466 EIX receptor 1/2 | (RefSeq) receptor-like protein EIX2 isoform X1	Plant-pathogen interaction (ko04626)	[R]	General function prediction only	Leucine rich repeat	Receptor-like protein EIX2 OS=Solanum lycopersicum OX=4081 GN=EIX2 PE=1 SV=2	P	Inorganic ion transport and metabolism	hypothetical protein POPTR_015G024500 [Populus trichocarpa]
gene-POPTR_003G012300	NFD4	8.11553	7.81334	8.0604	19.9669	19.2369	19.8537	5.2891e-79	1.3491	up	[G]	Carbohydrate transport and metabolism	Cellular Component: membrane (GO:0016020);;	--	--	--	--	Nodulin-like	Protein NUCLEAR FUSION DEFECTIVE 4 OS=Arabidopsis thaliana OX=3702 GN=NFD4 PE=3 SV=1	S	Function unknown	protein NUCLEAR FUSION DEFECTIVE 4 [Populus trichocarpa]
gene-POPTR_010G251800	BBX32	0.173505	0.326005	0.11221	3.62387	4.01308	3.74369	2.44891e-45	4.07682	up	--	--	Molecular Function: zinc ion binding (GO:0008270);;	--	--	--	--	B-box zinc finger	B-box zinc finger protein 32 OS=Arabidopsis thaliana OX=3702 GN=BBX32 PE=1 SV=1	K	Transcription	B-box zinc finger protein 32 [Populus trichocarpa]
gene-POPTR_T079966	SULTR2;1	0.193941	0.204546	0.554299	1.39539	1.3306	1.39161	7.45293e-06	1.98738	up	--	--	Molecular Function: secondary active sulfate transmembrane transporter activity (GO:0008271);; Cellular Component: membrane (GO:0016020);;	K17469|3.8e-61|pop:112328192|K17469 sulfate transporter 2, low-affinity | (RefSeq) sulfate transporter 2.1-like	--	[P]	Inorganic ion transport and metabolism	STAS domain	Sulfate transporter 2.1 OS=Arabidopsis thaliana OX=3702 GN=SULTR2;1 PE=2 SV=1	P	Inorganic ion transport and metabolism	hypothetical protein POPTR_T079966 [Populus trichocarpa]
[truncated: 6,831 more rows]

## Sheet: (b) stage 2 versus stage 3
(b) Detailed list of DEGs in stage 2 versus stage 3 of "84K" poplar stems
gene ID	gene name	stage 2-1 FPKM	stage 2-2 FPKM	stage 2-3 FPKM	stage 3-1 FPKM	stage 3-2 FPKM	stage 3-3 FPKM	FDR	log2FC	regulated	COG class	COG class annotation	GO annotation	KEGG annotation	KEGG pathway annotation	KOG class	KOG class annotation	Pfam annotation	Swiss-Prot annotation	eggNOG class	eggNOG class annotation	NR annotation
[truncated: 7,507 more rows]

## Sheet: (c) stage 1 versus stage 3
(c) Detailed list of DEGs in stage 1 versus stage 3 of "84K" poplar stems
[truncated: 7,448 more rows]
