# Supplementary material for: Transcriptome and miRNAs Profiles Reveal Regulatory Network and Key Regulators of Secondary Xylem Formation in “84K” Poplar
Source: Int J Mol Sci. 2023 Nov 17;24(22):16438. doi: 10.3390/ijms242216438 (PMC10671414; doi:10.3390/ijms242216438)
Supplement: Supplementary file 1 [file ijms-24-16438-s001.zip › Supplementary Table S3.xlsx]

## Sheet: DEGs numbers
Supplementary Table S3. Number of differentially expressed genes (DEGs) encoding transcription factors during secondary growth of "84K" poplar stems
MYB transcription factor famliy	DEGs	up	down
stage 1 versus stage 2	58	40	18
stage 2 versus stage 3	9	9	0
stage 1 versus stage 3	65	46	19
NAC transcription factor famliy	DEGs	up	down
stage 1 versus stage 2	37	31	6
stage 2 versus stage 3	2	2	0
stage 1 versus stage 3	36	29	5
bHLH transcription factor famliy	DEGs	up	down
stage 1 versus stage 2	34	24	10
stage 2 versus stage 3	10	5	5
stage 1 versus stage 3	36	23	13
TCP transcription factor famliy	DEGs	up	down
stage 1 versus stage 2	15	6	9
stage 2 versus stage 3	0	0	0
stage 1 versus stage 3	16	6	10
WOX transcription factor famliy	DEGs	up	down
stage 1 versus stage 2	2	2	0
stage 2 versus stage 3	0	0	0
stage 1 versus stage 3	4	4	0
Note: (a) Detailed list of DEGs encoding MYB transcription factors during secondary growth of "84K" poplar stems (please see sheet "MYB")
Note: (b) Detailed list of DEGs encoding NAC transcription factors during secondary growth of "84K" poplar stems (please see sheet "NAC")
Note: (c) Detailed list of DEGs encoding bHLH transcription factors during secondary growth of "84K" poplar stems (please see sheet "bHLH")
Note: (d) Detailed list of DEGs encoding TCP transcription factors during secondary growth of "84K" poplar stems (please see sheet "TCP")
Note: (e) Detailed list of DEGs encoding WOX transcription factors during secondary growth of "84K" poplar stems (please see sheet "WOX")

## Sheet: (a) MYB
(a) Detailed list of DEGs encoding MYB transcription factors during secondary growth of "84K" poplar stems
gene ID	gene name	stage 1 FPKM	stage 2 FPKM	stage 3 FPKM	stage 1 versus stage 2 log2FC	stage 1 versus stage 2 regulated	stage 2 versus stage 3 log2FC	stage 2 versus stage 3 regulated	stage 1 versus stage3 log2FC	stage 1 versus stage3 regulated	COG class	COG class_annotation	GO annotation	KEGG annotation	KEGG pathway annotation	KOG class	KOG class annotation	Pfam annotation	Swiss Prot annotation	eggNOG class	eggNOG class annotation	NR annotation
gene-POPTR_005G186400	MYB52	0	0.260859	0.85173	--	--	1.01009	up	5.84832	up	--	--	Molecular Function: transcription regulatory region sequence-specific DNA binding (GO:0000976);; Molecular Function: transcription factor activity, sequence-specific DNA binding (GO:0003700);; Molecular Function: transcription cofactor activity (GO:0003712);; Cellular Component: nucleus (GO:0005634);; Biological Process: regulation of transcription, DNA-templated (GO:0006355);; Molecular Function…	K09422|8.4e-193|pop:7492441|K09422 transcription factor MYB, plant | (RefSeq) transcription factor MYB23	--	[K]	Transcription	Myb-like DNA-binding domain	Transcription factor MYB52 OS=Arabidopsis thaliana OX=3702 GN=MYB52 PE=2 SV=1	--	--	transcription factor MYB23 [Populus trichocarpa]
gene-POPTR_002G073500	MYB52	0	0.370851	0.766605	--	--	0.659752	normal	5.83268	up	--	--	Molecular Function: transcription regulatory region sequence-specific DNA binding (GO:0000976);; Molecular Function: transcription factor activity, sequence-specific DNA binding (GO:0003700);; Molecular Function: transcription cofactor activity (GO:0003712);; Cellular Component: nucleus (GO:0005634);; Biological Process: regulation of transcription, DNA-templated (GO:0006355);; Molecular Function…	K09422|4.2e-192|pop:18096185|K09422 transcription factor MYB, plant | (RefSeq) transcription factor MYB56	--	[K]	Transcription	Myb-like DNA-binding domain	Transcription factor MYB52 OS=Arabidopsis thaliana OX=3702 GN=MYB52 PE=2 SV=1	--	--	transcription factor MYB56 [Populus trichocarpa]
gene-POPTR_007G067600	MYB63	0.00880167	0.113174	1.33042	--	--	1.52261	up	5.64201	up	--	--	Molecular Function: transcription regulatory region sequence-specific DNA binding (GO:0000976);; Molecular Function: transcription factor activity, sequence-specific DNA binding (GO:0003700);; Cellular Component: nucleus (GO:0005634);; Biological Process: cell differentiation (GO:0030154);; Molecular Function: sequence-specific DNA binding (GO:0043565);;	K09422|1.2e-203|pop:7462563|K09422 transcription factor MYB, plant | (RefSeq) transcription factor MYB58	--	[K]	Transcription	Myb-like DNA-binding domain	Transcription factor MYB63 OS=Arabidopsis thaliana OX=3702 GN=MYB63 PE=1 SV=1	--	--	transcription factor MYB58 [Populus trichocarpa]
gene-POPTR_003G132000	MYB61	0.15247	5.02541	6.98999	4.91292	up	0.460606	normal	5.44578	up	--	--	Molecular Function: DNA binding (GO:0003677);; Cellular Component: nucleus (GO:0005634);;	K09422|1.4e-178|pop:7497802|K09422 transcription factor MYB, plant | (RefSeq) transcription factor MYB46 isoform X1	--	[K]	Transcription	Myb-like DNA-binding domain	Transcription factor MYB61 OS=Arabidopsis thaliana OX=3702 GN=MYB61 PE=2 SV=1	--	--	transcription factor MYB46 isoform X2 [Populus trichocarpa]
gene-POPTR_001G235500	MYB48	2.50917	155.573	107.55	5.96579	up	-0.275577	normal	5.13109	up	--	--	Molecular Function: DNA binding (GO:0003677);;	K09422|3.1e-101|pop:7485724|K09422 transcription factor MYB, plant | (RefSeq) transcription factor MYB48 isoform X2	--	[K]	Transcription	Myb-like DNA-binding domain	Transcription factor MYB48 OS=Arabidopsis thaliana OX=3702 GN=MYB48 PE=2 SV=1	--	--	transcription factor MYB48 isoform X1 [Populus trichocarpa]
gene-POPTR_009G027300	MYB48	3.01067	58.0426	79.4549	4.3051	up	0.317416	normal	4.59671	up	--	--	Molecular Function: DNA binding (GO:0003677);;	K09422|4.9e-99|pop:7488139|K09422 transcription factor MYB, plant | (RefSeq) transcription factor MYB48 isoform X2	--	[K]	Transcription	Myb-like DNA-binding domain	Transcription factor MYB48 OS=Arabidopsis thaliana OX=3702 GN=MYB48 PE=2 SV=1	--	--	transcription factor MYB48 isoform X2 [Populus trichocarpa]
gene-POPTR_016G047900	PHL5	0.356617	3.31598	8.00742	3.18969	up	1.21127	up	4.50516	up	--	--	Molecular Function: DNA binding (GO:0003677);; Cellular Component: nucleus (GO:0005634);;	K14491|5.9e-09|pda:103714495|K14491 two-component response regulator ARR-B family | (RefSeq) two-component response regulator ORR26-like	Plant hormone signal transduction (ko04075)	--	--	MYB-CC type transfactor, LHEQLE motif	Myb family transcription factor PHL5 OS=Arabidopsis thaliana OX=3702 GN=PHL5 PE=2 SV=1	K	Transcription	myb family transcription factor PHL5 isoform X2 [Populus trichocarpa]
gene-POPTR_005G063200	MYB52	0.0254383	0.509136	0.887268	--	--	0.532034	normal	4.39851	up	--	--	Molecular Function: transcription regulatory region sequence-specific DNA binding (GO:0000976);; Molecular Function: transcription factor activity, sequence-specific DNA binding (GO:0003700);; Molecular Function: transcription cofactor activity (GO:0003712);; Cellular Component: nucleus (GO:0005634);; Biological Process: regulation of transcription, DNA-templated (GO:0006355);; Cellular Component…	K09422|5.4e-253|pop:7466841|K09422 transcription factor MYB, plant | (RefSeq) transcription factor MYB97 isoform X1	--	[K]	Transcription	Myb-like DNA-binding domain	Transcription factor MYB52 OS=Arabidopsis thaliana OX=3702 GN=MYB52 PE=2 SV=1	--	--	transcription factor MYB97 isoform X1 [Populus trichocarpa]
gene-POPTR_006G150300	MYBS3	1.17813	15.4783	21.6952	3.73399	up	0.470584	normal	4.25482	up	--	--	Molecular Function: DNA binding (GO:0003677);; Cellular Component: nucleus (GO:0005634);;	K08869|2.1e-22|cre:CHLREDRAFT_165812|K08869 aarF domain-containing kinase | (RefSeq) predicted protein	--	--	--	Myb-like DNA-binding domain	Transcription factor MYBS3 OS=Oryza sativa subsp. japonica OX=39947 GN=MYBS3 PE=2 SV=1	K	Transcription	hypothetical protein POPTR_006G150300 [Populus trichocarpa]
gene-POPTR_007G106100	MYB52	0.0559083	0.556739	1.11288	--	--	0.771015	normal	4.02838	up	--	--	Molecular Function: transcription regulatory region sequence-specific DNA binding (GO:0000976);; Molecular Function: transcription factor activity, sequence-specific DNA binding (GO:0003700);; Molecular Function: transcription cofactor activity (GO:0003712);; Cellular Component: nucleus (GO:0005634);; Biological Process: regulation of transcription, DNA-templated (GO:0006355);; Molecular Function…	K09422|9.0e-206|pop:7466738|K09422 transcription factor MYB, plant | (RefSeq) transcriptional activator Myb	--	[K]	Transcription	Myb-like DNA-binding domain	Transcription factor MYB52 OS=Arabidopsis thaliana OX=3702 GN=MYB52 PE=2 SV=1	--	--	transcriptional activator Myb [Populus trichocarpa]
gene-POPTR_001G408700	MYB102	0.460542	1.52871	6.15488	1.66672	up	1.38483	up	3.63503	up	--	--	Molecular Function: transcription regulatory region sequence-specific DNA binding (GO:0000976);; Molecular Function: transcription factor activity, sequence-specific DNA binding (GO:0003700);; Cellular Component: nucleus (GO:0005634);; Biological Process: cell differentiation (GO:0030154);; Molecular Function: sequence-specific DNA binding (GO:0043565);;	K09422|1.0e-201|pop:18095667|K09422 transcription factor MYB, plant | (RefSeq) transcription factor MYB41	--	[K]	Transcription	Myb-like DNA-binding domain	Transcription factor MYB102 OS=Arabidopsis thaliana OX=3702 GN=MYB102 PE=2 SV=1	K	Transcription	transcription factor MYB41 [Populus trichocarpa]
gene-POPTR_006G101000	PHL7	0.482312	5.70157	4.86379	3.51129	up	-0.193916	normal	3.31123	up	--	--	Molecular Function: DNA binding (GO:0003677);; Cellular Component: nucleus (GO:0005634);;	K22218|1.4e-09|apro:F751_2022|K22218 protein-tyrosine sulfotransferase [EC:2.8.2.20] | (RefSeq) Protein-tyrosine sulfotransferase	--	--	--	MYB-CC type transfactor, LHEQLE motif	Myb family transcription factor PHL7 OS=Arabidopsis thaliana OX=3702 GN=PHL7 PE=2 SV=1	K	Transcription	myb family transcription factor PHL7 [Populus trichocarpa]
gene-POPTR_001G099800	MYB61	0.379578	2.59703	3.87448	2.71165	up	0.528136	normal	3.29592	up	--	--	Molecular Function: transcription regulatory region sequence-specific DNA binding (GO:0000976);; Molecular Function: transcription factor activity, sequence-specific DNA binding (GO:0003700);; Cellular Component: nucleus (GO:0005634);; Biological Process: cell differentiation (GO:0030154);; Molecular Function: sequence-specific DNA binding (GO:0043565);;	K09422|9.5e-183|pop:7479292|K09422 transcription factor MYB, plant | (RefSeq) transcription factor MYB10	--	[K]	Transcription	Myb-like DNA-binding domain	Transcription factor MYB61 OS=Arabidopsis thaliana OX=3702 GN=MYB61 PE=2 SV=1	--	--	transcription factor MYB10 [Populus trichocarpa]
gene-POPTR_016G099200	MYB36	0.650982	2.04556	5.59924	1.6293	up	1.24718	up	3.11814	up	--	--	Molecular Function: transcription regulatory region sequence-specific DNA binding (GO:0000976);; Molecular Function: transcription factor activity, sequence-specific DNA binding (GO:0003700);; Cellular Component: nucleus (GO:0005634);; Biological Process: cell differentiation (GO:0030154);; Molecular Function: sequence-specific DNA binding (GO:0043565);;	K09422|3.0e-190|pop:112324492|K09422 transcription factor MYB, plant | (RefSeq) transcription factor RAX2	--	[K]	Transcription	Myb-like DNA-binding domain	Transcription factor MYB36 OS=Arabidopsis thaliana OX=3702 GN=MYB36 PE=1 SV=1	--	--	transcription factor RAX2 [Populus trichocarpa]
gene-POPTR_007G093900	MYB93	0.198651	0.569075	1.96632	--	--	1.08419	up	3.06687	up	--	--	Molecular Function: transcription regulatory region sequence-specific DNA binding (GO:0000976);; Molecular Function: transcription factor activity, sequence-specific DNA binding (GO:0003700);; Cellular Component: nucleus (GO:0005634);; Biological Process: cell differentiation (GO:0030154);; Molecular Function: sequence-specific DNA binding (GO:0043565);;	K09422|6.6e-169|pop:7456908|K09422 transcription factor MYB, plant | (RefSeq) transcription factor MYB53	--	[K]	Transcription	Myb-like DNA-binding domain	Transcription factor MYB93 OS=Arabidopsis thaliana OX=3702 GN=MYB93 PE=1 SV=1	--	--	transcription factor MYB53 [Populus trichocarpa]
gene-POPTR_002G096800	MYB93	0.17054	0.557548	1.59706	--	--	1.00987	up	3.05252	up	--	--	Molecular Function: transcription regulatory region sequence-specific DNA binding (GO:0000976);; Molecular Function: transcription factor activity, sequence-specific DNA binding (GO:0003700);; Cellular Component: nucleus (GO:0005634);; Biological Process: cell differentiation (GO:0030154);; Molecular Function: sequence-specific DNA binding (GO:0043565);;	K09422|6.7e-198|pop:7463220|K09422 transcription factor MYB, plant | (RefSeq) transcription factor MYB93	--	[K]	Transcription	Myb-like DNA-binding domain	Transcription factor MYB93 OS=Arabidopsis thaliana OX=3702 GN=MYB93 PE=1 SV=1	--	--	transcription factor MYB93 [Populus trichocarpa]
gene-POPTR_006G221800	MYB123	2.66263	5.81849	17.5088	1.16666	up	1.32798	up	2.76947	up	--	--	Molecular Function: transcription regulatory region sequence-specific DNA binding (GO:0000976);; Molecular Function: transcription factor activity, sequence-specific DNA binding (GO:0003700);; Cellular Component: nucleus (GO:0005634);; Biological Process: cell differentiation (GO:0030154);; Molecular Function: sequence-specific DNA binding (GO:0043565);;	K09422|9.9e-166|pop:7491994|K09422 transcription factor MYB, plant | (RefSeq) myb-related protein 308	--	[K]	Transcription	Myb-like DNA-binding domain	Transcription factor MYB123 OS=Actinidia chinensis var. chinensis OX=1590841 GN=MYB123 PE=1 SV=1	K	Transcription	myb-related protein 308 [Populus trichocarpa]
gene-POPTR_001G267300	MYB83	0.453681	3.01409	3.14466	2.69009	up	0.0595874	normal	2.73761	up	--	--	Molecular Function: transcription regulatory region sequence-specific DNA binding (GO:0000976);; Molecular Function: transcription factor activity, sequence-specific DNA binding (GO:0003700);; Cellular Component: nucleus (GO:0005634);; Biological Process: cell differentiation (GO:0030154);; Molecular Function: sequence-specific DNA binding (GO:0043565);;	K09422|2.0e-191|pop:7463851|K09422 transcription factor MYB, plant | (RefSeq) transcription factor MYB83	--	[K]	Transcription	Myb-like DNA-binding domain	Transcription factor MYB83 OS=Arabidopsis thaliana OX=3702 GN=MYB83 PE=2 SV=1	--	--	transcription factor MYB83 [Populus trichocarpa]
gene-POPTR_012G039400	MYB52	0.245577	1.317	1.57889	2.36286	up	0.23362	normal	2.67422	up	--	--	Molecular Function: transcription regulatory region sequence-specific DNA binding (GO:0000976);; Molecular Function: transcription factor activity, sequence-specific DNA binding (GO:0003700);; Molecular Function: transcription cofactor activity (GO:0003712);; Cellular Component: nucleus (GO:0005634);; Biological Process: regulation of transcription, DNA-templated (GO:0006355);; Molecular Function…	K09422|4.9e-142|pop:7485188|K09422 transcription factor MYB, plant | (RefSeq) transcription factor MYB54	--	[K]	Transcription	Myb-like DNA-binding domain		Transcription factor MYB52 OS=Arabidopsis thaliana OX=3702 GN=MYB52 PE=2 SV=1	--	transcription factor MYB54 [Populus trichocarpa]
gene-POPTR_015G033600	MYB52	0.229726	0.903483	1.4682	1.90031	up	0.553302	normal	2.64091	up	--	--	Molecular Function: transcription regulatory region sequence-specific DNA binding (GO:0000976);; Molecular Function: transcription factor activity, sequence-specific DNA binding (GO:0003700);; Molecular Function: transcription cofactor activity (GO:0003712);; Cellular Component: nucleus (GO:0005634);; Biological Process: regulation of transcription, DNA-templated (GO:0006355);; Molecular Function…	K09422|1.6e-137|pop:18105577|K09422 transcription factor MYB, plant | (RefSeq) transcription factor MYB54	--	[K]	Transcription	Myb-like DNA-binding domain	Transcription factor MYB52 OS=Arabidopsis thaliana OX=3702 GN=MYB52 PE=2 SV=1	--	--	transcription factor MYB54 [Populus trichocarpa]
gene-POPTR_009G053900	MYB46	1.04279	5.62982	4.78787	2.44089	up	-0.19935	normal	2.26079	up	--	--	Molecular Function: transcription regulatory region sequence-specific DNA binding (GO:0000976);; Molecular Function: transcription factor activity, sequence-specific DNA binding (GO:0003700);; Cellular Component: nucleus (GO:0005634);; Biological Process: cell differentiation (GO:0030154);; Molecular Function: sequence-specific DNA binding (GO:0043565);;	K09422|6.4e-193|pop:7467362|K09422 transcription factor MYB, plant | (RefSeq) transcription factor MYB46	--	[K]	Transcription	Myb-like DNA-binding domain	Transcription factor MYB46 OS=Arabidopsis thaliana OX=3702 GN=MYB46 PE=2 SV=1	--	--	transcription factor MYB46 [Populus trichocarpa]
gene-POPTR_012G055600	MYB62	1.79252	6.36072	7.91003	1.85543	up	0.306033	normal	2.21714	up	--	--	Molecular Function: catalytic activity (GO:0003824);; Cellular Component: nucleus (GO:0005634);; Biological Process: regulation of transcription, DNA-templated (GO:0006355);; Molecular Function: sequence-specific DNA binding (GO:0043565);;	K09422|7.7e-191|pop:7487068|K09422 transcription factor MYB, plant | (RefSeq) transcription factor MYB62	--	[K]	Transcription	Myb-like DNA-binding domain	Transcription factor MYB62 OS=Arabidopsis thaliana OX=3702 GN=MYB62 PE=2 SV=1	--	--	transcription factor MYB62 [Populus trichocarpa]
gene-POPTR_006G191000	PHL5	0.354239	1.98534	1.59019	2.43541	up	-0.258121	normal	2.17126	up	--	--	Molecular Function: DNA binding (GO:0003677);; Cellular Component: nucleus (GO:0005634);;	K14491|1.8e-11|egu:105034345|K14491 two-component response regulator ARR-B family | (RefSeq) two-component response regulator ORR26 isoform X1	Plant hormone signal transduction (ko04075)	--	--	MYB-CC type transfactor, LHEQLE motif	Myb family transcription factor PHL5 OS=Arabidopsis thaliana OX=3702 GN=PHL5 PE=2 SV=1	K	Transcription	myb family transcription factor PHL5 [Populus trichocarpa]
gene-POPTR_015G082700	MYB86	0.863658	3.56668	3.72997	2.04383	up	0.0684608	normal	2.13853	up	--	--	Molecular Function: transcription regulatory region sequence-specific DNA binding (GO:0000976);; Molecular Function: transcription factor activity, sequence-specific DNA binding (GO:0003700);; Cellular Component: nucleus (GO:0005634);; Biological Process: regulation of stomatal movement (GO:0010119);; Biological Process: cell differentiation (GO:0030154);; Molecular Function: sequence-specific DN…	K09422|5.8e-211|pop:7453795|K09422 transcription factor MYB, plant | (RefSeq) transcription factor MYB35	--	[K]	Transcription	Myb-like DNA-binding domain	Transcription factor MYB86 OS=Arabidopsis thaliana OX=3702 GN=MYB86 PE=2 SV=1	--	--	transcription factor MYB35 [Populus trichocarpa]
gene-POPTR_002G122600	MYB44	7.29785	28.212	25.1079	1.99996	up	-0.141402	normal	1.88154	up	--	--	Molecular Function: transcription regulatory region sequence-specific DNA binding (GO:0000976);; Molecular Function: transcription factor activity, sequence-specific DNA binding (GO:0003700);; Molecular Function: transcription cofactor activity (GO:0003712);; Cellular Component: nucleus (GO:0005634);; Biological Process: regulation of transcription, DNA-templated (GO:0006355);; Molecular Function…	K09422|4.1e-162|pop:7462860|K09422 transcription factor MYB, plant | (RefSeq) transcription factor MYB44	--	[K]	Transcription	Myb-like DNA-binding domain	Transcription factor MYB44 OS=Arabidopsis thaliana OX=3702 GN=MYB44 PE=1 SV=1	--	--	transcription factor MYB44 [Populus trichocarpa]
gene-POPTR_015G046200	MYB62	1.09389	2.01858	3.63451	0.905551	normal	0.698856	normal	1.77751	up	--	--	Molecular Function: catalytic activity (GO:0003824);; Cellular Component: nucleus (GO:0005634);; Biological Process: regulation of transcription, DNA-templated (GO:0006355);; Molecular Function: sequence-specific DNA binding (GO:0043565);;	K09422|5.8e-194|pop:7453880|K09422 transcription factor MYB, plant | (RefSeq) transcription factor MYB62	--	[K]	Transcription	Myb-like DNA-binding domain	Transcription factor MYB62 OS=Arabidopsis thaliana OX=3702 GN=MYB62 PE=2 SV=1	--	--	transcription factor MYB62 [Populus trichocarpa]
gene-POPTR_014G022500	MYB44	6.30555	15.2686	20.224	1.32407	up	0.406955	normal	1.77747	up	--	--	Molecular Function: transcription regulatory region sequence-specific DNA binding (GO:0000976);; Molecular Function: transcription factor activity, sequence-specific DNA binding (GO:0003700);; Molecular Function: transcription cofactor activity (GO:0003712);; Cellular Component: nucleus (GO:0005634);; Biological Process: regulation of transcription, DNA-templated (GO:0006355);; Molecular Function…	K09422|2.0e-172|pop:18104834|K09422 transcription factor MYB, plant | (RefSeq) transcription factor MYB44	--	[K]	Transcription	Myb-like DNA-binding domain	Transcription factor MYB44 OS=Arabidopsis thaliana OX=3702 GN=MYB44 PE=1 SV=1	--	--	transcription factor MYB44 [Populus trichocarpa]
gene-POPTR_001G258700	MYB46	0.328079	0.953794	1.05386	1.51286	up	0.107802	normal	1.66051	up	--	--	Molecular Function: transcription regulatory region sequence-specific DNA binding (GO:0000976);; Molecular Function: transcription factor activity, sequence-specific DNA binding (GO:0003700);; Cellular Component: nucleus (GO:0005634);; Biological Process: cell differentiation (GO:0030154);; Molecular Function: sequence-specific DNA binding (GO:0043565);;	K09422|2.1e-196|pop:7465151|K09422 transcription factor MYB, plant | (RefSeq) transcription factor MYB46	--	[K]	Transcription	Myb-like DNA-binding domain	Transcription factor MYB46 OS=Arabidopsis thaliana OX=3702 GN=MYB46 PE=2 SV=1	--	--	transcription factor MYB46 [Populus trichocarpa]
gene-POPTR_010G004300	MYB61	1.32466	4.06896	3.54446	1.64726	up	-0.162834	normal	1.49993	up	--	--	Molecular Function: transcription regulatory region sequence-specific DNA binding (GO:0000976);; Molecular Function: transcription factor activity, sequence-specific DNA binding (GO:0003700);; Cellular Component: nucleus (GO:0005634);; Biological Process: regulation of stomatal movement (GO:0010119);; Biological Process: cell differentiation (GO:0030154);; Molecular Function: sequence-specific DN…	K09422|3.8e-204|pop:18102239|K09422 transcription factor MYB, plant | (RefSeq) transcription factor MYB8	--	[K]	Transcription	Myb-like DNA-binding domain	Transcription factor MYB61 OS=Arabidopsis thaliana OX=3702 GN=MYB61 PE=2 SV=1	--	--	transcription factor MYB8 [Populus trichocarpa]
gene-POPTR_012G140700	MYB17	1.24475	1.89452	3.30743	0.637859	normal	0.723103	normal	1.48333	up	--	--	Molecular Function: transcription regulatory region sequence-specific DNA binding (GO:0000976);; Molecular Function: transcription factor activity, sequence-specific DNA binding (GO:0003700);; Cellular Component: nucleus (GO:0005634);; Biological Process: cell differentiation (GO:0030154);; Molecular Function: sequence-specific DNA binding (GO:0043565);;	K09422|3.8e-128|pop:7454506|K09422 transcription factor MYB, plant | (RefSeq) transcription factor MYB41	--	[K]	Transcription	Myb-like DNA-binding domain	Transcription factor MYB17 OS=Arabidopsis thaliana OX=3702 GN=MYB17 PE=1 SV=1	K	Transcription	unknown [Populus trichocarpa]
gene-POPTR_009G096000	MYB73	1.49702	5.75736	3.88026	1.96026	up	-0.456578	normal	1.44185	up	--	--	Molecular Function: transcription regulatory region sequence-specific DNA binding (GO:0000976);; Molecular Function: transcription factor activity, sequence-specific DNA binding (GO:0003700);; Molecular Function: transcription cofactor activity (GO:0003712);; Cellular Component: nucleus (GO:0005634);; Biological Process: regulation of transcription, DNA-templated (GO:0006355);; Molecular Function…	K09422|4.1e-136|pop:7457558|K09422 transcription factor MYB, plant | (RefSeq) transcription factor MYB73	--	[K]	Transcription	Myb-like DNA-binding domain	Transcription factor MYB73 OS=Arabidopsis thaliana OX=3702 GN=MYB73 PE=1 SV=1	K	Transcription	transcription factor MYB73 [Populus trichocarpa]
gene-POPTR_004G144800	EFM	13.8483	32.8762	34.4511	1.297	up	0.0829637	normal	1.41623	up	--	--	Molecular Function: DNA binding (GO:0003677);; Cellular Component: nucleus (GO:0005634);;	K14491|2.4e-11|bvg:104883152|K14491 two-component response regulator ARR-B family | (RefSeq) two-component response regulator ORR24	Plant hormone signal transduction (ko04075)	--	--	Myb-like DNA-binding domain	Myb family transcription factor EFM OS=Arabidopsis thaliana OX=3702 GN=EFM PE=1 SV=2	K	Transcription	transcription factor HHO6 [Populus trichocarpa]
gene-POPTR_016G117000	PHL7	1.41218	2.30531	3.27838	0.752104	normal	0.452755	normal	1.30592	up	--	--	Molecular Function: DNA binding (GO:0003677);; Cellular Component: nucleus (GO:0005634);;	K22218|2.3e-09|apro:F751_2022|K22218 protein-tyrosine sulfotransferase [EC:2.8.2.20] | (RefSeq) Protein-tyrosine sulfotransferase	--	--	--	MYB-CC type transfactor, LHEQLE motif	Myb family transcription factor PHL7 OS=Arabidopsis thaliana OX=3702 GN=PHL7 PE=2 SV=1	K	Transcription	myb family transcription factor PHL7 [Populus trichocarpa]
gene-POPTR_008G081800	IPN2	4.32123	9.74844	10.0287	1.22232	up	0.051532	normal	1.30317	up	--	--	Molecular Function: DNA binding (GO:0003677);; Cellular Component: nucleus (GO:0005634);;	--	--	--	--	MYB-CC type transfactor, LHEQLE motif	Myb family transcription factor IPN2 OS=Lotus japonicus OX=34305 GN=IPN2 PE=1 SV=1	K	Transcription	myb family transcription factor APL isoform X2 [Populus trichocarpa]
gene-POPTR_012G084100	MYB86	1.68705	3.76827	3.89547	1.19619	up	0.0573301	normal	1.29013	up	--	--	Molecular Function: transcription regulatory region sequence-specific DNA binding (GO:0000976);; Molecular Function: transcription factor activity, sequence-specific DNA binding (GO:0003700);; Cellular Component: nucleus (GO:0005634);; Biological Process: regulation of stomatal movement (GO:0010119);; Biological Process: cell differentiation (GO:0030154);; Molecular Function: sequence-specific DN…	K09422|3.8e-210|pop:7458049|K09422 transcription factor MYB, plant | (RefSeq) transcription factor MYB7	--	[K]	Transcription	Myb-like DNA-binding domain	Transcription factor MYB86 OS=Arabidopsis thaliana OX=3702 GN=MYB86 PE=2 SV=1	--	--	transcription factor MYB7 [Populus trichocarpa]
gene-POPTR_004G021300	MYB1	23.3387	55.44	53.1745	1.29566	up	-0.0390813	normal	1.28733	up	--	--	Molecular Function: transcription regulatory region sequence-specific DNA binding (GO:0000976);; Molecular Function: transcription factor activity, sequence-specific DNA binding (GO:0003700);; Cellular Component: nucleus (GO:0005634);; Biological Process: cell differentiation (GO:0030154);; Molecular Function: sequence-specific DNA binding (GO:0043565);;	K09422|3.6e-11|pmum:103321763|K09422 transcription factor MYB, plant | (RefSeq) transcription factor WER-like	--	--	--	Myb-like DNA-binding domain	Transcription factor MYB1 OS=Crocosmia x crocosmiiflora OX=1053288 GN=MYB1 PE=2 SV=1	K	Transcription	MYB-like transcription factor ETC1 [Populus trichocarpa]
gene-POPTR_006G155200	EFM	1.36821	4.47456	4.56889	1.73539	up	0.0444873	normal	1.81758	up	--	--	Molecular Function: DNA binding (GO:0003677);; Cellular Component: nucleus (GO:0005634);;	K14491|2.9e-10|pda:103712502|K14491 two-component response regulator ARR-B family | (RefSeq) two-component response regulator ORR26-like isoform X1	Plant hormone signal transduction (ko04075)	--	--	Myb-like DNA-binding domain	Myb family transcription factor EFM OS=Arabidopsis thaliana OX=3702 GN=EFM PE=1 SV=2	K	Transcription	myb family transcription factor EFM [Populus trichocarpa]
gene-POPTR_018G074200	EFM	8.56174	20.4918	17.697	1.30926	up	-0.185009	normal	1.1507	up	--	--	Molecular Function: DNA binding (GO:0003677);; Cellular Component: nucleus (GO:0005634);;	K14491|2.9e-10|pda:103712502|K14491 two-component response regulator ARR-B family | (RefSeq) two-component response regulator ORR26-like isoform X1	Plant hormone signal transduction (ko04075)	--	--	Myb-like DNA-binding domain	Myb family transcription factor EFM OS=Arabidopsis thaliana OX=3702 GN=EFM PE=1 SV=2	K	Transcription	myb family transcription factor EFM [Populus trichocarpa]
gene-POPTR_004G144800	EFM	13.8483	32.8762	34.4511	1.297	up	0.0829637	normal	1.41623	up	--	--	Molecular Function: DNA binding (GO:0003677);; Cellular Component: nucleus (GO:0005634);;	K14491|2.4e-11|bvg:104883152|K14491 two-component response regulator ARR-B family | (RefSeq) two-component response regulator ORR24	Plant hormone signal transduction (ko04075)	--	--	Myb-like DNA-binding domain	Myb family transcription factor EFM OS=Arabidopsis thaliana OX=3702 GN=EFM PE=1 SV=2	K	Transcription	transcription factor HHO6 [Populus trichocarpa]
gene-POPTR_009G106600	EFM	12.4858	24.4931	22.4693	1.02205	up	-0.101141	normal	0.951876	normal	--	--	Molecular Function: DNA binding (GO:0003677);; Cellular Component: nucleus (GO:0005634);;	K14491|4.0e-11|ghi:107906918|K14491 two-component response regulator ARR-B family | (RefSeq) two-component response regulator ORR24-like	Plant hormone signal transduction (ko04075)	--	--	Myb-like DNA-binding domain	Myb family transcription factor EFM OS=Arabidopsis thaliana OX=3702 GN=EFM PE=1 SV=2	K	Transcription	myb family transcription factor EFM isoform X1 [Populus trichocarpa]
gene-POPTR_011G023600	IPN2	0.443603	1.27299	0.953115	1.50465	up	-0.297198	normal	1.14791	up	--	--	Molecular Function: DNA binding (GO:0003677);; Cellular Component: nucleus (GO:0005634);;	K22218|1.6e-10|apro:F751_2022|K22218 protein-tyrosine sulfotransferase [EC:2.8.2.20] | (RefSeq) Protein-tyrosine sulfotransferase	--	--	--	MYB-CC type transfactor, LHEQLE motif	Myb family transcription factor IPN2 OS=Lotus japonicus OX=34305 GN=IPN2 PE=1 SV=1	K	Transcription	myb family transcription factor APL [Populus trichocarpa]
gene-POPTR_008G081800	IPN2	4.32123	9.74844	10.0287	1.22232	up	0.051532	normal	1.30317	up	--	--	Molecular Function: DNA binding (GO:0003677);; Cellular Component: nucleus (GO:0005634);;	--	--	--	--	MYB-CC type transfactor, LHEQLE motif	Myb family transcription factor IPN2 OS=Lotus japonicus OX=34305 GN=IPN2 PE=1 SV=1	K	Transcription	myb family transcription factor APL isoform X2 [Populus trichocarpa]
gene-POPTR_001G133400	PHL11	5.87764	11.612	11.4126	1.02524	up	-0.00260284	normal	1.04936	up	--	--	Molecular Function: DNA binding (GO:0003677);; Cellular Component: nucleus (GO:0005634);;	K14491|1.8e-10|thj:104813542|K14491 two-component response regulator ARR-B family | (RefSeq) two-component response regulator ARR18-like	Plant hormone signal transduction (ko04075)	--	--	MYB-CC type transfactor, LHEQLE motif	Myb family transcription factor PHL11 OS=Arabidopsis thaliana OX=3702 GN=PHL11 PE=1 SV=1	K	Transcription	myb family transcription factor PHL11 [Populus trichocarpa]
gene-POPTR_016G047900	PHL5	0.356617	3.31598	8.00742	3.18969	up	1.21127	up	4.50516	up	--	--	Molecular Function: DNA binding (GO:0003677);; Cellular Component: nucleus (GO:0005634);;	K14491|5.9e-09|pda:103714495|K14491 two-component response regulator ARR-B family | (RefSeq) two-component response regulator ORR26-like	Plant hormone signal transduction (ko04075)	--	--	MYB-CC type transfactor, LHEQLE motif	Myb family transcription factor PHL5 OS=Arabidopsis thaliana OX=3702 GN=PHL5 PE=2 SV=1	K	Transcription	myb family transcription factor PHL5 isoform X2 [Populus trichocarpa]
gene-POPTR_006G191000	PHL5	0.354239	1.98534	1.59019	2.43541	up	-0.258121	normal	2.17126	up	--	--	Molecular Function: DNA binding (GO:0003677);; Cellular Component: nucleus (GO:0005634);;	K14491|1.8e-11|egu:105034345|K14491 two-component response regulator ARR-B family | (RefSeq) two-component response regulator ORR26 isoform X1	Plant hormone signal transduction (ko04075)	--	--	MYB-CC type transfactor, LHEQLE motif	Myb family transcription factor PHL5 OS=Arabidopsis thaliana OX=3702 GN=PHL5 PE=2 SV=1	K	Transcription	myb family transcription factor PHL5 [Populus trichocarpa]
gene-POPTR_006G101000	PHL7	0.482312	5.70157	4.86379	3.51129	up	-0.193916	normal	3.31123	up	--	--	Molecular Function: DNA binding (GO:0003677);; Cellular Component: nucleus (GO:0005634);;	K22218|1.4e-09|apro:F751_2022|K22218 protein-tyrosine sulfotransferase [EC:2.8.2.20] | (RefSeq) Protein-tyrosine sulfotransferase	--	--	--	MYB-CC type transfactor, LHEQLE motif	Myb family transcription factor PHL7 OS=Arabidopsis thaliana OX=3702 GN=PHL7 PE=2 SV=1	K	Transcription	myb family transcription factor PHL7 [Populus trichocarpa]
gene-POPTR_017G130300	MYB20	1.91894	4.52745	0.980385	1.27008	up	-1.81955	down	-0.833166	normal	--	--	Molecular Function: transcription regulatory region sequence-specific DNA binding (GO:0000976);; Molecular Function: transcription factor activity, sequence-specific DNA binding (GO:0003700);; Cellular Component: nucleus (GO:0005634);; Biological Process: cell differentiation (GO:0030154);; Molecular Function: sequence-specific DNA binding (GO:0043565);;	K09422|9.3e-181|pop:18106632|K09422 transcription factor MYB, plant | (RefSeq) transcription factor MYB20	--	[K]	Transcription	Myb-like DNA-binding domain	Transcription factor MYB20 OS=Arabidopsis thaliana OX=3702 GN=MYB20 PE=2 SV=1	--	--	transcription factor MYB20 [Populus trichocarpa]
gene-POPTR_005G142600	MYB73	12.295	28.2452	22.8252	1.24944	up	-0.252774	normal	0.991437	normal	--	--	Molecular Function: transcription regulatory region sequence-specific DNA binding (GO:0000976);; Molecular Function: transcription factor activity, sequence-specific DNA binding (GO:0003700);; Molecular Function: transcription cofactor activity (GO:0003712);; Cellular Component: nucleus (GO:0005634);; Biological Process: regulation of transcription, DNA-templated (GO:0006355);; Molecular Function…	K09422|9.5e-179|pop:7476405|K09422 transcription factor MYB, plant | (RefSeq) transcription factor MYB44	--	[K]	Transcription	Myb-like DNA-binding domain	Transcription factor MYB73 OS=Arabidopsis thaliana OX=3702 GN=MYB73 PE=1 SV=1	--	--	transcription factor MYB44 [Populus trichocarpa]
gene-POPTR_010G039300	KUA1	6.28475	17.3049	18.1366	1.50342	up	0.078284	normal	1.61752	up	--	--	Molecular Function: DNA binding (GO:0003677);; Cellular Component: nucleus (GO:0005634);; Molecular Function: zinc ion binding (GO:0008270);;	K08869|1.0e-19|cre:CHLREDRAFT_165812|K08869 aarF domain-containing kinase | (RefSeq) predicted protein	--	--	--	Myb-like DNA-binding domain	Transcription factor KUA1 OS=Arabidopsis thaliana OX=3702 GN=KUA1 PE=1 SV=1	K	Transcription	hypothetical protein POPTR_010G039300 [Populus trichocarpa]
gene-POPTR_007G048900	MYB73	9.97191	21.9497	16.4119	1.18793	up	-0.369964	normal	0.821676	normal	--	--	Molecular Function: transcription regulatory region sequence-specific DNA binding (GO:0000976);; Molecular Function: transcription factor activity, sequence-specific DNA binding (GO:0003700);; Molecular Function: transcription cofactor activity (GO:0003712);; Cellular Component: nucleus (GO:0005634);; Biological Process: regulation of transcription, DNA-templated (GO:0006355);; Molecular Function…	K09422|4.6e-183|pop:7483088|K09422 transcription factor MYB, plant | (RefSeq) transcription factor MYB44	--	[K]	Transcription	Myb-like DNA-binding domain	Transcription factor MYB73 OS=Arabidopsis thaliana OX=3702 GN=MYB73 PE=1 SV=1	--	--	transcription factor MYB44 [Populus trichocarpa]
gene-POPTR_008G142000	MOF1	1.41479	0.086191	0.185869	-2.4198	down	--	--	-2.6614	down	--	--	Molecular Function: DNA binding (GO:0003677);; Cellular Component: nucleus (GO:0005634);;	K14491|2.7e-09|cic:CICLE_v10007648mg|K14491 two-component response regulator ARR-B family | (RefSeq) hypothetical protein	Plant hormone signal transduction (ko04075)	--	--	Myb-like DNA-binding domain	Myb family transcription factor MOF1 OS=Oryza sativa subsp. japonica OX=39947 GN=MOF1 PE=1 SV=1	K	Transcription	putative Myb family transcription factor At1g14600 isoform X1 [Populus trichocarpa]
gene-POPTR_010G099600	MOF1	1.88083	0.119226	0.456142	-3.77587	down	--	--	-1.88015	down	--	--	Molecular Function: DNA binding (GO:0003677);; Cellular Component: nucleus (GO:0005634);;	K14491|2.7e-09|ath:AT3G62670|K14491 two-component response regulator ARR-B family | (RefSeq) RR20; two-component response regulator	Plant hormone signal transduction (ko04075)	--	--	Myb-like DNA-binding domain	Myb family transcription factor MOF1 OS=Oryza sativa subsp. japonica OX=39947 GN=MOF1 PE=1 SV=1	K	Transcription	putative Myb family transcription factor At1g14600 [Populus trichocarpa]
gene-POPTR_002G157600	MYB17	2.71909	0.74562	0.717788	-1.77407	down	-0.033371	normal	-1.78689	down	--	--	Molecular Function: transcription regulatory region sequence-specific DNA binding (GO:0000976);; Molecular Function: transcription factor activity, sequence-specific DNA binding (GO:0003700);; Cellular Component: nucleus (GO:0005634);; Biological Process: cell differentiation (GO:0030154);; Molecular Function: sequence-specific DNA binding (GO:0043565);;	K09422|1.0e-184|pop:18096353|K09422 transcription factor MYB, plant | (RefSeq) transcription factor MYB41	--	[K]	Transcription	Myb-like DNA-binding domain	Transcription factor MYB17 OS=Arabidopsis thaliana OX=3702 GN=MYB17 PE=1 SV=1	--	--	transcription factor MYB41 [Populus trichocarpa]
gene-POPTR_003G064600	MYB3	3.53832	1.59028	2.13836	-1.086	down	0.351385	normal	-0.615427	normal	--	--	Molecular Function: transcription regulatory region sequence-specific DNA binding (GO:0000976);; Molecular Function: transcription factor activity, sequence-specific DNA binding (GO:0003700);; Cellular Component: nucleus (GO:0005634);; Biological Process: cell differentiation (GO:0030154);; Molecular Function: sequence-specific DNA binding (GO:0043565);;	K09422|2.5e-91|pop:18096868|K09422 transcription factor MYB, plant | (RefSeq) transcription factor MYB114	--	[K]	Transcription	Myb-like DNA-binding domain	Transcription factor MYB3 OS=Crocosmia x crocosmiiflora OX=1053288 GN=MYB3 PE=2 SV=1	--	--	transcription factor MYB114 [Populus trichocarpa]
gene-POPTR_004G088100	MYB6	1.04504	0.54822	0.465659	-0.843233	normal	-0.149435	normal	-1.00294	down	--	--	Molecular Function: transcription regulatory region sequence-specific DNA binding (GO:0000976);; Molecular Function: transcription factor activity, sequence-specific DNA binding (GO:0003700);; Cellular Component: nucleus (GO:0005634);; Biological Process: cell differentiation (GO:0030154);; Molecular Function: sequence-specific DNA binding (GO:0043565);;	K09422|1.9e-141|pop:7493553|K09422 transcription factor MYB, plant | (RefSeq) transcription repressor MYB6	--	[K]	Transcription	Myb-like DNA-binding domain	Transcription repressor MYB6 OS=Arabidopsis thaliana OX=3702 GN=MYB6 PE=1 SV=1	K	Transcription	transcription repressor MYB6 [Populus trichocarpa]
gene-POPTR_004G126700	MYB306	2.85411	0.819231	0.428721	-1.69044	down	--	--	-2.52574	down	--	--	Molecular Function: transcription regulatory region sequence-specific DNA binding (GO:0000976);; Molecular Function: transcription factor activity, sequence-specific DNA binding (GO:0003700);; Cellular Component: nucleus (GO:0005634);; Biological Process: response to auxin (GO:0009733);; Biological Process: cell differentiation (GO:0030154);; Molecular Function: sequence-specific DNA binding (GO:…	K09422|3.1e-201|pop:7463057|K09422 transcription factor MYB, plant | (RefSeq) myb-related protein 306	--	[K]	Transcription	Myb-like DNA-binding domain	Myb-related protein 306 OS=Antirrhinum majus OX=4151 GN=MYB306 PE=2 SV=1	--	--	myb-related protein 306 [Populus trichocarpa]
gene-POPTR_005G112000	MYB308	6.11224	2.88271	3.51708	-1.02439	down	0.228409	normal	-0.682603	normal	--	--	Molecular Function: DNA binding (GO:0003677);; Cellular Component: nucleus (GO:0005634);;	K09422|3.9e-147|pop:18099174|K09422 transcription factor MYB, plant | (RefSeq) myb-related protein 308	--	[K]	Transcription	Myb-like DNA-binding domain	Myb-related protein 308 OS=Antirrhinum majus OX=4151 GN=MYB308 PE=2 SV=1	--	--	myb-related protein 308 [Populus trichocarpa]
gene-POPTR_006G221200	MYB3	4.41481	1.1308	1.79861	-1.88145	down	0.531481	normal	-1.16555	down	--	--	Molecular Function: transcription regulatory region sequence-specific DNA binding (GO:0000976);; Molecular Function: transcription factor activity, sequence-specific DNA binding (GO:0003700);; Cellular Component: nucleus (GO:0005634);; Biological Process: cell differentiation (GO:0030154);; Molecular Function: sequence-specific DNA binding (GO:0043565);;	K09422|1.1e-112|pop:7492298|K09422 transcription factor MYB, plant | (RefSeq) transcription factor MYB114	--	[K]	Transcription	Myb-like DNA-binding domain	Transcription factor MYB3 OS=Crocosmia x crocosmiiflora OX=1053288 GN=MYB3 PE=2 SV=1	K	Transcription	transcription factor MYB114 [Populus trichocarpa]
gene-POPTR_006G221500	MYB123	1.988	1.06193	0.476709	-0.837207	normal	-0.704132	normal	-1.85884	down	--	--	Molecular Function: transcription regulatory region sequence-specific DNA binding (GO:0000976);; Molecular Function: transcription factor activity, sequence-specific DNA binding (GO:0003700);; Cellular Component: nucleus (GO:0005634);; Biological Process: cell differentiation (GO:0030154);; Molecular Function: sequence-specific DNA binding (GO:0043565);;	K09422|4.7e-154|pop:7491993|K09422 transcription factor MYB, plant | (RefSeq) transcription factor WER	--	[K]	Transcription	Myb-like DNA-binding domain	Transcription factor MYB123 OS=Actinidia chinensis var. chinensis OX=1590841 GN=MYB123 PE=1 SV=1	K	Transcription	transcription factor WER [Populus trichocarpa]
gene-POPTR_006G241700	MYB3R4	9.5006	3.03478	2.86982	-1.58668	down	-0.0600738	normal	-1.61198	down	--	--	Molecular Function: DNA binding (GO:0003677);; Cellular Component: nucleus (GO:0005634);;	K09420|0.0e+00|pop:7462940|K09420 transcriptional activator Myb | (RefSeq) transcription factor MYB3R-1 isoform X1	--	[K]	Transcription	Myb-like DNA-binding domain	Transcription factor MYB3R-4 OS=Arabidopsis thaliana OX=3702 GN=MYB3R4 PE=1 SV=1	--	--	transcription factor MYB3R-1 isoform X1 [Populus trichocarpa]
gene-POPTR_006G275900	MYB1	7.85993	1.2484	1.09494	-2.57786	down	-0.11541	normal	-2.66545	down	--	--	Molecular Function: DNA binding (GO:0003677);; Cellular Component: nucleus (GO:0005634);;	K09422|1.1e-175|pop:18100766|K09422 transcription factor MYB, plant | (RefSeq) transcription factor WER	--	[K]	Transcription	Myb-like DNA-binding domain	Transcription factor MYB1 OS=Crocosmia x crocosmiiflora OX=1053288 GN=MYB1 PE=2 SV=1	--	--	transcription factor WER [Populus trichocarpa]
gene-POPTR_008G088000	MYB117	1.57397	0.095464	0.112435	-3.03926	down	--	--	-3.44553	down	--	--	Molecular Function: transcription regulatory region sequence-specific DNA binding (GO:0000976);; Molecular Function: transcription factor activity, sequence-specific DNA binding (GO:0003700);; Molecular Function: transcription cofactor activity (GO:0003712);; Cellular Component: nucleus (GO:0005634);; Biological Process: regulation of transcription, DNA-templated (GO:0006355);; Molecular Function…	K09422|2.3e-262|pop:7460696|K09422 transcription factor MYB, plant | (RefSeq) transcription factor CSA	--	[K]	Transcription	Myb-like DNA-binding domain	Transcription factor MYB117 OS=Arabidopsis thaliana OX=3702 GN=MYB117 PE=2 SV=1	--	--	transcription factor CSA [Populus trichocarpa]
gene-POPTR_008G089200	MYB106	5.96775	0.091012	0.061629	-4.25888	down	--	--	-4.48844	down	--	--	Molecular Function: transcription regulatory region sequence-specific DNA binding (GO:0000976);; Molecular Function: transcription factor activity, sequence-specific DNA binding (GO:0003700);; Cellular Component: nucleus (GO:0005634);; Biological Process: cell differentiation (GO:0030154);; Molecular Function: sequence-specific DNA binding (GO:0043565);;	K09422|1.1e-223|pop:7460705|K09422 transcription factor MYB, plant | (RefSeq) transcription factor MYB106	--	[K]	Transcription	Myb-like DNA-binding domain	Transcription factor MYB106 OS=Arabidopsis thaliana OX=3702 GN=MYB106 PE=2 SV=1	--	--	transcription factor MYB106 [Populus trichocarpa]
gene-POPTR_008G089700	MYB106	10.9783	0.0782977	0.0459737	-6.63756	down	--	--	-7.18644	down	--	--	Molecular Function: transcription regulatory region sequence-specific DNA binding (GO:0000976);; Molecular Function: transcription factor activity, sequence-specific DNA binding (GO:0003700);; Cellular Component: nucleus (GO:0005634);; Biological Process: cell differentiation (GO:0030154);; Molecular Function: sequence-specific DNA binding (GO:0043565);;	K09422|1.8e-223|pop:7460701|K09422 transcription factor MYB, plant | (RefSeq) transcription factor MYB106	--	[K]	Transcription	Myb-like DNA-binding domain	Transcription factor MYB106 OS=Arabidopsis thaliana OX=3702 GN=MYB106 PE=2 SV=1	--	--	transcription factor MYB106 [Populus trichocarpa]
gene-POPTR_008G122100	MYB62	4.01909	2.78949	1.43328	-0.466266	normal	-0.779274	normal	-1.35493	down	--	--	Molecular Function: catalytic activity (GO:0003824);; Cellular Component: nucleus (GO:0005634);; Biological Process: regulation of transcription, DNA-templated (GO:0006355);; Molecular Function: sequence-specific DNA binding (GO:0043565);;	K09422|1.8e-184|pop:7488366|K09422 transcription factor MYB, plant | (RefSeq) transcription factor MYB62	--	[K]	Transcription	Myb-like DNA-binding domain	Transcription factor MYB62 OS=Arabidopsis thaliana OX=3702 GN=MYB62 PE=2 SV=1	--	--	transcription factor MYB62 [Populus trichocarpa]
gene-POPTR_010G165700	MYB106	5.14372	0.185126	0.215946	-4.55446	down	--	--	-4.28358	down	--	--	Molecular Function: transcription regulatory region sequence-specific DNA binding (GO:0000976);; Molecular Function: transcription factor activity, sequence-specific DNA binding (GO:0003700);; Cellular Component: nucleus (GO:0005634);; Biological Process: cell differentiation (GO:0030154);; Molecular Function: sequence-specific DNA binding (GO:0043565);;	K09422|1.1e-225|pop:7481570|K09422 transcription factor MYB, plant | (RefSeq) transcription factor MYB106	--	[K]	Transcription	Myb-like DNA-binding domain	Transcription factor MYB106 OS=Arabidopsis thaliana OX=3702 GN=MYB106 PE=2 SV=1	--	--	transcription factor MYB106 [Populus trichocarpa]
gene-POPTR_010G167500	MYB117	2.39268	0.336541	0.367662	-2.70857	down	0.089764	normal	-2.5087	down	--	--	Molecular Function: DNA binding (GO:0003677);; Cellular Component: nucleus (GO:0005634);;	K09422|1.6e-263|pop:7492931|K09422 transcription factor MYB, plant | (RefSeq) uncharacterized protein LOC7492931	--	[K]	Transcription	Myb-like DNA-binding domain	Transcription factor MYB117 OS=Arabidopsis thaliana OX=3702 GN=MYB117 PE=2 SV=1	--	--	uncharacterized protein LOC7492931 [Populus trichocarpa]
gene-POPTR_012G060300	MYBS1	3.64543	0.582451	0.550906	-2.50017	down	--	--	-2.50402	down	--	--	Molecular Function: DNA binding (GO:0003677);; Cellular Component: nucleus (GO:0005634);; Biological Process: response to gibberellin (GO:0009739);; Biological Process: response to salicylic acid (GO:0009751);;	K08869|3.3e-31|cre:CHLREDRAFT_165812|K08869 aarF domain-containing kinase | (RefSeq) predicted protein	--	[O]	Posttranslational modification, protein turnover, chaperones	Myb-like DNA-binding domain	Transcription factor MYBS1 OS=Oryza sativa subsp. indica OX=39946 GN=MYBS1 PE=3 SV=1	K	Transcription	transcription factor MYBS1 [Populus trichocarpa]
gene-POPTR_017G086300	MYB106	10.0751	5.925	4.15557	-0.708077	normal	-0.457796	normal	-1.1596	down	--	--	Molecular Function: transcription regulatory region sequence-specific DNA binding (GO:0000976);; Molecular Function: transcription factor activity, sequence-specific DNA binding (GO:0003700);; Cellular Component: nucleus (GO:0005634);; Biological Process: cell differentiation (GO:0030154);; Molecular Function: sequence-specific DNA binding (GO:0043565);;	K09422|1.4e-230|pop:7482487|K09422 transcription factor MYB, plant | (RefSeq) transcription factor MYB16	--	[K]	Transcription	Myb-like DNA-binding domain	Transcription factor MYB106 OS=Arabidopsis thaliana OX=3702 GN=MYB106 PE=2 SV=1	--	--	hypothetical protein POPTR_017G086300 [Populus trichocarpa]
gene-POPTR_018G005300	MYB1	1.10609	0.0548307	0.015779	-3.82957	down	--	--	-5.06661	down	--	--	Molecular Function: transcription regulatory region sequence-specific DNA binding (GO:0000976);; Molecular Function: transcription factor activity, sequence-specific DNA binding (GO:0003700);; Cellular Component: nucleus (GO:0005634);; Biological Process: cell differentiation (GO:0030154);; Molecular Function: sequence-specific DNA binding (GO:0043565);;	K09422|6.3e-115|pop:18100766|K09422 transcription factor MYB, plant | (RefSeq) transcription factor WER	--	[K]	Transcription	Myb-like DNA-binding domain	Transcription factor MYB1 OS=Crocosmia x crocosmiiflora OX=1053288 GN=MYB1 PE=2 SV=1	--	--	myb-related protein 308 [Populus trichocarpa]
gene-POPTR_018G127700	MYB82	4.53206	1.1719	1.97891	-1.86114	down	0.589176	normal	-1.06608	down	--	--	Molecular Function: transcription regulatory region sequence-specific DNA binding (GO:0000976);; Molecular Function: transcription factor activity, sequence-specific DNA binding (GO:0003700);; Cellular Component: nucleus (GO:0005634);; Biological Process: cell differentiation (GO:0030154);; Molecular Function: sequence-specific DNA binding (GO:0043565);;	K09422|8.2e-131|pop:7459879|K09422 transcription factor MYB, plant | (RefSeq) transcription factor MYB82	--	[K]	Transcription	Myb-like DNA-binding domain	Transcription factor MYB82 OS=Arabidopsis thaliana OX=3702 GN=MYB82 PE=1 SV=1	K	Transcription	transcription factor MYB82 [Populus trichocarpa]
gene-POPTR_019G081500	MYB330	1.35002	0.558865	0.940658	-1.17883	down	0.553184	normal	-0.402149	normal	--	--	Molecular Function: transcription regulatory region sequence-specific DNA binding (GO:0000976);; Molecular Function: transcription factor activity, sequence-specific DNA binding (GO:0003700);; Cellular Component: nucleus (GO:0005634);; Biological Process: cell differentiation (GO:0030154);; Molecular Function: sequence-specific DNA binding (GO:0043565);;	K09422|7.3e-164|pop:7475793|K09422 transcription factor MYB, plant | (RefSeq) transcription factor MYB8	--	[K]	Transcription	Myb-like DNA-binding domain	Myb-related protein 330 OS=Antirrhinum majus OX=4151 GN=MYB330 PE=2 SV=1	--	--	transcription factor MYB8 [Populus trichocarpa]

## Sheet: (b) NAC
(b) Detailed list of DEGs encoding NAC transcription factors during secondary growth of "84K" poplar stems
gene ID	gene name	stage 1 FPKM	stage 2 FPKM	stage 3 FPKM	stage 1 versus stage 2 log2FC	stage 1 versus stage 2 regulated	stage 2 versus stage 3 log2FC	stage 2 versus stage 3 regulated	stage 1 versus stage3 log2FC	stage 1 versus stage3 regulated	COG class	COG class_annotation	GO annotation	KEGG annotation	KEGG pathway annotation	KOG class	KOG class annotation	Pfam annotation	Swiss Prot annotation	eggNOG class	eggNOG class annotation	NR annotation
gene-POPTR_002G037100	NAC021	0.716594	6.69852	13.0075	3.2161	up	0.796835	normal	4.15828	up	--	--	Molecular Function: DNA binding (GO:0003677);; Cellular Component: nucleus (GO:0005634);; Biological Process: regulation of transcription, DNA-templated (GO:0006355);;	K00521|1.1e-33|cmos:111447866|K00521 ferric-chelate reductase [EC:1.16.1.7] | (RefSeq) ferric reduction oxidase 7, chloroplastic-like	--	--	--	No apical meristem (NAM) protein	NAC domain-containing protein 21/22 OS=Arabidopsis thaliana OX=3702 GN=NAC021 PE=1 SV=2	K	Transcription	protein CUP-SHAPED COTYLEDON 2 [Populus trichocarpa]
gene-POPTR_005G064100	NAC104	2.24961	10.5379	13.4003	2.25045	up	0.343601	normal	2.64772	up	--	--	Molecular Function: DNA binding (GO:0003677);; Cellular Component: nucleus (GO:0005634);; Biological Process: regulation of transcription, DNA-templated (GO:0006355);; Biological Process: system development (GO:0048731);;	--	--	--	--	No apical meristem (NAM) protein	NAC domain-containing protein 104 OS=Arabidopsis thaliana OX=3702 GN=NAC104 PE=2 SV=1	K	Transcription	NAC domain-containing protein 104 [Populus trichocarpa]
gene-POPTR_014G104800	NAC043	0.82288	1.94995	2.16873	1.26071	up	0.129176	normal	1.43361	up	--	--	Molecular Function: DNA binding (GO:0003677);; Cellular Component: nucleus (GO:0005634);; Biological Process: regulation of transcription, DNA-templated (GO:0006355);;	K00521|2.9e-32|cmos:111447866|K00521 ferric-chelate reductase [EC:1.16.1.7] | (RefSeq) ferric reduction oxidase 7, chloroplastic-like	--	--	--	No apical meristem (NAM) protein	NAC domain-containing protein 43 OS=Arabidopsis thaliana OX=3702 GN=NAC043 PE=2 SV=2	K	Transcription	NAC domain-containing protein 43 [Populus trichocarpa]
gene-POPTR_019G031400	NAC047	3.2034	7.95386	9.63843	1.35474	up	0.279819	normal	1.68139	up	--	--	Molecular Function: DNA binding (GO:0003677);; Cellular Component: nucleus (GO:0005634);; Biological Process: regulation of transcription, DNA-templated (GO:0006355);;	K00521|3.2e-44|cmos:111447866|K00521 ferric-chelate reductase [EC:1.16.1.7] | (RefSeq) ferric reduction oxidase 7, chloroplastic-like	--	--	--	No apical meristem (NAM) protein	NAC transcription factor 47 OS=Arabidopsis thaliana OX=3702 GN=NAC047 PE=2 SV=1	K	Transcription	NAC transcription factor 47 [Populus trichocarpa]
gene-POPTR_004G049300	NAC073	0.853099	2.65659	4.0918	1.65659	up	0.549015	normal	2.3114	up	--	--	Molecular Function: transcription regulatory region sequence-specific DNA binding (GO:0000976);; Cellular Component: nucleus (GO:0005634);; Biological Process: regulation of transcription, DNA-templated (GO:0006355);;	--	--	--	--	No apical meristem (NAM) protein	NAC domain-containing protein 73 OS=Arabidopsis thaliana OX=3702 GN=NAC073 PE=2 SV=1	K	Transcription	NAC domain-containing protein 73 [Populus trichocarpa]
gene-POPTR_014G041300	NAC074	10.4325	29.4371	27.9074	1.64858	up	-0.0506119	normal	1.62325	up	--	--	Molecular Function: DNA binding (GO:0003677);; Cellular Component: nucleus (GO:0005634);; Biological Process: regulation of transcription, DNA-templated (GO:0006355);;	--	--	--	--	No apical meristem (NAM) protein	NAC domain-containing protein 74 OS=Oryza sativa subsp. japonica OX=39947 GN=NAC074 PE=2 SV=1	K	Transcription	NAC domain-containing protein 79 isoform X3 [Populus trichocarpa]
gene-POPTR_001G206900	NAC104	0.79425	5.37294	0.890253	2.72463	up	-1.96054	down	--	--	--	--	Molecular Function: DNA binding (GO:0003677);; Cellular Component: nucleus (GO:0005634);; Biological Process: regulation of transcription, DNA-templated (GO:0006355);; Biological Process: system development (GO:0048731);;	K00521|2.4e-19|cmos:111447866|K00521 ferric-chelate reductase [EC:1.16.1.7] | (RefSeq) ferric reduction oxidase 7, chloroplastic-like	--	--	--	No apical meristem (NAM) protein	NAC domain-containing protein 104 OS=Arabidopsis thaliana OX=3702 GN=NAC104 PE=2 SV=1	K	Transcription	NAC domain-containing protein 104 [Populus trichocarpa]
gene-POPTR_011G123500	NAC056	1.41145	3.96362	6.4619	1.52607	up	0.680965	normal	2.28058	up	--	--	Molecular Function: DNA binding (GO:0003677);; Molecular Function: transcription factor activity, sequence-specific DNA binding (GO:0003700);; Cellular Component: nucleus (GO:0005634);;	K00521|2.9e-42|cmos:111447866|K00521 ferric-chelate reductase [EC:1.16.1.7] | (RefSeq) ferric reduction oxidase 7, chloroplastic-like	--	--	--	No apical meristem (NAM) protein	NAC transcription factor 56 OS=Arabidopsis thaliana OX=3702 GN=NAC056 PE=2 SV=1	K	Transcription	NAC transcription factor 56 [Populus trichocarpa]
gene-POPTR_019G031600	NAC087	0.566159	2.25345	4.00222	1.99696	up	0.733237	normal	2.8754	up	--	--	Molecular Function: DNA binding (GO:0003677);; Cellular Component: nucleus (GO:0005634);; Biological Process: regulation of transcription, DNA-templated (GO:0006355);;	K00521|3.5e-36|cmos:111447866|K00521 ferric-chelate reductase [EC:1.16.1.7] | (RefSeq) ferric reduction oxidase 7, chloroplastic-like	--	--	--	No apical meristem (NAM) protein	NAC domain-containing protein 87 OS=Arabidopsis thaliana OX=3702 GN=NAC087 PE=2 SV=1	K	Transcription	NAC domain-containing protein 87 isoform X1 [Populus trichocarpa]
gene-POPTR_005G225800	NAC021	0.42334	4.1082	8.14535	3.24377	up	0.813012	normal	4.21895	up	--	--	Molecular Function: DNA binding (GO:0003677);; Cellular Component: nucleus (GO:0005634);; Biological Process: regulation of transcription, DNA-templated (GO:0006355);;	K00521|2.0e-33|cmos:111447866|K00521 ferric-chelate reductase [EC:1.16.1.7] | (RefSeq) ferric reduction oxidase 7, chloroplastic-like	--	--	--	No apical meristem (NAM) protein	NAC domain-containing protein 21/22 OS=Arabidopsis thaliana OX=3702 GN=NAC021 PE=1 SV=2	K	Transcription	NAC domain-containing protein 21/22 [Populus trichocarpa]
gene-POPTR_005G069500	NAC081	0.81494	3.17474	4.79637	1.97197	up	0.530445	normal	2.59875	up	--	--	Molecular Function: DNA binding (GO:0003677);; Cellular Component: nucleus (GO:0005634);; Biological Process: regulation of transcription, DNA-templated (GO:0006355);;	K00521|3.3e-42|cmos:111447866|K00521 ferric-chelate reductase [EC:1.16.1.7] | (RefSeq) ferric reduction oxidase 7, chloroplastic-like	--	--	--	No apical meristem (NAM) protein	Protein ATAF2 OS=Arabidopsis thaliana OX=3702 GN=NAC081 PE=1 SV=1	K	Transcription	NAC domain-containing protein 2 [Populus trichocarpa]
gene-POPTR_003G113000	NAC007	0.785833	1.95232	2.32362	1.33816	up	0.221784	normal	1.62793	up	--	--	Molecular Function: DNA binding (GO:0003677);; Cellular Component: nucleus (GO:0005634);; Biological Process: regulation of transcription, DNA-templated (GO:0006355);;	K00521|6.3e-37|cmos:111447866|K00521 ferric-chelate reductase [EC:1.16.1.7] | (RefSeq) ferric reduction oxidase 7, chloroplastic-like	--	--	--	No apical meristem (NAM) protein	NAC domain-containing protein 7 OS=Arabidopsis thaliana OX=3702 GN=NAC007 PE=1 SV=2	K	Transcription	wood-associated NAC domain transcription factor 4B [Populus trichocarpa]
gene-POPTR_012G001400	NAC100	0.926039	3.17063	3.11193	1.80043	up	-0.00531601	normal	1.80589	up	--	--	Molecular Function: DNA binding (GO:0003677);; Cellular Component: nucleus (GO:0005634);; Biological Process: regulation of transcription, DNA-templated (GO:0006355);;	K00521|2.4e-36|cmos:111447866|K00521 ferric-chelate reductase [EC:1.16.1.7] | (RefSeq) ferric reduction oxidase 7, chloroplastic-like	--	--	--	No apical meristem (NAM) protein	NAC domain-containing protein 100 OS=Arabidopsis thaliana OX=3702 GN=NAC100 PE=2 SV=1	K	Transcription	NAC domain-containing protein 100 [Populus trichocarpa]
gene-POPTR_012G126500	NAC007	0.836686	1.74804	1.73075	1.09374	up	0.0213733	normal	1.14785	up	--	--	Molecular Function: DNA binding (GO:0003677);; Cellular Component: nucleus (GO:0005634);; Biological Process: regulation of transcription, DNA-templated (GO:0006355);;	K00521|2.6e-38|cmos:111447866|K00521 ferric-chelate reductase [EC:1.16.1.7] | (RefSeq) ferric reduction oxidase 7, chloroplastic-like	--	--	--	No apical meristem (NAM) protein	NAC domain-containing protein 7 OS=Arabidopsis thaliana OX=3702 GN=NAC007 PE=1 SV=2	K	Transcription	NAC domain-containing protein 7 [Populus trichocarpa]
gene-POPTR_007G065400	NAC021	0.239489	2.55436	1.92268	3.29263	up	-0.222031	normal	--	--	--	--	Molecular Function: DNA binding (GO:0003677);; Cellular Component: nucleus (GO:0005634);; Biological Process: regulation of transcription, DNA-templated (GO:0006355);;	K00521|2.6e-31|cmos:111447866|K00521 ferric-chelate reductase [EC:1.16.1.7] | (RefSeq) ferric reduction oxidase 7, chloroplastic-like	--	--	--	No apical meristem (NAM) protein	NAC domain-containing protein 21/22 OS=Arabidopsis thaliana OX=3702 GN=NAC021 PE=1 SV=2	K	Transcription	NAC domain-containing protein 21/22 isoform X1 [Populus trichocarpa]
gene-POPTR_011G058400	NAC073	0.291604	0.911276	1.32689	1.58152	up	0.402282	normal	2.14089	up	--	--	Molecular Function: DNA binding (GO:0003677);; Cellular Component: nucleus (GO:0005634);; Biological Process: regulation of transcription, DNA-templated (GO:0006355);;	--	--	--	--	No apical meristem (NAM) protein	NAC domain-containing protein 73 OS=Arabidopsis thaliana OX=3702 GN=NAC073 PE=2 SV=1	K	Transcription	NAC domain-containing protein 73 [Populus trichocarpa]
gene-POPTR_011G153300	NAC012	2.96532	19.2755	22.9245	2.74106	up	0.252127	normal	3.02996	up	--	--	Molecular Function: DNA binding (GO:0003677);; Cellular Component: nucleus (GO:0005634);; Biological Process: regulation of transcription, DNA-templated (GO:0006355);;	K00521|3.1e-35|cmos:111447866|K00521 ferric-chelate reductase [EC:1.16.1.7] | (RefSeq) ferric reduction oxidase 7, chloroplastic-like	--	--	--	No apical meristem (NAM) protein	NAC domain-containing protein 12 OS=Arabidopsis thaliana OX=3702 GN=NAC012 PE=2 SV=1	K	Transcription	NAC domain-containing protein 43 isoform X2 [Populus trichocarpa]
gene-POPTR_013G054200	NAC087	0.655891	1.3196	1.96514	1.02187	up	0.504351	normal	1.6395	up	--	--	Molecular Function: DNA binding (GO:0003677);; Cellular Component: nucleus (GO:0005634);; Biological Process: regulation of transcription, DNA-templated (GO:0006355);;	K00521|1.3e-35|cmos:111447866|K00521 ferric-chelate reductase [EC:1.16.1.7] | (RefSeq) ferric reduction oxidase 7, chloroplastic-like	--	--	--	No apical meristem (NAM) protein	NAC domain-containing protein 87 OS=Arabidopsis thaliana OX=3702 GN=NAC087 PE=2 SV=1	K	Transcription	NAC domain-containing protein 87 [Populus trichocarpa]
gene-POPTR_001G448400	NAC043	0.394334	6.39421	7.52021	3.99035	up	0.233446	normal	4.26652	up	--	--	Molecular Function: DNA binding (GO:0003677);; Cellular Component: nucleus (GO:0005634);; Biological Process: regulation of transcription, DNA-templated (GO:0006355);; Molecular Function: identical protein binding (GO:0042802);;	K00521|2.0e-34|cmos:111447866|K00521 ferric-chelate reductase [EC:1.16.1.7] | (RefSeq) ferric reduction oxidase 7, chloroplastic-like	--	--	--	No apical meristem (NAM) protein	NAC domain-containing protein 43 OS=Arabidopsis thaliana OX=3702 GN=NAC043 PE=2 SV=2	K	Transcription	NAC domain-containing protein 43 [Populus trichocarpa]
gene-POPTR_014G075900	NAC071	0.954802	1.97707	1.76095	1.07972	up	-0.136421	normal	0.963751	normal	--	--	Molecular Function: DNA binding (GO:0003677);; Cellular Component: nucleus (GO:0005634);; Biological Process: regulation of transcription, DNA-templated (GO:0006355);;	--	--	--	--	No apical meristem (NAM) protein	NAC domain-containing protein 71 OS=Arabidopsis thaliana OX=3702 GN=NAC071 PE=2 SV=1	--	--	NAC domain-containing protein 45 isoform X1 [Populus trichocarpa]
gene-POPTR_018G068700	NAC075	0.669853	1.42044	1.70301	1.10928	up	0.231076	normal	1.405	up	--	--	Molecular Function: transcription regulatory region sequence-specific DNA binding (GO:0000976);; Cellular Component: nucleus (GO:0005634);; Biological Process: regulation of transcription, DNA-templated (GO:0006355);;	--	--	--	--	No apical meristem (NAM) protein	NAC domain-containing protein 75 OS=Arabidopsis thaliana OX=3702 GN=NAC075 PE=2 SV=1	K	Transcription	NAC domain-containing protein 75 [Populus trichocarpa]
gene-POPTR_004G038000	NAC025	0.0215917	1.01699	1.56143	4.62943	up	0.325212	normal	--	--	--	--	Molecular Function: DNA binding (GO:0003677);; Cellular Component: nucleus (GO:0005634);; Biological Process: regulation of transcription, DNA-templated (GO:0006355);; Biological Process: system development (GO:0048731);;	K00521|6.8e-44|cmos:111447866|K00521 ferric-chelate reductase [EC:1.16.1.7] | (RefSeq) ferric reduction oxidase 7, chloroplastic-like	--	--	--	No apical meristem (NAM) protein	NAC transcription factor 25 OS=Arabidopsis thaliana OX=3702 GN=NAC025 PE=2 SV=1	K	Transcription	NAC transcription factor 25 [Populus trichocarpa]
gene-POPTR_014G076100	NAC071	0.995072	2.16996	1.97199	1.17841	up	-0.113668	normal	1.0863	up	--	--	Molecular Function: DNA binding (GO:0003677);; Cellular Component: nucleus (GO:0005634);; Biological Process: regulation of transcription, DNA-templated (GO:0006355);;	--	--	--	--	No apical meristem (NAM) protein	NAC domain-containing protein 71 OS=Arabidopsis thaliana OX=3702 GN=NAC071 PE=2 SV=1	--	--	NAC domain-containing protein 45-like isoform X1 [Populus trichocarpa]
gene-POPTR_007G135300	NAC073	1.13588	7.77697	8.65771	2.79825	up	0.158289	normal	2.98023	up	--	--	Molecular Function: transcription regulatory region sequence-specific DNA binding (GO:0000976);; Cellular Component: nucleus (GO:0005634);; Biological Process: regulation of transcription, DNA-templated (GO:0006355);;	--	--	--	--	No apical meristem (NAM) protein	NAC domain-containing protein 73 OS=Arabidopsis thaliana OX=3702 GN=NAC073 PE=2 SV=1	K	Transcription	NAC domain-containing protein 73 [Populus trichocarpa]
gene-POPTR_017G016700	NAC073	1.47322	6.45893	7.44676	2.16456	up	0.212721	normal	2.41519	up	--	--	Molecular Function: transcription regulatory region sequence-specific DNA binding (GO:0000976);; Cellular Component: nucleus (GO:0005634);; Biological Process: regulation of transcription, DNA-templated (GO:0006355);;	--	--	--	--	No apical meristem (NAM) protein	NAC domain-containing protein 73 OS=Arabidopsis thaliana OX=3702 GN=NAC073 PE=2 SV=1	K	Transcription	NAC domain-containing protein 73 [Populus trichocarpa]
gene-POPTR_013G054000	NAC047	0.128575	0.810661	1.1192	2.43311	up	0.314527	normal	2.88805	up	--	--	Molecular Function: DNA binding (GO:0003677);; Cellular Component: nucleus (GO:0005634);; Biological Process: regulation of transcription, DNA-templated (GO:0006355);;	K00521|3.0e-42|cmos:111447866|K00521 ferric-chelate reductase [EC:1.16.1.7] | (RefSeq) ferric reduction oxidase 7, chloroplastic-like	--	--	--	No apical meristem (NAM) protein	NAC transcription factor 47 OS=Arabidopsis thaliana OX=3702 GN=NAC047 PE=2 SV=1	K	Transcription	NAC transcription factor 47 [Populus trichocarpa]
gene-POPTR_001G452700	NAC014	1.07097	2.34136	2.45025	1.16357	up	0.0717575	normal	1.27447	up	--	--	Molecular Function: DNA binding (GO:0003677);; Cellular Component: nucleus (GO:0005634);; Biological Process: regulation of transcription, DNA-templated (GO:0006355);; Cellular Component: integral component of membrane (GO:0016021);;	K00521|1.6e-35|cmos:111447866|K00521 ferric-chelate reductase [EC:1.16.1.7] | (RefSeq) ferric reduction oxidase 7, chloroplastic-like	--	--	--	No apical meristem (NAM) protein	NAC domain-containing protein 14 OS=Arabidopsis thaliana OX=3702 GN=NAC014 PE=2 SV=1	K	Transcription	hypothetical protein POPTR_001G452700 [Populus trichocarpa]
gene-POPTR_001G404400	NAC056	1.00983	5.48983	6.06517	2.46641	up	0.143358	normal	2.6357	up	--	--	Molecular Function: DNA binding (GO:0003677);; Molecular Function: transcription factor activity, sequence-specific DNA binding (GO:0003700);; Cellular Component: nucleus (GO:0005634);;	K00521|5.0e-42|cmos:111447866|K00521 ferric-chelate reductase [EC:1.16.1.7] | (RefSeq) ferric reduction oxidase 7, chloroplastic-like	--	--	--	No apical meristem (NAM) protein	NAC transcription factor 56 OS=Arabidopsis thaliana OX=3702 GN=NAC056 PE=2 SV=1	K	Transcription	NAC transcription factor 56 [Populus trichocarpa]
gene-POPTR_002G178700	NAC043	0.275869	1.59292	2.3634	2.46699	up	0.48823	normal	3.07082	up	--	--	Molecular Function: DNA binding (GO:0003677);; Cellular Component: nucleus (GO:0005634);; Biological Process: regulation of transcription, DNA-templated (GO:0006355);;	K00521|1.0e-32|cmos:111447866|K00521 ferric-chelate reductase [EC:1.16.1.7] | (RefSeq) ferric reduction oxidase 7, chloroplastic-like	--	--	--	No apical meristem (NAM) protein	NAC domain-containing protein 43 OS=Arabidopsis thaliana OX=3702 GN=NAC043 PE=2 SV=2	K	Transcription	NAC domain-containing protein 43 [Populus trichocarpa]
gene-POPTR_005G098200	NAC021	0.0627047	1.74302	3.11153	4.41146	up	0.726774	normal	5.2498	up	--	--	Molecular Function: DNA binding (GO:0003677);; Cellular Component: nucleus (GO:0005634);; Biological Process: regulation of transcription, DNA-templated (GO:0006355);;	K00521|1.4e-21|cmos:111447866|K00521 ferric-chelate reductase [EC:1.16.1.7] | (RefSeq) ferric reduction oxidase 7, chloroplastic-like	--	--	--	No apical meristem (NAM) protein	NAC domain-containing protein 21/22 OS=Arabidopsis thaliana OX=3702 GN=NAC021 PE=1 SV=2	K	Transcription	NAC domain-containing protein 21/22 isoform X3 [Populus trichocarpa]
gene-POPTR_007G099400	NAC002	1.0177	5.35309	6.17556	2.4118	up	0.195903	normal	2.67259	up	--	--	Molecular Function: DNA binding (GO:0003677);; Cellular Component: nucleus (GO:0005634);; Biological Process: regulation of transcription, DNA-templated (GO:0006355);;	K00521|4.2e-42|cmos:111447866|K00521 ferric-chelate reductase [EC:1.16.1.7] | (RefSeq) ferric reduction oxidase 7, chloroplastic-like	--	--	--	No apical meristem (NAM) protein	NAC domain-containing protein 2 OS=Arabidopsis thaliana OX=3702 GN=NAC002 PE=1 SV=2	K	Transcription	NAC domain-containing protein 2 [Populus trichocarpa]
gene-POPTR_007G105000	NAC104	0.13882	1.04601	2.60204	--	--	1.01839	up	4.00599	up	--	--	Molecular Function: DNA binding (GO:0003677);; Cellular Component: nucleus (GO:0005634);; Biological Process: regulation of transcription, DNA-templated (GO:0006355);; Biological Process: system development (GO:0048731);;	--	--	--	--	No apical meristem (NAM) protein	NAC domain-containing protein 104 OS=Arabidopsis thaliana OX=3702 GN=NAC104 PE=2 SV=1	K	Transcription	NAC domain-containing protein 104 [Populus trichocarpa]
gene-POPTR_006G277000	NAC098	0	0.0303863	0.928109	--	--	2.2944	up	6.16889	up	--	--	Molecular Function: DNA binding (GO:0003677);; Cellular Component: nucleus (GO:0005634);; Biological Process: regulation of transcription, DNA-templated (GO:0006355);;	K00521|3.0e-39|cmos:111447866|K00521 ferric-chelate reductase [EC:1.16.1.7] | (RefSeq) ferric reduction oxidase 7, chloroplastic-like	--	--	--	No apical meristem (NAM) protein	Protein CUP-SHAPED COTYLEDON 2 OS=Arabidopsis thaliana OX=3702 GN=NAC098 PE=1 SV=1	K	Transcription	NAC domain-containing protein 100 isoform X1 [Populus trichocarpa]
gene-POPTR_001G396300	NAC098	1.44697	0.0764803	0.0547033	-3.6545	down	--	--	-3.94661	down	--	--	Molecular Function: DNA binding (GO:0003677);; Cellular Component: nucleus (GO:0005634);; Biological Process: regulation of transcription, DNA-templated (GO:0006355);;	K00521|1.4e-35|cmos:111447866|K00521 ferric-chelate reductase [EC:1.16.1.7] | (RefSeq) ferric reduction oxidase 7, chloroplastic-like	--	--	--	No apical meristem (NAM) protein	Protein CUP-SHAPED COTYLEDON 2 OS=Arabidopsis thaliana OX=3702 GN=NAC098 PE=1 SV=1	K	Transcription	protein CUP-SHAPED COTYLEDON 2 [Populus trichocarpa]
gene-POPTR_002G005800	NAC031	1.42789	0.325826	0.272338	-1.99168	down	--	--	-2.16225	down	--	--	Molecular Function: DNA binding (GO:0003677);; Cellular Component: nucleus (GO:0005634);; Biological Process: regulation of transcription, DNA-templated (GO:0006355);;	K00521|2.7e-37|cmos:111447866|K00521 ferric-chelate reductase [EC:1.16.1.7] | (RefSeq) ferric reduction oxidase 7, chloroplastic-like	--	--	--	No apical meristem (NAM) protein	Protein CUP-SHAPED COTYLEDON 3 OS=Arabidopsis thaliana OX=3702 GN=NAC031 PE=1 SV=1	K	Transcription	protein CUP-SHAPED COTYLEDON 3 [Populus trichocarpa]
gene-POPTR_003G046700	NAC035	0.747388	0.0214227	0.0162833	-4.51587	down	--	--	-4.3881	down	--	--	Molecular Function: DNA binding (GO:0003677);; Cellular Component: nucleus (GO:0005634);; Biological Process: regulation of transcription, DNA-templated (GO:0006355);;	K00521|1.8e-96|cmos:111447866|K00521 ferric-chelate reductase [EC:1.16.1.7] | (RefSeq) ferric reduction oxidase 7, chloroplastic-like	--	--	--	No apical meristem (NAM) protein	NAC domain-containing protein 35 OS=Arabidopsis thaliana OX=3702 GN=NAC035 PE=1 SV=2	K	Transcription	NAC domain-containing protein 35 [Populus trichocarpa]
gene-POPTR_004G230800	NAC035	1.77785	0.201553	0.139235	-2.96381	down	--	--	-3.22745	down	--	--	Molecular Function: DNA binding (GO:0003677);; Cellular Component: nucleus (GO:0005634);; Biological Process: regulation of transcription, DNA-templated (GO:0006355);;	K00521|5.3e-90|cmos:111447866|K00521 ferric-chelate reductase [EC:1.16.1.7] | (RefSeq) ferric reduction oxidase 7, chloroplastic-like	--	--	--	No apical meristem (NAM) protein	NAC domain-containing protein 35 OS=Arabidopsis thaliana OX=3702 GN=NAC035 PE=1 SV=2	K	Transcription	NAC domain-containing protein 35 [Populus trichocarpa]
gene-POPTR_005G255900	NAC031	1.1175	0.231478	0.413849	-2.09881	down	--	--	-1.27543	down	--	--	Molecular Function: DNA binding (GO:0003677);; Cellular Component: nucleus (GO:0005634);; Biological Process: regulation of transcription, DNA-templated (GO:0006355);;	K00521|1.8e-37|cmos:111447866|K00521 ferric-chelate reductase [EC:1.16.1.7] | (RefSeq) ferric reduction oxidase 7, chloroplastic-like	--	--	--	No apical meristem (NAM) protein	Protein CUP-SHAPED COTYLEDON 3 OS=Arabidopsis thaliana OX=3702 GN=NAC031 PE=1 SV=1	K	Transcription	protein CUP-SHAPED COTYLEDON 3 [Populus trichocarpa]
gene-POPTR_011G115400	NAC098	1.52523	0.471343	0.713443	-1.56296	down	--	--	-0.938415	normal	--	--	Molecular Function: DNA binding (GO:0003677);; Cellular Component: nucleus (GO:0005634);; Biological Process: regulation of transcription, DNA-templated (GO:0006355);;	K00521|2.2e-37|cmos:111447866|K00521 ferric-chelate reductase [EC:1.16.1.7] | (RefSeq) ferric reduction oxidase 7, chloroplastic-like	--	--	--	No apical meristem (NAM) protein	Protein CUP-SHAPED COTYLEDON 2 OS=Arabidopsis thaliana OX=3702 GN=NAC098 PE=1 SV=1	K	Transcription	protein CUP-SHAPED COTYLEDON 2 [Populus trichocarpa]

## Sheet: (c) bHLH
(c) Detailed list of DEGs encoding bHLH transcription factors during secondary growth of "84K" poplar stems
gene ID	gene name	stage 1 FPKM	stage 2 FPKM	stage 3 FPKM	stage 1 versus stage 2 log2FC	stage 1 versus stage 2 regulated	stage 2 versus stage 3 log2FC	stage 2 versus stage 3 regulated	stage 1 versus stage3 log2FC	stage 1 versus stage3 regulated	COG class	COG class_annotation	GO annotation	KEGG annotation	KEGG pathway annotation	KOG class	KOG class annotation	Pfam annotation	Swiss Prot annotation	eggNOG class	eggNOG class annotation	NR annotation
POPTR_010G208600	bHLH110	0.05	2.07	7.73	2.54	up	1.72	up	3.66	up	--	--	Molecular Function: transcriptional activator activity, RNA polymerase II transcription regulatory region sequence-specific binding (GO:0001228);; Cellular Component: nucleus (GO:0005634);; Molecular Function: protein dimerization activity (GO:0046983);;	K05765|6.7e-31|fve:101301142|K05765 cofilin | (RefSeq) uncharacterized LOC101301142	--	--	--	--	Transcription factor bHLH110 OS=Arabidopsis thaliana OX=3702 GN=BHLH110 PE=2 SV=2	K	Transcription	transcription factor bHLH113 isoform X1 [Populus trichocarpa]
POPTR_005G071100	bHLH94	1.87	9.7	28.71	2.39	up	1.51	up	3.98	up	--	--	Molecular Function: protein dimerization activity (GO:0046983);;	K20558|1.8e-23|atr:18437056|K20558 transcription factor SPEECHLESS | (RefSeq) transcription factor SPEECHLESS isoform X2	MAPK signaling pathway - plant (ko04016)	--	--	Helix-loop-helix DNA-binding domain	Transcription factor bHLH94 OS=Arabidopsis thaliana OX=3702 GN=BHLH94 PE=1 SV=2	K	Transcription	hypothetical protein POPTR_005G071100 [Populus trichocarpa]
POPTR_009G094300	bHLH113	0.24	1.61	1.97	2.64	up	0.23	normal	2.95	up	--	--	Molecular Function: transcriptional activator activity, RNA polymerase II transcription regulatory region sequence-specific binding (GO:0001228);; Cellular Component: nucleus (GO:0005634);; Molecular Function: protein dimerization activity (GO:0046983);;	K05765|1.1e-12|gra:105781290|K05765 cofilin | (RefSeq) uncharacterized LOC105781290	--	--	--	--	Transcription factor bHLH113 OS=Arabidopsis thaliana OX=3702 GN=BHLH113 PE=2 SV=1	K	Transcription	transcription factor bHLH113 [Populus trichocarpa]
POPTR_006G074900	bHLH35	0.32	1.79	2.45	2.42	up	0.34	normal	2.83	up	--	--	Molecular Function: protein dimerization activity (GO:0046983);;	K13422|6.9e-13|ppp:112288376|K13422 transcription factor MYC2 | (RefSeq) transcription factor MYC3-like isoform X1	MAPK signaling pathway - plant (ko04016);; Plant hormone signal transduction (ko04075)	--	--	Helix-loop-helix DNA-binding domain	Transcription factor bHLH35 OS=Arabidopsis thaliana OX=3702 GN=BHLH35 PE=2 SV=1	K	Transcription	transcription factor bHLH35 isoform X1 [Populus trichocarpa]
POPTR_011G033000	bHLH112	1.14	5.07	6.08	2.18	up	0.26	normal	2.48	up	--	--	Molecular Function: protein dimerization activity (GO:0046983);;	K05765|8.9e-15|gra:105781290|K05765 cofilin | (RefSeq) uncharacterized LOC105781290	--	--	--	--	Transcription factor bHLH112 OS=Arabidopsis thaliana OX=3702 GN=BHLH112 PE=1 SV=1	K	Transcription	transcription factor bHLH112 isoform X2 [Populus trichocarpa]
POPTR_004G029100	bHLH112	5.92	16.25	17.72	1.49	up	0.14	normal	1.67	up	--	--	Molecular Function: protein dimerization activity (GO:0046983);;	--	--	--	--	--	Transcription factor bHLH112 OS=Arabidopsis thaliana OX=3702 GN=BHLH112 PE=1 SV=1	K	Transcription	hypothetical protein POPTR_004G029100 [Populus trichocarpa]
POPTR_010G186700	bHLH51	11.45	30.58	35.53	1.47	up	0.23	normal	1.73	up	--	--	Molecular Function: protein dimerization activity (GO:0046983);;	K22484|4.0e-25|pvu:PHAVU_001G121200g|K22484 transcriptional regulator CBF1 | (RefSeq) hypothetical protein	--	--	--	Helix-loop-helix DNA-binding domain	Transcription factor bHLH51 OS=Arabidopsis thaliana OX=3702 GN=BHLH51 PE=2 SV=1	K	Transcription	transcription factor bHLH51 [Populus trichocarpa]
POPTR_002G032400	bHLH110	4.99	10.43	11.37	1.1	up	0.14	normal	1.28	up	--	--	Molecular Function: transcriptional activator activity, RNA polymerase II transcription regulatory region sequence-specific binding (GO:0001228);; Cellular Component: nucleus (GO:0005634);; Molecular Function: protein dimerization activity (GO:0046983);;	K05765|2.4e-14|gra:105781290|K05765 cofilin | (RefSeq) uncharacterized LOC105781290	--	--	--	--	Transcription factor bHLH110 OS=Arabidopsis thaliana OX=3702 GN=BHLH110 PE=2 SV=2	K	Transcription	transcription factor bHLH110 isoform X2 [Populus trichocarpa]
POPTR_018G083700	bHLH68	31.77	61.49	66.92	1	up	0.13	normal	1.18	up	--	--	Molecular Function: transcriptional activator activity, RNA polymerase II transcription regulatory region sequence-specific binding (GO:0001228);; Cellular Component: nucleus (GO:0005634);; Molecular Function: protein dimerization activity (GO:0046983);;	K14638|7.1e-25|egr:104449894|K14638 solute carrier family 15 (peptide/histidine transporter), member 3/4 | (RefSeq) protein NRT1/ PTR FAMILY 1.2	--	--	--	--	Transcription factor bHLH68 OS=Arabidopsis thaliana OX=3702 GN=BHLH68 PE=1 SV=2	K	Transcription	transcription factor bHLH68 [Populus trichocarpa]
POPTR_006G037100	bHLH106	11	20.16	20.82	0.92	normal	1.02	up	0.06	up	--	--	Molecular Function: protein dimerization activity (GO:0046983);;	K22484|2.3e-83|gab:108472703|K22484 transcriptional regulator CBF1 | (RefSeq) transcription factor bHLH106	--	[K]	Transcription	Helix-loop-helix DNA-binding domain	Transcription factor bHLH106 OS=Arabidopsis thaliana OX=3702 GN=BHLH106 PE=2 SV=1	K	Transcription	transcription factor bHLH106 [Populus trichocarpa]
POPTR_006G057600	bHLH130	0.82	1.03	1.97	0.36	normal	1.34	up	0.8	up	--	--	Molecular Function: protein dimerization activity (GO:0046983);;	K18878|6.6e-09|cann:107866053|K18878 BHLH transcription factor Upa20 | (RefSeq) Upa20; transcription factor bHLH137-like	Plant-pathogen interaction (ko04626)	--	--	Helix-loop-helix DNA-binding domain	Transcription factor bHLH130 OS=Arabidopsis thaliana OX=3702 GN=BHLH130 PE=1 SV=1	K	Transcription	transcription factor bHLH130 isoform X2 [Populus trichocarpa]
POPTR_019G112000	bHLH153	6.88	9.47	15.32	0.51	normal	0.64	normal	1.24	up	--	--	Molecular Function: transcriptional activator activity, RNA polymerase II transcription regulatory region sequence-specific binding (GO:0001228);; Cellular Component: nucleus (GO:0005634);; Molecular Function: protein dimerization activity (GO:0046983);;	K05765|5.5e-16|gra:105781290|K05765 cofilin | (RefSeq) uncharacterized LOC105781290	--	--	--	--	Transcription factor bHLH153 OS=Arabidopsis thaliana OX=3702 GN=BHLH153 PE=1 SV=1	K	Transcription	transcription factor bHLH153 [Populus trichocarpa]
POPTR_010G098932	bHLH111	0.13	2.11	1.28	3.71	up	-0.36	normal	--	--	--	--	Molecular Function: protein dimerization activity (GO:0046983);;	K05765|1.3e-15|gra:105781290|K05765 cofilin | (RefSeq) uncharacterized LOC105781290	--	--	--	--	Transcription factor bHLH111 OS=Arabidopsis thaliana OX=3702 GN=BHLH111 PE=2 SV=1	K	Transcription	hypothetical protein POPTR_010G098932 [Populus trichocarpa]
POPTR_008G070800	bHLH51	13.11	93.44	87.64	2.88	up	-0.07	normal	2.83	up	--	--	Molecular Function: protein dimerization activity (GO:0046983);;	K22484|4.4e-24|pvu:PHAVU_001G121200g|K22484 transcriptional regulator CBF1 | (RefSeq) hypothetical protein	--	--	--	Helix-loop-helix DNA-binding domain	Transcription factor bHLH51 OS=Arabidopsis thaliana OX=3702 GN=BHLH51 PE=2 SV=1	K	Transcription	transcription factor bHLH51 isoform X1 [Populus trichocarpa]
POPTR_018G141700	bHLH35	1.44	8.38	4.25	2.55	up	-0.7	normal	1.59	up	--	--	Molecular Function: protein dimerization activity (GO:0046983);;	K13422|1.0e-10|ppp:112288376|K13422 transcription factor MYC2 | (RefSeq) transcription factor MYC3-like isoform X1	MAPK signaling pathway - plant (ko04016);; Plant hormone signal transduction (ko04075)	--	--	Helix-loop-helix DNA-binding domain	Transcription factor bHLH35 OS=Arabidopsis thaliana OX=3702 GN=BHLH35 PE=2 SV=1	K	Transcription	transcription factor bHLH35 [Populus trichocarpa]
POPTR_002G105300	bHLH30	0.7	3.83	2.51	2.44	up	-0.5	normal	1.87	up	--	--	Molecular Function: protein dimerization activity (GO:0046983);;	K22484|2.3e-21|pvu:PHAVU_001G121200g|K22484 transcriptional regulator CBF1 | (RefSeq) hypothetical protein	--	--	--	Helix-loop-helix DNA-binding domain	Transcription factor bHLH30 OS=Arabidopsis thaliana OX=3702 GN=BHLH30 PE=1 SV=1	K	Transcription	transcription factor bHLH30 [Populus trichocarpa]
POPTR_003G207200	bHLH122	7.37	33.98	24.11	2.21	up	-0.21	normal	1.61	up	--	--	Molecular Function: protein dimerization activity (GO:0046983);;	K18878|6.6e-09|cann:107866053|K18878 BHLH transcription factor Upa20 | (RefSeq) Upa20; transcription factor bHLH137-like	Plant-pathogen interaction (ko04626)	--	--	Helix-loop-helix DNA-binding domain	Transcription factor bHLH122 OS=Arabidopsis thaliana OX=3702 GN=BHLH122 PE=1 SV=1	K	Transcription	transcription factor bHLH122 isoform X1 [Populus trichocarpa]
POPTR_002G248500	bHLH62	2.33	8.39	8.18	1.89	up	-0.02	normal	1.89	up	--	--	Molecular Function: transcription factor activity, sequence-specific DNA binding (GO:0003700);; Cellular Component: nucleus (GO:0005634);; Molecular Function: protein dimerization activity (GO:0046983);;	K18878|5.7e-32|cann:107866053|K18878 BHLH transcription factor Upa20 | (RefSeq) Upa20; transcription factor bHLH137-like	Plant-pathogen interaction (ko04626)	--	--	Helix-loop-helix DNA-binding domain	Transcription factor bHLH62 OS=Arabidopsis thaliana OX=3702 GN=BHLH62 PE=2 SV=1	K	Transcription	transcription factor bHLH62 [Populus trichocarpa]
POPTR_007G020200	bHLH110	0.39	1.34	0.91	1.78	up	-0.44	normal	1.28	up	--	--	Molecular Function: protein dimerization activity (GO:0046983);;	K05765|1.7e-14|gra:105781290|K05765 cofilin | (RefSeq) uncharacterized LOC105781290	--	--	--	--	Transcription factor bHLH110 OS=Arabidopsis thaliana OX=3702 GN=BHLH110 PE=2 SV=2	S	Function unknown	transcription factor bHLH110 isoform X1 [Populus trichocarpa]
POPTR_001G299300	bHLH113	0.39	1.37	1.17	1.77	up	-0.18	normal	1.57	up	--	--	Molecular Function: transcriptional activator activity, RNA polymerase II transcription regulatory region sequence-specific binding (GO:0001228);; Cellular Component: nucleus (GO:0005634);; Molecular Function: protein dimerization activity (GO:0046983);;	K05765|6.6e-12|gra:105781290|K05765 cofilin | (RefSeq) uncharacterized LOC105781290	--	--	--	--	Transcription factor bHLH113 OS=Arabidopsis thaliana OX=3702 GN=BHLH113 PE=2 SV=1	K	Transcription	transcription factor bHLH113 [Populus trichocarpa]
POPTR_003G051600	bHLH68	9.58	30.17	28.31	1.7	up	-0.07	normal	1.66	up	--	--	Molecular Function: protein dimerization activity (GO:0046983);;	K14638|1.8e-40|egr:104449894|K14638 solute carrier family 15 (peptide/histidine transporter), member 3/4 | (RefSeq) protein NRT1/ PTR FAMILY 1.2	--	--	--	--	Transcription factor bHLH68 OS=Arabidopsis thaliana OX=3702 GN=BHLH68 PE=1 SV=2	K	Transcription	transcription factor bHLH68 isoform X1 [Populus trichocarpa]
POPTR_018G141800	bHLH35	8.01	22.59	19.76	1.54	up	-0.17	normal	1.4	up	--	--	Molecular Function: protein dimerization activity (GO:0046983);;	K13422|2.6e-13|csv:101205372|K13422 transcription factor MYC2 | (RefSeq) transcription factor MYC2	MAPK signaling pathway - plant (ko04016);; Plant hormone signal transduction (ko04075)	--	--	Helix-loop-helix DNA-binding domain	Transcription factor bHLH35 OS=Arabidopsis thaliana OX=3702 GN=BHLH35 PE=2 SV=1	K	Transcription	transcription factor bHLH35 [Populus trichocarpa]
POPTR_002G108400	bHLH93	11.15	29.63	24.23	1.46	up	-0.26	normal	1.22	up	--	--	Molecular Function: protein dimerization activity (GO:0046983);;	K16190|8.9e-12|bdi:100843665|K16190 glucuronokinase [EC:2.7.1.43] | (RefSeq) transcription factor TDR	Pentose and glucuronate interconversions (ko00040);; Ascorbate and aldarate metabolism (ko00053);; Amino sugar and nucleotide sugar metabolism (ko00520)	--	--	Helix-loop-helix DNA-binding domain	Transcription factor bHLH93 OS=Arabidopsis thaliana OX=3702 GN=BHLH93 PE=1 SV=1	K	Transcription	transcription factor bHLH93 [Populus trichocarpa]
POPTR_005G039800	bHLH94	3.78	9.51	6.56	1.38	up	-0.48	normal	0.89	normal	--	--	Molecular Function: protein dimerization activity (GO:0046983);;	K20558|1.0e-28|hbr:110645927|K20558 transcription factor SPEECHLESS | (RefSeq) transcription factor SPEECHLESS-like	MAPK signaling pathway - plant (ko04016)	--	--	Helix-loop-helix DNA-binding domain	Transcription factor bHLH94 OS=Arabidopsis thaliana OX=3702 GN=BHLH94 PE=1 SV=2	K	Transcription	transcription factor bHLH94 [Populus trichocarpa]
POPTR_006G186600	bHLH66	4.61	9.64	6.36	1.11	up	-0.56	normal	0.56	normal	--	--	Molecular Function: transcriptional activator activity, RNA polymerase II transcription regulatory region sequence-specific binding (GO:0001228);; Cellular Component: nucleus (GO:0005634);; Molecular Function: protein dimerization activity (GO:0046983);;	K12126|2.5e-14|smo:SELMODRAFT_114141|K12126 phytochrome-interacting factor 3 | (RefSeq) PIF3; hypothetical protein	Plant hormone signal transduction (ko04075);; Circadian rhythm - plant (ko04712)	--	--	Helix-loop-helix DNA-binding domain	bHLH transcription factor RHL1 OS=Lotus japonicus OX=34305 GN=RHL1 PE=2 SV=1	K	Transcription	transcription factor bHLH66 [Populus trichocarpa]
POPTR_013G007700	bHLH149	11.21	23.21	16.39	1.1	up	-0.45	normal	0.64	normal	--	--	Molecular Function: protein dimerization activity (GO:0046983);;	--	--	--	--	--	Transcription factor bHLH149 OS=Arabidopsis thaliana OX=3702 GN=BHLH149 PE=1 SV=1	K	Transcription	transcription factor bHLH149 [Populus trichocarpa]
POPTR_001G216900	LHW	29.199	68.9794	59.2848	1.29259	up	1.12379	up	-0.19679	normal	--	--	Molecular Function: transcription factor activity, sequence-specific DNA binding (GO:0003700);; Cellular Component: nucleus (GO:0005634);; Molecular Function: protein dimerization activity (GO:0046983);; Biological Process: root development (GO:0048364);;	K13422|4.1e-06|hbr:110661058|K13422 transcription factor MYC2 | (RefSeq) transcription factor MYC2-like	MAPK signaling pathway - plant (ko04016);; Plant hormone signal transduction (ko04075)	--	--	bHLH-MYC and R2R3-MYB transcription factors N-terminal	Transcription factor LHW OS=Arabidopsis thaliana OX=3702 GN=LHW PE=1 SV=1	S	Function unknown	transcription factor LHW isoform X1 [Populus trichocarpa]
POPTR_004G156000	bHLH63	31.09	53.48	19.28	0.83	normal	-1.42	down	-0.58	normal	--	--	Biological Process: regulation of transcription, DNA-templated (GO:0006355);; Molecular Function: protein dimerization activity (GO:0046983);;	K18878|9.7e-32|cann:107866053|K18878 BHLH transcription factor Upa20 | (RefSeq) Upa20; transcription factor bHLH137-like	Plant-pathogen interaction (ko04626)	--	--	Helix-loop-helix DNA-binding domain	Transcription factor bHLH63 OS=Arabidopsis thaliana OX=3702 GN=BHLH63 PE=1 SV=1	K	Transcription	transcription factor bHLH63 [Populus trichocarpa]
POPTR_016G051100	bHLH48	19.66	9.25	4.32	-1.03	down	-1	down	-2.07	down	--	--	Molecular Function: transcription factor activity, sequence-specific DNA binding (GO:0003700);; Cellular Component: nucleus (GO:0005634);; Molecular Function: protein dimerization activity (GO:0046983);;	K18878|4.4e-27|cann:107866053|K18878 BHLH transcription factor Upa20 | (RefSeq) Upa20; transcription factor bHLH137-like	Plant-pathogen interaction (ko04626)	--	--	Helix-loop-helix DNA-binding domain	Transcription factor bHLH48 OS=Arabidopsis thaliana OX=3702 GN=BHLH48 PE=2 SV=1	K	Transcription	transcription factor bHLH48 [Populus trichocarpa]
POPTR_006G202100	bHLH10	1.47	0.15	0.16	-3.12	down	-2.79	down	--	--	--	--	Molecular Function: protein dimerization activity (GO:0046983);;	K13422|4.1e-12|mesc:110617878|K13422 transcription factor MYC2 | (RefSeq) transcription factor MYC2-like	MAPK signaling pathway - plant (ko04016);; Plant hormone signal transduction (ko04075)	--	--	Helix-loop-helix DNA-binding domain	Transcription factor bHLH10 OS=Arabidopsis thaliana OX=3702 GN=BHLH10 PE=1 SV=1	K	Transcription	transcription factor bHLH91 [Populus trichocarpa]
POPTR_013G025900	bHLH94	6.31	2.36	2.23	-1.35	down	-0.05	normal	-1.36	down	--	--	Molecular Function: protein dimerization activity (GO:0046983);;	K20558|1.4e-28|hbr:110645927|K20558 transcription factor SPEECHLESS | (RefSeq) transcription factor SPEECHLESS-like	MAPK signaling pathway - plant (ko04016)	--	--	Helix-loop-helix DNA-binding domain	Transcription factor bHLH94 OS=Arabidopsis thaliana OX=3702 GN=BHLH94 PE=1 SV=2	K	Transcription	transcription factor bHLH94 [Populus trichocarpa]
POPTR_002G05410	bHLH42	3.3	0.88	0.82	-1.83	down	-0.07	normal	-1.87	down	--	--	Molecular Function: protein dimerization activity (GO:0046983);;	K13422|5.0e-38|ppp:112290701|K13422 transcription factor MYC2 | (RefSeq) transcription factor MYC4-like	MAPK signaling pathway - plant (ko04016);; Plant hormone signal transduction (ko04075)	--	--	bHLH-MYC and R2R3-MYB transcription factors N-terminal	Transcription factor BHLH42 OS=Actinidia chinensis var. chinensis OX=1590841 GN=BHLH42 PE=1 SV=1	K	Transcription	basic helix-loop-helix protein A [Populus trichocarpa]
POPTR_001G141100	bHLH71	6.31	0.79	0.69	-2.91	down	-0.12	normal	-2.98	down	--	--	Molecular Function: protein dimerization activity (GO:0046983);;	K20558|7.3e-24|aip:107647565|K20558 transcription factor SPEECHLESS | (RefSeq) transcription factor SPEECHLESS-like	MAPK signaling pathway - plant (ko04016)	--	--	Helix-loop-helix DNA-binding domain	Transcription factor bHLH71 OS=Arabidopsis thaliana OX=3702 GN=BHLH71 PE=1 SV=1	K	Transcription	hypothetical protein POPTR_001G141100 [Populus trichocarpa]
POPTR_003G093200	bHLH71	17.24	0.3	0.03	-5.68	down	--	normal	-5.12	down	--	--	Molecular Function: protein dimerization activity (GO:0046983);;	K20558|2.3e-27|rcu:8274388|K20558 transcription factor SPEECHLESS | (RefSeq) transcription factor SPEECHLESS	MAPK signaling pathway - plant (ko04016)	--	--	Helix-loop-helix DNA-binding domain	Transcription factor bHLH71 OS=Arabidopsis thaliana OX=3702 GN=BHLH71 PE=1 SV=1	K	Transcription	transcription factor bHLH71 [Populus trichocarpa]
POPTR_002G180300	bHLH70	9.4	0.41	0.31	-4.38	down	-0.21	normal	-4.67	down	--	--	Molecular Function: protein dimerization activity (GO:0046983);;	K20558|1.8e-25|atr:18437056|K20558 transcription factor SPEECHLESS | (RefSeq) transcription factor SPEECHLESS isoform X2	MAPK signaling pathway - plant (ko04016)	--	--	Helix-loop-helix DNA-binding domain	Transcription factor bHLH70 OS=Arabidopsis thaliana OX=3702 GN=BHLH70 PE=2 SV=1	K	Transcription	transcription factor bHLH70 isoform X3 [Populus trichocarpa]
POPTR_014G106300	bHLH67	4.94	0.36	0.5	-3.68	down	0.32	normal	-3.1	down	--	--	Molecular Function: protein dimerization activity (GO:0046983);;	K20558|2.5e-27|adu:107495120|K20558 transcription factor SPEECHLESS | (RefSeq) transcription factor SPEECHLESS	MAPK signaling pathway - plant (ko04016)	--	--	Helix-loop-helix DNA-binding domain	Transcription factor bHLH67 OS=Arabidopsis thaliana OX=3702 GN=BHLH67 PE=2 SV=1	K	Transcription	transcription factor bHLH67 isoform X1 [Populus trichocarpa]
POPTR_016G06850	bHLH91	0.51	0.07	0.06	-2.62	down	--	--	-2.64	down	--	--	Molecular Function: protein dimerization activity (GO:0046983);;	K13422|1.9e-12|dcr:108196536|K13422 transcription factor MYC2 | (RefSeq) transcription factor MYC4	MAPK signaling pathway - plant (ko04016);; Plant hormone signal transduction (ko04075)	--	--	Helix-loop-helix DNA-binding domain	Transcription factor bHLH91 OS=Arabidopsis thaliana OX=3702 GN=BHLH91 PE=2 SV=1	K	Transcription	transcription factor bHLH91 isoform X1 [Populus trichocarpa]
POPTR_012G079100	bHLH162	2.43	0.78	0.51	-1.53	down	--	--	-2.06	down	--	--	Molecular Function: RNA polymerase II regulatory region sequence-specific DNA binding (GO:0000977);; Biological Process: regulation of transcription from RNA polymerase II promoter (GO:0006357);; Molecular Function: transcription factor binding (GO:0008134);; Molecular Function: protein dimerization activity (GO:0046983);; Cellular Component: RNA polymerase II transcription factor complex (GO:009…	--	--	--	--	Helix-loop-helix DNA-binding domain	Transcription factor bHLH162 OS=Arabidopsis thaliana OX=3702 GN=BHLH162 PE=1 SV=1	K	Transcription	transcription factor bHLH162 [Populus trichocarpa]
POPTR_008G190800	bHLH089	1.53	0.6	0.39	-1.26	normal	--	--	-1.75	down	--	--	Molecular Function: transcription factor activity, sequence-specific DNA binding (GO:0003700);; Cellular Component: nucleus (GO:0005634);; Molecular Function: protein dimerization activity (GO:0046983);;	K18878|1.1e-28|cann:107866053|K18878 BHLH transcription factor Upa20 | (RefSeq) Upa20; transcription factor bHLH137-like	Plant-pathogen interaction (ko04626)	--	--	Helix-loop-helix DNA-binding domain	Transcription factor BHLH089 OS=Oryza sativa subsp. japonica OX=39947 GN=BHLH089 PE=1 SV=1	K	Transcription	transcription factor BHLH094 isoform X1 [Populus trichocarpa]
POPTR_009G117300	bHLH63	33.81	29.67	12.81	-0.14	normal	-1.16	down	-1.29	down	--	--	Biological Process: regulation of transcription, DNA-templated (GO:0006355);; Molecular Function: protein dimerization activity (GO:0046983);;	K18878|1.7e-31|cann:107866053|K18878 BHLH transcription factor Upa20 | (RefSeq) Upa20; transcription factor bHLH137-like	Plant-pathogen interaction (ko04626)	--	--	Helix-loop-helix DNA-binding domain	Transcription factor bHLH63 OS=Arabidopsis thaliana OX=3702 GN=BHLH63 PE=1 SV=1	K	Transcription	transcription factor bHLH63 isoform X2 [Populus trichocarpa]
POPTR_018G090200	bHLH146	3.54	1.98	0.33	-0.77	normal	-1.25	down	-3.02	down	--	--	Molecular Function: molecular_function (GO:0003674);; Molecular Function: transcription factor activity, sequence-specific DNA binding (GO:0003700);; Biological Process: regulation of transcription, DNA-templated (GO:0006355);; Biological Process: biological_process (GO:0008150);; Biological Process: regulation of biosynthetic process (GO:0009889);; Biological Process: regulation of gene expressi…	--	--	--	--	--	Transcription factor bHLH146 OS=Arabidopsis thaliana OX=3702 GN=BHLH146 PE=2 SV=1	S	Function unknown	transcription factor bHLH146 [Populus trichocarpa]
POPTR_001G191800	bHLH87	2	1.32	0.47	-0.54	normal	-0.98	normal	-1.87	down	--	--	Molecular Function: protein dimerization activity (GO:0046983);;	K16189|1.1e-06|ats:109775123|K16189 phytochrome-interacting factor 4 | (RefSeq) LOC109775123; transcription factor PIF4-like	Plant hormone signal transduction (ko04075)	--	--	Helix-loop-helix DNA-binding domain	Transcription factor bHLH87 OS=Arabidopsis thaliana OX=3702 GN=BHLH87 PE=1 SV=1	K	Transcription	transcription factor bHLH87 [Populus trichocarpa]
POPTR_002G101900	bHLH94	0	0.59	1.34	--	normal	0.81	normal	6.26	up	--	--	Molecular Function: protein dimerization activity (GO:0046983);;	K20558|9.9e-29|adu:107495120|K20558 transcription factor SPEECHLESS | (RefSeq) transcription factor SPEECHLESS	MAPK signaling pathway - plant (ko04016)	--	--	Helix-loop-helix DNA-binding domain	Transcription factor bHLH94 OS=Arabidopsis thaliana OX=3702 GN=BHLH94 PE=1 SV=2	K	Transcription	transcription factor bHLH94 [Populus trichocarpa]

## Sheet: (d) TCP
(d) Detailed list of DEGs encoding TCP transcription factors during secondary growth of "84K" poplar stems
gene ID	gene name	stage 1 FPKM	stage 2 FPKM	stage 3 FPKM	stage 1 versus stage 2 log2FC	stage 1 versus stage 2 regulated	stage 2 versus stage 3 log2FC	stage 2 versus stage 3 regulated	stage 1 versus stage3 log2FC	stage 1 versus stage3 regulated	COG class	COG class_annotation	GO annotation	KEGG annotation	KEGG pathway annotation	KOG class	KOG class annotation	Pfam annotation	Swiss Prot annotation	eggNOG class	eggNOG class annotation	NR annotation
gene-POPTR_003G167900	TCP20	1.61151	7.03948	9.43633	2.14664	up	0.396593	normal	2.617	up	--	--	Molecular Function: transcription factor activity, sequence-specific DNA binding (GO:0003700);; Cellular Component: nucleus (GO:0005634);; Molecular Function: sequence-specific DNA binding (GO:0043565);;	K16221|9.4e-26|thj:104800669|K16221 transcription factor TCP21 (protein CCA1 HIKING EXPEDITION) | (RefSeq) transcription factor TCP7	Circadian rhythm - plant (ko04712)	--	--	TCP family transcription factor	Transcription factor TCP20 OS=Arabidopsis thaliana OX=3702 GN=TCP20 PE=1 SV=1	K	Transcription	transcription factor TCP20 [Populus trichocarpa]
gene-POPTR_T044100	TCP20	1.22074	5.61603	6.5355	2.18954	up	0.230938	normal	2.46707	up	--	--	Molecular Function: transcription factor activity, sequence-specific DNA binding (GO:0003700);; Cellular Component: nucleus (GO:0005634);; Molecular Function: sequence-specific DNA binding (GO:0043565);;	K16221|9.4e-26|thj:104800669|K16221 transcription factor TCP21 (protein CCA1 HIKING EXPEDITION) | (RefSeq) transcription factor TCP7	Circadian rhythm - plant (ko04712)	--	--	TCP family transcription factor	Transcription factor TCP20 OS=Arabidopsis thaliana OX=3702 GN=TCP20 PE=1 SV=1	K	Transcription	transcription factor TCP20 [Populus trichocarpa]
gene-POPTR_001G327100	TCP20	25.1471	68.5408	80.0823	1.49797	up	0.232752	normal	1.77196	up	--	--	Molecular Function: transcription factor activity, sequence-specific DNA binding (GO:0003700);; Cellular Component: nucleus (GO:0005634);; Molecular Function: sequence-specific DNA binding (GO:0043565);;	K16221|2.6e-26|nnu:104589565|K16221 transcription factor TCP21 (protein CCA1 HIKING EXPEDITION) | (RefSeq) transcription factor TCP7-like	Circadian rhythm - plant (ko04712)	--	--	TCP family transcription factor	Transcription factor TCP20 OS=Arabidopsis thaliana OX=3702 GN=TCP20 PE=1 SV=1	K	Transcription	transcription factor TCP20 [Populus trichocarpa]
gene-POPTR_008G115800	TCP12	0.777647	2.23338	1.95065	1.54746	up	-0.137001	normal	1.3838	up	--	--	Molecular Function: transcription factor activity, sequence-specific DNA binding (GO:0003700);; Cellular Component: nucleus (GO:0005634);; Molecular Function: sequence-specific DNA binding (GO:0043565);; Biological Process: regulation of shoot system development (GO:0048831);; Biological Process: regulation of secondary shoot formation (GO:2000032);;	--	--	--	--	TCP family transcription factor	Transcription factor TCP12 OS=Arabidopsis thaliana OX=3702 GN=TCP12 PE=2 SV=1	K	Transcription	transcription factor TCP12 [Populus trichocarpa]
gene-POPTR_015G050500	TCP12	2.02005	4.83016	5.02701	1.28973	up	0.0685554	normal	1.39858	up	--	--	Molecular Function: transcription factor activity, sequence-specific DNA binding (GO:0003700);; Cellular Component: nucleus (GO:0005634);; Molecular Function: sequence-specific DNA binding (GO:0043565);; Biological Process: regulation of shoot system development (GO:0048831);; Biological Process: regulation of secondary shoot formation (GO:2000032);;	--	--	--	--	TCP family transcription factor	Transcription factor TCP12 OS=Arabidopsis thaliana OX=3702 GN=TCP12 PE=2 SV=1	K	Transcription	transcription factor TCP12 [Populus trichocarpa]
gene-POPTR_001G060000	TCP20	0.953627	7.42597	12.8814	2.9893	up	0.778788	normal	3.82445	up	--	--	Molecular Function: transcription factor activity, sequence-specific DNA binding (GO:0003700);; Cellular Component: nucleus (GO:0005634);; Molecular Function: sequence-specific DNA binding (GO:0043565);;	K16221|1.7e-27|nnu:104592127|K16221 transcription factor TCP21 (protein CCA1 HIKING EXPEDITION) | (RefSeq) transcription factor TCP7	Circadian rhythm - plant (ko04712)	--	--	TCP family transcription factor	Transcription factor TCP20 OS=Arabidopsis thaliana OX=3702 GN=TCP20 PE=1 SV=1	K	Transcription	transcription factor TCP20 [Populus trichocarpa]
gene-POPTR_001G375800	TCP4	25.7485	2.99887	2.30431	-3.04137	down	-0.332312	normal	-3.35927	down	--	--	Molecular Function: transcription factor activity, sequence-specific DNA binding (GO:0003700);; Cellular Component: nucleus (GO:0005634);; Biological Process: leaf morphogenesis (GO:0009965);; Biological Process: cell differentiation (GO:0030154);; Molecular Function: sequence-specific DNA binding (GO:0043565);; Biological Process: positive regulation of development, heterochronic (GO:0045962);; …	--	--	--	--	TCP family transcription factor	Transcription factor TCP4 OS=Arabidopsis thaliana OX=3702 GN=TCP4 PE=1 SV=1	K	Transcription	transcription factor TCP4 [Populus trichocarpa]
gene-POPTR_T146100	TCP13	4.36248	0.186179	0.31864	-4.38392	down	--	--	-3.52642	down	--	--	Molecular Function: transcription factor activity, sequence-specific DNA binding (GO:0003700);; Cellular Component: nucleus (GO:0005634);; Molecular Function: sequence-specific DNA binding (GO:0043565);;	--	--	--	--	TCP family transcription factor	Transcription factor TCP13 OS=Arabidopsis thaliana OX=3702 GN=TCP13 PE=1 SV=1	K	Transcription	transcription factor TCP13 isoform X1 [Populus trichocarpa]
gene-POPTR_011G096600	TCP4	4.18376	0.824668	0.834827	-2.25912	down	0.0278531	normal	-2.18612	down	--	--	Molecular Function: transcription factor activity, sequence-specific DNA binding (GO:0003700);; Cellular Component: nucleus (GO:0005634);; Biological Process: leaf morphogenesis (GO:0009965);; Biological Process: cell differentiation (GO:0030154);; Molecular Function: sequence-specific DNA binding (GO:0043565);; Biological Process: positive regulation of development, heterochronic (GO:0045962);; …	--	--	--	--	TCP family transcription factor	Transcription factor TCP4 OS=Arabidopsis thaliana OX=3702 GN=TCP4 PE=1 SV=1	K	Transcription	transcription factor TCP4 [Populus trichocarpa]
gene-POPTR_013G119400	TCP4	16.7274	2.63743	2.93946	-2.60064	down	0.143213	normal	-2.379	down	--	--	Molecular Function: transcription factor activity, sequence-specific DNA binding (GO:0003700);; Cellular Component: nucleus (GO:0005634);; Molecular Function: sequence-specific DNA binding (GO:0043565);; Biological Process: regulation of shoot system development (GO:0048831);; Biological Process: regulation of secondary shoot formation (GO:2000032);;	--	--	--	--	TCP family transcription factor	Transcription factor TCP4 OS=Arabidopsis thaliana OX=3702 GN=TCP4 PE=1 SV=1	K	Transcription	transcription factor TCP4 [Populus trichocarpa]
gene-POPTR_004G065800	TCP2	21.0287	9.19158	7.05889	-1.10778	down	-0.294412	normal	-1.37844	down	--	--	Molecular Function: transcription factor activity, sequence-specific DNA binding (GO:0003700);; Cellular Component: nucleus (GO:0005634);; Molecular Function: sequence-specific DNA binding (GO:0043565);;	--	--	--	--	TCP family transcription factor	Transcription factor TCP2 OS=Arabidopsis thaliana OX=3702 GN=TCP2 PE=1 SV=1	K	Transcription	transcription factor TCP2 [Populus trichocarpa]
gene-POPTR_019G091300	TCP3	15.4496	4.5744	4.89542	-1.69625	down	0.105419	normal	-1.53317	down	--	--	Molecular Function: transcription factor activity, sequence-specific DNA binding (GO:0003700);; Cellular Component: nucleus (GO:0005634);; Molecular Function: sequence-specific DNA binding (GO:0043565);; Biological Process: regulation of shoot system development (GO:0048831);; Biological Process: regulation of secondary shoot formation (GO:2000032);;	--	--	--	--	TCP family transcription factor	Transcription factor TCP3 OS=Arabidopsis thaliana OX=3702 GN=TCP3 PE=1 SV=1	K	Transcription	transcription factor TCP4 [Populus trichocarpa]
gene-POPTR_017G094800	TCP13	2.4377	0	0.007219	-7.47272	down	--	--	-6.54568	down	--	--	Molecular Function: transcription factor activity, sequence-specific DNA binding (GO:0003700);; Cellular Component: nucleus (GO:0005634);; Molecular Function: sequence-specific DNA binding (GO:0043565);;	--	--	--	--	TCP family transcription factor	Transcription factor TCP13 OS=Arabidopsis thaliana OX=3702 GN=TCP13 PE=1 SV=1	K	Transcription	transcription factor TCP13 [Populus trichocarpa]
gene-POPTR_002G152200	TCP9	5.61642	3.31948	1.90038	-0.69711	normal	-0.679551	normal	-1.43135	down	--	--	Molecular Function: transcription factor activity, sequence-specific DNA binding (GO:0003700);; Cellular Component: nucleus (GO:0005634);; Biological Process: regulation of cell size (GO:0008361);; Molecular Function: sequence-specific DNA binding (GO:0043565);; Biological Process: root development (GO:0048364);; Biological Process: negative regulation of leaf senescence (GO:1900056);;	K16221|4.9e-26|cmo:103501575|K16221 transcription factor TCP21 (protein CCA1 HIKING EXPEDITION) | (RefSeq) transcription factor TCP21-like	Circadian rhythm - plant (ko04712)	--	--	TCP family transcription factor	Transcription factor TCP9 OS=Arabidopsis thaliana OX=3702 GN=TCP9 PE=1 SV=1	K	Transcription	transcription factor TCP9 [Populus trichocarpa]
gene-POPTR_004G116100	TCP13	2.10885	0.128905	0.159942	-3.76925	down	--	--	-3.31407	down	--	--	Molecular Function: transcription factor activity, sequence-specific DNA binding (GO:0003700);; Cellular Component: nucleus (GO:0005634);; Molecular Function: sequence-specific DNA binding (GO:0043565);;	--	--	--	--	TCP family transcription factor	Transcription factor TCP13 OS=Arabidopsis thaliana OX=3702 GN=TCP13 PE=1 SV=1	K	Transcription	transcription factor TCP13 isoform X1 [Populus trichocarpa]
gene-POPTR_011G083100	TCP2	6.23467	0.854168	0.653026	-2.77897	down	-0.303934	normal	-3.10229	down	--	--	Molecular Function: transcription factor activity, sequence-specific DNA binding (GO:0003700);; Cellular Component: nucleus (GO:0005634);; Molecular Function: sequence-specific DNA binding (GO:0043565);;	--	--	--	--	TCP family transcription factor	Transcription factor TCP2 OS=Arabidopsis thaliana OX=3702 GN=TCP2 PE=1 SV=1	K	Transcription	transcription factor TCP2 [Populus trichocarpa]

## Sheet: (e) WOX
(e) Detailed list of DEGs encoding WOX transcription factors during secondary growth of "84K" poplar stems
gene ID	gene name	stage 1 FPKM	stage 2 FPKM	stage 3 FPKM	stage 1 versus stage 2 log2FC	stage 1 versus stage 2 regulated	stage 2 versus stage 3 log2FC	stage 2 versus stage 3 regulated	stage 1 versus stage3 log2FC	stage 1 versus stage3 regulated	COG class	COG class_annotation	GO annotation	KEGG annotation	KEGG pathway annotation	KOG class	KOG class annotation	Pfam annotation	Swiss Prot annotation	eggNOG class	eggNOG class annotation	NR annotation
gene-POPTR_002G008800	WOX8	4.69216	7.01525	9.84986	0.629756	normal	0.491282	normal	1.17049	up	--	--	Molecular Function: DNA binding (GO:0003677);; Cellular Component: nucleus (GO:0005634);;	--	--	--	--	Homeodomain	WUSCHEL-related homeobox 8 OS=Oryza sativa subsp. japonica OX=39947 GN=WOX8 PE=2 SV=1	K	Transcription	WUSCHEL-related homeobox 8 [Populus trichocarpa]
gene-POPTR_002G124100	WOX4	6.53546	30.427	25.1475	2.26198	up	-0.246532	normal	2.03896	up	--	--	Molecular Function: DNA binding (GO:0003677);; Cellular Component: nucleus (GO:0005634);; Biological Process: tissue development (GO:0009888);;	K14292|3.9e-74|cann:107850838|K14292 trimethylguanosine synthase [EC:2.1.1.-] | (RefSeq) uncharacterized LOC107850838	RNA transport (ko03013)	--	--	Homeodomain	WUSCHEL-related homeobox 4 OS=Arabidopsis thaliana OX=3702 GN=WOX4 PE=1 SV=1	K	Transcription	WUSCHEL-related homeobox 4 [Populus trichocarpa]
gene-POPTR_005G252800	WOX8	5.23636	8.24219	10.1864	0.701947	normal	0.298121	normal	1.05372	up	--	--	Molecular Function: DNA binding (GO:0003677);; Cellular Component: nucleus (GO:0005634);;	--	--	--	--	Homeodomain	WUSCHEL-related homeobox 8 OS=Oryza sativa subsp. japonica OX=39947 GN=WOX8 PE=2 SV=1	K	Transcription	WUSCHEL-related homeobox 8 [Populus trichocarpa]
gene-POPTR_014G025300	WOX4	11.2138	35.219	41.5002	1.69879	up	0.245631	normal	1.98461	up	--	--	Molecular Function: DNA binding (GO:0003677);; Cellular Component: nucleus (GO:0005634);; Biological Process: tissue development (GO:0009888);;	K14292|2.7e-75|cann:107850838|K14292 trimethylguanosine synthase [EC:2.1.1.-] | (RefSeq) uncharacterized LOC107850838	RNA transport (ko03013)	--	--	Homeodomain	WUSCHEL-related homeobox 4 OS=Arabidopsis thaliana OX=3702 GN=WOX4 PE=1 SV=1	K	Transcription	WUSCHEL-related homeobox 4 [Populus trichocarpa]
