# Supplementary material for: Transcriptome and miRNAs Profiles Reveal Regulatory Network and Key Regulators of Secondary Xylem Formation in “84K” Poplar
Source: Int J Mol Sci. 2023 Nov 17;24(22):16438. doi: 10.3390/ijms242216438 (PMC10671414; doi:10.3390/ijms242216438)
Supplement: Supplementary file 1 [file ijms-24-16438-s001.zip › Supplementary Table S4.xlsx]

## Sheet: DEGs number
Supplementary Table S4. Number of differentially expressed genes (DEGs) involved in lignin biosynthesis during secondary growth of "84K" poplar stems
	DEGs	up	down
stage 1 versus stage 2	25	20	5
stage 2 versus stage 3	2	2	0
stage 1 versus stage 3	30	24	6
Detailed list of DEGs involved in lignin biosynthesis during secondary growth in "84K" poplar stems
ID	gene name	stage 1 FPKM	stage 2 FPKM	stage 3 FPKM	stage 1 versus stage 2 log2FC	stage 1 versus stage 2 regulated	stage 2 versus stage 3 log2FC	stage 1 versus stage 2 regulated	stage 1 versus stage 3 log2FC	stage 1 versus stage 3 log2FC	COG class	COG class_annotation	GO annotation	KEGG annotation	KEGG pathway annotation	KOG class	KOG class annotation	Pfam annotation	Swiss Prot annotation	eggNOG class	eggNOG class annotation	NR annotation
POPTR_017G035100	4CL6	0.27	3.95	5.04	3.54	up	0.25	normal	3.88	up	[IQ]	Lipid transport and metabolism;; Secondary metabolites biosynthesis, transport and catabolism	Molecular Function: catalytic activity (GO:0003824);;	K01904|8.5e-57|ccaj:109788437|K01904 4-coumarate--CoA ligase [EC:6.2.1.12] | (RefSeq) 4-coumarate--CoA ligase-like 9	Ubiquinone and other terpenoid-quinone biosynthesis (ko00130);; Phenylpropanoid biosynthesis (ko00940)	[I]	Lipid transport and metabolism	AMP-binding enzyme C-terminal domain	4-coumarate--CoA ligase-like 6 OS=Oryza sativa subsp. japonica OX=39947 GN=4CLL6 PE=2 SV=2	I	Lipid transport and metabolism	hypothetical protein POPTR_017G035100 [Populus trichocarpa]
POPTR_017G034901	4CL6	0.24	2.27	3.22	3.23	up	0.47	normal	3.79	up	[IQ]	Lipid transport and metabolism;; Secondary metabolites biosynthesis, transport and catabolism	Molecular Function: catalytic activity (GO:0003824);;	K01904|8.5e-60|ccaj:109788437|K01904 4-coumarate--CoA ligase [EC:6.2.1.12] | (RefSeq) 4-coumarate--CoA ligase-like 9	Ubiquinone and other terpenoid-quinone biosynthesis (ko00130);; Phenylpropanoid biosynthesis (ko00940)	[I]	Lipid transport and metabolism	AMP-binding enzyme C-terminal domain	4-coumarate--CoA ligase-like 6 OS=Oryza sativa subsp. japonica OX=39947 GN=4CLL6 PE=2 SV=2	I	Lipid transport and metabolism	hypothetical protein POPTR_017G034901 [Populus trichocarpa]
POPTR_017G033600	4CL9	1.98	17.65	22	3.19	up	0.32	normal	3.56	up	[IQ]	Lipid transport and metabolism;; Secondary metabolites biosynthesis, transport and catabolism	Cellular Component: peroxisome (GO:0005777);; Biological Process: jasmonic acid biosynthetic process (GO:0009695);; Molecular Function: CoA-ligase activity (GO:0016405);;	K01904|3.6e-180|vvi:100268159|K01904 4-coumarate--CoA ligase [EC:6.2.1.12] | (RefSeq) 4-coumarate--CoA ligase-like 9	Ubiquinone and other terpenoid-quinone biosynthesis (ko00130);; Phenylpropanoid biosynthesis (ko00940)	[I]	Lipid transport and metabolism	AMP-binding enzyme	4-coumarate--CoA ligase-like 9 OS=Arabidopsis thaliana OX=3702 GN=4CLL9 PE=1 SV=2	I	Lipid transport and metabolism	4-coumarate--CoA ligase-like 9 [Populus trichocarpa]
POPTR_003G188500	4CL1	2.3	3.27	4.53	2.3	up	3.27	up	4.53	up	[IQ]	Lipid transport and metabolism;; Secondary metabolites biosynthesis, transport and catabolism	Molecular Function: CoA-ligase activity (GO:0016405);;	K01904|2.5e-312|pop:7462820|K01904 4-coumarate--CoA ligase [EC:6.2.1.12] | (RefSeq) 4-coumarate--CoA ligase 1	Ubiquinone and other terpenoid-quinone biosynthesis (ko00130);; Phenylpropanoid biosynthesis (ko00940)	[I]	Lipid transport and metabolism	AMP-binding enzyme	4-coumarate--CoA ligase 1 OS=Nicotiana tabacum OX=4097 GN=4CL1 PE=2 SV=1	I	Lipid transport and metabolism	4-coumarate--CoA ligase 1 [Populus trichocarpa]
POPTR_006G169700	4CL2	0.37	1.66	2.02	2.18	up	0.24	normal	2.49	up	[IQ]	Lipid transport and metabolism;; Secondary metabolites biosynthesis, transport and catabolism	Molecular Function: CoA-ligase activity (GO:0016405);;	K01904|0.0e+00|pop:18100511|K01904 4-coumarate--CoA ligase [EC:6.2.1.12] | (RefSeq) 4-coumarate--CoA ligase 2	Ubiquinone and other terpenoid-quinone biosynthesis (ko00130);; Phenylpropanoid biosynthesis (ko00940)	[I]	Lipid transport and metabolism	AMP-binding enzyme	4-coumarate--CoA ligase 2 OS=Nicotiana tabacum OX=4097 GN=4CL2 PE=1 SV=1	I	Lipid transport and metabolism	4-coumarate--CoA ligase 2 [Populus trichocarpa]
POPTR_006G169600	4CL2	0.27	1.06	1.55	1.94	up	0.44	normal	2.5	up	[IQ]	Lipid transport and metabolism;; Secondary metabolites biosynthesis, transport and catabolism	Molecular Function: CoA-ligase activity (GO:0016405);;	K01904|1.5e-311|pop:18100510|K01904 4-coumarate--CoA ligase [EC:6.2.1.12] | (RefSeq) 4-coumarate--CoA ligase 2	Ubiquinone and other terpenoid-quinone biosynthesis (ko00130);; Phenylpropanoid biosynthesis (ko00940)	[I]	Lipid transport and metabolism	AMP-binding enzyme	4-coumarate--CoA ligase 2 OS=Nicotiana tabacum OX=4097 GN=4CL2 PE=1 SV=1	I	Lipid transport and metabolism	4-coumarate--CoA ligase 2 [Populus trichocarpa]
POPTR_012G094900	4CL9	7.46	16.39	18.23	1.19	up	0.16	normal	1.39	up	[IQ]	Lipid transport and metabolism;; Secondary metabolites biosynthesis, transport and catabolism	Molecular Function: CoA-ligase activity (GO:0016405);;	K01904|3.3e-218|pop:7454535|K01904 4-coumarate--CoA ligase [EC:6.2.1.12] | (RefSeq) 4-coumarate--CoA ligase-like 9	Ubiquinone and other terpenoid-quinone biosynthesis (ko00130);; Phenylpropanoid biosynthesis (ko00940)	[I]	Lipid transport and metabolism	AMP-binding enzyme	4-coumarate--CoA ligase-like 9 OS=Arabidopsis thaliana OX=3702 GN=4CLL9 PE=1 SV=2	I	Lipid transport and metabolism	4-coumarate--CoA ligase-like 9 [Populus trichocarpa]
POPTR_015G092300	4CL9	0.56	3.07	2.68	2.45	up	-0.16	normal	2.3	up	[IQ]	Lipid transport and metabolism;; Secondary metabolites biosynthesis, transport and catabolism	Molecular Function: CoA-ligase activity (GO:0016405);;	K01904|1.2e-276|pop:7454535|K01904 4-coumarate--CoA ligase [EC:6.2.1.12] | (RefSeq) 4-coumarate--CoA ligase-like 9	Ubiquinone and other terpenoid-quinone biosynthesis (ko00130);; Phenylpropanoid biosynthesis (ko00940)	[I]	Lipid transport and metabolism	AMP-binding enzyme	4-coumarate--CoA ligase-like 9 OS=Arabidopsis thaliana OX=3702 GN=4CLL9 PE=1 SV=2	I	Lipid transport and metabolism	4-coumarate--CoA ligase-like 9 [Populus trichocarpa]
POPTR_001G036900	4CL1	10.75	36.31	35.43	1.81	up	-0.01	normal	1.81	up	[IQ]	Lipid transport and metabolism;; Secondary metabolites biosynthesis, transport and catabolism	Molecular Function: CoA-ligase activity (GO:0016405);;	K01904|1.9e-311|pop:7455782|K01904 4-coumarate--CoA ligase [EC:6.2.1.12] | (RefSeq) 4-coumarate--CoA ligase 1	Ubiquinone and other terpenoid-quinone biosynthesis (ko00130);; Phenylpropanoid biosynthesis (ko00940)	[I]	Lipid transport and metabolism	AMP-binding enzyme	4-coumarate--CoA ligase 1 OS=Nicotiana tabacum OX=4097 GN=4CL1 PE=2 SV=1	I	Lipid transport and metabolism	4-coumarate--CoA ligase 1 [Populus trichocarpa]
POPTR_012G095000	4CL9	15.89	35.22	33.76	1.2	up	-0.04	normal	1.19	up	[IQ]	Lipid transport and metabolism;; Secondary metabolites biosynthesis, transport and catabolism	Molecular Function: CoA-ligase activity (GO:0016405);;	K01904|1.1e-226|pop:7454535|K01904 4-coumarate--CoA ligase [EC:6.2.1.12] | (RefSeq) 4-coumarate--CoA ligase-like 9	Ubiquinone and other terpenoid-quinone biosynthesis (ko00130);; Phenylpropanoid biosynthesis (ko00940)	[I]	Lipid transport and metabolism	AMP-binding enzyme	4-coumarate--CoA ligase-like 9 OS=Arabidopsis thaliana OX=3702 GN=4CLL9 PE=1 SV=2	I	Lipid transport and metabolism	4-coumarate--CoA ligase-like 9 [Populus trichocarpa]
POPTR_012G094800	4CL9	26.17	10.16	11.69	-1.31	down	0.21	normal	-1.05	down	[IQ]	Lipid transport and metabolism;; Secondary metabolites biosynthesis, transport and catabolism	Molecular Function: CoA-ligase activity (GO:0016405);;	K01904|0.0e+00|pop:7454535|K01904 4-coumarate--CoA ligase [EC:6.2.1.12] | (RefSeq) 4-coumarate--CoA ligase-like 9	Ubiquinone and other terpenoid-quinone biosynthesis (ko00130);; Phenylpropanoid biosynthesis (ko00940)	[I]	Lipid transport and metabolism	AMP-binding enzyme	4-coumarate--CoA ligase-like 9 OS=Arabidopsis thaliana OX=3702 GN=4CLL9 PE=1 SV=2	I	Lipid transport and metabolism	4-coumarate--CoA ligase-like 9 [Populus trichocarpa]
POPTR_019G112000	CCR1	21.49	49.79	53.86	1.26	up	0.12	normal	1.42	up	--	--	Molecular Function: transcriptional activator activity, RNA polymerase II transcription regulatory region sequence-specific binding (GO:0001228);; Cellular Component: nucleus (GO:0005634);; Molecular Function: protein dimerization activity (GO:0046983);;	K05765|5.5e-16|gra:105781290|K05765 cofilin | (RefSeq) uncharacterized LOC105781290	--	--	--	--	Transcription factor bHLH153 OS=Arabidopsis thaliana OX=3702 GN=BHLH153 PE=1 SV=1	K	Transcription	transcription factor bHLH153 [Populus trichocarpa]
POPTR_008G070800	CCR1	6.65	8.39	17.81	0.39	normal	0.98	normal	1.5	up	--	--	Molecular Function: protein dimerization activity (GO:0046983);;	K22484|4.4e-24|pvu:PHAVU_001G121200g|K22484 transcriptional regulator CBF1 | (RefSeq) hypothetical protein	--	--	--	Helix-loop-helix DNA-binding domain	Transcription factor bHLH51 OS=Arabidopsis thaliana OX=3702 GN=BHLH51 PE=2 SV=1	K	Transcription	transcription factor bHLH51 isoform X1 [Populus trichocarpa]
POPTR_010G098932	CCR2	2.34	0.75	0.44	-1.55	down	-0.47	normal	-2.21	down	--	--	Molecular Function: protein dimerization activity (GO:0046983);;	K05765|1.3e-15|gra:105781290|K05765 cofilin | (RefSeq) uncharacterized LOC105781290	--	--	--	--	Transcription factor bHLH111 OS=Arabidopsis thaliana OX=3702 GN=BHLH111 PE=2 SV=1	K	Transcription	hypothetical protein POPTR_010G098932 [Populus trichocarpa]
POPTR_018G141700	CCR1	8.75	5.03	2.68	-0.74	normal	-0.83	normal	-1.59	down	--	--	Molecular Function: protein dimerization activity (GO:0046983);;	K13422|1.0e-10|ppp:112288376|K13422 transcription factor MYC2 | (RefSeq) transcription factor MYC3-like isoform X1	MAPK signaling pathway - plant (ko04016);; Plant hormone signal transduction (ko04075)	--	--	Helix-loop-helix DNA-binding domain	Transcription factor bHLH35 OS=Arabidopsis thaliana OX=3702 GN=BHLH35 PE=2 SV=1	K	Transcription	transcription factor bHLH35 [Populus trichocarpa]
POPTR_009G063400	CAD	8.6	13.65	25.2	1.65	up	0.72	normal	0.87	normal	[G]	Carbohydrate transport and metabolism	Molecular Function: zinc ion binding (GO:0008270);; Biological Process: lignin biosynthetic process (GO:0009809);; Molecular Function: oxidoreductase activity, acting on the CH-OH group of donors, NAD or NADP as acceptor (GO:0016616);; Molecular Function: cinnamyl-alcohol dehydrogenase activity (GO:0045551);;	K23232|4.2e-156|nau:109215604|K23232 8-hydroxygeraniol dehydrogenase [EC:1.1.1.324] | (RefSeq) 8-hydroxygeraniol dehydrogenase-like	Monoterpenoid biosynthesis (ko00902)	[Q]	Secondary metabolites biosynthesis, transport and catabolism	Alcohol dehydrogenase GroES-like domain	Probable mannitol dehydrogenase OS=Fragaria ananassa OX=3747 GN=CAD PE=2 SV=1	Q	Secondary metabolites biosynthesis, transport and catabolism	probable mannitol dehydrogenase isoform X1 [Populus trichocarpa]
POPTR_001G307200	CAD9	43.93	15.35	12.37	-1.46	down	-0.27	normal	-1.72	down	[G]	Carbohydrate transport and metabolism	Molecular Function: zinc ion binding (GO:0008270);; Molecular Function: oxidoreductase activity, acting on the CH-OH group of donors, NAD or NADP as acceptor (GO:0016616);;	K00083|1.3e-210|pop:7465014|K00083 cinnamyl-alcohol dehydrogenase [EC:1.1.1.195] | (RefSeq) probable cinnamyl alcohol dehydrogenase 9	Phenylpropanoid biosynthesis (ko00940)	[Q]	Secondary metabolites biosynthesis, transport and catabolism	Alcohol dehydrogenase GroES-like domain	Probable cinnamyl alcohol dehydrogenase 9 OS=Arabidopsis thaliana OX=3702 GN=CAD9 PE=2 SV=2	Q	Secondary metabolites biosynthesis, transport and catabolism	probable cinnamyl alcohol dehydrogenase 9 [Populus trichocarpa]
POPTR_006G199100	CAD	17.64	6.37	6.71	-1.41	down	0.08	normal	-1.25	down	[G]	Carbohydrate transport and metabolism	Molecular Function: zinc ion binding (GO:0008270);; Biological Process: lignin biosynthetic process (GO:0009809);; Molecular Function: oxidoreductase activity, acting on the CH-OH group of donors, NAD or NADP as acceptor (GO:0016616);; Molecular Function: cinnamyl-alcohol dehydrogenase activity (GO:0045551);;	K23232|4.7e-165|oeu:111373464|K23232 8-hydroxygeraniol dehydrogenase [EC:1.1.1.324] | (RefSeq) 8-hydroxygeraniol dehydrogenase-like	Monoterpenoid biosynthesis (ko00902)	[Q]	Secondary metabolites biosynthesis, transport and catabolism	Alcohol dehydrogenase GroES-like domain	Probable mannitol dehydrogenase OS=Fragaria ananassa OX=3747 GN=CAD PE=2 SV=1	Q	Secondary metabolites biosynthesis, transport and catabolism	probable mannitol dehydrogenase [Populus trichocarpa]
POPTR_009G099800	CCOAOMT1	40.86	111.28	126.59	1.5	up	0.19	normal	1.73	up	[R]	General function prediction only	Molecular Function: O-methyltransferase activity (GO:0008171);; Biological Process: methylation (GO:0032259);;	K00588|1.9e-141|pop:7457542|K00588 caffeoyl-CoA O-methyltransferase [EC:2.1.1.104] | (RefSeq) caffeoyl-CoA O-methyltransferase 1	Phenylpropanoid biosynthesis (ko00940);; Flavonoid biosynthesis (ko00941);; Stilbenoid, diarylheptanoid and gingerol biosynthesis (ko00945)	[Q]	Secondary metabolites biosynthesis, transport and catabolism	O-methyltransferase	Caffeoyl-CoA O-methyltransferase 1 OS=Populus trichocarpa OX=3694 GN=CCOAOMT1 PE=2 SV=1	Q	Secondary metabolites biosynthesis, transport and catabolism	caffeoyl-CoA O-methyltransferase 1 [Populus trichocarpa]
POPTR_001G304800	CCOAOMT2	41.13	86.73	96.21	1.13	up	0.15	normal	1.32	up	[R]	General function prediction only	Molecular Function: O-methyltransferase activity (GO:0008171);; Molecular Function: S-adenosylmethionine-dependent methyltransferase activity (GO:0008757);; Biological Process: methylation (GO:0032259);;	K00588|7.2e-141|pop:7492044|K00588 caffeoyl-CoA O-methyltransferase [EC:2.1.1.104] | (RefSeq) caffeoyl-CoA O-methyltransferase 2	Phenylpropanoid biosynthesis (ko00940);; Flavonoid biosynthesis (ko00941);; Stilbenoid, diarylheptanoid and gingerol biosynthesis (ko00945)	[Q]	Secondary metabolites biosynthesis, transport and catabolism	O-methyltransferase	Caffeoyl-CoA O-methyltransferase 2 OS=Populus trichocarpa OX=3694 GN=CCOAOMT2 PE=2 SV=1	Q	Secondary metabolites biosynthesis, transport and catabolism	caffeoyl-CoA O-methyltransferase 2 [Populus trichocarpa]
POPTR_002G180600	COMT1	1.55	3.55	7.06	1.23	up	0.84	normal	2.23	up	[H]	Coenzyme transport and metabolism	Molecular Function: O-methyltransferase activity (GO:0008171);; Molecular Function: S-adenosylmethionine-dependent methyltransferase activity (GO:0008757);; Biological Process: aromatic compound biosynthetic process (GO:0019438);; Biological Process: methylation (GO:0032259);; Molecular Function: protein dimerization activity (GO:0046983);;	K13066|9.0e-209|pop:18096397|K13066 caffeic acid 3-O-methyltransferase [EC:2.1.1.68] | (RefSeq) caffeic acid 3-O-methyltransferase	Phenylpropanoid biosynthesis (ko00940)	[R]	General function prediction only	O-methyltransferase domain	Caffeic acid 3-O-methyltransferase OS=Prunus dulcis OX=3755 GN=COMT1 PE=2 SV=1	--	--	caffeic acid 3-O-methyltransferase [Populus trichocarpa]
POPTR_002G180500	COMT1	0.31	0.32	1.11	--	--	1.02	up	1.77	up	[H]	Coenzyme transport and metabolism	Molecular Function: O-methyltransferase activity (GO:0008171);; Molecular Function: S-adenosylmethionine-dependent methyltransferase activity (GO:0008757);; Biological Process: aromatic compound biosynthetic process (GO:0019438);; Biological Process: methylation (GO:0032259);; Molecular Function: protein dimerization activity (GO:0046983);;	K13066|9.0e-209|pop:18096396|K13066 caffeic acid 3-O-methyltransferase [EC:2.1.1.68] | (RefSeq) caffeic acid 3-O-methyltransferase	Phenylpropanoid biosynthesis (ko00940)	[R]	General function prediction only	O-methyltransferase domain	Caffeic acid 3-O-methyltransferase OS=Prunus dulcis OX=3755 GN=COMT1 PE=2 SV=1	--	--	caffeic acid 3-O-methyltransferase [Populus trichocarpa]
POPTR_002G180700	COMT1	0.21	0.44	1.01	--	--	0.74	normal	2.2	up	[H]	Coenzyme transport and metabolism	Molecular Function: O-methyltransferase activity (GO:0008171);; Molecular Function: S-adenosylmethionine-dependent methyltransferase activity (GO:0008757);; Biological Process: aromatic compound biosynthetic process (GO:0019438);; Biological Process: methylation (GO:0032259);; Molecular Function: protein dimerization activity (GO:0046983);;	K13066|4.1e-195|pop:7487746|K13066 caffeic acid 3-O-methyltransferase [EC:2.1.1.68] | (RefSeq) caffeic acid 3-O-methyltransferase	Phenylpropanoid biosynthesis (ko00940)	[R]	General function prediction only	O-methyltransferase domain	Caffeic acid 3-O-methyltransferase OS=Prunus dulcis OX=3755 GN=COMT1 PE=2 SV=1	--	--	caffeic acid 3-O-methyltransferase, partial [Populus trichocarpa]
POPTR_014G129000	CSE	21.76	83.05	97.02	1.98	up	0.23	normal	2.26	up	[I]	Lipid transport and metabolism	Cellular Component: membrane (GO:0016020);; Molecular Function: lipase activity (GO:0016298);;	K18368|1.9e-203|pop:18105288|K18368 caffeoylshikimate esterase [EC:3.1.1.-] | (RefSeq) caffeoylshikimate esterase	Phenylpropanoid biosynthesis (ko00940)	[I]	Lipid transport and metabolism	Serine aminopeptidase, S33	Caffeoylshikimate esterase OS=Arabidopsis thaliana OX=3702 GN=CSE PE=1 SV=1	I	Lipid transport and metabolism	caffeoylshikimate esterase [Populus trichocarpa]
POPTR_003G059200	CSE	5.78	10.56	12.93	0.92	normal	0.28	normal	1.26	up	[I]	Lipid transport and metabolism	Cellular Component: membrane (GO:0016020);; Molecular Function: lipase activity (GO:0016298);;	K18368|1.1e-192|pop:7475727|K18368 caffeoylshikimate esterase [EC:3.1.1.-] | (RefSeq) caffeoylshikimate esterase	Phenylpropanoid biosynthesis (ko00940)	[I]	Lipid transport and metabolism	Serine aminopeptidase, S33	Caffeoylshikimate esterase OS=Arabidopsis thaliana OX=3702 GN=CSE PE=1 SV=1	I	Lipid transport and metabolism	caffeoylshikimate esterase [Populus trichocarpa]
POPTR_001G175000	CSE	9.28	14	17.45	0.64	normal	0.32	normal	1.01	up	[I]	Lipid transport and metabolism	Cellular Component: membrane (GO:0016020);; Molecular Function: lipase activity (GO:0016298);;	K18368|2.4e-192|pop:7486620|K18368 caffeoylshikimate esterase [EC:3.1.1.-] | (RefSeq) caffeoylshikimate esterase	Phenylpropanoid biosynthesis (ko00940)	[I]	Lipid transport and metabolism	Serine aminopeptidase, S33	Caffeoylshikimate esterase OS=Arabidopsis thaliana OX=3702 GN=CSE PE=1 SV=1	I	Lipid transport and metabolism	caffeoylshikimate esterase [Populus trichocarpa]
POPTR_003G214700	POD	2.68	7.34	6.92	1.5	up	-0.06	normal	1.45	up	[I]	Lipid transport and metabolism	Cellular Component: membrane (GO:0016020);; Molecular Function: lipase activity (GO:0016298);;	K18368|2.4e-192|pop:7486620|K18368 caffeoylshikimate esterase [EC:3.1.1.-] | (RefSeq) caffeoylshikimate esterase	Phenylpropanoid biosynthesis (ko00940)	[I]	Lipid transport and metabolism	Serine aminopeptidase, S33	Caffeoylshikimate esterase OS=Arabidopsis thaliana OX=3702 GN=CSE PE=1 SV=1	I	Lipid transport and metabolism	caffeoylshikimate esterase [Populus trichocarpa]
POPTR_003G214800	POD	32.55	9.75	4.63	-1.68	down	-0.96	normal	-2.69	down	--	--	Molecular Function: peroxidase activity (GO:0004601);; Cellular Component: extracellular region (GO:0005576);; Biological Process: response to oxidative stress (GO:0006979);; Molecular Function: heme binding (GO:0020037);; Biological Process: hydrogen peroxide catabolic process (GO:0042744);; Molecular Function: metal ion binding (GO:0046872);;	K00430|8.5e-196|pop:7463603|K00430 peroxidase [EC:1.11.1.7] | (RefSeq) peroxidase A2	Phenylpropanoid biosynthesis (ko00940)	--	--	Peroxidase	Peroxidase 15 OS=Ipomoea batatas OX=4120 GN=pod PE=1 SV=1	Q	Secondary metabolites biosynthesis, transport and catabolism	peroxidase A2 [Populus trichocarpa]
POPTR_010G224200	PALG2B	0.8	4.85	5.55	2.62	up	0.19	normal	2.85	up	[E]	Amino acid transport and metabolism	Cellular Component: cytoplasm (GO:0005737);; Biological Process: L-phenylalanine catabolic process (GO:0006559);; Biological Process: cinnamic acid biosynthetic process (GO:0009800);; Molecular Function: ammonia-lyase activity (GO:0016841);; Molecular Function: phenylalanine ammonia-lyase activity (GO:0045548);;	K10775|0.0e+00|pop:7463442|K10775 phenylalanine ammonia-lyase [EC:4.3.1.24] | (RefSeq) phenylalanine ammonia-lyase G2B	Phenylalanine metabolism (ko00360);; Phenylpropanoid biosynthesis (ko00940)	[Q]	Secondary metabolites biosynthesis, transport and catabolism	Aromatic amino acid lyase	Phenylalanine ammonia-lyase G2B OS=Populus kitakamiensis OX=34292 GN=PALG2B PE=3 SV=1	Q	Secondary metabolites biosynthesis, transport and catabolism	phenylalanine ammonia-lyase G2B [Populus trichocarpa]
POPTR_010G224100	PALG2B	2.04	12.26	13.07	2.62	up	0.1	normal	2.75	up	[E]	Amino acid transport and metabolism	Cellular Component: cytoplasm (GO:0005737);; Biological Process: L-phenylalanine catabolic process (GO:0006559);; Biological Process: cinnamic acid biosynthetic process (GO:0009800);; Molecular Function: ammonia-lyase activity (GO:0016841);; Molecular Function: phenylalanine ammonia-lyase activity (GO:0045548);;	K10775|0.0e+00|pop:7463441|K10775 phenylalanine ammonia-lyase [EC:4.3.1.24] | (RefSeq) phenylalanine ammonia-lyase G2B	Phenylalanine metabolism (ko00360);; Phenylpropanoid biosynthesis (ko00940)	[Q]	Secondary metabolites biosynthesis, transport and catabolism	Aromatic amino acid lyase	Phenylalanine ammonia-lyase G2B OS=Populus kitakamiensis OX=34292 GN=PALG2B PE=3 SV=1	Q	Secondary metabolites biosynthesis, transport and catabolism	phenylalanine ammonia-lyase G2B [Populus trichocarpa]
POPTR_008G038200	PALG2B	11.16	52.73	58.95	2.29	up	0.17	normal	2.49	up	[E]	Amino acid transport and metabolism	Cellular Component: cytoplasm (GO:0005737);; Biological Process: L-phenylalanine catabolic process (GO:0006559);; Biological Process: cinnamic acid biosynthetic process (GO:0009800);; Molecular Function: ammonia-lyase activity (GO:0016841);; Molecular Function: phenylalanine ammonia-lyase activity (GO:0045548);;	K10775|0.0e+00|pop:7479878|K10775 phenylalanine ammonia-lyase [EC:4.3.1.24] | (RefSeq) phenylalanine ammonia-lyase G4	Phenylalanine metabolism (ko00360);; Phenylpropanoid biosynthesis (ko00940)	[Q]	Secondary metabolites biosynthesis, transport and catabolism	Aromatic amino acid lyase	Phenylalanine ammonia-lyase G2B OS=Populus kitakamiensis OX=34292 GN=PALG2B PE=3 SV=1	Q	Secondary metabolites biosynthesis, transport and catabolism	phenylalanine ammonia-lyase G4 [Populus trichocarpa]
