# Supplementary material for: Transcriptome and miRNAs Profiles Reveal Regulatory Network and Key Regulators of Secondary Xylem Formation in “84K” Poplar
Source: Int J Mol Sci. 2023 Nov 17;24(22):16438. doi: 10.3390/ijms242216438 (PMC10671414; doi:10.3390/ijms242216438)
Supplement: Supplementary file 1 [file ijms-24-16438-s001.zip › Supplementary Table S6.xlsx]

## Sheet: All_miRNA.count
Supplementary Table S6. Detailed information of known and novel miRNAs during secondary growth of "84K" poplar stems
(a) 293 Known miRNAs
miRNA	stage 1-1 count	stage 1-2 count	stage 1-2 count	stage 2-1 count	stage 2-2 count	stage 2-3 count	stage 3-1 count	stage 3-2 count	stage 3-3 count	gene length
ptc-miR1444a	389	620	854	449	351	427	506	410	162	20
ptc-miR1444b	2462	3401	4576	2618	2179	2464	2933	2372	1094	20
ptc-miR1444c	2462	3401	4576	2618	2179	2464	2933	2372	1094	20
ptc-miR1444d	0	0	0	0	0	0	0	1	0	21
ptc-miR1444e	0	0	0	0	0	0	0	1	0	21
ptc-miR1446a	367	397	343	177	188	216	242	329	122	20
ptc-miR1446b	52	59	77	35	36	33	35	47	27	20
ptc-miR1446c	32	50	45	18	25	24	25	34	23	20
ptc-miR1446d	32	50	45	18	25	25	26	34	25	20
ptc-miR1446e	32	50	45	18	25	24	25	34	23	20
ptc-miR1447	2504	3883	4111	1808	1634	1616	2242	1330	760	21
ptc-miR1448	24290	30901	32493	21904	21604	21326	18125	18809	11032	20
ptc-miR1450	4087	4645	5482	6477	6310	5187	4907	4801	2181	22
ptc-miR156a	19	29	35	16	11	22	34	29	14	20
ptc-miR156b	19	29	35	15	10	22	33	28	14	20
ptc-miR156c	19	29	35	16	11	22	34	29	14	20
ptc-miR156d	34	40	46	38	19	32	57	36	26	20
ptc-miR156e	19	29	35	16	11	22	34	29	14	20
ptc-miR156f	19	29	35	16	11	22	34	29	14	20
ptc-miR156g	88	109	150	93	60	127	149	121	55	21
ptc-miR156h	256	271	328	182	129	245	230	173	82	21
ptc-miR156i	88	109	150	93	60	127	149	121	55	21
ptc-miR156j	88	109	150	93	60	127	149	121	55	21
ptc-miR156k	1	0	0	0	0	0	0	0	0	20
ptc-miR156l	0	0	1	0	0	0	0	0	1	21
ptc-miR159a	37424	40619	48039	42575	40348	35612	40106	37604	18961	21
ptc-miR159b	37423	40619	48039	42573	40348	35612	40106	37604	18961	21
ptc-miR159d	2094	2696	3707	1862	1667	1919	2247	1536	843	21
ptc-miR160a	143	192	242	126	122	132	157	307	108	21
ptc-miR160b-3p	37	70	55	12	4	16	9	12	6	21
ptc-miR160b-5p	218	275	344	148	142	153	202	347	134	21
ptc-miR160c-3p	37	70	55	12	4	16	9	12	6	21
ptc-miR160c-5p	218	275	344	148	142	153	202	347	134	21
ptc-miR160d	143	192	242	124	122	126	156	306	109	21
ptc-miR160e-3p	178	215	201	103	58	178	177	480	169	21
ptc-miR160e-5p	181	210	229	190	147	288	286	630	286	21
ptc-miR160f	191	223	241	200	155	301	302	645	301	21
ptc-miR160g	11	11	8	9	4	0	5	7	5	21
ptc-miR160h	278	354	318	91	46	191	171	381	198	21
ptc-miR162a	791	1153	1370	1103	926	923	1144	720	536	21
ptc-miR162b	834	1223	1377	1148	979	920	1157	674	569	21
ptc-miR164a	339	462	432	559	541	593	665	1408	496	21
ptc-miR164b	350	474	435	564	542	601	670	1412	497	21
ptc-miR164c	342	465	432	559	544	593	665	1406	496	21
ptc-miR164d	339	462	432	559	541	593	665	1408	496	21
ptc-miR164e	385	517	534	683	664	720	752	1509	573	21
ptc-miR164f	1	0	0	0	2	1	0	2	1	21
ptc-miR166a	8143	9686	11135	6932	6897	7906	6352	11176	4750	21
ptc-miR166b	8633	10251	11739	7259	7224	8291	6634	11687	4960	21
ptc-miR166c	8141	9685	11134	6933	6894	7906	6353	11175	4751	21
ptc-miR166d	8733	10357	11874	7335	7277	8376	6721	11752	5007	21
ptc-miR166e	8633	10251	11739	7259	7224	8291	6634	11687	4960	21
ptc-miR166f	8733	10357	11874	7335	7277	8376	6721	11752	5007	21
ptc-miR166g	9645	11461	12968	8605	8595	9694	7749	13219	5637	21
ptc-miR166h	9645	11461	12968	8605	8595	9694	7749	13219	5637	21
ptc-miR166i	8249	9802	11281	7025	6975	8010	6453	11283	4807	21
ptc-miR166j	8143	9686	11135	6932	6897	7906	6352	11176	4750	21
ptc-miR166k	8143	9686	11135	6932	6897	7906	6352	11176	4750	21
ptc-miR166l	8249	9802	11281	7025	6975	8010	6453	11283	4807	21
ptc-miR166m	9741	11559	13097	8681	8659	9782	7841	13299	5686	21
ptc-miR166n	6944	7243	7706	4044	4164	3921	2550	3666	1547	21
ptc-miR166o	6944	7243	7706	4044	4164	3921	2550	3666	1547	21
ptc-miR166p	7	6	4	4	5	0	1	8	1	21
ptc-miR166q	6971	7283	7762	4061	4175	3927	2563	3676	1551	21
ptc-miR167a	163	197	234	112	112	93	60	93	46	21
ptc-miR167b	107	135	151	89	87	71	54	79	36	21
ptc-miR167c	157	193	228	110	109	90	57	92	46	21
ptc-miR167d	107	135	150	89	87	71	54	79	36	21
ptc-miR167e	2406	3576	3484	399	377	389	334	417	233	21
ptc-miR167f-3p	13	18	41	2	1	1	1	2	3	21
ptc-miR167f-5p	183	219	219	25	27	26	18	29	16	21
ptc-miR167g-3p	13	18	41	2	1	1	1	2	3	21
ptc-miR167g-5p	80	91	112	17	19	22	16	20	13	21
ptc-miR167h-3p	13	18	41	2	1	1	1	2	2	21
ptc-miR167h-5p	101	130	107	7	7	3	2	9	3	21
ptc-miR168a-3p	2393	2563	2525	1269	882	1420	1021	1836	952	21
ptc-miR168a-5p	2427	2842	2456	1756	1360	2441	1284	5279	1707	21
ptc-miR168b-3p	2393	2563	2525	1269	882	1420	1021	1836	952	21
ptc-miR168b-5p	2427	2842	2456	1756	1360	2441	1284	5279	1707	21
ptc-miR169a	2	2	3	1	3	0	0	2	0	21
ptc-miR169aa	35	31	32	50	48	38	235	84	48	21
ptc-miR169ac	948	1093	1124	314	292	386	386	674	266	21
ptc-miR169ad	948	1092	1125	314	292	386	386	674	266	21
ptc-miR169ae	2088	2317	2565	938	917	1029	1423	2344	976	21
ptc-miR169af	2088	2317	2565	938	917	1029	1423	2344	976	21
ptc-miR169b-3p	7	6	5	4	3	2	0	7	0	20
ptc-miR169b-5p	2	2	3	0	1	0	0	2	0	21
ptc-miR169c	2	2	3	0	1	0	0	2	0	21
ptc-miR169h	2	2	3	3	2	0	2	2	0	21
ptc-miR169i	21	29	100	45	29	21	20	19	10	21
ptc-miR169j	21	29	100	45	29	21	21	19	10	21
ptc-miR169k	21	28	99	45	31	21	20	19	8	21
ptc-miR169l	21	29	100	45	29	21	21	19	10	21
ptc-miR169m	21	29	100	45	29	21	20	19	10	21
ptc-miR169n-3p	20	34	38	35	16	40	19	49	16	20
ptc-miR169n-5p	13	7	9	4	1	4	1	11	0	21
ptc-miR169q	198	240	362	283	195	191	230	255	143	21
ptc-miR169r	1	0	0	0	0	0	0	0	0	21
ptc-miR169s	2	2	2	1	1	0	2	2	0	21
ptc-miR169t	8	6	12	10	3	3	14	7	13	21
ptc-miR169u-5p	678	765	914	502	457	453	714	556	299	21
ptc-miR169v	13	24	30	21	14	21	22	42	17	21
ptc-miR169w	13	24	30	21	14	21	22	42	17	21
ptc-miR169z	0	1	0	0	0	0	0	3	0	21
ptc-miR171a-3p	19	17	30	3	4	4	2	1	0	21
ptc-miR171a-5p	14	38	22	8	6	16	10	3	4	21
ptc-miR171b	19	17	30	3	4	4	2	1	0	21
ptc-miR171c	73	60	96	218	185	203	221	402	156	21
ptc-miR171d	73	60	96	218	185	203	221	402	156	21
ptc-miR171e	45	69	107	20	18	16	5	12	2	21
ptc-miR171f	50	72	118	23	19	18	5	12	2	21
ptc-miR171g-3p	47	72	110	20	20	16	5	12	3	21
ptc-miR171g-5p	0	0	4	0	0	1	2	6	2	21
ptc-miR171h-3p	47	72	110	20	20	16	5	12	3	21
ptc-miR171i	43	65	105	21	17	18	4	12	2	21
ptc-miR171j	0	0	0	0	0	1	0	1	0	20
ptc-miR171k	0	0	0	0	0	1	1	0	0	21
ptc-miR171l-3p	0	0	0	0	0	1	0	1	0	20
ptc-miR171l-5p	4	1	1	1	5	1	4	6	2	22
ptc-miR171m	0	0	0	0	0	1	0	1	0	20
ptc-miR172a	5	7	6	3	2	2	0	0	0	21
ptc-miR172b-3p	5	7	6	3	2	2	0	0	0	21
ptc-miR172b-5p	0	1	1	0	0	0	0	0	0	21
ptc-miR172c	5	7	6	3	2	2	0	0	0	21
ptc-miR172d	0	0	0	0	0	1	0	1	0	21
ptc-miR172e	0	0	0	0	0	1	0	1	0	21
ptc-miR172f	5	7	6	3	2	2	0	0	0	21
ptc-miR172g-3p	12	10	28	29	27	16	8	12	2	21
ptc-miR172h-3p	12	10	28	29	27	16	8	12	2	21
ptc-miR172h-5p	15	17	28	21	25	21	17	17	7	21
ptc-miR2111a	30	26	44	65	57	52	7	35	7	21
ptc-miR2111b	30	26	44	65	57	52	7	35	7	21
ptc-miR319a	2666	3631	4451	5250	5191	5462	5356	5472	2568	20
ptc-miR319b	2379	3257	4036	4751	4714	4872	4550	4919	2253	20
ptc-miR319c	2605	3550	4381	5149	5115	5333	5100	5315	2444	20
ptc-miR319d	2605	3550	4381	5149	5115	5333	5100	5315	2444	20
ptc-miR319e	43	50	73	58	57	67	89	86	38	20
ptc-miR319f	848	1057	1231	836	836	935	917	619	395	20
ptc-miR319g	848	1057	1231	836	836	935	917	619	395	20
ptc-miR319h	43	50	73	58	57	67	89	86	38	20
ptc-miR319i	5	7	5	2	6	6	3	2	2	20
ptc-miR3627a	0	0	0	0	0	0	0	0	1	22
ptc-miR390a	588	711	711	238	252	228	355	427	175	21
ptc-miR390b	584	706	706	232	245	225	344	419	169	21
ptc-miR390c	588	711	711	238	252	228	355	427	175	21
ptc-miR390d-3p	11	15	10	12	8	10	10	6	1	21
ptc-miR390d-5p	584	706	706	232	245	225	344	419	169	21
ptc-miR393a-3p	38	51	67	20	8	9	6	7	1	21
ptc-miR393a-5p	3	6	5	7	6	5	15	11	5	21
ptc-miR393b-3p	38	51	67	20	8	9	6	7	1	21
ptc-miR393b-5p	3	6	5	7	6	5	15	11	5	21
ptc-miR393c	9	17	34	39	51	45	51	65	14	21
ptc-miR394a-3p	25	29	32	19	14	22	30	69	19	20
ptc-miR394a-5p	508	704	1040	556	582	398	242	343	96	20
ptc-miR394b-3p	25	29	32	19	14	22	30	69	19	20
ptc-miR394b-5p	535	730	1043	564	587	398	242	353	105	20
ptc-miR395a	5	7	4	1	2	3	0	5	0	21
ptc-miR395b	197	239	267	60	53	62	56	87	41	21
ptc-miR395c	198	239	267	60	53	62	57	87	41	21
ptc-miR395d	198	239	267	60	53	62	57	87	41	21
ptc-miR395e	198	234	272	61	55	60	55	87	42	21
ptc-miR395f	198	234	272	61	55	60	55	87	42	21
ptc-miR395g	198	239	267	60	53	62	57	87	41	21
ptc-miR395h	198	239	267	60	53	62	57	87	41	21
ptc-miR395i	198	239	267	60	53	62	57	87	41	21
ptc-miR395j	198	239	267	60	53	62	57	87	41	21
ptc-miR395k	198	234	272	61	55	60	55	87	42	21
ptc-miR396a	51	55	71	1727	1589	1432	3799	3271	1577	21
ptc-miR396b	51	55	71	1727	1589	1432	3799	3271	1577	21
ptc-miR396c	444	462	616	1597	1360	1188	3050	1738	1105	21
ptc-miR396d	444	462	616	1597	1360	1188	3052	1738	1105	21
ptc-miR396e-3p	390	452	579	217	131	398	332	229	139	20
ptc-miR396e-5p	450	464	622	1643	1390	1217	3084	1761	1116	21
ptc-miR396f	246	292	292	302	226	280	956	359	303	21
ptc-miR396g-3p	4	0	3	1	2	3	1	4	0	21
ptc-miR396g-5p	441	471	550	555	459	462	1344	589	461	21
ptc-miR397a	297	482	826	850	626	805	681	598	260	21
ptc-miR397b	1	3	4	5	1	4	1	6	0	21
ptc-miR398a	260	313	485	803	685	776	684	1076	563	21
ptc-miR398b	521392	626444	863047	1033667	1025551	967038	916462	1566891	716523	21
ptc-miR398c-3p	521392	626444	863047	1033667	1025551	967038	916462	1566891	716523	21
ptc-miR398c-5p	1642	2144	2283	1374	859	1374	1692	2527	1612	21
ptc-miR399a	2	5	8	13	12	17	4	11	2	21
ptc-miR399b	56	56	89	141	101	197	34	95	39	21
ptc-miR399d	2	3	7	10	12	7	0	11	0	21
ptc-miR399e	23	18	17	21	14	20	11	33	18	21
ptc-miR399f	33	51	73	67	59	42	30	92	41	21
ptc-miR399g	32	51	71	64	58	41	30	90	40	21
ptc-miR399h	16	27	36	44	39	26	26	78	36	21
ptc-miR399i	17	27	37	44	39	26	26	78	36	21
ptc-miR399j	0	0	0	0	0	1	0	0	0	21
ptc-miR403a	57	101	139	88	66	103	178	122	53	21
ptc-miR403b	50	88	131	78	58	93	157	110	48	21
ptc-miR403c-3p	50	87	130	77	57	93	156	110	48	21
ptc-miR403c-5p	590	758	801	609	586	721	836	649	421	21
ptc-miR403d	57	101	139	88	66	103	178	122	53	21
ptc-miR408-3p	194584	256861	312287	677504	570515	916470	1139003	1982898	930005	21
ptc-miR408-5p	1948	2658	2259	1793	1227	3609	2045	10570	3592	21
ptc-miR472a	70890	73862	66896	51914	48269	62591	51606	90454	45379	22
ptc-miR472b	40970	48037	44820	35037	33113	39985	27537	42086	21016	22
ptc-miR474b	0	0	0	0	0	0	3	0	0	24
ptc-miR475a-3p	90	133	198	127	152	100	87	96	38	21
ptc-miR475a-5p	33	32	50	21	15	18	22	10	4	21
ptc-miR475b-3p	91	133	200	127	152	100	87	96	38	21
ptc-miR475b-5p	33	32	50	21	15	18	22	10	4	21
ptc-miR475c	0	0	3	1	5	0	0	0	0	21
ptc-miR475d-3p	3	3	7	7	4	7	1	6	6	21
ptc-miR475d-5p	33	32	50	21	15	18	22	10	4	21
ptc-miR476a	14	13	30	21	8	23	19	13	11	21
ptc-miR476b	0	0	0	1	0	0	0	0	0	21
ptc-miR477a-3p	4	2	7	6	2	1	6	12	0	21
ptc-miR477a-5p	12	16	6	8	6	12	7	31	9	21
ptc-miR477b	12	16	6	8	6	12	7	31	9	21
ptc-miR477d-5p	11	15	21	30	24	26	18	57	23	22
ptc-miR477e-3p	5	6	7	2	0	4	1	13	1	22
ptc-miR477e-5p	3	9	9	4	1	2	4	23	9	20
ptc-miR478a	2	0	0	0	0	0	0	0	2	24
ptc-miR478b	1	0	0	0	0	0	0	0	2	24
ptc-miR478c	1	0	0	0	0	0	0	0	2	24
ptc-miR478e	0	0	0	0	1	0	0	0	0	24
ptc-miR478f	1	1	1	0	0	0	0	0	0	24
ptc-miR478h	0	0	1	0	0	0	0	0	0	24
ptc-miR478i	0	0	1	0	0	0	0	0	0	24
ptc-miR478j	0	0	1	0	0	0	0	0	0	24
ptc-miR478k	0	0	1	0	0	0	0	0	0	24
ptc-miR478l	0	0	1	0	0	0	0	0	0	24
ptc-miR478m	0	0	1	0	0	0	0	0	0	24
ptc-miR478n	0	0	1	0	0	0	0	0	0	24
ptc-miR478o	0	0	1	0	0	0	0	0	0	24
ptc-miR478p	9	3	5	3	0	2	2	8	4	24
ptc-miR478q	0	0	1	0	0	0	0	0	0	24
ptc-miR478r	0	0	1	0	0	0	0	0	0	24
ptc-miR478s	0	0	1	0	0	0	0	0	0	24
ptc-miR481d	11	5	5	1	7	4	4	3	0	24
ptc-miR482a.1	166	189	156	167	127	212	176	315	134	17
ptc-miR482a.2	59646	59775	56217	38472	37291	47347	40606	81986	35723	20
ptc-miR482b-3p	227	264	285	226	214	182	381	261	139	22
ptc-miR482b-5p	75	68	101	74	33	56	49	90	41	21
ptc-miR482c-3p	68	83	85	71	69	59	64	103	52	22
ptc-miR482c-5p	17	10	12	14	4	15	13	42	11	22
ptc-miR482d-3p	1302	1508	1437	1164	1003	1659	2601	5898	2393	22
ptc-miR482d-5p	30	33	34	6	8	2	9	7	2	22
ptc-miR530a	12	27	23	7	12	8	5	16	5	20
ptc-miR530b	0	0	0	1	1	0	1	0	0	20
ptc-miR536	16	11	11	26	15	47	11	84	45	22
ptc-miR6421-3p	52	77	70	33	35	29	84	25	22	21
ptc-miR6421-5p	0	3	5	0	3	4	8	5	2	21
ptc-miR6425a-5p	2	1	1	0	1	0	1	1	0	22
ptc-miR6425b-5p	2	1	1	0	1	0	1	1	0	22
ptc-miR6425c-5p	2	1	1	0	1	0	1	1	0	22
ptc-miR6425d-5p	2	1	1	0	1	0	1	1	0	22
ptc-miR6425e	2	1	1	0	1	0	1	1	0	22
ptc-miR6427-3p	7	11	24	6	6	4	2	2	9	21
ptc-miR6427-5p	58	67	81	57	41	57	77	53	20	22
ptc-miR6437a	7	4	5	2	2	2	1	1	0	22
ptc-miR6437b	7	4	5	2	2	2	1	1	0	22
ptc-miR6438a	3	3	5	8	4	2	3	3	0	22
ptc-miR6438b	3	3	6	8	4	2	3	3	0	22
ptc-miR6442	15	16	12	6	8	2	0	3	0	21
ptc-miR6443	0	1	1	0	0	0	2	0	0	21
ptc-miR6445a	607	843	919	507	336	568	1673	637	491	22
ptc-miR6445b	607	843	919	507	336	568	1673	637	491	22
ptc-miR6446	1	0	0	0	0	0	0	0	0	21
ptc-miR6448	2	1	1	0	1	0	1	0	0	21
ptc-miR6452	0	0	0	0	1	0	0	0	0	21
ptc-miR6456	12	6	14	1	2	1	0	4	0	21
ptc-miR6457a	20	28	35	13	1	5	11	10	3	21
ptc-miR6457b	59	85	74	16	20	16	33	16	8	21
ptc-miR6459a-3p	5	6	19	8	7	6	14	9	3	21
ptc-miR6459a-5p	0	1	1	0	0	1	0	0	0	21
ptc-miR6460	3	1	2	0	1	3	3	0	0	21
ptc-miR6461	0	4	3	0	2	3	4	0	0	21
ptc-miR6462a	0	0	0	0	0	0	0	1	0	21
ptc-miR6468-3p	2	4	0	0	0	1	0	0	0	21
ptc-miR6468-5p	0	5	0	2	0	1	0	3	0	21
ptc-miR6470	0	1	2	0	0	2	4	3	0	21
ptc-miR6471	12	8	6	11	11	6	10	7	4	21
ptc-miR6473	0	2	0	1	3	0	0	2	0	21
ptc-miR6474	4	3	4	2	0	1	1	2	0	21
ptc-miR6476a	3	5	2	4	2	6	11	12	7	20
ptc-miR6476b	3	5	2	4	2	6	11	12	7	20
ptc-miR6476c	3	5	2	4	2	6	11	12	7	20
ptc-miR6477	2	1	1	1	2	1	6	1	1	21
ptc-miR6478	4	5	2	0	0	5	0	6	0	21
ptc-miR7814	0	0	0	0	0	0	1	0	0	21
ptc-miR7817a	0	0	0	1	0	0	0	0	0	21
ptc-miR7819	0	0	0	0	0	0	1	0	0	21
ptc-miR7821	1	0	2	0	0	3	3	1	0	21
ptc-miR7827	5	10	7	6	8	2	16	4	2	21
ptc-miR7828	0	1	0	3	0	0	0	0	0	21
ptc-miR7831	0	4	0	0	0	0	0	0	0	21
ptc-miR7838	0	0	1	0	0	0	0	0	0	21
ptc-miR7839	0	0	0	1	0	0	0	0	0	20
(b) 136 novel miRNAs
miRNA	stage 1-1 count	stage 1-2 count	stage 1-2 count	stage 2-1 count	stage 2-2 count	stage 2-3 count	stage 3-1 count	stage 3-2 count	stage 3-3 count	gene length
novel_miR_1	19	44	36	6	19	12	21	19	18	24
novel_miR_10	13	16	10	15	6	8	20	41	8	24
novel_miR_100	44	39	32	18	17	21	19	41	25	24
novel_miR_101	756	883	1554	397	371	369	345	289	170	22
novel_miR_102	21	21	10	17	6	9	18	17	7	24
novel_miR_103	49	44	49	36	36	31	35	26	21	24
novel_miR_104	47	53	43	24	21	26	28	59	26	24
novel_miR_105	1710	1624	1882	870	791	658	855	593	484	24
novel_miR_106	819	767	757	421	475	302	326	402	292	24
novel_miR_107	94	100	123	52	40	24	7	16	23	24
novel_miR_108	12	12	11	3	4	9	13	14	5	24
novel_miR_109	215	215	222	121	148	157	117	253	146	24
novel_miR_11	59	43	44	25	28	30	45	18	34	24
novel_miR_110	66	70	69	35	42	40	34	31	22	24
novel_miR_111	290	356	269	173	194	154	140	231	122	24
novel_miR_112	82	85	52	19	35	21	25	54	28	24
novel_miR_113	44	40	26	17	17	15	13	13	9	24
novel_miR_114	109	101	106	65	50	48	52	47	50	24
novel_miR_115	1206	1518	1779	1301	1175	1329	1205	1283	752	23
novel_miR_116	2	2	4	1	0	0	3	2	0	24
novel_miR_117	1	8	2	6	1	3	6	19	8	21
novel_miR_118	4	0	2	0	1	0	1	0	0	20
novel_miR_119	6	18	15	9	4	5	3	10	15	21
novel_miR_12	23	23	18	5	5	4	11	7	2	24
novel_miR_120	634	697	618	390	347	286	544	348	313	24
novel_miR_121	15	12	18	7	3	13	7	9	4	24
novel_miR_122	19	17	14	10	6	19	29	14	17	24
novel_miR_123	59	63	47	98	93	95	153	136	83	21
novel_miR_124	28	23	34	27	28	27	22	50	30	24
novel_miR_125	11	11	3	7	6	3	7	5	4	24
novel_miR_126	15	13	20	10	5	12	39	29	24	21
novel_miR_127	9	12	15	19	9	15	15	4	6	22
novel_miR_128	6	4	5	0	1	4	2	0	2	24
novel_miR_129	278	303	363	141	110	98	204	95	84	24
novel_miR_13	6	3	4	0	1	4	3	0	2	24
novel_miR_130	2	2	4	1	0	0	3	2	0	24
novel_miR_131	25	24	20	5	8	14	10	19	16	24
novel_miR_132	20	39	41	19	22	14	11	16	18	24
novel_miR_133	182	238	224	121	115	103	122	154	84	24
novel_miR_134	25	31	23	5	8	14	10	21	16	24
novel_miR_135	291	355	270	173	195	155	140	234	122	24
novel_miR_136	19	28	22	22	19	19	21	7	12	24
novel_miR_137	28	29	22	6	15	14	2	8	2	21
novel_miR_138	16	41	23	26	20	23	30	48	30	24
novel_miR_14	76	72	52	40	25	27	43	29	24	24
novel_miR_15	62	62	57	46	30	58	44	34	31	21
novel_miR_16	9	5	6	6	8	9	10	9	3	24
novel_miR_17	464	523	343	288	246	313	525	862	629	24
novel_miR_18	149	152	161	99	105	92	92	117	54	24
novel_miR_19	10	12	21	59	41	44	253	117	50	22
novel_miR_2	6	10	4	2	0	4	1	8	0	24
novel_miR_20	9	9	4	6	11	15	5	7	8	23
novel_miR_21	45	37	64	6	7	8	4	3	7	24
novel_miR_22	78	63	91	55	19	41	43	29	23	24
novel_miR_23	103	109	54	35	42	22	22	43	27	24
novel_miR_24	17	25	26	7	13	24	12	5	6	24
novel_miR_25	44	40	26	17	17	15	13	13	9	24
novel_miR_26	9	12	15	19	9	15	15	4	6	22
novel_miR_27	5	7	13	3	3	5	11	6	8	21
novel_miR_28	91	57	59	35	39	28	61	51	42	24
novel_miR_29	84	102	64	40	47	46	24	53	41	24
novel_miR_3	20	24	37	99	133	110	136	152	102	24
novel_miR_30	491	535	473	257	313	229	579	761	608	24
novel_miR_31	256	272	223	148	131	90	107	79	62	23
novel_miR_32	25	32	33	11	18	9	28	12	13	24
novel_miR_33	6	4	5	0	1	4	2	0	2	24
novel_miR_34	78	82	52	44	35	23	36	54	43	24
novel_miR_35	0	5	2	11	1	7	13	15	9	21
novel_miR_36	134	133	121	51	63	71	36	53	49	24
novel_miR_37	1	0	2	0	1	0	0	1	0	20
novel_miR_38	20	16	13	13	9	7	4	16	10	24
novel_miR_39	977	923	1027	632	594	512	399	525	251	24
novel_miR_4	12	14	24	16	6	7	12	5	4	24
novel_miR_40	2	2	4	1	0	0	3	2	0	24
novel_miR_41	99	106	118	67	66	23	60	30	33	24
novel_miR_42	83	100	64	43	47	47	24	54	41	24
novel_miR_43	165	215	198	1717	1670	1357	3872	6026	2566	22
novel_miR_44	21	5	6	8	7	5	6	5	12	24
novel_miR_45	83	98	62	38	47	44	24	53	41	24
novel_miR_46	12	19	21	10	6	4	16	6	3	24
novel_miR_47	5	6	7	41	40	28	85	31	21	22
novel_miR_48	74	125	115	199	209	170	526	270	193	21
novel_miR_49	20	36	30	25	20	9	21	36	14	21
novel_miR_5	311	381	292	181	198	168	142	240	138	24
novel_miR_50	85	116	100	38	27	32	58	60	32	24
novel_miR_51	71	84	82	14	22	11	24	10	6	24
novel_miR_52	185	193	195	103	88	107	104	186	112	24
novel_miR_53	13	27	28	29	42	31	45	36	26	21
novel_miR_54	165	215	198	1717	1670	1357	3874	6027	2566	22
novel_miR_56	41	22	27	31	29	25	31	42	26	24
novel_miR_57	67	57	45	37	21	29	40	28	24	24
novel_miR_58	158	177	132	70	74	80	110	221	138	24
novel_miR_59	184	191	195	104	92	110	104	189	112	24
novel_miR_6	139	146	131	88	114	65	154	155	102	24
novel_miR_60	47	53	43	24	21	26	28	59	26	24
novel_miR_61	18	31	25	3	2	4	4	3	1	24
novel_miR_62	124	131	91	79	58	75	64	72	56	24
novel_miR_63	29	43	19	9	12	9	12	29	11	24
novel_miR_64	103	109	54	35	42	22	22	43	27	24
novel_miR_65	108	122	190	147	125	161	58	178	58	21
novel_miR_66	1	0	2	0	1	0	0	1	0	20
novel_miR_67	5	9	3	2	5	2	2	4	0	24
novel_miR_68	4	11	2	3	2	3	0	4	0	24
novel_miR_69	8	15	9	12	12	22	16	24	28	25
novel_miR_7	339	320	399	203	233	261	111	163	66	24
novel_miR_70	15	13	20	10	5	12	39	29	24	21
novel_miR_71	9	23	15	29	14	9	17	14	4	24
novel_miR_72	756	883	1554	397	371	369	345	289	170	22
novel_miR_73	1	0	2	0	1	0	0	1	0	20
novel_miR_74	12	16	8	8	7	24	10	34	20	22
novel_miR_75	62	49	84	78	72	45	52	56	61	24
novel_miR_76	470	481	446	273	337	249	354	368	270	24
novel_miR_77	1	0	2	0	1	0	1	1	0	20
novel_miR_78	205	221	177	120	115	122	314	190	210	24
novel_miR_79	267	210	218	70	72	55	68	78	46	24
novel_miR_8	5	4	8	2	3	0	2	0	0	24
novel_miR_80	7	12	6	0	0	1	5	0	0	24
novel_miR_81	12	18	34	21	9	28	43	29	19	22
novel_miR_82	517	418	453	358	314	311	431	468	263	24
novel_miR_83	109	95	117	35	43	22	17	13	17	24
novel_miR_84	762	654	841	474	510	384	358	455	243	24
novel_miR_85	19	19	21	10	4	4	21	14	7	24
novel_miR_86	8	4	3	4	7	1	11	4	10	21
novel_miR_87	53	52	41	42	44	37	33	97	40	24
novel_miR_89	149	142	189	160	125	111	210	329	202	24
novel_miR_9	99	142	172	57	43	75	76	128	62	24
novel_miR_90	47	62	54	20	24	8	31	27	26	24
novel_miR_91	6	5	14	16	6	9	15	8	0	24
novel_miR_92	50	57	59	30	27	32	32	42	32	24
novel_miR_93	10	12	21	59	41	44	253	117	50	22
novel_miR_94	5	6	7	41	40	28	85	31	21	22
novel_miR_95	125	102	82	41	52	45	80	84	50	24
novel_miR_96	61	140	94	55	51	40	55	43	46	24
novel_miR_97	21	19	23	14	7	10	13	21	4	24
novel_miR_98	41	29	34	16	11	24	6	13	21	24
novel_miR_99	123	117	120	76	79	64	64	54	36	24
