# Supplementary material for: Transcriptome and miRNAs Profiles Reveal Regulatory Network and Key Regulators of Secondary Xylem Formation in “84K” Poplar
Source: Int J Mol Sci. 2023 Nov 17;24(22):16438. doi: 10.3390/ijms242216438 (PMC10671414; doi:10.3390/ijms242216438)
Supplement: Supplementary file 1 [file ijms-24-16438-s001.zip › Supplementary Table S7.xlsx]

## Sheet: Table S7
Supplementary Table S7. Predicted target genes for miR396d and miR395c during secondary growth of "84K" poplar stems.
(a) 123 predicted target genes for miRNA396d
miRNA ID	miRNA Seq	miRNA Length	Target gene ID	Target gene name	COG class annotation	GO annotation	KEGG annotation	KEGG pathway annotation	KOG class	KOG class annotation	Pfam annotation	Swissprot annotation	eggNOG class	eggNOG class annotation	nr annotation
ptc-miR396d	UUCCACAGCUUUCUUGAACUU	21	gene-POPTR_001G082700	GRF8	--	Molecular Function: ATP binding (GO:0005524);; Cellular Component: nucleus (GO:0005634);; Biological Process: regulation of transcription, DNA-templated (GO:0006355);; Cellular Component: chloroplast envelope (GO:0009941);; Biological Process: developmental process (GO:0032502);;	--	--	--	--	WRC;; QLQ	Growth-regulating factor 8 OS=Arabidopsis thaliana OX=3702 GN=GRF8 PE=2 SV=1	K	Transcription	hypothetical protein POPTR_0001s11480g [Populus trichocarpa]
ptc-miR396d	UUCCACAGCUUUCUUGAACUU	21	gene-POPTR_001G114000	GRF12	--	Molecular Function: ATP binding (GO:0005524);; Cellular Component: nucleus (GO:0005634);; Biological Process: regulation of transcription, DNA-templated (GO:0006355);; Biological Process: developmental process (GO:0032502);;	--	--	--	--	WRC;; QLQ	Growth-regulating factor 12 OS=Oryza sativa subsp. japonica OX=39947 GN=GRF12 PE=2 SV=1	K	Transcription	hypothetical protein POPTR_0001s08310g [Populus trichocarpa]
ptc-miR396d	UUCCACAGCUUUCUUGAACUU	21	gene-POPTR_001G132600	GRF4	--	Molecular Function: ATP binding (GO:0005524);; Cellular Component: nucleus (GO:0005634);; Biological Process: regulation of transcription, DNA-templated (GO:0006355);; Biological Process: developmental process (GO:0032502);;	--	--	--	--	WRC;; QLQ	Growth-regulating factor 4 OS=Oryza sativa subsp. japonica OX=39947 GN=GRF4 PE=2 SV=1	K	Transcription	hypothetical protein POPTR_0001s01480g [Populus trichocarpa]
ptc-miR396d	UUCCACAGCUUUCUUGAACUU	21	gene-POPTR_001G169100	GRF5	--	Molecular Function: ATP binding (GO:0005524);; Cellular Component: nucleus (GO:0005634);; Biological Process: regulation of transcription, DNA-templated (GO:0006355);; Biological Process: developmental process (GO:0032502);;	--	--	--	--	WRC;; QLQ	Growth-regulating factor 5 OS=Arabidopsis thaliana OX=3702 GN=GRF5 PE=1 SV=1	K	Transcription	hypothetical protein POPTR_0001s16920g, partial [Populus trichocarpa]
ptc-miR396d	UUCCACAGCUUUCUUGAACUU	21	gene-POPTR_001G187600	NPR4	General function prediction only	Biological Process: signal transduction (GO:0007165);; Cellular Component: integral component of membrane (GO:0016021);;	--	--	[R]	General function prediction only	Ankyrin repeats (3 copies);; Ankyrin repeats (many copies);; Domain of unknown function;; Ankyrin repeat;; Ankyrin repeat;; Ankyrin repeats (many copies)	Ankyrin repeat-containing protein NPR4 OS=Oryza sativa subsp. japonica OX=39947 GN=NPR4 PE=2 SV=1	S	Function unknown	PREDICTED: ankyrin repeat-containing protein At3g12360-like [Populus euphratica]
ptc-miR396d	UUCCACAGCUUUCUUGAACUU	21	gene-POPTR_001G215800		--	--	K09528|5.6151e-135|pop:POPTR_0001s22330g|K09528 DnaJ homolog subfamily C member 8 | (RefSeq) POPTRDRAFT_829583; DNAJ heat shock N-terminal domain-containing family protein	--	[O]	Posttranslational modification, protein turnover, chaperones	DnaJ domain	--	O	Posttranslational modification, protein turnover, chaperones	DNAJ heat shock N-terminal domain-containing family protein [Populus trichocarpa]
ptc-miR396d	UUCCACAGCUUUCUUGAACUU	21	gene-POPTR_001G326500		--	--	K18730|0|pop:POPTR_0001s33430g|K18730 PERQ amino acid-rich with GYF domain-containing protein | (RefSeq) GYF domain-containing family protein	--	[R]	General function prediction only	GYF domain	--	S	Function unknown	PREDICTED: uncharacterized protein LOC105140569 isoform X4 [Populus euphratica]
ptc-miR396d	UUCCACAGCUUUCUUGAACUU	21	gene-POPTR_001G329700		Nucleotide transport and metabolism	Molecular Function: ribonucleoside-diphosphate reductase activity, thioredoxin disulfide as acceptor (GO:0004748);; Cellular Component: ribonucleoside-diphosphate reductase complex (GO:0005971);; Biological Process: deoxyribonucleoside diphosphate metabolic process (GO:0009186);; Biological Process: deoxyribonucleotide biosynthetic process (GO:0009263);; Biological Process: oxidation-reduction pr…	K10808|0|pop:POPTR_0001s33730g|K10808 ribonucleoside-diphosphate reductase subunit M2 [EC:1.17.4.1] | (RefSeq) POPTRDRAFT_752731; ribonucleoside-diphosphate reductase small chain family protein	Glutathione metabolism (ko00480)	[F]	Nucleotide transport and metabolism	Ribonucleotide reductase, small chain	Ribonucleoside-diphosphate reductase small chain OS=Nicotiana tabacum OX=4097 PE=2 SV=1	F	Nucleotide transport and metabolism	ribonucleoside-diphosphate reductase small chain family protein [Populus trichocarpa]
ptc-miR396d	UUCCACAGCUUUCUUGAACUU	21	gene-POPTR_002G029700	RANBPM	--	--	--	--	[Z]	Cytoskeleton	CTLH/CRA C-terminal to LisH motif domain	Ran-binding protein M homolog OS=Arabidopsis thaliana OX=3702 GN=RANBPM PE=1 SV=1	S	Function unknown	RanBPM-related family protein [Populus trichocarpa]
ptc-miR396d	UUCCACAGCUUUCUUGAACUU	21	gene-POPTR_002G030200	DYW7	--	Cellular Component: cytoplasm (GO:0005737);; Molecular Function: zinc ion binding (GO:0008270);; Cellular Component: intracellular membrane-bounded organelle (GO:0043231);;	--	--	[R]	General function prediction only	PPR repeat family;; PPR repeat;; PPR repeat;; Pentatricopeptide repeat domain;; DYW family of nucleic acid deaminases;; Pentacotripeptide-repeat region of PRORP;; Tetratricopeptide repeat;; Mitochondrial ATPase expression	Pentatricopeptide repeat-containing protein At1g19720 OS=Arabidopsis thaliana OX=3702 GN=DYW7 PE=2 SV=1	S	Function unknown	hypothetical protein POPTR_002G030200v3 [Populus trichocarpa]
ptc-miR396d	UUCCACAGCUUUCUUGAACUU	21	gene-POPTR_002G047500	ACA12	Inorganic ion transport and metabolism	Molecular Function: calcium-transporting ATPase activity (GO:0005388);; Molecular Function: ATP binding (GO:0005524);; Cellular Component: integral component of plasma membrane (GO:0005887);; Cellular Component: intracellular membrane-bounded organelle (GO:0043231);; Molecular Function: metal ion binding (GO:0046872);; Biological Process: calcium ion transmembrane transport (GO:0070588);;	K01537|0|pop:POPTR_0002s04840g|K01537 Ca2+-transporting ATPase [EC:3.6.3.8] | (RefSeq) POPTRDRAFT_412082; hypothetical protein	--	[P]	Inorganic ion transport and metabolism	Cation transporting ATPase, C-terminus;; E1-E2 ATPase;; haloacid dehalogenase-like hydrolase;; Cation transport ATPase (P-type);; Cation transporter/ATPase, N-terminus	Calcium-transporting ATPase 12, plasma membrane-type OS=Arabidopsis thaliana OX=3702 GN=ACA12 PE=2 SV=1	P	Inorganic ion transport and metabolism	hypothetical protein POPTR_0002s04840g [Populus trichocarpa]
ptc-miR396d	UUCCACAGCUUUCUUGAACUU	21	gene-POPTR_002G099400	At1g78280	Translation, ribosomal structure and biogenesis	Cellular Component: cytosol (GO:0005829);; Molecular Function: transferase activity (GO:0016740);;	--	--	[BT]	--	Cupin-like domain;; JmjC domain, hydroxylase;; F-box-like;; F-box domain	F-box protein At1g78280 OS=Arabidopsis thaliana OX=3702 GN=At1g78280 PE=2 SV=3	S	Function unknown	hypothetical protein POPTR_0002s09960g [Populus trichocarpa]
ptc-miR396d	UUCCACAGCUUUCUUGAACUU	21	gene-POPTR_002G115100	GRF1	--	Molecular Function: ATP binding (GO:0005524);; Cellular Component: nucleus (GO:0005634);; Biological Process: regulation of transcription, DNA-templated (GO:0006355);; Biological Process: developmental process (GO:0032502);;	--	--	--	--	WRC;; QLQ	Growth-regulating factor 1 OS=Arabidopsis thaliana OX=3702 GN=GRF1 PE=1 SV=1	--	--	hypothetical protein POPTR_002G115100v3 [Populus trichocarpa]
ptc-miR396d	UUCCACAGCUUUCUUGAACUU	21	gene-POPTR_002G192400	LACS1	Lipid transport and metabolism	Biological Process: long-chain fatty acid metabolic process (GO:0001676);; Molecular Function: long-chain fatty acid-CoA ligase activity (GO:0004467);; Cellular Component: endoplasmic reticulum (GO:0005783);; Biological Process: wax biosynthetic process (GO:0010025);; Biological Process: cutin biosynthetic process (GO:0010143);; Molecular Function: very long-chain fatty acid-CoA ligase activity (…	K01897|0|pop:POPTR_0002s19330g|K01897 long-chain acyl-CoA synthetase [EC:6.2.1.3] | (RefSeq) POPTRDRAFT_850795; hypothetical protein	Peroxisome (ko04146)	[I]	Lipid transport and metabolism	AMP-binding enzyme	Long chain acyl-CoA synthetase 1 OS=Arabidopsis thaliana OX=3702 GN=LACS1 PE=2 SV=1	I	Lipid transport and metabolism	hypothetical protein POPTR_0002s19330g [Populus trichocarpa]
ptc-miR396d	UUCCACAGCUUUCUUGAACUU	21	gene-POPTR_002G197400	At4g02110	--	Molecular Function: zinc ion binding (GO:0008270);;	K10728|0|pop:POPTR_0002s19850g|K10728 topoisomerase (DNA) II binding protein 1 | (RefSeq) POPTRDRAFT_755635; BRCT domain-containing family protein	--	[L]	Replication, recombination and repair	twin BRCT domain;; BRCA1 C Terminus (BRCT) domain;; BRCT domain, a BRCA1 C-terminus domain;; Regulator of Ty1 transposition protein 107 BRCT domain	BRCT domain-containing protein At4g02110 OS=Arabidopsis thaliana OX=3702 GN=At4g02110 PE=4 SV=3	S	Function unknown	PREDICTED: BRCT domain-containing protein At4g02110-like isoform X1 [Populus euphratica]
ptc-miR396d	UUCCACAGCUUUCUUGAACUU	21	gene-POPTR_002G256600	IAA11	--	Cellular Component: nucleus (GO:0005634);; Biological Process: regulation of transcription, DNA-templated (GO:0006355);; Cellular Component: plasmodesma (GO:0009506);; Biological Process: auxin-activated signaling pathway (GO:0009734);;	K14484|7.10948e-159|pop:POPTR_0002s25830g|K14484 auxin-responsive protein IAA | (RefSeq) POPTRDRAFT_710452; auxin-responsive family protein	Plant hormone signal transduction (ko04075)	--	--	AUX/IAA family	Auxin-responsive protein IAA11 OS=Arabidopsis thaliana OX=3702 GN=IAA11 PE=1 SV=1	--	--	hypothetical protein POPTR_0002s25830g [Populus trichocarpa]
ptc-miR396d	UUCCACAGCUUUCUUGAACUU	21	gene-POPTR_003G023800	SC35	Translation, ribosomal structure and biogenesis	Molecular Function: nucleotide binding (GO:0000166);; Molecular Function: RNA binding (GO:0003723);;	K12891|3.86482e-69|pop:POPTR_0003s01810g|K12891 splicing factor, arginine/serine-rich 2 | (RefSeq) hypothetical protein	Spliceosome (ko03040)	[A]	RNA processing and modification	RNA recognition motif. (a.k.a. RRM, RBD, or RNP domain)	Serine/arginine-rich splicing factor SC35 OS=Arabidopsis thaliana OX=3702 GN=SC35 PE=1 SV=1	A	RNA processing and modification	hypothetical protein POPTR_0003s01810g [Populus trichocarpa]
ptc-miR396d	UUCCACAGCUUUCUUGAACUU	21	gene-POPTR_003G036800		Inorganic ion transport and metabolism	--	--	--	--	--	Beta-lactamase superfamily domain;; Metallo-beta-lactamase superfamily	--	S	Function unknown	hypothetical protein POPTR_003G040200v3 [Populus trichocarpa]
ptc-miR396d	UUCCACAGCUUUCUUGAACUU	21	gene-POPTR_003G040200		Inorganic ion transport and metabolism	--	--	--	--	--	Beta-lactamase superfamily domain;; Metallo-beta-lactamase superfamily	--	S	Function unknown	hypothetical protein POPTR_003G040200v3 [Populus trichocarpa]
ptc-miR396d	UUCCACAGCUUUCUUGAACUU	21	gene-POPTR_003G050600	FTSHI2	Posttranslational modification, protein turnover, chaperones	Molecular Function: ATP-dependent peptidase activity (GO:0004176);; Molecular Function: metalloendopeptidase activity (GO:0004222);; Molecular Function: ATP binding (GO:0005524);; Cellular Component: mitochondrion (GO:0005739);; Biological Process: proteolysis (GO:0006508);; Molecular Function: microtubule-severing ATPase activity (GO:0008568);; Cellular Component: chloroplast envelope (GO:000994…	--	--	[O]	Posttranslational modification, protein turnover, chaperones	ATPase family associated with various cellular activities (AAA);; Holliday junction DNA helicase ruvB N-terminus;; AAA domain (Cdc48 subfamily)	Probable inactive ATP-dependent zinc metalloprotease FTSHI 2, chloroplastic OS=Arabidopsis thaliana OX=3702 GN=FTSHI2 PE=1 SV=1	O	Posttranslational modification, protein turnover, chaperones	hypothetical protein POPTR_003G050600v3 [Populus trichocarpa]
ptc-miR396d	UUCCACAGCUUUCUUGAACUU	21	gene-POPTR_003G065000	GRF5	--	Molecular Function: ATP binding (GO:0005524);; Cellular Component: nucleus (GO:0005634);; Biological Process: regulation of transcription, DNA-templated (GO:0006355);; Biological Process: developmental process (GO:0032502);;	--	--	--	--	WRC;; QLQ	Growth-regulating factor 5 OS=Arabidopsis thaliana OX=3702 GN=GRF5 PE=1 SV=1	K	Transcription	hypothetical protein POPTR_003G065000v3, partial [Populus trichocarpa]
ptc-miR396d	UUCCACAGCUUUCUUGAACUU	21	gene-POPTR_003G076200	SFH11	--	Molecular Function: transporter activity (GO:0005215);; Cellular Component: intracellular (GO:0005622);; Biological Process: transport (GO:0006810);;	--	--	[I]	Lipid transport and metabolism	CRAL/TRIO domain	Phosphatidylinositol/phosphatidylcholine transfer protein SFH11 OS=Arabidopsis thaliana OX=3702 GN=SFH11 PE=3 SV=1	S	Function unknown	PREDICTED: phosphatidylinositol/phosphatidylcholine transfer protein SFH11 isoform X1 [Populus euphratica]
ptc-miR396d	UUCCACAGCUUUCUUGAACUU	21	gene-POPTR_003G100800	GRF3	--	Molecular Function: ATP binding (GO:0005524);; Cellular Component: nucleus (GO:0005634);; Biological Process: regulation of transcription, DNA-templated (GO:0006355);; Biological Process: developmental process (GO:0032502);;	--	--	--	--	WRC;; QLQ	Growth-regulating factor 3 OS=Oryza sativa subsp. japonica OX=39947 GN=GRF3 PE=3 SV=2	K	Transcription	hypothetical protein POPTR_003G100800v3 [Populus trichocarpa]
ptc-miR396d	UUCCACAGCUUUCUUGAACUU	21	gene-POPTR_003G116100	PCMP-E6	--	--	--	--	[R]	General function prediction only	PPR repeat;; PPR repeat family;; PPR repeat;; Pentatricopeptide repeat domain;; Pentacotripeptide-repeat region of PRORP;; Tetratricopeptide repeat	Pentatricopeptide repeat-containing protein At4g22760 OS=Arabidopsis thaliana OX=3702 GN=PCMP-E6 PE=2 SV=1	S	Function unknown	pentatricopeptide repeat-containing family protein [Populus trichocarpa]
ptc-miR396d	UUCCACAGCUUUCUUGAACUU	21	gene-POPTR_003G183400		--	Cellular Component: cytoplasm (GO:0005737);; Biological Process: ER to Golgi vesicle-mediated transport (GO:0006888);;	K20301|3.05791e-65|pop:POPTR_0001s03500g|K20301 trafficking protein particle complex subunit 2 | (RefSeq) hypothetical protein	--	[U]	Intracellular trafficking, secretion, and vesicular transport	Sedlin, N-terminal conserved region;; Sedlin, N-terminal conserved region;; Sybindin-like family	--	U	Intracellular trafficking, secretion, and vesicular transport	PREDICTED: trafficking protein particle complex subunit 2 isoform X1 [Prunus mume]
ptc-miR396d	UUCCACAGCUUUCUUGAACUU	21	gene-POPTR_003G202800	UBP24	--	Cellular Component: nucleus (GO:0005634);; Biological Process: ubiquitin-dependent protein catabolic process (GO:0006511);; Biological Process: protein deubiquitination (GO:0016579);; Molecular Function: thiol-dependent ubiquitinyl hydrolase activity (GO:0036459);;	K11841|0|pop:POPTR_0003s20160g|K11841 ubiquitin carboxyl-terminal hydrolase 10 [EC:3.4.19.12] | (RefSeq) POPTRDRAFT_817608; hypothetical protein	--	[O]	Posttranslational modification, protein turnover, chaperones	Ubiquitin carboxyl-terminal hydrolase;; Ubiquitin carboxyl-terminal hydrolase	Ubiquitin carboxyl-terminal hydrolase 24 OS=Arabidopsis thaliana OX=3702 GN=UBP24 PE=1 SV=1	O	Posttranslational modification, protein turnover, chaperones	hypothetical protein POPTR_0003s20160g [Populus trichocarpa]
ptc-miR396d	UUCCACAGCUUUCUUGAACUU	21	gene-POPTR_004G012600	CRK10	--	Molecular Function: protein serine/threonine kinase activity (GO:0004674);; Molecular Function: ATP binding (GO:0005524);; Cellular Component: plasma membrane (GO:0005886);; Biological Process: protein phosphorylation (GO:0006468);; Biological Process: defense response (GO:0006952);; Cellular Component: plasmodesma (GO:0009506);; Cellular Component: integral component of membrane (GO:0016021);;	--	--	--	--	Protein tyrosine kinase	Cysteine-rich receptor-like protein kinase 10 OS=Arabidopsis thaliana OX=3702 GN=CRK10 PE=1 SV=3	--	--	hypothetical protein POPTR_0004s01260g [Populus trichocarpa]
ptc-miR396d	UUCCACAGCUUUCUUGAACUU	21	gene-POPTR_004G046801	BAC1	--	Molecular Function: structural constituent of ribosome (GO:0003735);; Molecular Function: L-histidine transmembrane transporter activity (GO:0005290);; Biological Process: translation (GO:0006412);; Molecular Function: arginine transmembrane transporter activity (GO:0015181);; Molecular Function: L-lysine transmembrane transporter activity (GO:0015189);; Cellular Component: integral component of …	K15109|9.60278e-136|pop:POPTR_0011s05500g|K15109 solute carrier family 25 (mitochondrial carnitine/acylcarnitine transporter), member 20/29 | (RefSeq) mitochondrial substrate carrier family protein	--	[C]	Energy production and conversion	Mitochondrial carrier protein;; Mitochondrial carrier protein	Mitochondrial arginine transporter BAC1 OS=Arabidopsis thaliana OX=3702 GN=BAC1 PE=1 SV=1	S	Function unknown	hypothetical protein POPTR_004G046800v3 [Populus trichocarpa]
ptc-miR396d	UUCCACAGCUUUCUUGAACUU	21	gene-POPTR_004G118950		--	--	--	--	--	--	--	--	S	Function unknown	PREDICTED: uncharacterized protein LOC105117473 [Populus euphratica]
ptc-miR396d	UUCCACAGCUUUCUUGAACUU	21	gene-POPTR_005G023500	RPL18B	--	Molecular Function: RNA binding (GO:0003723);; Molecular Function: structural constituent of ribosome (GO:0003735);; Biological Process: translation (GO:0006412);; Cellular Component: cytosolic large ribosomal subunit (GO:0022625);;	K02883|8.75592e-119|pop:POPTR_0005s02330g|K02883 large subunit ribosomal protein L18e | (RefSeq) 60S ribosomal protein L18	Ribosome (ko03010)	[J]	Translation, ribosomal structure and biogenesis	Ribosomal protein 60S L18 and 50S L18e;; Ribosomal proteins 50S-L15, 50S-L18e, 60S-L27A	60S ribosomal protein L18-2 OS=Arabidopsis thaliana OX=3702 GN=RPL18B PE=1 SV=2	J	Translation, ribosomal structure and biogenesis	60S ribosomal protein L18 [Populus trichocarpa]
ptc-miR396d	UUCCACAGCUUUCUUGAACUU	21	gene-POPTR_005G033700	MIRO1	--	Molecular Function: GTPase activity (GO:0003924);; Molecular Function: calcium ion binding (GO:0005509);; Molecular Function: GTP binding (GO:0005525);; Biological Process: mitochondrion organization (GO:0007005);; Biological Process: small GTPase mediated signal transduction (GO:0007264);; Cellular Component: integral component of mitochondrial outer membrane (GO:0031307);;	K07870|0|pop:POPTR_0005s03670g|K07870 Ras homolog gene family, member T1 | (RefSeq) hypothetical protein	--	[V]	Defense mechanisms	EF hand associated;; Ras family;; EF hand associated;; Ras of Complex, Roc, domain of DAPkinase;; 50S ribosome-binding GTPase;; EF-hand domain;; Dynamin family	Mitochondrial Rho GTPase 1 OS=Arabidopsis thaliana OX=3702 GN=MIRO1 PE=1 SV=1	S	Function unknown	hypothetical protein POPTR_0005s03670g [Populus trichocarpa]
ptc-miR396d	UUCCACAGCUUUCUUGAACUU	21	gene-POPTR_005G040500		--	Cellular Component: integral component of membrane (GO:0016021);;	--	--	--	--	--	--	S	Function unknown	hypothetical protein POPTR_005G040500v3 [Populus trichocarpa]
ptc-miR396d	UUCCACAGCUUUCUUGAACUU	21	gene-POPTR_005G067100	TOP3A	Replication, recombination and repair	Biological Process: resolution of meiotic recombination intermediates (GO:0000712);; Molecular Function: DNA binding (GO:0003677);; Molecular Function: DNA topoisomerase type I activity (GO:0003917);; Cellular Component: chromosome (GO:0005694);; Biological Process: DNA topological change (GO:0006265);; Biological Process: DNA repair (GO:0006281);; Biological Process: mitotic cell cycle (GO:00070…	K03165|0|pop:POPTR_0005s06810g|K03165 DNA topoisomerase III [EC:5.99.1.2] | (RefSeq) POPTRDRAFT_861019; hypothetical protein	Homologous recombination (ko03440)	[L]	Replication, recombination and repair	DNA topoisomerase;; Toprim domain;; GRF zinc finger;; Topoisomerase DNA binding C4 zinc finger	DNA topoisomerase 3-alpha OS=Arabidopsis thaliana OX=3702 GN=TOP3A PE=1 SV=1	L	Replication, recombination and repair	hypothetical protein POPTR_005G067100v3 [Populus trichocarpa]
ptc-miR396d	UUCCACAGCUUUCUUGAACUU	21	gene-POPTR_005G090600	At5g08310	--	--	--	--	[R]	General function prediction only	PPR repeat family;; PPR repeat;; PPR repeat;; Pentatricopeptide repeat domain;; Pentacotripeptide-repeat region of PRORP;; Mitochondrial 28S ribosomal protein S27	Putative pentatricopeptide repeat-containing protein At5g08310, mitochondrial OS=Arabidopsis thaliana OX=3702 GN=At5g08310 PE=3 SV=1	S	Function unknown	hypothetical protein POPTR_005G090600v3 [Populus trichocarpa]
ptc-miR396d	UUCCACAGCUUUCUUGAACUU	21	gene-POPTR_005G140200	CLF	General function prediction only	Cellular Component: PcG protein complex (GO:0031519);;	K11430|0|pop:POPTR_0005s18340g|K11430 histone-lysine N-methyltransferase EZH2 [EC:2.1.1.43] | (RefSeq) POPTRDRAFT_818400; Polycomb group protein CURLY LEAF	--	[K]	Transcription	SET domain	Histone-lysine N-methyltransferase CLF OS=Arabidopsis thaliana OX=3702 GN=CLF PE=1 SV=2	S	Function unknown	hypothetical protein POPTR_005G140200v3 [Populus trichocarpa]
ptc-miR396d	UUCCACAGCUUUCUUGAACUU	21	gene-POPTR_005G141600	GCP1	Posttranslational modification, protein turnover, chaperones	Molecular Function: cysteine-type endopeptidase activity (GO:0004197);; Cellular Component: extracellular space (GO:0005615);; Cellular Component: lysosome (GO:0005764);; Molecular Function: 2-alkenal reductase [NAD(P)] activity (GO:0032440);; Biological Process: proteolysis involved in cellular protein catabolic process (GO:0051603);; Biological Process: oxidation-reduction process (GO:0055114);;	--	--	[O]	Posttranslational modification, protein turnover, chaperones	Papain family cysteine protease;; Cathepsin propeptide inhibitor domain (I29);; Peptidase C1-like family	Germination-specific cysteine protease 1 OS=Arabidopsis thaliana OX=3702 GN=GCP1 PE=2 SV=2	O	Posttranslational modification, protein turnover, chaperones	hypothetical protein POPTR_005G141600v3 [Populus trichocarpa]
ptc-miR396d	UUCCACAGCUUUCUUGAACUU	21	gene-POPTR_005G209500	CSP41A	Cell wall/membrane/envelope biogenesis	Molecular Function: catalytic activity (GO:0003824);; Molecular Function: coenzyme binding (GO:0050662);;	--	--	--	--	NAD dependent epimerase/dehydratase family;; NAD(P)H-binding	Chloroplast stem-loop binding protein of 41 kDa a, chloroplastic OS=Arabidopsis thaliana OX=3702 GN=CSP41A PE=1 SV=1	S	Function unknown	hypothetical protein POPTR_0005s23110g [Populus trichocarpa]
ptc-miR396d	UUCCACAGCUUUCUUGAACUU	21	gene-POPTR_005G215800	CYP63	Posttranslational modification, protein turnover, chaperones	Biological Process: protein peptidyl-prolyl isomerization (GO:0000413);; Molecular Function: peptidyl-prolyl cis-trans isomerase activity (GO:0003755);; Biological Process: protein folding (GO:0006457);;	K09566|0|pop:POPTR_0005s23730g|K09566 peptidyl-prolyl isomerase G (cyclophilin G) [EC:5.2.1.8] | (RefSeq) POPTRDRAFT_862157; hypothetical protein	--	[O]	Posttranslational modification, protein turnover, chaperones	Cyclophilin type peptidyl-prolyl cis-trans isomerase/CLD	Peptidyl-prolyl cis-trans isomerase CYP63 OS=Arabidopsis thaliana OX=3702 GN=CYP63 PE=1 SV=1	O	Posttranslational modification, protein turnover, chaperones	hypothetical protein POPTR_0005s23730g [Populus trichocarpa]
ptc-miR396d	UUCCACAGCUUUCUUGAACUU	21	gene-POPTR_005G222200		--	Cellular Component: endoplasmic reticulum (GO:0005783);; Cellular Component: integral component of membrane (GO:0016021);;	--	--	--	--	HR-like lesion-inducing	--	S	Function unknown	lesion inducing family protein [Populus trichocarpa]
ptc-miR396d	UUCCACAGCUUUCUUGAACUU	21	gene-POPTR_005G234800		--	--	K14798|0|pop:POPTR_0005s25610g|K14798 protein LTV1 | (RefSeq) POPTRDRAFT_831663; hypothetical protein	--	[S]	Function unknown	Low temperature viability protein	--	S	Function unknown	hypothetical protein POPTR_005G234800v3 [Populus trichocarpa]
ptc-miR396d	UUCCACAGCUUUCUUGAACUU	21	gene-POPTR_005G252300	EMB975	Function unknown	--	--	--	[R]	General function prediction only	PPR repeat family;; Pentatricopeptide repeat domain;; PPR repeat	Pentatricopeptide repeat-containing protein At2g01860 OS=Arabidopsis thaliana OX=3702 GN=EMB975 PE=2 SV=1	S	Function unknown	hypothetical protein POPTR_005G252300v3 [Populus trichocarpa]
ptc-miR396d	UUCCACAGCUUUCUUGAACUU	21	gene-POPTR_006G040000	At2g26850	--	--	--	--	--	--	F-box domain	F-box protein At2g26850 OS=Arabidopsis thaliana OX=3702 GN=At2g26850 PE=2 SV=1	S	Function unknown	hypothetical protein POPTR_0006s03840g [Populus trichocarpa]
ptc-miR396d	UUCCACAGCUUUCUUGAACUU	21	gene-POPTR_006G066800	TPR4	General function prediction only	Biological Process: regulation of transcription, DNA-templated (GO:0006355);;	--	--	[R]	General function prediction only	WD domain, G-beta repeat;; Anaphase-promoting complex subunit 4 WD40 domain	Topless-related protein 4 OS=Arabidopsis thaliana OX=3702 GN=TPR4 PE=1 SV=2	S	Function unknown	WD-40 repeat family protein [Populus trichocarpa]
ptc-miR396d	UUCCACAGCUUUCUUGAACUU	21	gene-POPTR_006G089600	ZFP10	--	Molecular Function: transcription factor activity, sequence-specific DNA binding (GO:0003700);; Cellular Component: nucleus (GO:0005634);; Biological Process: regulation of transcription, DNA-templated (GO:0006355);; Molecular Function: sequence-specific DNA binding (GO:0043565);; Molecular Function: transcription regulatory region DNA binding (GO:0044212);; Molecular Function: metal ion binding …	--	--	--	--	--	Zinc finger protein 10 OS=Arabidopsis thaliana OX=3702 GN=ZFP10 PE=2 SV=1	S	Function unknown	RABBIT EARS family protein [Populus trichocarpa]
ptc-miR396d	UUCCACAGCUUUCUUGAACUU	21	gene-POPTR_006G103800		--	--	--	--	--	--	--	--	S	Function unknown	hypothetical protein POPTR_0006s10470g [Populus trichocarpa]
ptc-miR396d	UUCCACAGCUUUCUUGAACUU	21	gene-POPTR_006G115200	GRF4	--	Molecular Function: ATP binding (GO:0005524);; Cellular Component: nucleus (GO:0005634);; Biological Process: regulation of transcription, DNA-templated (GO:0006355);; Biological Process: developmental process (GO:0032502);;	--	--	--	--	WRC;; QLQ	Growth-regulating factor 4 OS=Arabidopsis thaliana OX=3702 GN=GRF4 PE=1 SV=1	K	Transcription	PREDICTED: growth-regulating factor 3 isoform X1 [Populus euphratica]
ptc-miR396d	UUCCACAGCUUUCUUGAACUU	21	gene-POPTR_006G143200	GRF5	--	Molecular Function: ATP binding (GO:0005524);; Cellular Component: nucleus (GO:0005634);; Biological Process: regulation of transcription, DNA-templated (GO:0006355);; Biological Process: developmental process (GO:0032502);;	--	--	--	--	WRC;; QLQ	Growth-regulating factor 5 OS=Arabidopsis thaliana OX=3702 GN=GRF5 PE=1 SV=1	K	Transcription	hypothetical protein POPTR_006G143200v3 [Populus trichocarpa]
ptc-miR396d	UUCCACAGCUUUCUUGAACUU	21	gene-POPTR_006G186301	At1g51120	--	Molecular Function: DNA binding (GO:0003677);; Molecular Function: transcription factor activity, sequence-specific DNA binding (GO:0003700);; Cellular Component: nucleus (GO:0005634);; Biological Process: regulation of transcription, DNA-templated (GO:0006355);; Biological Process: lipid metabolic process (GO:0006629);; Molecular Function: phosphoric diester hydrolase activity (GO:0008081);;	K09287|2.69888e-180|pop:POPTR_0018s11780g|K09287 RAV-like factor | (RefSeq) POPTRDRAFT_779580; hypothetical protein	--	--	--	B3 DNA binding domain;; AP2 domain	AP2/ERF and B3 domain-containing transcription factor At1g51120 OS=Arabidopsis thaliana OX=3702 GN=At1g51120 PE=2 SV=1	K	Transcription	PREDICTED: AP2/ERF and B3 domain-containing transcription factor At1g51120-like [Populus euphratica]
ptc-miR396d	UUCCACAGCUUUCUUGAACUU	21	gene-POPTR_006G191800		--	--	--	--	--	--	--	--	S	Function unknown	hypothetical protein POPTR_0006s20610g [Populus trichocarpa]
ptc-miR396d	UUCCACAGCUUUCUUGAACUU	21	gene-POPTR_006G208500	S-RBP11	Translation, ribosomal structure and biogenesis	Molecular Function: nucleotide binding (GO:0000166);; Molecular Function: nucleic acid binding (GO:0003676);;	K13195|1.32684e-86|pop:POPTR_0644s00220g|K13195 cold-inducible RNA-binding protein | (RefSeq) RNA-binding family protein	--	[R]	General function prediction only	RNA recognition motif. (a.k.a. RRM, RBD, or RNP domain);; Nup53/35/40-type RNA recognition motif	Small RNA-binding protein 11, chloroplastic OS=Arabidopsis thaliana OX=3702 GN=S-RBP11 PE=2 SV=1	S	Function unknown	RNA-binding family protein [Populus trichocarpa]
ptc-miR396d	UUCCACAGCUUUCUUGAACUU	21	gene-POPTR_006G247300	PNSB3	Energy production and conversion	Molecular Function: electron carrier activity (GO:0009055);; Molecular Function: metal ion binding (GO:0046872);; Molecular Function: iron-sulfur cluster binding (GO:0051536);;	--	--	--	--	2Fe-2S iron-sulfur cluster binding domain	Photosynthetic NDH subunit of subcomplex B 3, chloroplastic OS=Arabidopsis thaliana OX=3702 GN=PNSB3 PE=2 SV=1	C	Energy production and conversion	ferredoxin-related family protein [Populus trichocarpa]
ptc-miR396d	UUCCACAGCUUUCUUGAACUU	21	gene-POPTR_006G251700	OCP3	--	Molecular Function: DNA binding (GO:0003677);; Cellular Component: nucleus (GO:0005634);;	--	--	--	--	Homeobox domain	Protein OVEREXPRESSOR OF CATIONIC PEROXIDASE 3 OS=Arabidopsis thaliana OX=3702 GN=OCP3 PE=1 SV=1	K	Transcription	hypothetical protein POPTR_006G251700v3 [Populus trichocarpa]
ptc-miR396d	UUCCACAGCUUUCUUGAACUU	21	gene-POPTR_006G253500	RDR6	--	Molecular Function: nucleotide binding (GO:0000166);; Biological Process: transcription, RNA-templated (GO:0001172);; Molecular Function: nucleic acid binding (GO:0003676);; Molecular Function: RNA-directed 5'-3' RNA polymerase activity (GO:0003968);; Cellular Component: nucleus (GO:0005634);; Biological Process: virus induced gene silencing (GO:0009616);; Biological Process: production of ta-siR…	K11699|0|pop:POPTR_0006s26980g|K11699 RNA-dependent RNA polymerase [EC:2.7.7.48] | (RefSeq) POPTRDRAFT_561891; SILENCING DEFECTIVE 1 family protein	--	[A]	RNA processing and modification	RNA dependent RNA polymerase	RNA-dependent RNA polymerase 6 OS=Arabidopsis thaliana OX=3702 GN=RDR6 PE=1 SV=1	K	Transcription	SILENCING DEFECTIVE 1 family protein [Populus trichocarpa]
ptc-miR396d	UUCCACAGCUUUCUUGAACUU	21	gene-POPTR_007G004900	DG1	--	Molecular Function: nucleotide binding (GO:0000166);; Biological Process: transcription from plastid promoter (GO:0042793);;	--	--	[R]	General function prediction only	PPR repeat family;; PPR repeat;; Pentatricopeptide repeat domain;; PPR repeat;; Pentacotripeptide-repeat region of PRORP	Pentatricopeptide repeat-containing protein At5g67570, chloroplastic OS=Arabidopsis thaliana OX=3702 GN=DG1 PE=1 SV=2	S	Function unknown	hypothetical protein POPTR_007G004900v3 [Populus trichocarpa]
ptc-miR396d	UUCCACAGCUUUCUUGAACUU	21	gene-POPTR_007G007100	GRF1	--	Molecular Function: ATP binding (GO:0005524);; Cellular Component: nucleus (GO:0005634);; Biological Process: regulation of transcription, DNA-templated (GO:0006355);; Biological Process: developmental process (GO:0032502);;	--	--	--	--	WRC;; QLQ	Growth-regulating factor 1 OS=Arabidopsis thaliana OX=3702 GN=GRF1 PE=1 SV=1	K	Transcription	hypothetical protein POPTR_007G007100v3 [Populus trichocarpa]
ptc-miR396d	UUCCACAGCUUUCUUGAACUU	21	gene-POPTR_007G021300	SAMT	Lipid transport and metabolism	Molecular Function: jasmonate O-methyltransferase activity (GO:0030795);; Biological Process: methylation (GO:0032259);;	K08241|0|tcc:TCM_000324|K08241 jasmonate O-methyltransferase [EC:2.1.1.141] | (RefSeq) Salicylate O-methyltransferase	alpha-Linolenic acid metabolism (ko00592)	--	--	SAM dependent carboxyl methyltransferase	Salicylate carboxymethyltransferase OS=Clarkia breweri OX=36903 GN=SAMT PE=1 SV=1	S	Function unknown	unknown [Populus trichocarpa]
ptc-miR396d	UUCCACAGCUUUCUUGAACUU	21	gene-POPTR_007G025400	At3g50860	--	Cellular Component: Golgi apparatus (GO:0005794);; Biological Process: intracellular protein transport (GO:0006886);; Molecular Function: protein transporter activity (GO:0008565);; Biological Process: vesicle-mediated transport (GO:0016192);; Cellular Component: AP-3 adaptor complex (GO:0030123);; Cellular Component: clathrin vesicle coat (GO:0030125);;	K12399|4.28131e-114|pop:POPTR_0007s12840g|K12399 AP-3 complex subunit sigma | (RefSeq) POPTRDRAFT_719511; clathrin adaptor complex small chain family protein	--	[U]	Intracellular trafficking, secretion, and vesicular transport	Clathrin adaptor complex small chain	AP-3 complex subunit sigma OS=Arabidopsis thaliana OX=3702 GN=At3g50860 PE=2 SV=1	U	Intracellular trafficking, secretion, and vesicular transport	hypothetical protein POPTR_007G025400v3 [Populus trichocarpa]
ptc-miR396d	UUCCACAGCUUUCUUGAACUU	21	gene-POPTR_007G047600	RD21A	Posttranslational modification, protein turnover, chaperones	Molecular Function: cysteine-type endopeptidase activity (GO:0004197);; Cellular Component: extracellular space (GO:0005615);; Cellular Component: lysosome (GO:0005764);; Molecular Function: 2-alkenal reductase [NAD(P)] activity (GO:0032440);; Biological Process: proteolysis involved in cellular protein catabolic process (GO:0051603);; Biological Process: oxidation-reduction process (GO:0055114);;	--	--	[O]	Posttranslational modification, protein turnover, chaperones	Papain family cysteine protease;; Cathepsin propeptide inhibitor domain (I29);; Peptidase C1-like family	Cysteine proteinase RD21A OS=Arabidopsis thaliana OX=3702 GN=RD21A PE=1 SV=1	O	Posttranslational modification, protein turnover, chaperones	hypothetical protein POPTR_0007s10650g [Populus trichocarpa]
ptc-miR396d	UUCCACAGCUUUCUUGAACUU	21	gene-POPTR_007G090400	ACX2	Lipid transport and metabolism	Molecular Function: fatty-acyl-CoA binding (GO:0000062);; Molecular Function: acyl-CoA dehydrogenase activity (GO:0003995);; Molecular Function: acyl-CoA oxidase activity (GO:0003997);; Cellular Component: peroxisome (GO:0005777);; Molecular Function: electron carrier activity (GO:0009055);; Biological Process: fatty acid beta-oxidation using acyl-CoA dehydrogenase (GO:0033539);; Molecular Functi…	K00232|0|pop:POPTR_0007s05710g|K00232 acyl-CoA oxidase [EC:1.3.3.6] | (RefSeq) POPTRDRAFT_832274; acyl CoA oxidase family protein	Peroxisome (ko04146)	[IQ]	--	Acyl-CoA oxidase;; Acyl-CoA dehydrogenase, middle domain;; Acyl-CoA dehydrogenase, C-terminal domain	Acyl-coenzyme A oxidase 2, peroxisomal OS=Arabidopsis thaliana OX=3702 GN=ACX2 PE=1 SV=2	I	Lipid transport and metabolism	acyl CoA oxidase family protein [Populus trichocarpa]
ptc-miR396d	UUCCACAGCUUUCUUGAACUU	21	gene-POPTR_007G146900	MLO1	--	Molecular Function: calmodulin binding (GO:0005516);; Cellular Component: plasma membrane (GO:0005886);; Biological Process: defense response (GO:0006952);; Biological Process: response to biotic stimulus (GO:0009607);; Cellular Component: integral component of membrane (GO:0016021);;	K08472|0|pop:POPTR_0007s00240g|K08472 mlo protein | (RefSeq) POPTRDRAFT_1081730; hypothetical protein	--	--	--	Mlo family	MLO-like protein 1 OS=Arabidopsis thaliana OX=3702 GN=MLO1 PE=1 SV=1	D	Cell cycle control, cell division, chromosome partitioning	hypothetical protein POPTR_007G146900v3 [Populus trichocarpa]
ptc-miR396d	UUCCACAGCUUUCUUGAACUU	21	gene-POPTR_008G032100	SKS2	Cell cycle control, cell division, chromosome partitioning ;; Inorganic ion transport and metabolism ;; Cell wall/membrane/envelope biogenesis	Molecular Function: copper ion binding (GO:0005507);; Molecular Function: GTP binding (GO:0005525);; Cellular Component: intracellular (GO:0005622);; Biological Process: small GTPase mediated signal transduction (GO:0007264);; Cellular Component: plant-type cell wall (GO:0009505);; Cellular Component: plasmodesma (GO:0009506);; Molecular Function: oxidoreductase activity, oxidizing metal ions (GO…	--	--	[Q]	Secondary metabolites biosynthesis, transport and catabolism	Multicopper oxidase;; Multicopper oxidase;; Multicopper oxidase	Monocopper oxidase-like protein SKS2 OS=Arabidopsis thaliana OX=3702 GN=SKS2 PE=1 SV=1	Q	Secondary metabolites biosynthesis, transport and catabolism	hypothetical protein POPTR_0008s03200g [Populus trichocarpa]
ptc-miR396d	UUCCACAGCUUUCUUGAACUU	21	gene-POPTR_008G130400	SULTR3;3	Inorganic ion transport and metabolism	Cellular Component: integral component of plasma membrane (GO:0005887);; Molecular Function: secondary active sulfate transmembrane transporter activity (GO:0008271);; Biological Process: sulfate transmembrane transport (GO:1902358);;	K17471|0|pop:POPTR_0008s12940g|K17471 sulfate transporter 3 | (RefSeq) POPTRDRAFT_803607; hypothetical protein	--	[P]	Inorganic ion transport and metabolism	Sulfate permease family;; STAS domain	Probable sulfate transporter 3.3 OS=Arabidopsis thaliana OX=3702 GN=SULTR3;3 PE=2 SV=2	P	Inorganic ion transport and metabolism	hypothetical protein POPTR_0008s12940g [Populus trichocarpa]
ptc-miR396d	UUCCACAGCUUUCUUGAACUU	21	gene-POPTR_008G147100	CSTF64	--	Molecular Function: nucleotide binding (GO:0000166);; Molecular Function: nucleic acid binding (GO:0003676);; Biological Process: mRNA processing (GO:0006397);; Cellular Component: integral component of membrane (GO:0016021);;	K12822|0|pop:POPTR_0008s14630g|K12822 RNA-binding protein 25 | (RefSeq) hypothetical protein	Spliceosome (ko03040)	[A]	RNA processing and modification	PWI domain;; RNA recognition motif. (a.k.a. RRM, RBD, or RNP domain)	Cleavage stimulating factor 64 OS=Arabidopsis thaliana OX=3702 GN=CSTF64 PE=1 SV=1	S	Function unknown	hypothetical protein POPTR_008G147100v3 [Populus trichocarpa]
ptc-miR396d	UUCCACAGCUUUCUUGAACUU	21	gene-POPTR_009G049400	CHLD	Coenzyme transport and metabolism	Molecular Function: ATP binding (GO:0005524);; Cellular Component: chloroplast thylakoid (GO:0009534);; Cellular Component: chloroplast stroma (GO:0009570);; Biological Process: photosynthesis (GO:0015979);; Biological Process: chlorophyll biosynthetic process (GO:0015995);; Molecular Function: magnesium chelatase activity (GO:0016851);;	K03404|0|pop:POPTR_0009s05400g|K03404 magnesium chelatase subunit D [EC:6.6.1.1] | (RefSeq) POPTRDRAFT_1088048; Mg-chelatase subunit D family protein	Porphyrin and chlorophyll metabolism (ko00860)	--	--	von Willebrand factor type A domain;; Magnesium chelatase, subunit ChlI;; von Willebrand factor type A domain;; Sigma-54 interaction domain;; AAA domain (dynein-related subfamily)	Magnesium-chelatase subunit ChlD, chloroplastic OS=Oryza sativa subsp. japonica OX=39947 GN=CHLD PE=1 SV=1	H	Coenzyme transport and metabolism	hypothetical protein POPTR_009G049400v3 [Populus trichocarpa]
ptc-miR396d	UUCCACAGCUUUCUUGAACUU	21	gene-POPTR_010G025900		Translation, ribosomal structure and biogenesis	Molecular Function: structural constituent of ribosome (GO:0003735);; Cellular Component: mitochondrial large ribosomal subunit (GO:0005762);; Biological Process: translation (GO:0006412);; Cellular Component: integral component of membrane (GO:0016021);;	K02913|1.57825e-30|pop:POPTR_0010s02680g|K02913 large subunit ribosomal protein L33 | (RefSeq) POPTRDRAFT_565708; ribosomal protein L33	Ribosome (ko03010)	[J]	Translation, ribosomal structure and biogenesis	Ribosomal protein L33	--	J	Translation, ribosomal structure and biogenesis	ribosomal protein L33 [Populus trichocarpa]
ptc-miR396d	UUCCACAGCUUUCUUGAACUU	21	gene-POPTR_010G040600	ULP1D	--	--	K16287|0|jcu:105644575|K16287 ubiquitin-like-specific protease 1C/D [EC:3.4.22.68] | (RefSeq) ubiquitin-like-specific protease 1D	--	[O]	Posttranslational modification, protein turnover, chaperones	Ulp1 protease family, C-terminal catalytic domain	Ubiquitin-like-specific protease 1D OS=Arabidopsis thaliana OX=3702 GN=ULP1D PE=1 SV=1	O	Posttranslational modification, protein turnover, chaperones	hypothetical protein POPTR_010G040600v3 [Populus trichocarpa]
ptc-miR396d	UUCCACAGCUUUCUUGAACUU	21	gene-POPTR_010G052600		--	Cellular Component: integral component of membrane (GO:0016021);;	--	--	--	--	--	--	S	Function unknown	hypothetical protein POPTR_010G052600v3 [Populus trichocarpa]
ptc-miR396d	UUCCACAGCUUUCUUGAACUU	21	gene-POPTR_010G053400	HSP21	Posttranslational modification, protein turnover, chaperones	--	K13993|6.47542e-153|pop:POPTR_0010s06320g|K13993 HSP20 family protein | (RefSeq) POPTRDRAFT_769024; hypothetical protein	Protein processing in endoplasmic reticulum (ko04141)	[O]	Posttranslational modification, protein turnover, chaperones	Hsp20/alpha crystallin family	Heat shock protein 21, chloroplastic OS=Arabidopsis thaliana OX=3702 GN=HSP21 PE=1 SV=1	O	Posttranslational modification, protein turnover, chaperones	hypothetical protein POPTR_0010s06320g [Populus trichocarpa]
ptc-miR396d	UUCCACAGCUUUCUUGAACUU	21	gene-POPTR_010G096500	THRRS	Translation, ribosomal structure and biogenesis	Molecular Function: RNA binding (GO:0003723);; Molecular Function: threonine-tRNA ligase activity (GO:0004829);; Molecular Function: ATP binding (GO:0005524);; Cellular Component: cytoplasm (GO:0005737);; Biological Process: threonyl-tRNA aminoacylation (GO:0006435);;	K01868|0|pop:POPTR_0010s10660g|K01868 threonyl-tRNA synthetase [EC:6.1.1.3] | (RefSeq) Threonyl-tRNA synthetase family protein	Aminoacyl-tRNA biosynthesis (ko00970)	[J]	Translation, ribosomal structure and biogenesis	tRNA synthetase class II core domain (G, H, P, S and T);; Anticodon binding domain;; Threonyl and Alanyl tRNA synthetase second additional domain	Threonine--tRNA ligase, mitochondrial 1 OS=Arabidopsis thaliana OX=3702 GN=THRRS PE=1 SV=3	J	Translation, ribosomal structure and biogenesis	hypothetical protein POPTR_010G096500v3 [Populus trichocarpa]
ptc-miR396d	UUCCACAGCUUUCUUGAACUU	21	gene-POPTR_010G123300		--	Biological Process: response to stress (GO:0006950);;	--	--	--	--	Universal stress protein family	--	T	Signal transduction mechanisms	hypothetical protein POPTR_010G123300v3 [Populus trichocarpa]
ptc-miR396d	UUCCACAGCUUUCUUGAACUU	21	gene-POPTR_010G125200	HMT1	Amino acid transport and metabolism	Molecular Function: S-adenosylmethionine-homocysteine S-methyltransferase activity (GO:0008898);; Biological Process: methionine biosynthetic process (GO:0009086);; Biological Process: methylation (GO:0032259);;	K00547|0|pop:POPTR_0010s13500g|K00547 homocysteine S-methyltransferase [EC:2.1.1.10] | (RefSeq) POPTRDRAFT_822134; homocysteine S-methyltransferase 1 family protein	Cysteine and methionine metabolism (ko00270)	[E]	Amino acid transport and metabolism	Homocysteine S-methyltransferase	Homocysteine S-methyltransferase 1 OS=Brassica oleracea var. italica OX=36774 GN=HMT1 PE=1 SV=1	E	Amino acid transport and metabolism	PREDICTED: homocysteine S-methyltransferase 1 [Populus euphratica]
ptc-miR396d	UUCCACAGCUUUCUUGAACUU	21	gene-POPTR_010G222200		--	Molecular Function: protein disulfide isomerase activity (GO:0003756);; Cellular Component: endoplasmic reticulum (GO:0005783);; Biological Process: protein folding (GO:0006457);; Biological Process: response to endoplasmic reticulum stress (GO:0034976);; Biological Process: cell redox homeostasis (GO:0045454);;	--	--	--	--	--	--	S	Function unknown	hypothetical protein POPTR_0010s22900g [Populus trichocarpa]
ptc-miR396d	UUCCACAGCUUUCUUGAACUU	21	gene-POPTR_011G025800	XTH8	Carbohydrate transport and metabolism	Molecular Function: hydrolase activity, hydrolyzing O-glycosyl compounds (GO:0004553);; Cellular Component: cell wall (GO:0005618);; Biological Process: xyloglucan metabolic process (GO:0010411);; Molecular Function: xyloglucan:xyloglucosyl transferase activity (GO:0016762);; Biological Process: cell wall biogenesis (GO:0042546);; Cellular Component: apoplast (GO:0048046);; Biological Process: ce…	K08235|2.25855e-139|rcu:8267447|K08235 xyloglucan:xyloglucosyl transferase [EC:2.4.1.207] | (RefSeq) probable xyloglucan endotransglucosylase/hydrolase protein 8	--	--	--	Glycosyl hydrolases family 16;; Xyloglucan endo-transglycosylase (XET) C-terminus	Probable xyloglucan endotransglucosylase/hydrolase protein 8 OS=Arabidopsis thaliana OX=3702 GN=XTH8 PE=2 SV=2	G	Carbohydrate transport and metabolism	hypothetical protein POPTR_011G025800v3 [Populus trichocarpa]
ptc-miR396d	UUCCACAGCUUUCUUGAACUU	21	gene-POPTR_011G045500	At5g23430	General function prediction only	Cellular Component: microtubule (GO:0005874);; Molecular Function: microtubule binding (GO:0008017);; Cellular Component: katanin complex (GO:0008352);; Biological Process: microtubule severing (GO:0051013);;	K18643|0|pop:POPTR_0011s04530g|K18643 katanin p80 WD40 repeat-containing subunit B1 | (RefSeq) hypothetical protein	--	[D]	Cell cycle control, cell division, chromosome partitioning	con80 domain of Katanin;; WD domain, G-beta repeat;; Anaphase-promoting complex subunit 4 WD40 domain;; Eukaryotic translation initiation factor eIF2A	Katanin p80 WD40 repeat-containing subunit B1 homolog OS=Arabidopsis thaliana OX=3702 GN=At5g23430 PE=2 SV=3	S	Function unknown	hypothetical protein POPTR_0011s04530g [Populus trichocarpa]
ptc-miR396d	UUCCACAGCUUUCUUGAACUU	21	gene-POPTR_011G105500	MSL6	--	Cellular Component: plasma membrane (GO:0005886);; Biological Process: anion transport (GO:0006820);; Molecular Function: mechanically-gated ion channel activity (GO:0008381);; Cellular Component: integral component of membrane (GO:0016021);; Biological Process: ion transmembrane transport (GO:0034220);;	--	--	[M]	Cell wall/membrane/envelope biogenesis	Mechanosensitive ion channel	Mechanosensitive ion channel protein 6 OS=Arabidopsis thaliana OX=3702 GN=MSL6 PE=1 SV=1	M	Cell wall/membrane/envelope biogenesis	hypothetical protein POPTR_011G105500v3 [Populus trichocarpa]
ptc-miR396d	UUCCACAGCUUUCUUGAACUU	21	gene-POPTR_012G004400	ATG13A	--	Biological Process: autophagy (GO:0006914);; Cellular Component: ATG1/ULK1 kinase complex (GO:1990316);;	K08331|0|pop:POPTR_0012s00380g|K08331 autophagy-related protein 13 | (RefSeq) POPTRDRAFT_661647; hypothetical protein	Regulation of autophagy (ko04140)	[U]	Intracellular trafficking, secretion, and vesicular transport	Autophagy-related protein 13	Autophagy-related protein 13a OS=Arabidopsis thaliana OX=3702 GN=ATG13A PE=1 SV=1	U	Intracellular trafficking, secretion, and vesicular transport	hypothetical protein POPTR_0012s00300g [Populus trichocarpa]
ptc-miR396d	UUCCACAGCUUUCUUGAACUU	21	gene-POPTR_012G015400	EMB1796	--	Molecular Function: ATP binding (GO:0005524);; Cellular Component: mitochondrion (GO:0005739);; Cellular Component: chloroplast (GO:0009507);; Biological Process: embryo development ending in seed dormancy (GO:0009793);;	--	--	[R]	General function prediction only	PPR repeat family;; PPR repeat;; PPR repeat;; Pentatricopeptide repeat domain;; Pentacotripeptide-repeat region of PRORP;; Tetratricopeptide repeat	Pentatricopeptide repeat-containing protein At3g49240, mitochondrial OS=Arabidopsis thaliana OX=3702 GN=EMB1796 PE=1 SV=1	S	Function unknown	hypothetical protein POPTR_012G015400v3 [Populus trichocarpa]
ptc-miR396d	UUCCACAGCUUUCUUGAACUU	21	gene-POPTR_012G022600	GRF7	--	Molecular Function: ATP binding (GO:0005524);; Cellular Component: nucleus (GO:0005634);; Biological Process: regulation of transcription, DNA-templated (GO:0006355);; Biological Process: developmental process (GO:0032502);;	--	--	--	--	WRC;; QLQ	Growth-regulating factor 7 OS=Arabidopsis thaliana OX=3702 GN=GRF7 PE=2 SV=1	K	Transcription	hypothetical protein POPTR_012G022600v3 [Populus trichocarpa]
ptc-miR396d	UUCCACAGCUUUCUUGAACUU	21	gene-POPTR_012G024400	EMB2024	Carbohydrate transport and metabolism	Biological Process: carbohydrate metabolic process (GO:0005975);; Biological Process: pentose-phosphate shunt (GO:0006098);; Molecular Function: isomerase activity (GO:0016853);; Molecular Function: 6-phosphogluconolactonase activity (GO:0017057);;	K01057|0|pop:POPTR_0012s03150g|K01057 6-phosphogluconolactonase [EC:3.1.1.31] | (RefSeq) POPTRDRAFT_772510; hypothetical protein	Carbon metabolism (ko01200)	[G]	Carbohydrate transport and metabolism	Glucosamine-6-phosphate isomerases/6-phosphogluconolactonase	Probable 6-phosphogluconolactonase 5, chloroplastic OS=Arabidopsis thaliana OX=3702 GN=EMB2024 PE=2 SV=1	G	Carbohydrate transport and metabolism	hypothetical protein POPTR_0012s03150g [Populus trichocarpa]
ptc-miR396d	UUCCACAGCUUUCUUGAACUU	21	gene-POPTR_012G058100	TGH	--	Cellular Component: nucleus (GO:0005634);; Biological Process: mRNA processing (GO:0006397);; Biological Process: phloem or xylem histogenesis (GO:0010087);; Biological Process: production of siRNA involved in RNA interference (GO:0030422);; Biological Process: production of miRNAs involved in gene silencing by miRNA (GO:0035196);; Molecular Function: primary miRNA binding (GO:0070878);; Molecula…	K13123|0|pop:POPTR_0012s05460g|K13123 G patch domain-containing protein 1 | (RefSeq) POPTRDRAFT_569839; hypothetical protein	--	[A]	RNA processing and modification	Protein of unknown function (DUF1604);; Surp module	G patch domain-containing protein TGH OS=Arabidopsis thaliana OX=3702 GN=TGH PE=1 SV=1	S	Function unknown	hypothetical protein POPTR_0012s05460g [Populus trichocarpa]
ptc-miR396d	UUCCACAGCUUUCUUGAACUU	21	gene-POPTR_012G103200	SWEET10	--	Cellular Component: plasma membrane (GO:0005886);; Cellular Component: integral component of membrane (GO:0016021);; Biological Process: carbohydrate transmembrane transport (GO:0034219);; Molecular Function: sugar transmembrane transporter activity (GO:0051119);;	K15382|2.52102e-138|pop:POPTR_0012s10500g|K15382 solute carrier family 50 (sugar transporter) | (RefSeq) hypothetical protein	--	[R]	General function prediction only	Sugar efflux transporter for intercellular exchange	Bidirectional sugar transporter SWEET10 OS=Arabidopsis thaliana OX=3702 GN=SWEET10 PE=1 SV=1	U	Intracellular trafficking, secretion, and vesicular transport	hypothetical protein POPTR_012G103200v3, partial [Populus trichocarpa]
ptc-miR396d	UUCCACAGCUUUCUUGAACUU	21	gene-POPTR_013G013600	RPL18B	Translation, ribosomal structure and biogenesis	Molecular Function: RNA binding (GO:0003723);; Molecular Function: structural constituent of ribosome (GO:0003735);; Biological Process: translation (GO:0006412);; Cellular Component: cytosolic large ribosomal subunit (GO:0022625);;	K02883|1.02438e-129|pop:POPTR_0013s01520g|K02883 large subunit ribosomal protein L18e | (RefSeq) POPTRDRAFT_570762; 60S ribosomal protein L18	Ribosome (ko03010)	[J]	Translation, ribosomal structure and biogenesis	Ribosomal protein 60S L18 and 50S L18e;; Ribosomal proteins 50S-L15, 50S-L18e, 60S-L27A	60S ribosomal protein L18-2 OS=Arabidopsis thaliana OX=3702 GN=RPL18B PE=1 SV=2	J	Translation, ribosomal structure and biogenesis	60S ribosomal protein L18 [Populus trichocarpa]
ptc-miR396d	UUCCACAGCUUUCUUGAACUU	21	gene-POPTR_013G023100	MIRO1	--	Molecular Function: GTPase activity (GO:0003924);; Molecular Function: calcium ion binding (GO:0005509);; Molecular Function: GTP binding (GO:0005525);; Biological Process: mitochondrion organization (GO:0007005);; Biological Process: small GTPase mediated signal transduction (GO:0007264);; Cellular Component: integral component of mitochondrial outer membrane (GO:0031307);;	K07870|0|pop:POPTR_0013s02400g|K07870 Ras homolog gene family, member T1 | (RefSeq) POPTRDRAFT_823621; hypothetical protein	--	[V]	Defense mechanisms	EF hand associated;; Ras family;; EF hand associated;; Ras of Complex, Roc, domain of DAPkinase;; 50S ribosome-binding GTPase;; EF-hand domain;; Dynamin family	Mitochondrial Rho GTPase 1 OS=Arabidopsis thaliana OX=3702 GN=MIRO1 PE=1 SV=1	S	Function unknown	hypothetical protein POPTR_013G023100v3 [Populus trichocarpa]
ptc-miR396d	UUCCACAGCUUUCUUGAACUU	21	gene-POPTR_013G077500	GRF3	--	Molecular Function: ATP binding (GO:0005524);; Cellular Component: nucleus (GO:0005634);; Biological Process: regulation of transcription, DNA-templated (GO:0006355);; Biological Process: developmental process (GO:0032502);;	--	--	--	--	WRC;; QLQ	Growth-regulating factor 3 OS=Oryza sativa subsp. japonica OX=39947 GN=GRF3 PE=3 SV=2	K	Transcription	hypothetical protein POPTR_0013s07500g [Populus trichocarpa]
ptc-miR396d	UUCCACAGCUUUCUUGAACUU	21	gene-POPTR_013G101900	At1g22800	Coenzyme transport and metabolism	Molecular Function: methyltransferase activity (GO:0008168);; Biological Process: methylation (GO:0032259);;	K18162|1.02562e-179|pop:POPTR_0013s10270g|K18162 NADH dehydrogenase [ubiquinone] 1 alpha subcomplex assembly factor 5 [EC:2.1.1.-] | (RefSeq) hypothetical protein	--	[R]	General function prediction only	Methyltransferase domain;; Methyltransferase domain;; ubiE/COQ5 methyltransferase family;; Reverse transcriptase (RNA-dependent DNA polymerase)	Putative methyltransferase At1g22800, mitochondrial OS=Arabidopsis thaliana OX=3702 GN=At1g22800 PE=1 SV=2	Q	Secondary metabolites biosynthesis, transport and catabolism	hypothetical protein POPTR_013G101900v3, partial [Populus trichocarpa]
ptc-miR396d	UUCCACAGCUUUCUUGAACUU	21	gene-POPTR_013G109600	FANCM	Replication, recombination and repair	Molecular Function: DNA binding (GO:0003677);; Molecular Function: ATP binding (GO:0005524);; Molecular Function: hydrolase activity (GO:0016787);;	K10896|0|pop:POPTR_0013s11390g|K10896 fanconi anemia group M protein | (RefSeq) hypothetical protein	--	[R]	General function prediction only	Helicase conserved C-terminal domain;; Type III restriction enzyme, res subunit;; DEAD/DEAH box helicase	DEAD-box ATP-dependent RNA helicase FANCM OS=Arabidopsis thaliana OX=3702 GN=FANCM PE=2 SV=1	L	Replication, recombination and repair	hypothetical protein POPTR_013G109600v3 [Populus trichocarpa]
ptc-miR396d	UUCCACAGCUUUCUUGAACUU	21	gene-POPTR_014G004800	DG1	--	--	--	--	[R]	General function prediction only	--	Pentatricopeptide repeat-containing protein At5g67570, chloroplastic OS=Arabidopsis thaliana OX=3702 GN=DG1 PE=1 SV=2	--	--	hypothetical protein POPTR_0014s01020g [Populus trichocarpa]
ptc-miR396d	UUCCACAGCUUUCUUGAACUU	21	gene-POPTR_014G007200	GRF1	--	Molecular Function: ATP binding (GO:0005524);; Cellular Component: nucleus (GO:0005634);; Biological Process: regulation of transcription, DNA-templated (GO:0006355);; Biological Process: developmental process (GO:0032502);;	--	--	--	--	WRC;; QLQ	Growth-regulating factor 1 OS=Arabidopsis thaliana OX=3702 GN=GRF1 PE=1 SV=1	K	Transcription	hypothetical protein POPTR_0014s00780g [Populus trichocarpa]
ptc-miR396d	UUCCACAGCUUUCUUGAACUU	21	gene-POPTR_014G012800	GRF6	--	Molecular Function: ATP binding (GO:0005524);; Cellular Component: nucleus (GO:0005634);; Biological Process: regulation of transcription, DNA-templated (GO:0006355);; Biological Process: developmental process (GO:0032502);;	--	--	--	--	WRC;; QLQ	Growth-regulating factor 6 OS=Oryza sativa subsp. japonica OX=39947 GN=GRF6 PE=2 SV=2	K	Transcription	hypothetical protein POPTR_014G012800v3 [Populus trichocarpa]
ptc-miR396d	UUCCACAGCUUUCUUGAACUU	21	gene-POPTR_014G023200	DCL	--	--	--	--	--	--	Protein of unknown function (DUF3223)	Protein DCL, chloroplastic OS=Solanum lycopersicum OX=4081 GN=DCL PE=2 SV=1	S	Function unknown	hypothetical protein POPTR_014G023200v3 [Populus trichocarpa]
ptc-miR396d	UUCCACAGCUUUCUUGAACUU	21	gene-POPTR_014G024100	RD21B	Posttranslational modification, protein turnover, chaperones	Molecular Function: cysteine-type endopeptidase activity (GO:0004197);; Cellular Component: extracellular space (GO:0005615);; Cellular Component: lysosome (GO:0005764);; Molecular Function: 2-alkenal reductase [NAD(P)] activity (GO:0032440);; Biological Process: proteolysis involved in cellular protein catabolic process (GO:0051603);; Biological Process: oxidation-reduction process (GO:0055114);;	--	--	[O]	Posttranslational modification, protein turnover, chaperones	Papain family cysteine protease;; Cathepsin propeptide inhibitor domain (I29);; Granulin	Probable cysteine protease RD21B OS=Arabidopsis thaliana OX=3702 GN=RD21B PE=1 SV=1	O	Posttranslational modification, protein turnover, chaperones	cysteine proteinase [Populus trichocarpa]
ptc-miR396d	UUCCACAGCUUUCUUGAACUU	21	gene-POPTR_014G071800	GRF9	--	Molecular Function: ATP binding (GO:0005524);; Cellular Component: nucleus (GO:0005634);; Biological Process: regulation of transcription, DNA-templated (GO:0006355);; Biological Process: developmental process (GO:0032502);;	--	--	--	--	WRC;; QLQ	Growth-regulating factor 9 OS=Arabidopsis thaliana OX=3702 GN=GRF9 PE=1 SV=1	K	Transcription	hypothetical protein POPTR_014G071800v3 [Populus trichocarpa]
ptc-miR396d	UUCCACAGCUUUCUUGAACUU	21	gene-POPTR_014G077100	PFC1	Translation, ribosomal structure and biogenesis	Molecular Function: rRNA (adenine-N6,N6-)-dimethyltransferase activity (GO:0000179);; Cellular Component: cytoplasm (GO:0005737);; Biological Process: response to cold (GO:0009409);; Biological Process: rRNA methylation (GO:0031167);;	--	--	[A]	RNA processing and modification	Ribosomal RNA adenine dimethylase	Ribosomal RNA small subunit methyltransferase, chloroplastic OS=Arabidopsis thaliana OX=3702 GN=PFC1 PE=2 SV=1	J	Translation, ribosomal structure and biogenesis	hypothetical protein POPTR_014G077100v3 [Populus trichocarpa]
ptc-miR396d	UUCCACAGCUUUCUUGAACUU	21	gene-POPTR_014G116600	PCMP-H75	--	Molecular Function: zinc ion binding (GO:0008270);;	--	--	[R]	General function prediction only	DYW family of nucleic acid deaminases;; PPR repeat family;; PPR repeat;; PPR repeat	Pentatricopeptide repeat-containing protein At2g25580 OS=Arabidopsis thaliana OX=3702 GN=PCMP-H75 PE=2 SV=2	S	Function unknown	hypothetical protein POPTR_014G116600v3 [Populus trichocarpa]
ptc-miR396d	UUCCACAGCUUUCUUGAACUU	21	gene-POPTR_014G161200		--	Molecular Function: calcium ion binding (GO:0005509);;	--	--	--	--	EF-hand domain pair;; EF hand;; EF-hand domain;; EF hand;; EF-hand domain pair	--	S	Function unknown	hypothetical protein POPTR_0014s15950g [Populus trichocarpa]
ptc-miR396d	UUCCACAGCUUUCUUGAACUU	21	gene-POPTR_014G185300		--	--	--	--	--	--	DUF761-associated sequence motif	--	S	Function unknown	hypothetical protein POPTR_014G185300v3 [Populus trichocarpa]
ptc-miR396d	UUCCACAGCUUUCUUGAACUU	21	gene-POPTR_015G006200	GRF7	--	Molecular Function: ATP binding (GO:0005524);; Cellular Component: nucleus (GO:0005634);; Biological Process: regulation of transcription, DNA-templated (GO:0006355);; Biological Process: developmental process (GO:0032502);;	--	--	--	--	WRC;; QLQ	Growth-regulating factor 7 OS=Arabidopsis thaliana OX=3702 GN=GRF7 PE=2 SV=1	K	Transcription	hypothetical protein POPTR_0015s00860g [Populus trichocarpa]
ptc-miR396d	UUCCACAGCUUUCUUGAACUU	21	gene-POPTR_015G017500		Amino acid transport and metabolism	Molecular Function: iron ion binding (GO:0005506);; Biological Process: glutamate biosynthetic process (GO:0006537);; Cellular Component: chloroplast stroma (GO:0009570);; Biological Process: response to cytokinin (GO:0009735);; Molecular Function: FMN binding (GO:0010181);; Molecular Function: glutamate synthase (NADH) activity (GO:0016040);; Biological Process: ammonia assimilation cycle (GO:00…	K00264|0|pop:POPTR_0015s01950g|K00264 glutamate synthase (NADPH/NADH) [EC:1.4.1.13 1.4.1.14] | (RefSeq) POPTRDRAFT_824538; NADH-dependent glutamate synthase family protein	Biosynthesis of amino acids (ko01230)	[E]	Amino acid transport and metabolism	Glutamine amidotransferases class-II;; Conserved region in glutamate synthase;; Glutamate synthase central domain;; GXGXG motif;; Pyridine nucleotide-disulphide oxidoreductase;; Dihydroprymidine dehydrogenase domain II, 4Fe-4S cluster;; NAD(P)-binding Rossmann-like domain;; Pyridine nucleotide-disulphide oxidoreductase;; Pyridine nucleotide-disulphide oxidoreductase;; Flavin containing amine oxid…	Glutamate synthase [NADH], amyloplastic OS=Medicago sativa OX=3879 PE=1 SV=1	E	Amino acid transport and metabolism	hypothetical protein POPTR_0015s01950g [Populus trichocarpa]
ptc-miR396d	UUCCACAGCUUUCUUGAACUU	21	gene-POPTR_015G099000	SAE1A	Coenzyme transport and metabolism	Cellular Component: nucleus (GO:0005634);; Cellular Component: cytosol (GO:0005829);; Biological Process: regulation of mitotic cell cycle (GO:0007346);; Biological Process: protein sumoylation (GO:0016925);; Molecular Function: SUMO activating enzyme activity (GO:0019948);;	K10684|0|pop:POPTR_0015s11110g|K10684 ubiquitin-like 1-activating enzyme E1 A [EC:6.2.1.45] | (RefSeq) POPTRDRAFT_575384; hypothetical protein	Ubiquitin mediated proteolysis (ko04120)	[O]	Posttranslational modification, protein turnover, chaperones	ThiF family	SUMO-activating enzyme subunit 1A OS=Arabidopsis thaliana OX=3702 GN=SAE1A PE=1 SV=1	H	Coenzyme transport and metabolism	hypothetical protein POPTR_015G099000v3 [Populus trichocarpa]
ptc-miR396d	UUCCACAGCUUUCUUGAACUU	21	gene-POPTR_015G117401	AGO2	--	Molecular Function: nucleic acid binding (GO:0003676);;	K11593|0|pop:POPTR_0015s15780g|K11593 eukaryotic translation initiation factor 2C | (RefSeq) hypothetical protein	--	[J]	Translation, ribosomal structure and biogenesis	N-terminal domain of argonaute;; PAZ domain;; Argonaute linker 1 domain	Protein argonaute 2 OS=Arabidopsis thaliana OX=3702 GN=AGO2 PE=1 SV=1	J	Translation, ribosomal structure and biogenesis	PREDICTED: protein argonaute 2-like [Populus euphratica]
ptc-miR396d	UUCCACAGCUUUCUUGAACUU	21	gene-POPTR_016G012900	UPL5	--	Molecular Function: ubiquitin-protein transferase activity (GO:0004842);; Cellular Component: nucleus (GO:0005634);; Cellular Component: cytoplasm (GO:0005737);; Molecular Function: ligase activity (GO:0016874);; Biological Process: protein ubiquitination involved in ubiquitin-dependent protein catabolic process (GO:0042787);;	K10591|0|pop:POPTR_0016s01430g|K10591 E3 ubiquitin-protein ligase NEDD4 [EC:2.3.2.26] | (RefSeq) POPTRDRAFT_667133; hypothetical protein	Endocytosis (ko04144)	[O]	Posttranslational modification, protein turnover, chaperones	HECT-domain (ubiquitin-transferase)	E3 ubiquitin-protein ligase UPL5 OS=Arabidopsis thaliana OX=3702 GN=UPL5 PE=1 SV=1	O	Posttranslational modification, protein turnover, chaperones	hypothetical protein POPTR_016G012900v3 [Populus trichocarpa]
ptc-miR396d	UUCCACAGCUUUCUUGAACUU	21	gene-POPTR_016G019700		--	Biological Process: proteolysis (GO:0006508);; Molecular Function: peptidase activity (GO:0008233);;	--	--	[TO]	--	OTU-like cysteine protease	--	O	Posttranslational modification, protein turnover, chaperones	hypothetical protein POPTR_0016s02090g [Populus trichocarpa]
ptc-miR396d	UUCCACAGCUUUCUUGAACUU	21	gene-POPTR_016G035900	At2g26850	--	--	--	--	--	--	F-box domain	F-box protein At2g26850 OS=Arabidopsis thaliana OX=3702 GN=At2g26850 PE=2 SV=1	S	Function unknown	hypothetical protein POPTR_016G035900v3 [Populus trichocarpa]
ptc-miR396d	UUCCACAGCUUUCUUGAACUU	21	gene-POPTR_016G047700		--	--	--	--	--	--	--	--	S	Function unknown	hypothetical protein POPTR_0016s04810g [Populus trichocarpa]
ptc-miR396d	UUCCACAGCUUUCUUGAACUU	21	gene-POPTR_016G112500	Os08g0237200	--	Molecular Function: mannose-1-phosphate guanylyltransferase activity (GO:0004475);; Molecular Function: mannose-1-phosphate guanylyltransferase (GDP) activity (GO:0008928);; Biological Process: biosynthetic process (GO:0009058);;	--	--	[M]	Cell wall/membrane/envelope biogenesis	--	Probable mannose-1-phosphate guanylyltransferase 3 OS=Oryza sativa subsp. japonica OX=39947 GN=Os08g0237200 PE=2 SV=1	--	--	hypothetical protein POPTR_0016s12000g [Populus trichocarpa]
ptc-miR396d	UUCCACAGCUUUCUUGAACUU	21	gene-POPTR_016G121800	At1g14600	--	Molecular Function: DNA binding (GO:0003677);; Cellular Component: nucleus (GO:0005634);; Biological Process: regulation of transcription, DNA-templated (GO:0006355);;	--	--	--	--	Myb-like DNA-binding domain	Putative Myb family transcription factor At1g14600 OS=Arabidopsis thaliana OX=3702 GN=At1g14600 PE=2 SV=2	K	Transcription	hypothetical protein POPTR_016G121800v3 [Populus trichocarpa]
ptc-miR396d	UUCCACAGCUUUCUUGAACUU	21	gene-POPTR_017G000800	MLO1	--	Molecular Function: calmodulin binding (GO:0005516);; Cellular Component: plasma membrane (GO:0005886);; Biological Process: defense response (GO:0006952);; Biological Process: response to biotic stimulus (GO:0009607);; Cellular Component: integral component of membrane (GO:0016021);;	K08472|0|pop:POPTR_0017s00470g|K08472 mlo protein | (RefSeq) hypothetical protein	--	--	--	Mlo family	MLO-like protein 1 OS=Arabidopsis thaliana OX=3702 GN=MLO1 PE=1 SV=1	D	Cell cycle control, cell division, chromosome partitioning	hypothetical protein POPTR_017G000800v3 [Populus trichocarpa]
ptc-miR396d	UUCCACAGCUUUCUUGAACUU	21	gene-POPTR_017G000900	MLO1	--	Molecular Function: calmodulin binding (GO:0005516);; Cellular Component: plasma membrane (GO:0005886);; Biological Process: defense response (GO:0006952);; Biological Process: response to biotic stimulus (GO:0009607);; Cellular Component: integral component of membrane (GO:0016021);;	K08472|0|pop:POPTR_0017s00470g|K08472 mlo protein | (RefSeq) hypothetical protein	--	--	--	Mlo family;; Mlo family	MLO-like protein 1 OS=Arabidopsis thaliana OX=3702 GN=MLO1 PE=1 SV=1	D	Cell cycle control, cell division, chromosome partitioning	hypothetical protein POPTR_017G000900v3 [Populus trichocarpa]
ptc-miR396d	UUCCACAGCUUUCUUGAACUU	21	gene-POPTR_017G050700	PSKR	Transcription	Biological Process: metabolic process (GO:0008152);; Cellular Component: integral component of membrane (GO:0016021);; Molecular Function: oxidoreductase activity (GO:0016491);; Molecular Function: hydrolase activity (GO:0016787);;	--	--	--	--	Leucine rich repeat;; Leucine Rich repeats (2 copies);; Leucine Rich Repeat;; Leucine rich repeat N-terminal domain	Phytosulfokine receptor 1 OS=Daucus carota OX=4039 GN=PSKR PE=1 SV=1	S	Function unknown	hypothetical protein POPTR_0017s07750g [Populus trichocarpa]
ptc-miR396d	UUCCACAGCUUUCUUGAACUU	21	gene-POPTR_017G084000	FTSH6	Posttranslational modification, protein turnover, chaperones	Molecular Function: ATP-dependent peptidase activity (GO:0004176);; Molecular Function: metalloendopeptidase activity (GO:0004222);; Molecular Function: ATP binding (GO:0005524);; Cellular Component: mitochondrion (GO:0005739);; Biological Process: proteolysis (GO:0006508);; Molecular Function: zinc ion binding (GO:0008270);; Molecular Function: microtubule-severing ATPase activity (GO:0008568);;…	K03798|0|pop:POPTR_0017s12030g|K03798 cell division protease FtsH [EC:3.4.24.-] | (RefSeq) POPTRDRAFT_778519; FtsH protease family protein	--	[O]	Posttranslational modification, protein turnover, chaperones	Peptidase family M41;; ATPase family associated with various cellular activities (AAA);; AAA domain (dynein-related subfamily);; TIP49 C-terminus;; Holliday junction DNA helicase ruvB N-terminus	ATP-dependent zinc metalloprotease FTSH 6, chloroplastic OS=Arabidopsis thaliana OX=3702 GN=FTSH6 PE=2 SV=1	O	Posttranslational modification, protein turnover, chaperones	FtsH protease family protein [Populus trichocarpa]
ptc-miR396d	UUCCACAGCUUUCUUGAACUU	21	gene-POPTR_017G138300	GS1	--	Biological Process: formation of translation preinitiation complex (GO:0001731);; Biological Process: cytoplasmic translation (GO:0002181);; Molecular Function: translation initiation factor activity (GO:0003743);; Cellular Component: eukaryotic translation initiation factor 3 complex (GO:0005852);; Biological Process: regulation of translational initiation (GO:0006446);; Cellular Component: euka…	K03245|5.16153e-95|pop:POPTR_0017s02160g|K03245 translation initiation factor 3 subunit J | (RefSeq) hypothetical protein	RNA transport (ko03013)	[J]	Translation, ribosomal structure and biogenesis	Translation initiation factor eIF3 subunit	Glutamine synthetase nodule isozyme OS=Pisum sativum OX=3888 GN=GS1 PE=2 SV=2	J	Translation, ribosomal structure and biogenesis	hypothetical protein POPTR_017G138300v3 [Populus trichocarpa]
ptc-miR396d	UUCCACAGCUUUCUUGAACUU	21	gene-POPTR_018G027550		--	--	--	--	--	--	--	--	L	Replication, recombination and repair	PREDICTED: uncharacterized protein LOC104901272 [Beta vulgaris subsp. vulgaris]
ptc-miR396d	UUCCACAGCUUUCUUGAACUU	21	gene-POPTR_018G065400	GRF4	--	Molecular Function: ATP binding (GO:0005524);; Cellular Component: nucleus (GO:0005634);; Biological Process: regulation of transcription, DNA-templated (GO:0006355);; Biological Process: developmental process (GO:0032502);;	--	--	--	--	WRC;; QLQ	Growth-regulating factor 4 OS=Oryza sativa subsp. japonica OX=39947 GN=GRF4 PE=2 SV=1	K	Transcription	hypothetical protein POPTR_018G065400v3 [Populus trichocarpa]
ptc-miR396d	UUCCACAGCUUUCUUGAACUU	21	gene-POPTR_018G113100	EDR2	--	Cellular Component: plasma membrane (GO:0005886);; Molecular Function: lipid binding (GO:0008289);;	--	--	--	--	Protein of unknown function (DUF1336);; START domain	Protein ENHANCED DISEASE RESISTANCE 2 OS=Arabidopsis thaliana OX=3702 GN=EDR2 PE=2 SV=1	S	Function unknown	hypothetical protein POPTR_018G113100v3 [Populus trichocarpa]
ptc-miR396d	UUCCACAGCUUUCUUGAACUU	21	gene-POPTR_018G127000		--	--	--	--	--	--	--	--	--	--	PREDICTED: uncharacterized protein LOC105121042 isoform X1 [Populus euphratica]
ptc-miR396d	UUCCACAGCUUUCUUGAACUU	21	gene-POPTR_019G019200	At1g08610	--	--	--	--	[R]	General function prediction only	PPR repeat family;; PPR repeat;; PPR repeat;; Pentatricopeptide repeat domain;; Pentacotripeptide-repeat region of PRORP	Pentatricopeptide repeat-containing protein At1g08610 OS=Arabidopsis thaliana OX=3702 GN=At1g08610 PE=2 SV=1	S	Function unknown	hypothetical protein POPTR_019G019200v3 [Populus trichocarpa]
ptc-miR396d	UUCCACAGCUUUCUUGAACUU	21	gene-POPTR_019G042300	GRF3	--	Molecular Function: ATP binding (GO:0005524);; Cellular Component: nucleus (GO:0005634);; Biological Process: regulation of transcription, DNA-templated (GO:0006355);; Biological Process: developmental process (GO:0032502);;	--	--	--	--	WRC;; QLQ	Growth-regulating factor 3 OS=Oryza sativa subsp. japonica OX=39947 GN=GRF3 PE=3 SV=2	K	Transcription	hypothetical protein POPTR_019G042300v3 [Populus trichocarpa]
ptc-miR396d	UUCCACAGCUUUCUUGAACUU	21	gene-POPTR_019G049400	EMB976	--	--	--	--	[R]	General function prediction only	PPR repeat family;; PPR repeat;; PPR repeat;; Pentatricopeptide repeat domain;; Pentacotripeptide-repeat region of PRORP;; Tetratricopeptide repeat;; Tetratricopeptide repeat;; Tetratricopeptide repeat	Pentatricopeptide repeat-containing protein At5g27270 OS=Arabidopsis thaliana OX=3702 GN=EMB976 PE=2 SV=2	S	Function unknown	hypothetical protein POPTR_019G049400v3 [Populus trichocarpa]
ptc-miR396d	UUCCACAGCUUUCUUGAACUU	21	gene-POPTR_019G061600	NET4A	--	Molecular Function: actin binding (GO:0003779);;	--	--	--	--	KIP1-like protein	Protein NETWORKED 4A OS=Arabidopsis thaliana OX=3702 GN=NET4A PE=2 SV=1	S	Function unknown	hypothetical protein POPTR_019G061600v3 [Populus trichocarpa]
ptc-miR396d	UUCCACAGCUUUCUUGAACUU	21	gene-POPTR_019G095000		--	--	--	--	--	--	--	--	--	--	hypothetical protein POPTR_0019s12460g [Populus trichocarpa]
ptc-miR396d	UUCCACAGCUUUCUUGAACUU	21	gene-POPTR_T028900	NET4A	Coenzyme transport and metabolism ;; Energy production and conversion	Molecular Function: squalene monooxygenase activity (GO:0004506);; Biological Process: tRNA processing (GO:0008033);; Biological Process: response to water deprivation (GO:0009414);; Cellular Component: integral component of membrane (GO:0016021);; Biological Process: sterol biosynthetic process (GO:0016126);; Molecular Function: flavin adenine dinucleotide binding (GO:0050660);; Biological Proce…	K00511|0|pop:POPTR_0019s03070g|K00511 squalene monooxygenase [EC:1.14.14.17] | (RefSeq) POPTRDRAFT_1107615, POPTRDRAFT_779996; hypothetical protein	Sesquiterpenoid and triterpenoid biosynthesis (ko00909)	[I]	Lipid transport and metabolism	Squalene epoxidase;; FAD binding domain;; FAD dependent oxidoreductase;; Glucose inhibited division protein A;; Thi4 family;; NAD(P)-binding Rossmann-like domain;; FAD binding domain	Squalene epoxidase 1 OS=Arabidopsis thaliana OX=3702 GN=SQE1 PE=1 SV=1	CH	--	hypothetical protein POPTR_T028900v3, partial [Populus trichocarpa]
ptc-miR396d	UUCCACAGCUUUCUUGAACUU	21	gene-POPTR_T071500	EMB976	--	--	--	--	[R]	General function prediction only	PPR repeat family;; PPR repeat;; PPR repeat;; Pentatricopeptide repeat domain;; Pentacotripeptide-repeat region of PRORP;; Tetratricopeptide repeat;; Tetratricopeptide repeat;; Tetratricopeptide repeat	Pentatricopeptide repeat-containing protein At5g27270 OS=Arabidopsis thaliana OX=3702 GN=EMB976 PE=2 SV=2	S	Function unknown	hypothetical protein POPTR_T071500v3 [Populus trichocarpa]
ptc-miR396d	UUCCACAGCUUUCUUGAACUU	21	gene-POPTR_T125700	SC35	Translation, ribosomal structure and biogenesis	Molecular Function: nucleotide binding (GO:0000166);; Molecular Function: RNA binding (GO:0003723);;	K12891|6.08162e-72|pop:POPTR_0003s01810g|K12891 splicing factor, arginine/serine-rich 2 | (RefSeq) hypothetical protein	Spliceosome (ko03040)	[A]	RNA processing and modification	RNA recognition motif. (a.k.a. RRM, RBD, or RNP domain)	Serine/arginine-rich splicing factor SC35 OS=Arabidopsis thaliana OX=3702 GN=SC35 PE=1 SV=1	A	RNA processing and modification	hypothetical protein POPTR_003G023800v3 [Populus trichocarpa]
(b) 25 predicted target genes for miRNA395c
miRNA ID	miRNA Seq	miRNA Length	Target gene	Target gene name	COG class annotation	GO annotation	KEGG annotation	KEGG pathway annotation	KOG class	KOG class annotation	Pfam annotation	Swissprot annotation	eggNOG class	eggNOG class annotation	nr annotation
ptc-miR395c	CUGAAGUGUUUGGGGGAACUC	21	gene-POPTR_001G215200	IQD1	--	--	--	--	--	--	IQ calmodulin-binding motif	Protein IQ-DOMAIN 1 OS=Arabidopsis thaliana OX=3702 GN=IQD1 PE=1 SV=1	--	--	hypothetical protein POPTR_001G215200v3 [Populus trichocarpa]
ptc-miR395c	CUGAAGUGUUUGGGGGAACUC	21	gene-POPTR_001G216900	LHW	--	Molecular Function: transcription factor activity, sequence-specific DNA binding (GO:0003700);; Molecular Function: protein serine/threonine kinase activity (GO:0004674);; Cellular Component: nucleus (GO:0005634);; Cellular Component: cytosol (GO:0005829);; Biological Process: regulation of transcription, DNA-templated (GO:0006355);; Biological Process: protein phosphorylation (GO:0006468);; Biol…	--	--	--	--	bHLH-MYC and R2R3-MYB transcription factors N-terminal	Transcription factor LHW OS=Arabidopsis thaliana OX=3702 GN=LHW PE=1 SV=1	S	Function unknown	PREDICTED: transcription factor LHW-like isoform X1 [Populus euphratica]
ptc-miR395c	CUGAAGUGUUUGGGGGAACUC	21	gene-POPTR_001G237300		--	Cellular Component: integral component of membrane (GO:0016021);;	--	--	--	--	Fusaric acid resistance protein-like	--	S	Function unknown	hypothetical protein POPTR_0001s24390g [Populus trichocarpa]
ptc-miR395c	CUGAAGUGUUUGGGGGAACUC	21	gene-POPTR_001G350200	SNL2	--	Cellular Component: histone deacetylase complex (GO:0000118);; Biological Process: negative regulation of transcription from RNA polymerase II promoter (GO:0000122);; Cellular Component: chromatin (GO:0000785);; Molecular Function: RNA polymerase II transcription corepressor activity (GO:0001106);; Molecular Function: histone deacetylase activity (GO:0004407);; Biological Process: histone deacety…	K11644|0|pop:POPTR_0001s34800g|K11644 paired amphipathic helix protein Sin3a | (RefSeq) hypothetical protein	--	[B]	Chromatin structure and dynamics	C-terminal domain of Sin3a protein;; Paired amphipathic helix repeat;; Sin3 family co-repressor	Paired amphipathic helix protein Sin3-like 2 OS=Arabidopsis thaliana OX=3702 GN=SNL2 PE=1 SV=2	B	Chromatin structure and dynamics	hypothetical protein POPTR_001G350200v3 [Populus trichocarpa]
ptc-miR395c	CUGAAGUGUUUGGGGGAACUC	21	gene-POPTR_002G092400	ST3	Inorganic ion transport and metabolism	Cellular Component: integral component of plasma membrane (GO:0005887);; Molecular Function: secondary active sulfate transmembrane transporter activity (GO:0008271);; Biological Process: sulfate transmembrane transport (GO:1902358);;	K17469|0|pop:POPTR_0002s09300g|K17469 sulfate transporter 2, low-affinity | (RefSeq) POPTRDRAFT_830213; Low affinity sulfate transporter 3 family protein	--	[P]	Inorganic ion transport and metabolism	Sulfate permease family;; STAS domain	Low affinity sulfate transporter 3 OS=Stylosanthes hamata OX=37660 GN=ST3 PE=2 SV=1	P	Inorganic ion transport and metabolism	hypothetical protein POPTR_002G092400v3 [Populus trichocarpa]
ptc-miR395c	CUGAAGUGUUUGGGGGAACUC	21	gene-POPTR_002G253400	At4g28780	Lipid transport and metabolism ;; General function prediction only	Molecular Function: hydrolase activity, acting on ester bonds (GO:0016788);;	--	--	--	--	GDSL-like Lipase/Acylhydrolase	GDSL esterase/lipase At4g28780 OS=Arabidopsis thaliana OX=3702 GN=At4g28780 PE=2 SV=1	S	Function unknown	GDSL-motif lipase/hydrolase family protein [Populus trichocarpa]
ptc-miR395c	CUGAAGUGUUUGGGGGAACUC	21	gene-POPTR_004G094100	Polyubiquitin	Posttranslational modification, protein turnover, chaperones	--	K08770|0|pop:POPTR_0004s09300g|K08770 ubiquitin C | (RefSeq) POPTRDRAFT_648070; hypothetical protein	--	[OR]	--	Ubiquitin family;; Ubiquitin-2 like Rad60 SUMO-like;; Ubiquitin-like domain;; TUG ubiquitin-like domain	Polyubiquitin OS=Pisum sativum OX=3888 GN=PU1 PE=2 SV=2	O	Posttranslational modification, protein turnover, chaperones	hypothetical protein POPTR_004G094100v3 [Populus trichocarpa]
ptc-miR395c	CUGAAGUGUUUGGGGGAACUC	21	gene-POPTR_005G086800	TKI1	--	--	--	--	--	--	--	TSL-kinase interacting protein 1 OS=Arabidopsis thaliana OX=3702 GN=TKI1 PE=1 SV=2	S	Function unknown	hypothetical protein POPTR_0005s08900g [Populus trichocarpa]
ptc-miR395c	CUGAAGUGUUUGGGGGAACUC	21	gene-POPTR_005G213500	SULTR3;1	Inorganic ion transport and metabolism	Cellular Component: integral component of plasma membrane (GO:0005887);; Molecular Function: secondary active sulfate transmembrane transporter activity (GO:0008271);; Cellular Component: chloroplast (GO:0009507);; Biological Process: sulfate transmembrane transport (GO:1902358);;	K17471|0|pop:POPTR_0005s23530g|K17471 sulfate transporter 3 | (RefSeq) POPTRDRAFT_801425; Sulfate transporter 3.2 family protein	--	[P]	Inorganic ion transport and metabolism	Sulfate permease family;; STAS domain	Sulfate transporter 3.1 OS=Arabidopsis thaliana OX=3702 GN=SULTR3;1 PE=2 SV=1	P	Inorganic ion transport and metabolism	Sulfate transporter 3.2 family protein [Populus trichocarpa]
ptc-miR395c	CUGAAGUGUUUGGGGGAACUC	21	gene-POPTR_007G077700	TKI1	--	--	--	--	--	--	--	TSL-kinase interacting protein 1 OS=Arabidopsis thaliana OX=3702 GN=TKI1 PE=1 SV=2	S	Function unknown	hypothetical protein POPTR_007G077700v3, partial [Populus trichocarpa]
ptc-miR395c	CUGAAGUGUUUGGGGGAACUC	21	gene-POPTR_008G136500	TPS6	Carbohydrate transport and metabolism	Molecular Function: alpha,alpha-trehalose-phosphate synthase (UDP-forming) activity (GO:0003825);; Molecular Function: trehalose-phosphatase activity (GO:0004805);; Biological Process: trehalose biosynthetic process (GO:0005992);; Biological Process: dephosphorylation (GO:0016311);;	K16055|0|pop:POPTR_0008s13590g|K16055 trehalose 6-phosphate synthase/phosphatase [EC:2.4.1.15 3.1.3.12] | (RefSeq) POPTRDRAFT_656997; hypothetical protein	Starch and sucrose metabolism (ko00500)	[G]	Carbohydrate transport and metabolism	Glycosyltransferase family 20;; Trehalose-phosphatase;; haloacid dehalogenase-like hydrolase	Alpha,alpha-trehalose-phosphate synthase [UDP-forming] 6 OS=Arabidopsis thaliana OX=3702 GN=TPS6 PE=1 SV=2	G	Carbohydrate transport and metabolism	hypothetical protein POPTR_0008s13590g [Populus trichocarpa]
ptc-miR395c	CUGAAGUGUUUGGGGGAACUC	21	gene-POPTR_008G159000	APS1	Inorganic ion transport and metabolism	Biological Process: sulfate assimilation (GO:0000103);; Molecular Function: adenylylsulfate kinase activity (GO:0004020);; Molecular Function: sulfate adenylyltransferase (ATP) activity (GO:0004781);; Biological Process: phosphorylation (GO:0016310);;	K13811|0|pop:POPTR_0008s15880g|K13811 3'-phosphoadenosine 5'-phosphosulfate synthase [EC:2.7.7.4 2.7.1.25] | (RefSeq) POPTRDRAFT_720943; ATP sulfurylase family protein	Sulfur metabolism (ko00920)	[P]	Inorganic ion transport and metabolism	ATP-sulfurylase;; PUA-like domain	ATP sulfurylase 1, chloroplastic OS=Arabidopsis thaliana OX=3702 GN=APS1 PE=1 SV=1	P	Inorganic ion transport and metabolism	hypothetical protein POPTR_008G159000v3 [Populus trichocarpa]
ptc-miR395c	CUGAAGUGUUUGGGGGAACUC	21	gene-POPTR_009G006900	FUC1	Carbohydrate transport and metabolism	Molecular Function: alpha-L-fucosidase activity (GO:0004560);; Cellular Component: vacuole (GO:0005773);; Biological Process: carbohydrate metabolic process (GO:0005975);; Cellular Component: integral component of membrane (GO:0016021);;	K01206|0|pop:POPTR_0009s01240g|K01206 alpha-L-fucosidase [EC:3.2.1.51] | (RefSeq) POPTRDRAFT_204508; hypothetical protein	Other glycan degradation (ko00511)	[G]	Carbohydrate transport and metabolism	Alpha-L-fucosidase	Alpha-L-fucosidase 1 OS=Arabidopsis thaliana OX=3702 GN=FUC1 PE=1 SV=2	G	Carbohydrate transport and metabolism	hypothetical protein POPTR_009G006900v3, partial [Populus trichocarpa]
ptc-miR395c	CUGAAGUGUUUGGGGGAACUC	21	gene-POPTR_009G028600		--	Cellular Component: integral component of membrane (GO:0016021);;	--	--	--	--	Fusaric acid resistance protein-like;; Fusaric acid resistance protein family	--	S	Function unknown	hypothetical protein POPTR_009G028600v3 [Populus trichocarpa]
ptc-miR395c	CUGAAGUGUUUGGGGGAACUC	21	gene-POPTR_009G075800	UBA1	Posttranslational modification, protein turnover, chaperones	Molecular Function: ubiquitin activating enzyme activity (GO:0004839);; Molecular Function: ubiquitin-protein transferase activity (GO:0004842);; Molecular Function: ATP binding (GO:0005524);; Cellular Component: nucleus (GO:0005634);; Cellular Component: cytosol (GO:0005829);; Cellular Component: integral component of membrane (GO:0016021);; Biological Process: protein ubiquitination (GO:0016567…	K03178|0|pop:POPTR_0001s28750g|K03178 ubiquitin-activating enzyme E1 [EC:6.2.1.45] | (RefSeq) POPTRDRAFT_815464; ubiquitin activating enzyme 2 family protein	Ubiquitin mediated proteolysis (ko04120)	[O]	Posttranslational modification, protein turnover, chaperones	ThiF family;; Ubiquitin-activating enzyme active site;; Ubiquitin-activating enzyme E1 FCCH domain;; Ubiquitin-activating enzyme E1 four-helix bundle;; Ubiquitin fold domain	Ubiquitin-activating enzyme E1 1 OS=Arabidopsis thaliana OX=3702 GN=UBA1 PE=1 SV=1	H	Coenzyme transport and metabolism	hypothetical protein POPTR_0009s07960g [Populus trichocarpa]
ptc-miR395c	CUGAAGUGUUUGGGGGAACUC	21	gene-POPTR_009G121901		--	--	--	--	--	--	--	--	S	Function unknown	uncharacterized protein LOC112027043 [Quercus suber]
ptc-miR395c	CUGAAGUGUUUGGGGGAACUC	21	gene-POPTR_010G048550		--	--	--	--	--	--	--	--
ptc-miR395c	CUGAAGUGUUUGGGGGAACUC	21	gene-POPTR_010G081200	APS3	Inorganic ion transport and metabolism	Biological Process: sulfate assimilation (GO:0000103);; Molecular Function: adenylylsulfate kinase activity (GO:0004020);; Molecular Function: sulfate adenylyltransferase (ATP) activity (GO:0004781);; Cellular Component: chloroplast (GO:0009507);; Biological Process: phosphorylation (GO:0016310);;	K13811|0|pop:POPTR_0010s09140g|K13811 3'-phosphoadenosine 5'-phosphosulfate synthase [EC:2.7.7.4 2.7.1.25] | (RefSeq) POPTRDRAFT_658460; hypothetical protein	Sulfur metabolism (ko00920)	[P]	Inorganic ion transport and metabolism	ATP-sulfurylase;; PUA-like domain	ATP-sulfurylase 3, chloroplastic OS=Arabidopsis thaliana OX=3702 GN=APS3 PE=1 SV=1	P	Inorganic ion transport and metabolism	hypothetical protein POPTR_0010s09140g [Populus trichocarpa]
ptc-miR395c	CUGAAGUGUUUGGGGGAACUC	21	gene-POPTR_011G034400	RKS1	Extracellular structures	Molecular Function: protein serine/threonine kinase activity (GO:0004674);; Molecular Function: ATP binding (GO:0005524);; Cellular Component: plasma membrane (GO:0005886);; Biological Process: protein phosphorylation (GO:0006468);; Cellular Component: plasmodesma (GO:0009506);; Cellular Component: integral component of membrane (GO:0016021);; Molecular Function: ubiquitin protein ligase binding …	--	--	--	--	Protein tyrosine kinase;; Protein kinase domain;; D-mannose binding lectin;; S-locus glycoprotein domain;; PAN-like domain;; Domain of unknown function (DUF3403)	G-type lectin S-receptor-like serine/threonine-protein kinase RKS1 OS=Arabidopsis thaliana OX=3702 GN=RKS1 PE=3 SV=3	T	Signal transduction mechanisms	hypothetical protein POPTR_0011s02090g [Populus trichocarpa]
ptc-miR395c	CUGAAGUGUUUGGGGGAACUC	21	gene-POPTR_011G036600	RKS1	Signal transduction mechanisms	Molecular Function: protein serine/threonine kinase activity (GO:0004674);; Molecular Function: ATP binding (GO:0005524);; Cellular Component: plasma membrane (GO:0005886);; Biological Process: protein phosphorylation (GO:0006468);; Cellular Component: plasmodesma (GO:0009506);; Cellular Component: integral component of membrane (GO:0016021);; Molecular Function: ubiquitin protein ligase binding …	K04733|0|pop:POPTR_0011s02200g|K04733 interleukin-1 receptor-associated kinase 4 [EC:2.7.11.1] | (RefSeq) hypothetical protein	--	--	--	Protein tyrosine kinase;; Protein kinase domain;; D-mannose binding lectin;; S-locus glycoprotein domain;; PAN-like domain;; Domain of unknown function (DUF3403)	G-type lectin S-receptor-like serine/threonine-protein kinase RKS1 OS=Arabidopsis thaliana OX=3702 GN=RKS1 PE=3 SV=3	T	Signal transduction mechanisms	hypothetical protein POPTR_011G036600v3 [Populus trichocarpa]
ptc-miR395c	CUGAAGUGUUUGGGGGAACUC	21	gene-POPTR_011G095600	GA2OX1	Secondary metabolites biosynthesis, transport and catabolism	Molecular Function: iron ion binding (GO:0005506);; Biological Process: response to light stimulus (GO:0009416);; Biological Process: gibberellin catabolic process (GO:0045487);; Molecular Function: C-19 gibberellin 2-beta-dioxygenase activity (GO:0052634);; Biological Process: oxidation-reduction process (GO:0055114);;	K04125|7.43944e-178|pop:POPTR_0011s09770g|K04125 gibberellin 2-oxidase [EC:1.14.11.13] | (RefSeq) POPTRDRAFT_822902; dioxygenase family protein	Diterpenoid biosynthesis (ko00904)	[QR]	--	non-haem dioxygenase in morphine synthesis N-terminal;; 2OG-Fe(II) oxygenase superfamily;; 2OG-Fe(II) oxygenase superfamily	Gibberellin 2-beta-dioxygenase 1 OS=Pisum sativum OX=3888 GN=GA2OX1 PE=1 SV=1	S	Function unknown	dioxygenase family protein [Populus trichocarpa]
ptc-miR395c	CUGAAGUGUUUGGGGGAACUC	21	gene-POPTR_013G132700	At2g20710	--	--	--	--	[R]	General function prediction only	PPR repeat;; PPR repeat family;; Pentatricopeptide repeat domain	Pentatricopeptide repeat-containing protein At2g20710, mitochondrial OS=Arabidopsis thaliana OX=3702 GN=At2g20710 PE=2 SV=1	S	Function unknown	pentatricopeptide repeat-containing family protein [Populus trichocarpa]
ptc-miR395c	CUGAAGUGUUUGGGGGAACUC	21	gene-POPTR_014G010100	OOP	Amino acid transport and metabolism	Molecular Function: metalloendopeptidase activity (GO:0004222);; Biological Process: proteolysis (GO:0006508);; Biological Process: peptide metabolic process (GO:0006518);; Cellular Component: chloroplast (GO:0009507);; Molecular Function: metal ion binding (GO:0046872);;	K01414|0|jcu:105639937|K01414 oligopeptidase A [EC:3.4.24.70] | (RefSeq) probable cytosolic oligopeptidase A	--	[O]	Posttranslational modification, protein turnover, chaperones	Peptidase family M3	Organellar oligopeptidase A, chloroplastic/mitochondrial OS=Arabidopsis thaliana OX=3702 GN=OOP PE=1 SV=1	E	Amino acid transport and metabolism	hypothetical protein POPTR_014G010100v3 [Populus trichocarpa]
ptc-miR395c	CUGAAGUGUUUGGGGGAACUC	21	gene-POPTR_T073800	N	Transcription	Biological Process: signal transduction (GO:0007165);; Molecular Function: ADP binding (GO:0043531);;	--	--	--	--	TIR domain;; NB-ARC domain;; TIR domain;; Leucine rich repeat;; Leucine Rich repeats (2 copies)	TMV resistance protein N OS=Nicotiana glutinosa OX=35889 GN=N PE=1 SV=1	S	Function unknown	hypothetical protein POPTR_T073800v3 [Populus trichocarpa]
ptc-miR395c	CUGAAGUGUUUGGGGGAACUC	21	gene-POPTR_T080032	SULTR2;1	Inorganic ion transport and metabolism	Cellular Component: integral component of plasma membrane (GO:0005887);; Molecular Function: secondary active sulfate transmembrane transporter activity (GO:0008271);; Biological Process: sulfate transmembrane transport (GO:1902358);;	K17469|0|pop:POPTR_0007s05860g|K17469 sulfate transporter 2, low-affinity | (RefSeq) POPTRDRAFT_562634; Early nodulin 70 family protein	--	[P]	Inorganic ion transport and metabolism	Sulfate permease family;; Sulfate permease family	Sulfate transporter 2.1 OS=Arabidopsis thaliana OX=3702 GN=SULTR2;1 PE=2 SV=1	P	Inorganic ion transport and metabolism	hypothetical protein POPTR_T080000v3 [Populus trichocarpa]
