# Supplementary material for: Transcriptome and miRNAs Profiles Reveal Regulatory Network and Key Regulators of Secondary Xylem Formation in “84K” Poplar
Source: Int J Mol Sci. 2023 Nov 17;24(22):16438. doi: 10.3390/ijms242216438 (PMC10671414; doi:10.3390/ijms242216438)
Supplement: Supplementary file 1 [file ijms-24-16438-s001.zip › Supplementary Table S9.xlsx]

## Sheet: Additional file 15
Supplementary Table S9. Primers used for RT-qPCR of DEGs and DEMs in this study.
(a) RT-qPCR primers for DEGs
gene ID	gene name	Primer Sequences (5'-3')
	UBQ	F: AGACCTACACCAAGCCCAAGAAGAT
		R: TCCAGCACCGCACTCAGCATTAG
POPTR_001G216900	PagLHW	F: TTGGAGCAAACTGTCAAG
		R: GCAAACTACTAGGCATACC
POPTR_004G094100	PagPolyubiquitin 1	F: ACAACATCAGGAAGAATGCTACC
		R: CTTTACCGTGCTGGGAAGTTTA
POPTR_001G114000	PagGRF10	F: TGAGCCAGGGAGATGTAG
		R: GCGTCCTCTGTGTATGTG
POPTR_002G248500	PagBHLH62	F: CTGTGGACCCATTAGATACC
		R: GCCATAACCCATCTGAACA
POPTR_002G032400	PagbHLH110	F: CGAGCAGAAGCATCCAAG
		R: GCAAGATAGTGGCACCAG
POPTR_006G097000	PagLAC4	F: CTGGCACTCCACCTACAA
		R: CCCTACCGACAGCAAAGA
(b) RT-qPCR primers for DEMs
name	Primer Sequences (5'-3')
U6	F: TTATGGTATGCTTGGTCAGG
	R: AATGCCAGACTTGAGGTG
ptc-miR167e	F: CCTCATAGAAGCGCCAGCAG
	R: GTCGTATCCAGTGCAGGGTCCGAGGTATTCGCACTGGATACGACCGTCTG
ptc-miR167f-5p	F: CCATCGATCGAAGCGCC
	R: GTCGTATCCAGTGCAGGGTCCGAGGTATTCGCACTGGATACGACGTCTGC
ptc-miR482d-5p	F: CGAGTCATTACAGGGGGGC
	R: GTCGTATCCAGTGCAGGGTCCGAGGTATTCGCACTGGATACGACTCTTGC
ptc-miR395c	F: TTCCGAACCGAAGGGGG
	R: GTCGTATCCAGTGCAGGGTCCGAGGTATTCGCACTGGATACGACGGTTCC
ptc-miR396d	F: CCTTACCCCACAGCCGAAC
	R: GTCGTATCCAGTGCAGGGTCCGAGGTATTCGCACTGGATACGACGTTCGG
